# Supplementary material for: From intramolecular cyclization to intermolecular hydrolysis: TMSCF2Br-enabled carbonylation of aldehydes/ketones and amines to α-hydroxyamides
Source: Royal Society of Chemistry journal article supplement (doi:10.1039/d3qo00665d), 2023-01-01

# *Supporting Information*

## **From intramolecular cyclization to intermolecular hydrolysis: TMSCF<sub>2</sub>Br-enabled carbonylation of aldehydes/ketones and amines to $\alpha$ -hydroxyamides**

An Liu, Shuo Sun, Qiqiang Xie, Rumin Huang, Taige Kong, Chuanfa Ni, and Jinbo Hu\*

Key Laboratory of Organofluorine Chemistry, Center for Excellence in Molecular Synthesis, Shanghai Institute of Organic Chemistry, University of Chinese Academy of Sciences, Chinese Academy of Sciences 345 Ling-Ling Road, Shanghai 200032 (China) E-mail: jinbohu@sioc.ac.cn

### *Table of contents*

|   |                                                                                  |     |
|---|----------------------------------------------------------------------------------|-----|
| 1 | General information .....                                                        | S1  |
| 2 | Optimization of the reaction conditions.....                                     | S1  |
| 3 | Procedures for the synthesis of $\alpha$ -hydroxyamides.....                     | S2  |
| 4 | Gram-scale synthesis .....                                                       | S23 |
| 5 | The synthesis of <sup>18</sup> O-labeled $\alpha$ -hydroxyamides.....            | S24 |
| 6 | Mechanistic investigations.....                                                  | S25 |
| 7 | Procedures for the synthesis of substrates .....                                 | S27 |
| 8 | References .....                                                                 | S27 |
| 9 | <sup>1</sup> H, <sup>19</sup> F and <sup>13</sup> C NMR spectra of products..... | S28 |

## 1 General information

Unless otherwise mentioned, all solvents and reagents were purchased from commercial sources. Tetrahydrofuran (THF), 1,4-dioxacyclohexane (1,4-Dioxane) and *N,N*-dimethylformamide (DMF) were used directly from a solvent purification system. All the melting points were uncorrected. NMR spectra were recorded on 400 or 600 MHz NMR spectrometer for  $^1\text{H}$ ,  $^{19}\text{F}$ , and  $^{13}\text{C}$  acquisitions.  $^1\text{H}$  NMR chemical shifts were determined relative to internal  $(\text{CH}_3)_4\text{Si}$  (TMS) at  $\delta$  0.00 ppm or to the signal of the residual protonated solvent:  $\text{CDCl}_3$  at  $\delta$  7.26 ppm.  $^{19}\text{F}$  NMR chemical shifts were determined relative to internal  $\text{CFCl}_3$  at  $\delta$  0.00 ppm.  $^{13}\text{C}$  NMR chemical shifts were determined relative to the signal of the solvent:  $\text{CDCl}_3$  at  $\delta$  77.16 ppm. Data for  $^1\text{H}$ ,  $^{19}\text{F}$ ,  $^{13}\text{C}$  NMR were recorded as follows: chemical shifts ( $\delta$ , ppm), multiplicity (s = singlet, d = doublet, t = triplet, m = multiple, q = quartet, dd = doublet of doublets, dt = doublet of triplets, td = triplet of doublets, ddd = doublet of doublet of doublets, br = broad, tt = triplet of triplets). Mass spectra were recorded on a high-resolution mass spectrometer in the EI, FI, ESI or DART mode.

## 2 Optimization of the reaction conditions

*Typical procedures* (Taking entry 1 and 8 in Table 1 as examples)

### Entry 1:

Under argon atmosphere, a solution of 4-fluorobenzaldehyde (**1a**, 0.2 mmol, 1.0 equiv.),  $\text{TMSCF}_2\text{Br}$  (0.22 mmol, 1.1 equiv.) and *N,N*-dimethyl-1-phenylmethanamine (0.22 mmol, 1.1 equiv.) in 1,4-dioxane (2 mL) was stirred at room temperature for an hour. Then *t*-BuOH (0.4 mmol, 2.0 equiv.) was added and the mixture was stirred at 100 °C for 0.5 hour. Yields were determined by  $^{19}\text{F}$  NMR using 1-fluoronaphthalene as an internal standard.

### Entry 8:

Under argon atmosphere, a solution of 4-fluorobenzaldehyde (**1a**, 0.2 mmol, 1.0 equiv.),  $\text{TMSCF}_2\text{Br}$  (0.4 mmol, 2.0 equiv.) and *N,N*-dimethyl-1-phenylmethanamine (0.4 mmol, 2.0 equiv.) in 1,4-dioxane (2 mL) was stirred at room temperature for an

hour. Then H<sub>2</sub>O (0.2 mL) was added and the mixture was stirred at room temperature for 0.5 hour. Yields were determined by <sup>19</sup>F NMR using 1-fluoronaphthalene as an internal standard.

### 3 Procedures for the synthesis of $\alpha$ -hydroxyamides

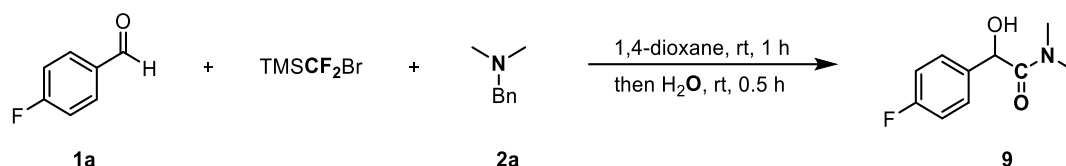

#### *Typical procedures* (Taking the compound **9** as an example)

Under argon atmosphere, a solution of 4-fluorobenzaldehyde (**1a**, 0.5 mmol, 1.0 equiv.), TMSCF<sub>2</sub>Br (1.0 mmol, 2.0 equiv.) and *N,N*-dimethyl-1-phenylmethanamine (**2a**, 1.0 mmol, 2.0 equiv.) in 1,4-dioxane (5 mL) was stirred at room temperature for an hour. Then H<sub>2</sub>O (0.5 mL) was added and the mixture was stirred at room temperature for 0.5 hour. The mixture was quenched with water, and extracted with ethyl acetate for three times. The combined extracts were washed with brine, dried over anhydrous Na<sub>2</sub>SO<sub>4</sub>, filtered and concentrated. The residue was purified by flash column chromatography using petroleum ether/ethyl acetate to afford product **9**.

#### 2-Hydroxy-*N,N*-dimethyl-2-(*p*-tolyl)acetamide (**5**)<sup>1</sup>

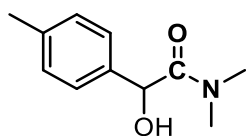

White solid (80 mg, 83% yield).  $R_f = 0.6$  (petroleum ether/ethyl acetate = 1:1). M.p.: 135 – 140 °C. <sup>1</sup>H NMR (400 MHz, CDCl<sub>3</sub>)  $\delta$  7.18 (q,  $J = 8.1$  Hz, 4H), 5.16 (s, 1H), 4.71 (s, 1H), 3.02 (s, 3H), 2.77 (s, 3H), 2.33 (s, 3H); <sup>13</sup>C NMR (101 MHz, CDCl<sub>3</sub>)  $\delta$  172.6, 138.4, 136.3, 129.8, 127.5, 71.4, 36.5, 36.3, 21.3; MS (EI,  $m/z$ ): 193 [M]<sup>+</sup>, 165, 121, 93; HRMS (FI,  $m/z$ ): exact mass calculated for [M]<sup>+</sup> (C<sub>11</sub>H<sub>15</sub>O<sub>2</sub>N) requires  $m/z$  193.1097, found  $m/z$  193.1102; IR (film): 3307, 3030, 2908, 1634, 1504, 1403, 1261, 1076, 913, 809, 743, 687, 577 cm<sup>-1</sup>.

### 2-(4-(*tert*-Butyl)phenyl)-2-hydroxy-*N,N*-dimethylacetamide (6)

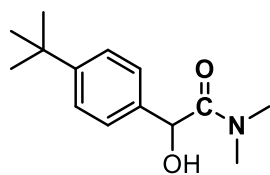

White solid (82 mg, 70% yield).  $R_f = 0.6$  (petroleum ether/ethyl acetate = 1:1). M.p.: 83 – 86 °C.  $^1\text{H NMR}$  (400 MHz,  $\text{CDCl}_3$ )  $\delta$  7.41 – 7.35 (m, 2H), 7.29 – 7.18 (m, 2H), 5.19 (s, 1H), 4.71 (s, 1H), 3.03 (s, 3H), 2.78 (s, 3H), 1.30 (s, 9H).  $^{13}\text{C NMR}$  (101 MHz,  $\text{CDCl}_3$ )  $\delta$  172.7, 151.5, 136.2, 127.2, 126.0, 71.4, 36.6, 36.4, 34.7, 31.4; **MS** (EI,  $m/z$ ): 235  $[\text{M}]^+$ , 207, 163; **HRMS** (FI,  $m/z$ ): exact mass calculated for  $[\text{M}]^+$  ( $\text{C}_{14}\text{H}_{21}\text{O}_2\text{N}$ ) requires  $m/z$  235.1567, found  $m/z$  235.1563; **IR (film)**: 3404, 2961, 2869, 1651, 1511, 1378, 1264, 1153, 1058, 857, 823, 657, 583  $\text{cm}^{-1}$ .

### 2-Hydroxy-2-(4-methoxyphenyl)-*N,N*-dimethylacetamide (7)

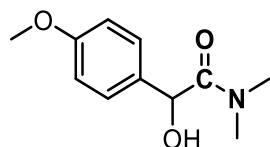

White solid (80.4 mg, 76% yield).  $R_f = 0.4$  (petroleum ether/ethyl acetate = 1:1). M.p.: 114 – 116 °C.  $^1\text{H NMR}$  (400 MHz,  $\text{CDCl}_3$ )  $\delta$  7.04 (dd,  $J = 141.7, 8.7$  Hz, 4H), 5.14 (s, 1H), 4.68 (s, 1H), 3.78 (s, 3H), 3.01 (s, 3H), 2.76 (s, 3H);  $^{13}\text{C NMR}$  (101 MHz,  $\text{CDCl}_3$ )  $\delta$  172.7, 159.7, 131.6, 128.8, 114.5, 77.5, 77.2, 76.8, 71.1, 55.4, 36.5, 36.3; **MS** (EI,  $m/z$ ): 209  $[\text{M}]^+$ , 181, 137, 109; **HRMS** (FI,  $m/z$ ): exact mass calculated for  $[\text{M}]^+$  ( $\text{C}_{11}\text{H}_{15}\text{O}_3\text{N}$ ) requires  $m/z$  209.1046, found  $m/z$  209.1053; **IR (film)**: 3312, 2932, 2833, 1633, 1508, 1457, 1420, 1403, 1259, 1177, 1071, 1030, 814, 737, 691, 641, 574  $\text{cm}^{-1}$ .

### 2-Hydroxy-*N,N*-dimethyl-2-(4-(methylthio)phenyl)acetamide (8)

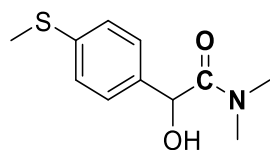

White solid (96 mg, 85% yield).  $R_f = 0.4$  (petroleum ether/ethyl acetate = 1:1). M.p.: 130 – 132 °C.  $^1\text{H NMR}$  (400 MHz,  $\text{CDCl}_3$ )  $\delta$  7.23 (s, 4H), 5.16 (d,  $J = 4.6$  Hz, 1H),

4.73 (d,  $J = 5.9$  Hz, 1H), 3.02 (s, 3H), 2.77 (s, 3H), 2.47 (s, 3H);  $^{13}\text{C}$  NMR (101 MHz,  $\text{CDCl}_3$ )  $\delta$  172.4, 139.2, 136.0, 128.0, 126.9, 71.2, 36.5, 36.4, 15.7; **MS** (EI,  $m/z$ ): 225  $[\text{M}]^+$ , 153, 109, 72; **HRMS** (EI,  $m/z$ ): exact mass calculated for  $[\text{M}]^+$  ( $\text{C}_{11}\text{H}_{15}\text{O}_2\text{NS}$ ) requires  $m/z$  225.0818, found  $m/z$  225.0820; **IR (film)**: 3316, 2918, 2360, 1633, 1489, 1425, 1403, 1258, 1074, 915, 806, 748, 669, 638, 536  $\text{cm}^{-1}$ .

### 2-(4-Fluorophenyl)-2-hydroxy-*N,N*-dimethylacetamide (9)

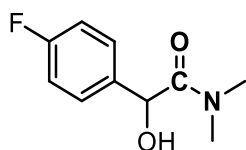

White solid (84 mg, 85% yield).  $R_f = 0.4$  (petroleum ether/ethyl acetate = 1:1). M.p.: 120 – 122 °C.  $^1\text{H}$  NMR (400 MHz,  $\text{CDCl}_3$ )  $\delta$  7.39 – 7.20 (m, 2H), 7.11 – 6.96 (m, 2H), 5.20 (s, 1H), 4.77 (s, 1H), 3.03 (s, 3H), 2.78 (s, 3H);  $^{19}\text{F}$  NMR (376 MHz,  $\text{CDCl}_3$ )  $\delta$  -113.27 (m, 1F);  $^{13}\text{C}$  NMR (101 MHz,  $\text{CDCl}_3$ )  $\delta$  172.3, 162.7 (d,  $J = 247.2$  Hz), 135.3 (d,  $J = 3.4$  Hz), 129.4 (d,  $J = 8.4$  Hz), 116.0 (d,  $J = 21.7$  Hz), 70.8, 36.4 (d,  $J = 7.1$  Hz). **MS** (EI,  $m/z$ ): 197  $[\text{M}]^+$ , 169, 125, 97, 72; **HRMS** (FI,  $m/z$ ): exact mass calculated for  $[\text{M}]^+$  ( $\text{C}_{10}\text{H}_{12}\text{O}_2\text{NF}$ ) requires  $m/z$  197.0847, found  $m/z$  197.0845; **IR (film)**: 3256, 1635, 1602, 1506, 1403, 1264, 1225, 1072, 913, 819, 743, 574  $\text{cm}^{-1}$ .

### 2-(4-Chlorophenyl)-2-hydroxy-*N,N*-dimethylacetamide (10)

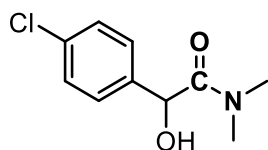

White solid (97 mg, 91% yield).  $R_f = 0.4$  (petroleum ether/ethyl acetate = 1:1). M.p.: 150 – 152 °C.  $^1\text{H}$  NMR (400 MHz,  $\text{CDCl}_3$ )  $\delta$  7.41 – 7.15 (m, 4H), 5.19 (s, 1H), 4.79 (s, 1H), 3.03 (s, 3H), 2.78 (s, 3H);  $^{13}\text{C}$  NMR (101 MHz,  $\text{CDCl}_3$ )  $\delta$  172.1, 137.8, 134.5, 129.3, 129.0, 70.9, 36.5, 36.4; **MS** (FI,  $m/z$ ): 213  $[\text{M}]^+$ ; **HRMS** (FI,  $m/z$ ): exact mass calculated for  $[\text{M}]^+$  ( $\text{C}_{10}\text{H}_{12}\text{O}_2\text{NCl}$ ) requires  $m/z$  213.0551, found  $m/z$  213.0558; **IR (film)**: 3297, 1636, 1505, 1403, 1261, 1076, 913, 814, 744, 641, 541  $\text{cm}^{-1}$ .

### 2-(4-Bromophenyl)-2-hydroxy-*N,N*-dimethylacetamide (11)

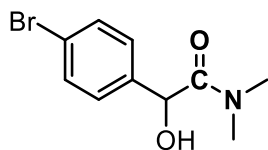

White solid (112.6 mg, 87% yield).  $R_f = 0.5$  (petroleum ether/ethyl acetate = 1:1). M.p.: 160 – 162 °C.  $^1\text{H NMR}$  (400 MHz,  $\text{CDCl}_3$ )  $\delta$  7.34 (dd,  $J = 118.5, 8.4$  Hz, 4H), 5.16 (d,  $J = 3.9$  Hz, 1H), 4.75 (d,  $J = 6.0$  Hz, 1H), 3.02 (s, 3H), 2.77 (s, 3H);  $^{13}\text{C NMR}$  (101 MHz,  $\text{CDCl}_3$ )  $\delta$  172.0, 138.3, 132.3, 129.3, 122.7, 70.9, 36.5, 36.5; **MS** (EI,  $m/z$ ): 257  $[\text{M}]^+$ , 229, 185, 72; **HRMS** (FI,  $m/z$ ): exact mass calculated for  $[\text{M}]^+$  ( $\text{C}_{10}\text{H}_{12}\text{O}_2\text{NBr}$ ) requires  $m/z$  257.0046, found  $m/z$  257.0047; **IR (film)**: 1635, 1507, 1405, 1260, 1075, 913, 812, 743, 633, 526  $\text{cm}^{-1}$ .

### 2-Hydroxy-*N,N*-dimethyl-2-(4-nitrophenyl)acetamide (12)

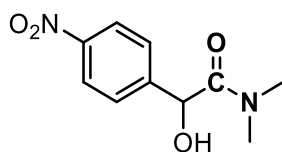

White solid (96 mg, 86% yield).  $R_f = 0.2$  (petroleum ether/ethyl acetate = 1:1). M.p.: 167 – 169 °C.  $^1\text{H NMR}$  (400 MHz,  $\text{CDCl}_3$ )  $\delta$  8.23 (d,  $J = 8.7$  Hz, 2H), 7.51 (d,  $J = 8.7$  Hz, 2H), 5.30 (d,  $J = 5.9$  Hz, 1H), 4.83 (d,  $J = 6.2$  Hz, 1H),  $^{13}\text{C NMR}$  (101 MHz,  $\text{CDCl}_3$ )  $\delta$  3.05 (s, 3H), 2.81 (s, 3H); 171.3, 148.0, 146.1, 128.6, 124.4, 70.6, 36.6, 36.5; **MS** (EI,  $m/z$ ): 224  $[\text{M}]^+$ , 194, 72; **HRMS** (FI,  $m/z$ ): exact mass calculated for  $[\text{M}]^+$  ( $\text{C}_{10}\text{H}_{12}\text{O}_4\text{N}_2$ ) requires  $m/z$  224.0792, found  $m/z$  224.0790; **IR (film)**: 3252, 1636, 1513, 1404, 1349, 1264, 1079, 913, 826, 743, 728, 699, 637  $\text{cm}^{-1}$ .

### 2-(4-Cyanophenyl)-2-hydroxy-*N,N*-dimethylacetamide (13)

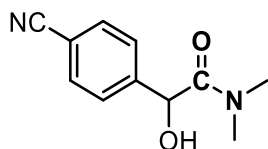

White solid (80 mg, 78% yield).  $R_f = 0.3$  (petroleum ether/ethyl acetate = 1:1). M.p.: 135 – 137 °C.  $^1\text{H NMR}$  (400 MHz,  $\text{CDCl}_3$ )  $\delta$  7.54 (dd,  $J = 87.6, 8.1$  Hz, 4H), 5.24 (d,  $J = 5.3$  Hz, 1H), 4.81 (d,  $J = 6.1$  Hz, 1H), 3.01 (s, 3H), 2.78 (s, 3H);  $^{13}\text{C NMR}$  (101

MHz, CDCl<sub>3</sub>)  $\delta$  171.3, 144.2, 132.9, 128.3, 118.4, 112.5, 70.8, 36.5, 36.5; **MS** (EI,  $m/z$ ): 204 [M]<sup>+</sup>, 132, 72; **HRMS** (FI,  $m/z$ ): exact mass calculated for [M]<sup>+</sup> (C<sub>11</sub>H<sub>12</sub>O<sub>2</sub>N<sub>2</sub>) requires  $m/z$  204.0893, found  $m/z$  204.0892; **IR (film)**: 3253, 2935, 2228, 1638, 1501, 1423, 1404, 1263, 1157, 1079, 818, 736, 687, 648, 568 cm<sup>-1</sup>.

#### 2-Hydroxy-*N,N*-dimethyl-2-(4-(trifluoromethyl)phenyl)acetamide (14)

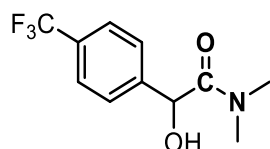

White solid (108 mg, 88% yield).  $R_f$  = 0.6 (petroleum ether/ethyl acetate = 1:1). M.p.: 133 – 135 °C. **<sup>1</sup>H NMR** (400 MHz, CDCl<sub>3</sub>)  $\delta$  7.53 (dd,  $J$  = 72.0, 8.0 Hz, 4H), 5.25 (s, 1H), 4.81 (s, 1H), 3.03 (s, 3H), 2.78 (s, 3H); **<sup>19</sup>F NMR** (376 MHz, CDCl<sub>3</sub>)  $\delta$  -62.74 (s, 3F); **<sup>13</sup>C NMR** (101 MHz, CDCl<sub>3</sub>)  $\delta$  171.8, 143.1, 130.8 (q,  $J$  = 32.6 Hz), 128.0, 126.1 (q,  $J$  = 3.8 Hz), 124.0 (q,  $J$  = 272.1 Hz), 120.0, 71.0, 36.5; **MS** (EI,  $m/z$ ): 247 [M]<sup>+</sup>, 175, 127, 72; **HRMS** (FI,  $m/z$ ): exact mass calculated for [M]<sup>+</sup> (C<sub>11</sub>H<sub>12</sub>O<sub>2</sub>NF<sub>3</sub>) requires  $m/z$  247.0815, found  $m/z$  247.0813; **IR (film)**: 3214, 2930, 1635, 1500, 1420, 1403, 1331, 1157, 1124, 1080, 1069, 819, 636 cm<sup>-1</sup>.

#### 2-Hydroxy-*N,N*-dimethyl-2-(4-(trifluoromethoxy)phenyl)acetamide (15)

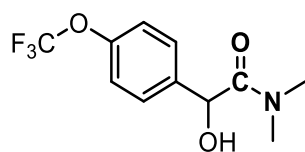

White solid (118 mg, 90% yield).  $R_f$  = 0.5 (petroleum ether/ethyl acetate = 1:1). M.p.: 111 – 113 °C. **<sup>1</sup>H NMR** (400 MHz, CDCl<sub>3</sub>)  $\delta$  7.27 (dd,  $J$  = 59.0, 8.3 Hz, 4H), 5.21 (s, 1H), 4.78 (s, 1H), 3.03 (s, 3H), 2.78 (s, 3H); **<sup>19</sup>F NMR** (376 MHz, CDCl<sub>3</sub>)  $\delta$  -57.90 (s, 3F); **<sup>13</sup>C NMR** (101 MHz, CDCl<sub>3</sub>)  $\delta$  172.1, 149.3 (d,  $J$  = 2.0 Hz), 138.0, 129.1, 121.6, 117.9 (q,  $J$  = 257.5 Hz), 70.8, 36.5 (d,  $J$  = 5.5 Hz); **MS** (EI,  $m/z$ ): 235, 191, 72; **HRMS** (FI,  $m/z$ ): exact mass calculated for [M]<sup>+</sup> (C<sub>11</sub>H<sub>12</sub>O<sub>3</sub>NF<sub>3</sub>) requires  $m/z$  263.0764, found  $m/z$  263.0767; **IR (film)**: 1737, 1637, 1505, 1404, 1215, 1155, 1079, 913, 743 cm<sup>-1</sup>.

#### 4-(2-(Dimethylamino)-1-hydroxy-2-oxoethyl)phenyl acetate (16)

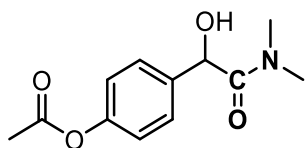

White solid (76 mg, 64% yield).  $R_f = 0.4$  (petroleum ether/ethyl acetate = 1:1). M.p.: 143 – 145 °C.  $^1\text{H NMR}$  (400 MHz,  $\text{CDCl}_3$ )  $\delta$  7.20 (dd,  $J = 96.3, 8.6$  Hz, 4H), 5.19 (d,  $J = 6.3$  Hz, 1H), 4.73 (d,  $J = 6.4$  Hz, 1H), 3.01 (s, 3H), 2.78 (s, 3H), 2.28 (s, 3H);  $^{13}\text{C NMR}$  (101 MHz,  $\text{CDCl}_3$ )  $\delta$  172.3, 169.3, 150.8, 136.8, 128.7, 122.2, 70.9, 36.5, 36.4, 21.2; **MS** (EI,  $m/z$ ): 237  $[\text{M}]^+$ , 209, 165, 123; **HRMS** (FI,  $m/z$ ): exact mass calculated for  $[\text{M}]^+$  ( $\text{C}_{12}\text{H}_{15}\text{O}_4\text{N}$ ) requires  $m/z$  237.0996, found  $m/z$  237.0993; **IR (film)**: 1764, 1633, 1505, 1403, 1203, 1077, 913, 743  $\text{cm}^{-1}$ .

#### 2-(2-Chlorophenyl)-2-hydroxy-*N,N*-dimethylacetamide (17)

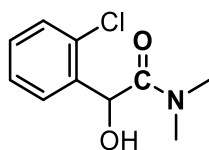

White solid (98 mg, 92% yield).  $R_f = 0.2$  (petroleum ether/ethyl acetate = 5:1). M.p.: 99 – 101 °C.  $^1\text{H NMR}$  (400 MHz,  $\text{CDCl}_3$ )  $\delta$  7.44 – 7.38 (m, 1H), 7.30 – 7.19 (m, 3H), 5.68 (s, 1H), 4.76 (s, 1H), 3.04 (s, 3H), 2.72 (s, 3H).  $^{13}\text{C NMR}$  (101 MHz,  $\text{CDCl}_3$ )  $\delta$  172.2, 136.8, 133.7, 129.9, 128.5, 127.9, 77.4, 77.1, 76.8, 67.8, 36.4, 36.0; **MS** (EI,  $m/z$ ): 178, 141, 72; **HRMS** (FI,  $m/z$ ): exact mass calculated for  $[\text{M}]^+$  ( $\text{C}_{10}\text{H}_{12}\text{O}_2\text{NCl}$ ) requires  $m/z$  213.0551, found  $m/z$  213.0555; **IR (film)**: 3394, 2931, 1651, 1500, 1474, 1441, 1378, 1261, 1065, 761, 737  $\text{cm}^{-1}$ .

#### 2-Hydroxy-2-(4-methoxy-3-nitrophenyl)-*N,N*-dimethylacetamide (18)

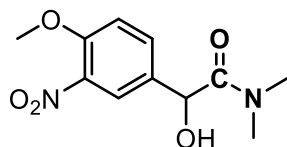

White solid (118 mg, 93% yield).  $R_f = 0.2$  (petroleum ether/ethyl acetate = 1:1). M.p.: 120 – 123 °C.  $^1\text{H NMR}$  (400 MHz,  $\text{CDCl}_3$ )  $\delta$  7.80 (d,  $J = 2.4$  Hz, 1H), 7.50 (dd,  $J = 8.7, 2.4$  Hz, 1H), 7.08 (d,  $J = 8.7$  Hz, 1H), 5.21 (s, 1H), 4.78 (s, 1H), 3.94 (s, 3H), 3.02 (s,



3H), 2.81 (s, 3H);  $^{13}\text{C}$  NMR (101 MHz,  $\text{CDCl}_3$ )  $\delta$  171.6, 153.0, 139.6, 133.2, 131.8, 124.9, 114.3, 77.5, 77.2, 76.8, 70.0, 56.8, 36.5 (d,  $J = 4$  Hz); **MS** (EI,  $m/z$ ): 254  $[\text{M}]^+$ , 226, 182, 166, 107, 72; **HRMS** (FI,  $m/z$ ): exact mass calculated for  $[\text{M}]^+$  ( $\text{C}_{11}\text{H}_{14}\text{O}_5\text{N}_2$ ) requires  $m/z$  254.0897, found  $m/z$  254.0904; **IR (film)**: 2994, 1769, 1758, 1644, 1530, 1373, 1246, 1056, 913, 743  $\text{cm}^{-1}$ .

### 2-Hydroxy-*N,N*-dimethyl-2-(perfluorophenyl)acetamide (19)

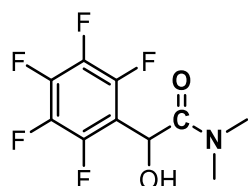

White solid (108 mg, 80% yield).  $R_f = 0.3$  (petroleum ether/ethyl acetate = 5:1). M.p.: 111 – 112 °C.  $^1\text{H}$  NMR (400 MHz,  $\text{CDCl}_3$ )  $\delta$  5.48 (d,  $J = 5.5$  Hz, 1H), 4.98 (d,  $J = 5.6$  Hz, 1H), 3.06 (s, 3H), 2.77 (s, 3H);  $^{19}\text{F}$  NMR (376 MHz,  $\text{CDCl}_3$ )  $\delta$  -142.48 (m, 2F), -152.87 (m, 1F), -160.76 (m, 2F);  $^{13}\text{C}$  NMR (101 MHz,  $\text{CDCl}_3$ )  $\delta$  169.5, 147.1 – 145.3 (m), 144.5 – 143.4 (m), 143.3 – 142.2 (m), 141.1 – 139.7 (m), 139.4 – 138.6 (m), 137.4 – 135.6 (m), 115.9 – 110.3 (m), 78.7 – 75.3 (m), 61.6, 36.9, 35.9; **MS** (EI,  $m/z$ ): 269  $[\text{M}]^+$ , 197, 72; **HRMS** (FI,  $m/z$ ): exact mass calculated for  $[\text{M}]^+$  ( $\text{C}_{10}\text{H}_8\text{O}_2\text{NF}_5$ ) requires  $m/z$  269.0470, found  $m/z$  269.0473; **IR (film)**: 3226, 1655, 1524, 1497, 1397, 1317, 1290, 1114, 1082, 993, 925, 857, 773  $\text{cm}^{-1}$ .

### 2-([1,1'-Biphenyl]-4-yl)-2-hydroxy-*N,N*-dimethylacetamide (20)

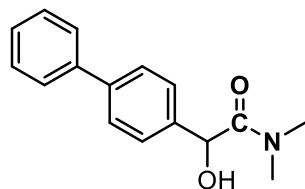

White solid (89 mg, 70% yield).  $R_f = 0.5$  (petroleum ether/ethyl acetate = 1:1). M.p.: 167 – 169 °C.  $^1\text{H}$  NMR (400 MHz,  $\text{CDCl}_3$ )  $\delta$  7.58 (t,  $J = 7.2$  Hz, 4H), 7.51 – 7.33 (m, 5H), 5.25 (d,  $J = 6.1$  Hz, 1H), 4.80 (d,  $J = 6.3$  Hz, 1H), 3.05 (s, 3H), 2.82 (s, 3H);  $^{13}\text{C}$  NMR (101 MHz,  $\text{CDCl}_3$ )  $\delta$  172.4, 141.5, 140.6, 138.2, 128.9, 128.0, 127.9, 127.6, 127.2, 71.4, 36.6, 36.4; **MS** (EI,  $m/z$ ): 255  $[\text{M}]^+$ , 227, 183, 155, 72; **HRMS** (FI,  $m/z$ ):

exact mass calculated for  $[M]^+$  ( $C_{16}H_{17}O_2N$ ) requires  $m/z$  255.1254, found  $m/z$  255.1252; **IR (film)**: 3318, 2914, 1632, 1498, 1400, 1260, 1075, 820, 755, 765, 733, 695  $cm^{-1}$ .

### 2-Hydroxy-*N,N*-dimethyl-2-(naphthalen-1-yl)acetamide (21)

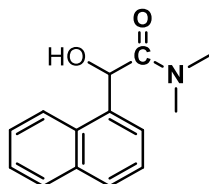

White solid (94 mg, 82% yield).  $R_f = 0.1$  (petroleum ether/ethyl acetate = 5:1). M.p.: 98 – 100 °C.  **$^1H$  NMR** (400 MHz,  $CDCl_3$ )  $\delta$  8.30 (d,  $J = 8.5$  Hz, 1H), 7.92 – 7.80 (m, 2H), 7.65 – 7.49 (m, 2H), 7.46 – 7.37 (m, 1H), 7.32 – 7.22 (m, 1H), 5.90 (s, 1H), 4.73 (s, 1H), 3.11 (s, 3H), 2.63 (s, 3H);  **$^{13}C$  NMR** (101 MHz,  $CDCl_3$ )  $\delta$  173.0, 134.8, 134.3, 131.5, 129.4, 128.9, 127.0, 126.1, 125.5, 125.0, 123.4, 68.9, 36.6, 36.3; **MS** (EI,  $m/z$ ): 229  $[M]^+$ , 157, 129, 72; **HRMS** (EI,  $m/z$ ): exact mass calculated for  $[M]^+$  ( $C_{14}H_{15}O_2N$ ) requires  $m/z$  229.1097, found  $m/z$  229.1101; **IR (film)**: 3395, 3046, 2930, 1647, 1507, 1379, 1261, 1161, 1056, 913, 803, 775, 743  $cm^{-1}$ .

### 2-(Benzo[b]thiophen-3-yl)-2-hydroxy-*N,N*-dimethylacetamide (22)

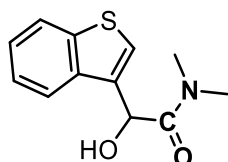

Pale yellow solid (99 mg, 84% yield).  $R_f = 0.5$  (petroleum ether/ethyl acetate = 1:1). M.p.: 93 – 95 °C.  **$^1H$  NMR** (400 MHz,  $CDCl_3$ )  $\delta$  7.37 (s, 1H), 6.48 – 6.17 (m, 4H), 5.30 (s, 1H), 4.57 (d,  $J = 5.9$  Hz, 1H), 3.04 (s, 3H), 2.84 (s, 3H);  **$^{13}C$  NMR** (101 MHz,  $CDCl_3$ )  $\delta$  170.2, 152.2, 142.8, 110.7, 108.2, 100.1, 64.7, 36.5, 36.3; **MS** (EI,  $m/z$ ): 235  $[M]^+$ , 169, 141, 97, 72; **HRMS** (FI,  $m/z$ ): exact mass calculated for  $[M]^+$  ( $C_{12}H_{13}O_2NS$ ) requires  $m/z$  235.0662, found  $m/z$  235.0658; **IR (film)**: 3106, 2902, 2849, 1644, 1498, 1399, 1256, 1065, 1009, 919, 830, 742, 637  $cm^{-1}$ .

### 2-Hydroxy-*N,N*-dimethyl-5-phenylpentanamide (23)

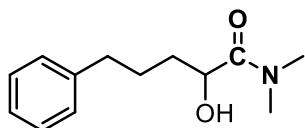

Yellow oil (95 mg, 86% yield).  $R_f = 0.5$  (petroleum ether/ethyl acetate = 1:1).  $^1\text{H NMR}$  (400 MHz,  $\text{CDCl}_3$ )  $\delta$  7.33 – 7.24 (m, 2H), 7.23 – 7.15 (m, 3H), 4.37 (dd,  $J = 8.2, 3.0$  Hz, 1H), 3.73 (br, 1H), 2.99 (s, 3H), 2.87 (s, 3H), 2.76 – 2.59 (m, 2H), 1.91 – 1.77 (m, 2H), 1.75 – 1.62 (m, 1H), 1.58 – 1.44 (m, 1H);  $^{13}\text{C NMR}$  (101 MHz,  $\text{CDCl}_3$ )  $\delta$  174.4, 141.9, 128.5, 128.4, 125.9, 67.9, 36.3, 36.0, 35.4, 33.9, 26.4; **MS** (FI,  $m/z$ ): 221  $[\text{M}]^+$ ; **HRMS** (FI,  $m/z$ ): exact mass calculated for  $[\text{M}]^+$  ( $\text{C}_{13}\text{H}_{19}\text{O}_2\text{N}$ ) requires  $m/z$  221.1410, found  $m/z$  221.1409; **IR (film)**: 3417, 3025, 2933, 2858, 1644, 1469, 1453, 1380, 1261, 1090, 913, 747, 700  $\text{cm}^{-1}$ .

#### 2-Hydroxy-*N,N*-dimethyl-4-phenylbutanamide (24)

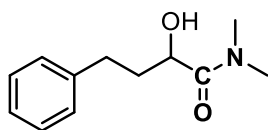

Yellow oil (48 mg, 46% yield).  $R_f = 0.5$  (petroleum ether/ethyl acetate = 1:1).  $^1\text{H NMR}$  (400 MHz,  $\text{CDCl}_3$ )  $\delta$  7.30 – 7.10 (m, 5H), 4.28 (dd,  $J = 9.0, 2.7$  Hz, 1H), 3.80 (s, 1H), 2.93 (s, 3H), 2.85 – 2.69 (m, 5H), 1.94 – 1.82 (m, 1H), 1.76 (qd,  $J = 8.6, 4.3$  Hz, 1H).  $^{13}\text{C NMR}$  (101 MHz,  $\text{CDCl}_3$ )  $\delta$  174.3, 141.3, 128.7, 128.5, 126.1, 77.5, 77.2, 76.8, 67.0, 36.5, 36.2, 35.9, 31.3; **MS** (EI,  $m/z$ ): 207  $[\text{M}]^+$ , 103, 91, 72; **HRMS** (FI,  $m/z$ ): exact mass calculated for  $[\text{M}]^+$  ( $\text{C}_{12}\text{H}_{17}\text{O}_2\text{N}$ ) requires  $m/z$  207.1254, found  $m/z$  207.1251; **IR (film)**: 3481, 3026, 2928, 2859, 1644, 1496, 1454, 1380, 1261, 1145, 1087, 753, 700, 492  $\text{cm}^{-1}$ .

#### 2-Hydroxy-*N,N*,3,3-tetramethylbutanamide (25)<sup>2</sup>

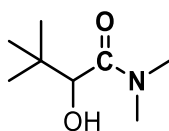

White solid (54 mg, 68% yield).  $R_f = 0.1$  (petroleum ether/ethyl acetate = 5:1). M.p.: 52 – 55 °C.  $^1\text{H NMR}$  (400 MHz,  $\text{CDCl}_3$ )  $\delta$  4.16 (d,  $J = 9.1$  Hz, 1H), 3.31 (d,  $J = 9.2$  Hz,

1H), 3.01 (s, 2H), 2.97 (s, 1H), 0.93 (s, 2H);  $^{13}\text{C}$  NMR (101 MHz,  $\text{CDCl}_3$ )  $\delta$  173.9, 77.5, 77.2, 76.8, 74.0, 38.0, 36.7, 35.9, 26.0; **MS** (EI,  $m/z$ ): 159  $[\text{M}]^+$ , 103, 72; **HRMS** (FI,  $m/z$ ): exact mass calculated for  $[\text{M}]^+$  ( $\text{C}_8\text{H}_{17}\text{O}_2\text{N}$ ) requires  $m/z$  159.1254, found  $m/z$  159.1257; **IR (film)**: 3447, 2955, 2870, 1636, 1505, 1480, 1365, 1258, 1145, 1047, 1020, 841  $\text{cm}^{-1}$ .

### 2-Hydroxy-*N,N*-dimethyl-2-(4-(methylthio)phenyl)propanamide (26)

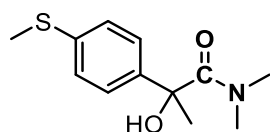

White solid (93 mg, 77% yield).  $R_f = 0.5$  (petroleum ether/ethyl acetate = 1:1). M.p.: 103 – 105 °C.  $^1\text{H}$  NMR (400 MHz,  $\text{CDCl}_3$ )  $\delta$  7.37 – 7.12 (m, 4H), 5.27 (s, 1H), 3.01 (s, 3H), 2.65 (s, 3H), 2.47 (d,  $J = 1.4$  Hz, 3H), 1.80 (d,  $J = 1.9$  Hz, 3H);  $^{13}\text{C}$  NMR (101 MHz,  $\text{CDCl}_3$ )  $\delta$  175.0, 139.9, 138.3, 126.8, 126.1, 74.5, 38.4, 37.7, 24.8, 15.8; **MS** (EI,  $m/z$ ): 239  $[\text{M}]^+$ , 167, 151, 125; **HRMS** (FI,  $m/z$ ): exact mass calculated for  $[\text{M}]^+$  ( $\text{C}_{12}\text{H}_{17}\text{O}_2\text{NS}$ ) requires  $m/z$  239.0975, found  $m/z$  239.0977; **IR (film)**: 3373, 2980, 2924, 1623, 1492, 1438, 1398, 1363, 1258, 1096, 1014, 918, 822, 752, 653, 586  $\text{cm}^{-1}$ .

### 3-(4-Fluorophenyl)-2-hydroxy-*N,N*,2-trimethylpropanamide (27)

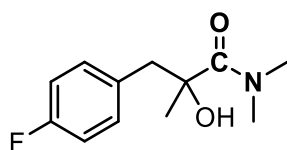

White solid (85 mg, 75% yield).  $R_f = 0.6$  (petroleum ether/ethyl acetate = 1:1). M.p.: 95 – 97 °C.  $^1\text{H}$  NMR (400 MHz,  $\text{CDCl}_3$ )  $\delta$  7.21 – 7.11 (m, 2H), 7.04 – 6.75 (m, 2H), 4.46 (s, 1H), 3.25 – 2.84 (m, 8H), 1.55 – 1.46 (m, 3H);  $^{19}\text{F}$  NMR (376 MHz,  $\text{CDCl}_3$ )  $\delta$  -116.3 – -116.5 (m, 1F);  $^{13}\text{C}$  NMR (101 MHz,  $\text{CDCl}_3$ )  $\delta$  174.9, 162.0 (d,  $J = 245.0$  Hz), 132.2, 131.6, 131.5, 115.1, 114.9, 74.8, 45.2, 26.1; **MS** (EI,  $m/z$ ): 207, 153, 116; **HRMS** (FI,  $m/z$ ): exact mass calculated for  $[\text{M}]^+$  ( $\text{C}_{12}\text{H}_{16}\text{O}_2\text{NF}$ ) requires  $m/z$  225.1160, found  $m/z$  225.1153; **IR (film)**: 2932, 1618, 1509, 1391, 1363, 1221, 1157, 1101, 913, 822, 746  $\text{cm}^{-1}$ .

## 2-Hydroxy-*N,N*-dimethyl-2-(naphthalen-2-yl)acetamide (28)

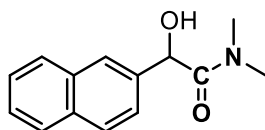

White solid (88 mg, 76% yield).  $R_f = 0.6$  (petroleum ether/ethyl acetate = 1:1). M.p.: 120 – 122 °C.  $^1\text{H NMR}$  (400 MHz,  $\text{CDCl}_3$ )  $\delta$  7.80 (m, 4H), 7.47 (dd,  $J = 6.3, 3.3$  Hz, 2H), 7.40 (d,  $J = 7.3$  Hz, 1H), 5.35 (s, 1H), 4.88 (s, 1H), 3.00 (s, 3H), 2.74 (s, 3H);  $^{13}\text{C NMR}$  (101 MHz,  $\text{CDCl}_3$ )  $\delta$  172.3, 136.4, 133.2, 133.1, 129.0, 128.0, 127.6, 126.8, 126.4, 126.3, 124.7, 71.6, 36.4, 36.2; **MS** (EI,  $m/z$ ): 229  $[\text{M}]^+$ , 201, 157, 129, 72; **HRMS** (EI,  $m/z$ ): exact mass calculated for  $[\text{M}]^+$  ( $\text{C}_{14}\text{H}_{15}\text{O}_2\text{N}$ ) requires  $m/z$  229.1097, found  $m/z$  229.1102; **IR (film)**: 3315, 2938, 1644, 1505, 1263, 1162, 1066, 868, 754, 693, 623  $\text{cm}^{-1}$ .

## *N,N*-Diethyl-2-hydroxy-2-(naphthalen-2-yl)acetamide (29)

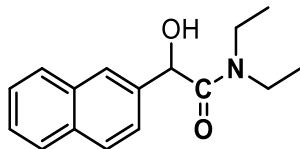

Yellow oil (107 mg, 83% yield).  $R_f = 0.6$  (petroleum ether/ethyl acetate = 1:1).  $^1\text{H NMR}$  (400 MHz,  $\text{CDCl}_3$ )  $\delta$  7.88 – 7.72 (m, 4H), 7.58 – 7.37 (m, 3H), 5.35 (s, 1H), 3.53 (dq,  $J = 14.1, 7.1$  Hz, 1H), 3.34 (dq,  $J = 14.1, 7.1$  Hz, 1H), 3.20 (dq,  $J = 14.3, 7.1$  Hz, 1H), 3.05 (dq,  $J = 14.4, 7.1$  Hz, 1H), 1.14 (t,  $J = 7.1$  Hz, 3H), 0.77 (t,  $J = 7.1$  Hz, 3H);  $^{13}\text{C NMR}$  (101 MHz,  $\text{CDCl}_3$ )  $\delta$  171.4, 137.1, 133.4, 133.2, 129.1, 128.0, 127.7, 126.9, 126.4, 126.4, 124.8, 71.7, 41.0, 40.8, 13.2, 12.6; **MS** (EI,  $m/z$ ): 257  $[\text{M}]^+$ , 229, 157, 129, 100, 72; **HRMS** (EI,  $m/z$ ): exact mass calculated for  $[\text{M}]^+$  ( $\text{C}_{16}\text{H}_{19}\text{NO}_2$ ) requires  $m/z$  257.1410, found  $m/z$  257.1418; **IR (film)**: 3070, 2974, 2929, 1685, 1637, 1464, 1381, 1360, 1277, 1066, 949, 819, 749, 478  $\text{cm}^{-1}$ .

## *N*-Ethyl-2-hydroxy-*N*-methyl-2-(naphthalen-2-yl)acetamide (30)

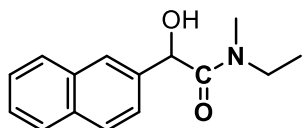

Yellow oil (87.8 mg, 72% yield).  $R_f = 0.4$  (petroleum ether/ethyl acetate = 5:1). A rotameric ratio of approx. 55:45 is observed in the  $^1\text{H NMR}$ .  $^1\text{H NMR}$  (400 MHz,  $\text{CDCl}_3$ )  $\delta$  7.87 – 7.74 (m, 4H), 7.47 (d,  $J = 9.5$  Hz, 2H), 7.40 (d,  $J = 8.2$  Hz, 1H), 5.35 (s, 0.45×1H), 5.31 (s, 0.55×1H), 5.18 – 4.09 (br, 1H), 3.58 – 3.34 (m, 1H), 3.28 – 3.03 (m, 1H), 2.97 (s, 0.45×3H), 2.71 (s, 0.55×3H), 1.09 (t,  $J = 7.2$  Hz, 0.55×3H), 0.74 (t,  $J = 7.1$  Hz, 0.45×3H);  $^{13}\text{C NMR}$  (101 MHz,  $\text{CDCl}_3$ )  $\delta$  171.8 (d,  $J = 9.1$  Hz), 137.0, 136.5, 133.3 (d,  $J = 2.9$  Hz), 129.0 (d,  $J = 2.8$  Hz), 127.8 (d,  $J = 29.6$  Hz), 126.9 (d,  $J = 15.5$  Hz), 126.4 (d,  $J = 2.7$  Hz), 124.8 (d,  $J = 2.7$  Hz), 71.7 (d,  $J = 3.1$  Hz), 43.4 (d,  $J = 35.4$  Hz), 33.5 (d,  $J = 77.2$  Hz), 12.2 (d,  $J = 50.3$  Hz). **MS** (FI,  $m/z$ ): 243  $[\text{M}]^+$ ; **HRMS** (FI,  $m/z$ ): exact mass calculated for  $[\text{M}]^+$  ( $\text{C}_{15}\text{H}_{17}\text{NO}_2$ ) requires  $m/z$  243.1254, found  $m/z$  243.1250; **IR (film)**: 3392, 2972, 2932, 1641, 1380, 1058, 820, 750  $\text{cm}^{-1}$ .

#### *N*-Benzyl-2-hydroxy-*N*-methyl-2-(naphthalen-2-yl)acetamide (31)

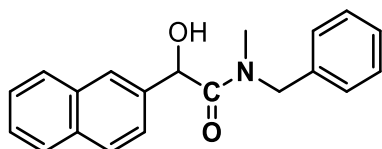

Yellow oil (112.2 mg, 74% yield).  $R_f = 0.2$  (petroleum ether/ethyl acetate = 4:1). Rotamers are observed in spectra.  $^1\text{H NMR}$  (400 MHz,  $\text{CDCl}_3$ )  $\delta$  7.88 – 7.75 (m, 4H), 7.53 – 6.84 (m, 8H), 5.42 (d,  $J = 7.1$  Hz, 1H), 4.89 (s, 1H), 4.78 – 4.05 (m, 2H), 3.02 – 2.66 (d,  $J = 112.3$  Hz, 3H);  $^{13}\text{C NMR}$  (101 MHz,  $\text{CDCl}_3$ )  $\delta$  172.8 (d,  $J = 21.8$  Hz), 136.7, 136.3 (d,  $J = 7.7$  Hz), 135.1, 133.3 (d,  $J = 3.6$  Hz), 129.2 (d,  $J = 13.1$  Hz), 128.8 (d,  $J = 16.4$  Hz), 128.1 – 127.7 (m), 127.0 (d,  $J = 7.9$  Hz), 126.6 – 126.4 (m), 124.8 (d,  $J = 17.7$  Hz), 71.9 (d,  $J = 6.1$  Hz), 52.2 (d,  $J = 20.4$  Hz), 34.2 (d,  $J = 10.3$  Hz); **MS** (FI,  $m/z$ ): 305  $[\text{M}]^+$ ; **HRMS** (FI,  $m/z$ ): exact mass calculated for  $[\text{M}]^+$  ( $\text{C}_{20}\text{H}_{19}\text{NO}_2$ ) requires  $m/z$  305.1410, found  $m/z$  305.1412; **IR (film)**: 3403, 3057, 3028, 2926, 1644, 1494, 1543, 1383, 1267, 1060, 821, 749, 701  $\text{cm}^{-1}$ .

### 2-Hydroxy-*N*-methyl-2-(naphthalen-2-yl)-*N*-phenethylacetamide (32)

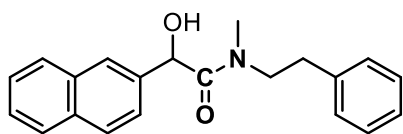

Yellow oil (144 mg, 90% yield).  $R_f = 0.5$  (petroleum ether/ethyl acetate = 2:1). A rotameric ratio of approx. 60:40 is observed in the  $^1\text{H NMR}$ .  $^1\text{H NMR}$  (400 MHz,  $\text{CDCl}_3$ )  $\delta$  7.90 – 7.71 (m, 4H), 7.57 – 6.73 (m, 8H), 5.30 (d,  $J = 5.9$  Hz, 0.6×1H), 5.15 (d,  $J = 5.8$  Hz, 0.4×1H), 4.93 – 4.81 (m, 1H), 3.91 – 3.21 (m, 2H), 3.04 (s, 1H), 2.87 – 2.04 (m, 4H);  $^{13}\text{C NMR}$  (101 MHz,  $\text{CDCl}_3$ )  $\delta$  172.2 (d,  $J = 2.5$  Hz), 138.4, 137.4, 136.9, 136.3, 133.4, 133.2 (d,  $J = 4.5$  Hz), 129.2, 129.0, 128.8 – 128.6 (m), 128.4, 128.0, 127.7 (d,  $J = 5.9$  Hz), 127.0, 126.8, 126.5 – 126.3 (m), 124.8, 71.8, 71.7, 50.9, 50.5, 35.3, 34.1, 33.9, 33.4. **MS** (FI,  $m/z$ ): 319  $[\text{M}]^+$ ; **HRMS** (FI,  $m/z$ ): exact mass calculated for  $[\text{M}]^+$  ( $\text{C}_{21}\text{H}_{21}\text{NO}_2$ ) requires  $m/z$  319.1567, found  $m/z$  319.1571; **IR (film)**: 3395, 3057, 3026, 2931, 1644, 1495, 1454, 1385, 1288, 1251, 1166, 1061, 863, 820, 749, 701, 479  $\text{cm}^{-1}$ .

### 2-Hydroxy-2-(naphthalen-2-yl)-1-(piperidin-1-yl)ethan-1-one (33)

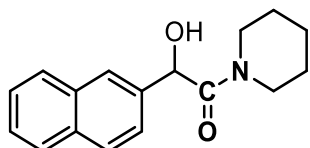

Pale yellow solid (107 mg, 79% yield).  $R_f = 0.7$  (petroleum ether/ethyl acetate = 1:1). M.p.: 93 – 95 °C.  $^1\text{H NMR}$  (400 MHz,  $\text{CDCl}_3$ )  $\delta$  7.90 – 7.73 (m, 4H), 7.55 – 7.38 (m, 3H), 5.38 (s, 1H), 4.98 (s, 1H), 3.93 – 3.69 (m, 1H), 3.64 – 3.44 (m, 1H), 3.35 – 3.08 (m, 2H), 1.67 – 1.39 (m, 4H), 1.35 – 1.18 (m, 1H), 1.01 – 0.69 (m, 1H).  $^{13}\text{C NMR}$  (101 MHz,  $\text{CDCl}_3$ )  $\delta$  170.5, 137.1, 133.5, 133.3, 129.2, 128.1, 127.8, 126.9, 126.5, 124.9, 71.6, 46.0, 44.2, 25.5, 25.4, 24.3; **MS** (EI,  $m/z$ ): 269  $[\text{M}]^+$ , 241, 157, 129, 112; **HRMS** (FI,  $m/z$ ): exact mass calculated for  $[\text{M}]^+$  ( $\text{C}_{17}\text{H}_{19}\text{NO}_2$ ) requires  $m/z$  269.1410, found  $m/z$  269.1415; **IR (film)**: 2936, 2855, 1638, 1470, 1444, 1396, 1256, 1066, 1011, 914, 818, 748, 683, 478  $\text{cm}^{-1}$ .

### 1-(Azocan-1-yl)-2-hydroxy-2-(naphthalen-2-yl)ethan-1-one (34)

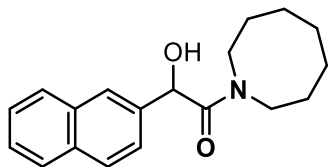

Yellow oil (80 mg, 54% yield).  $R_f = 0.2$  (petroleum ether/ethyl acetate = 3:1).  $^1\text{H NMR}$  (400 MHz,  $\text{CDCl}_3$ )  $\delta$  7.87 – 7.77 (m, 4H), 7.51 – 7.41 (m, 3H), 5.36 (s, 1H), 5.03 (s, 1H), 3.60 – 3.39 (m, 2H), 3.31 – 3.10 (m, 2H), 1.87 – 1.75 (m, 2H), 1.59 – 1.12 (m, 8H);  $^{13}\text{C NMR}$  (101 MHz,  $\text{CDCl}_3$ )  $\delta$  171.8, 136.8, 133.2 (d,  $J = 9.5$  Hz), 129.0, 127.9, 127.7, 127.0, 126.3, 124.9, 71.9, 48.5, 47.6, 26.5, 26.3, 25.7, 25.6, 23.8; **MS** (FI,  $m/z$ ): 297  $[\text{M}]^+$ ; **HRMS** (FI,  $m/z$ ): exact mass calculated for  $[\text{M}]^+$  ( $\text{C}_{19}\text{H}_{23}\text{NO}_2$ ) requires  $m/z$  297.1723, found  $m/z$  297.1722; **IR (film)**: 3387, 2927, 2853, 1636, 1474, 1396, 1064, 819, 748  $\text{cm}^{-1}$ .

### 2-Hydroxy-1-(4-methylpiperidin-1-yl)-2-(naphthalen-2-yl)ethan-1-one (35)

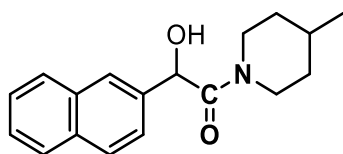

Yellow oil (124 mg, 87% yield).  $R_f = 0.6$  (petroleum ether/ethyl acetate = 2:1).  $^1\text{H NMR}$  (400 MHz,  $\text{CDCl}_3$ )  $\delta$  7.89 – 7.73 (m, 4H), 7.50 (dt,  $J = 6.8, 3.7$  Hz, 2H), 7.42 (t,  $J = 6.6$  Hz, 1H), 5.38 (t,  $J = 5.5$  Hz, 1H), 4.99 – 4.92 (m, 1H), 4.68 – 4.57 (m, 1H), 3.75 – 3.65 (m, 1H), 2.97 – 2.47 (m, 2H), 1.75 – 1.05 (m, 4H), 1.03 – 0.01 (m, 4H);  $^{13}\text{C NMR}$  (101 MHz,  $\text{CDCl}_3$ )  $\delta$  170.4 (d,  $J = 13.5$  Hz), 137.0 (d,  $J = 20.1$  Hz), 133.4 (d,  $J = 4.5$  Hz), 133.2, 129.0 (d,  $J = 2.6$  Hz), 128.0 (d,  $J = 4.1$  Hz), 127.7 (d,  $J = 4.1$  Hz), 126.9, 126.7, 126.4, 124.8 (d,  $J = 5.8$  Hz), 71.5 (d,  $J = 10.6$  Hz), 45.1 (d,  $J = 28.5$  Hz), 43.4 (d,  $J = 9.7$  Hz), 34.1, 33.6 (d,  $J = 5.7$  Hz), 32.8, 30.7, 21.5 (d,  $J = 11.8$  Hz); **MS** (FI,  $m/z$ ): 283  $[\text{M}]^+$ ; **HRMS** (FI,  $m/z$ ): exact mass calculated for  $[\text{M}]^+$  ( $\text{C}_{18}\text{H}_{21}\text{NO}_2$ ) requires  $m/z$  283.1567, found  $m/z$  283.1565; **IR (film)**: 3391, 2949, 2925, 1640, 1456, 1397, 1270, 1242, 1068, 973, 819, 748  $\text{cm}^{-1}$ .

### 2-Hydroxy-1-morpholino-2-(naphthalen-2-yl)ethan-1-one (36)



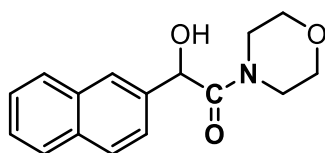

White solid (87 mg, 64% yield).  $R_f = 0.4$  (petroleum ether/ethyl acetate = 1:1). M.p.: 135 – 137 °C.  $^1\text{H NMR}$  (400 MHz,  $\text{CDCl}_3$ )  $\delta$  7.92 – 7.72 (m, 4H), 7.55 – 7.48 (m, 2H), 7.41 (dd,  $J = 8.5, 1.8$  Hz, 1H), 5.37 (d,  $J = 5.4$  Hz, 1H), 4.81 (d,  $J = 5.7$  Hz, 1H), 3.85 – 3.50 (m, 4H), 3.48 – 2.95 (m, 4H);  $^{13}\text{C NMR}$  (101 MHz,  $\text{CDCl}_3$ )  $\delta$  171.1, 136.5, 133.4, 133.4, 129.4, 128.1, 127.9, 127.0, 126.7, 126.7, 124.7, 71.8, 66.7, 66.0, 45.4, 43.3; **MS** (EI,  $m/z$ ): 271  $[\text{M}]^+$ , 243, 157, 129; **HRMS** (FI,  $m/z$ ): exact mass calculated for  $[\text{M}]^+$  ( $\text{C}_{16}\text{H}_{17}\text{NO}_3$ ) requires  $m/z$  271.1203, found  $m/z$  271.1209; **IR (film)**: 3404, 2922, 2855, 1642, 1458, 1388, 1360, 1271, 1246, 1112, 1068, 1028, 913, 747, 478  $\text{cm}^{-1}$ .

### 2-Hydroxy-2-(naphthalen-2-yl)-1-(4-phenylpiperidin-1-yl)ethan-1-one (37)

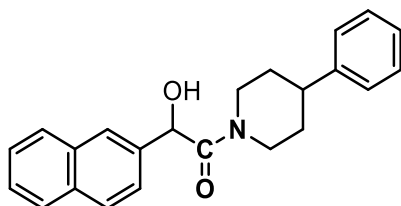

Yellow oil (124 mg, 93% yield).  $R_f = 0.5$  (petroleum ether/ethyl acetate = 2:1). A rotameric ratio of approx. 54:46 is observed in the  $^1\text{H NMR}$ .  $^1\text{H NMR}$  (400 MHz,  $\text{CDCl}_3$ )  $\delta$  7.91 – 7.77 (m, 4H), 7.48 (s, 3H), 7.34 – 7.01 (m, 4H), 6.81 (d,  $J = 7.1$  Hz, 1H), 5.45 (s,  $0.46 \times 1\text{H}$ ), 5.42 (s,  $0.54 \times 1\text{H}$ ), 4.83 (d,  $J = 12.9$  Hz, 1H), 4.28 (s, 1H), 3.84 (d,  $J = 13.5$  Hz, 1H), 3.08 – 2.49 (m, 3H), 2.11 – 0.41 (m, 4H);  $^{13}\text{C NMR}$  (101 MHz,  $\text{CDCl}_3$ )  $\delta$  170.7 (d,  $J = 11.1$  Hz), 144.6 (d,  $J = 17.1$  Hz), 136.9 (d,  $J = 25.2$  Hz), 133.5 – 133.2 (m), 129.1 (d,  $J = 4.1$  Hz), 128.6, 128.4, 128.0 (d,  $J = 9.3$  Hz), 127.8 (d,  $J = 5.2$  Hz), 127.1 – 126.3 (m), 124.8 (d,  $J = 4.0$  Hz), 71.6 (d,  $J = 12.2$  Hz), 45.5 (d,  $J = 34.4$  Hz), 43.8 (d,  $J = 17.4$  Hz), 42.3 (d,  $J = 19.0$  Hz), 33.4, 32.8 (d,  $J = 6.4$  Hz), 31.6; **MS** (FI,  $m/z$ ): 345  $[\text{M}]^+$ ; **HRMS** (FI,  $m/z$ ): exact mass calculated for  $[\text{M}]^+$  ( $\text{C}_{23}\text{H}_{23}\text{NO}_2$ ) requires  $m/z$  345.1723, found  $m/z$  345.1718; **IR (film)**: 3394, 3055, 2936, 1640, 1452, 1396, 1268, 1069, 1006, 749  $\text{cm}^{-1}$ .

**1-(4-(4-Fluorophenyl)piperidin-1-yl)-2-hydroxy-2-(naphthalen-2-yl)ethan-1-one**  
**(38)**

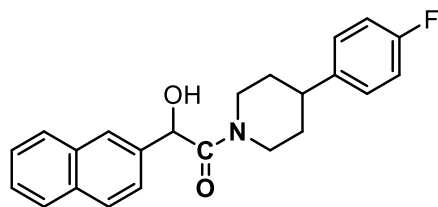

Yellow oil (162 mg, 89% yield).  $R_f = 0.6$  (petroleum ether/ethyl acetate = 1:1). A rotameric ratio of approx. 56:44 is observed in the  $^{19}\text{F}$  NMR.  $^1\text{H}$  NMR (400 MHz,  $\text{CDCl}_3$ )  $\delta$  7.92 – 7.77 (m, 4H), 7.53 – 7.40 (m, 3H), 7.09 (dd,  $J = 8.6, 5.4$  Hz, 1H), 6.98 (t,  $J = 8.7$  Hz, 1H), 6.85 – 6.70 (m, 2H), 5.45 (d,  $J = 6.0$  Hz, 0.44 $\times$ 1H), 5.42 (d,  $J = 5.7$  Hz, 0.56 $\times$ 1H), 5.00 (d,  $J = 6.1$  Hz, 0.53 $\times$ 1H), 4.95 (d,  $J = 6.3$  Hz, 0.44 $\times$ 1H), 4.83 (d,  $J = 12.4$  Hz, 1H), 3.87 – 3.79 (m, 1H), 3.10 – 2.41 (m, 3H), 1.93 – 0.15 (m, 4H);  $^{19}\text{F}$  NMR (376 MHz,  $\text{CDCl}_3$ )  $\delta$  -116.87 (tt,  $J = 8.6, 5.2$  Hz, 0.44 $\times$ 1F), -117.06 (tt,  $J = 8.6, 5.2$  Hz, 0.56 $\times$ 1F);  $^{13}\text{C}$  NMR (101 MHz,  $\text{CDCl}_3$ )  $\delta$  170.7 (d,  $J = 10.8$  Hz), 140.4 – 140.1 (m), 137.0, 136.7, 133.4 (d,  $J = 7.2$  Hz), 133.2, 129.1 (d,  $J = 2.2$  Hz), 128.1 – 127.7 (m), 127.0, 126.7, 126.6 – 126.2 (m), 124.8 (d,  $J = 9.1$  Hz), 115.2 (t), 71.6 (d,  $J = 10.4$  Hz), 45.5, 45.2, 43.8, 43.6, 41.6, 41.4, 33.5, 32.9 (d,  $J = 11.8$  Hz), 31.7; MS (FI,  $m/z$ ): 363  $[\text{M}]^+$ ; HRMS (FI,  $m/z$ ): exact mass calculated for  $[\text{M}]^+$  ( $\text{C}_{23}\text{H}_{22}\text{NO}_2\text{F}$ ) requires  $m/z$  363.1629, found  $m/z$  363.1633; IR (film): 3396, 2936, 2860, 1640, 1509, 1472, 1395, 1277, 1220, 1159, 1068, 1004, 833, 749  $\text{cm}^{-1}$ .

**2-Hydroxy-1-(4-(4-methoxyphenyl)piperidin-1-yl)-2-(naphthalen-2-yl)ethan-1-one**  
**(39)**

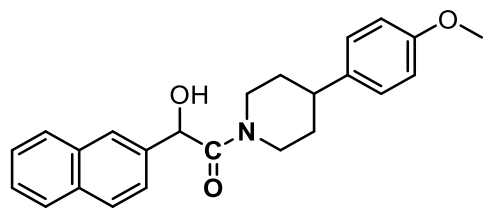

Yellow oil (142 mg, 76% yield).  $R_f = 0.5$  (petroleum ether/ethyl acetate = 1:1). A rotameric ratio of approx. 54:46 is observed in the  $^1\text{H}$  NMR.  $^1\text{H}$  NMR (400 MHz,

CDCl<sub>3</sub>)  $\delta$  7.92 – 7.78 (m, 4H), 7.54 – 7.42 (m, 3H), 7.06 (d,  $J = 8.4$  Hz, 1H), 6.85 (d,  $J = 8.4$  Hz, 1H), 6.71 (dd,  $J = 22.4, 8.6$  Hz, 2H), 5.47 (s, 0.46 $\times$ 1H), 5.43 (s, 0.54 $\times$ 1H), 5.01 (s, 1H), 4.82 (d,  $J = 13.4$  Hz, 1H), 3.88 – 3.79 (m, 1H), 3.77 (s, 0.46 $\times$ 3H), 3.69 (s, 0.54 $\times$ 3H), 3.04 – 2.47 (m, 3H), 1.91 – 0.37 (m, 4H); <sup>13</sup>C NMR (101 MHz, CDCl<sub>3</sub>)  $\delta$  170.5 (d,  $J = 12.4$  Hz), 158.1 (d,  $J = 18.4$  Hz), 137.1 – 136.5 (m), 133.3 (d,  $J = 6.8$  Hz), 133.1, 129.0 (d,  $J = 2.8$  Hz), 127.9 (d,  $J = 9.8$  Hz), 127.7 (d,  $J = 5.1$  Hz), 127.4, 127.2, 126.9, 126.6, 126.4 (d,  $J = 5.8$  Hz), 124.8 (d,  $J = 4.7$  Hz), 71.5 (d,  $J = 11.6$  Hz), 55.1 (d,  $J = 7.5$  Hz), 45.6, 45.2, 43.7 (d,  $J = 16.5$  Hz), 41.3 (d,  $J = 19.7$  Hz), 33.6, 32.9 (d,  $J = 6.3$  Hz), 31.8; **MS** (FI,  $m/z$ ): 375 [M]<sup>+</sup>; **HRMS** (FI,  $m/z$ ): exact mass calculated for [M]<sup>+</sup> (C<sub>24</sub>H<sub>25</sub>NO<sub>3</sub>) requires  $m/z$  375.1829, found  $m/z$  375.1827; **IR (film)**: 3395, 2935, 2862, 1644, 1513, 1462, 1394, 1367, 1247, 1179, 1069, 828 cm<sup>-1</sup>.

**1-(6,7-Dimethoxy-3,4-dihydroisoquinolin-2(1H)-yl)-2-hydroxy-2-(naphthalen-2-yl)ethan-1-one (40)**

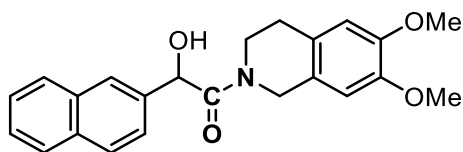

Yellow oil (176 mg, 93% yield).  $R_f = 0.4$  (petroleum ether/ethyl acetate = 1:1). Rotamers are observed in spectrum. <sup>1</sup>H NMR (400 MHz, CDCl<sub>3</sub>)  $\delta$  7.88 – 7.73 (m, 4H), 7.49 – 7.36 (m, 3H), 6.60 – 6.07 (m, 2H), 5.45 (d,  $J = 4.0$  Hz, 1H), 5.17 – 4.19 (m, 3H), 4.06 (d,  $J = 15.4$  Hz, 1H), 3.92 – 3.65 (m, 5H), 3.56 (s, 1H), 3.46 (t,  $J = 5.8$  Hz, 1H), 2.85 – 1.93 (m, 2H); <sup>13</sup>C NMR (101 MHz, CDCl<sub>3</sub>)  $\delta$  171.2 (d,  $J = 10.6$  Hz), 148.3 – 147.5 (m), 136.5 (d,  $J = 27.3$  Hz), 133.1 (d,  $J = 2.8$  Hz), 129.2, 127.9 (d,  $J = 11.4$  Hz), 127.7 (d,  $J = 5.3$  Hz), 126.8 (d,  $J = 2.7$  Hz), 126.5 – 126.2 (m), 125.2, 124.7 (d,  $J = 2.4$  Hz), 124.0, 123.3, 111.3 (d,  $J = 20.3$  Hz), 109.2, 108.6, 71.9, 56.3 – 55.5 (m), 46.3, 44.8, 42.5, 41.3, 27.7 (d,  $J = 21.2$  Hz); **MS** (FI,  $m/z$ ): 377 [M]<sup>+</sup>; **HRMS** (FI,  $m/z$ ): exact mass calculated for [M]<sup>+</sup> (C<sub>23</sub>H<sub>23</sub>NO<sub>4</sub>) requires  $m/z$  377.1622, found  $m/z$  377.1619; **IR (film)**: 3399, 3055, 2935, 2836, 1644, 1518, 1454, 1257, 1115, 1049, 734 cm<sup>-1</sup>.

***N*-(((*S*)-3,4-Dimethoxybicyclo[4.2.0]octa-1(6),2,4-trien-7-yl)methyl)-2-hydroxy-*N*-**

**methyl-2-(naphthalen-2-yl)acetamide (41)**

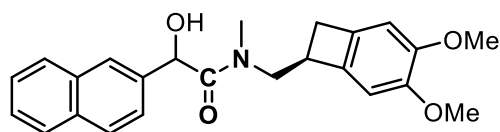

Yellow oil (173 mg, 89% yield).  $R_f = 0.2$  (petroleum ether/ethyl acetate = 2:1). d.r. 60:40 (determined by HPLC). A mixture of 4 pairs of isomers (arising from rotational isomerism and diastereoisomerism). d.r. 60:40 (determined by HPLC).  $^1\text{H NMR}$  (400 MHz,  $\text{CDCl}_3$ )  $\delta$  7.96 – 7.59 (m, 4H), 7.53 – 7.31 (m, 3H), 6.76 – 5.11 (m, 3H), 4.87 (br, 1H), 4.21 – 3.62 (m, 7H), 3.35 – 2.97 (m, 4H), 2.89 – 2.37 (m, 3H);  $^{13}\text{C NMR}$  (101 MHz,  $\text{CDCl}_3$ )  $\delta$  172.7 (d,  $J = 18.4$  Hz), 172.3 (d,  $J = 18.0$  Hz), 150.3, 150.2, 149.9, 149.7, 149.4 (d,  $J = 9.0$  Hz), 137.3 – 136.2 (m), 134.8, 134.5, 134.1 – 133.1 (m), 129.2 – 128.9 (m), 128.1 – 127.6 (m), 127.2 – 126.7 (m), 126.6 – 126.2 (m), 125.0, 124.7, 124.5, 107.4 (d,  $J = 14.7$  Hz), 106.9 (d,  $J = 23.7$  Hz), 106.3 (d,  $J = 36.0$  Hz), 71.7 (d,  $J = 14.1$  Hz), 56.3 (d,  $J = 3.7$  Hz), 56.2 – 55.9 (m), 55.6, 53.6, 52.5 (d,  $J = 14.9$  Hz), 52.0, 40.8, 40.6, 40.0 (d,  $J = 4.6$  Hz), 36.4, 35.9, 34.2 (d,  $J = 6.7$  Hz), 33.9, 33.5, 32.8; **MS** (EI,  $m/z$ ): 391  $[\text{M}]^+$ ; **HRMS** (EI,  $m/z$ ): exact mass calculated for  $[\text{M}]^+$  ( $\text{C}_{24}\text{H}_{25}\text{NO}_4$ ) requires  $m/z$  391.1778, found  $m/z$  391.1781; **IR (film)**: 3399, 3054, 2923, 1650, 1591, 1490, 1384, 1059, 822, 750  $\text{cm}^{-1}$ .

***N*-(3-(4-((Difluoro- $\lambda^3$ -methyl)- $\lambda^2$ -fluoraneyl)phenoxy)-3-phenylpropyl)-2-hydroxy-*N*-methyl-2-(naphthalen-2-yl)acetamide (42)**

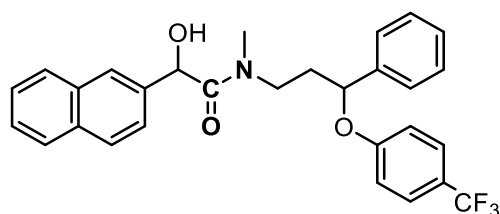

Yellow oil (155 mg, 63% yield).  $R_f = 0.4$  (petroleum ether/ethyl acetate = 2:1). A mixture of 4 pairs of isomers (arising from rotational isomerism and diastereoisomerism). d.r. 60:40 (determined by chiral HPLC).  $^1\text{H NMR}$  (400 MHz,  $\text{CDCl}_3$ )  $\delta$  7.75 (d,  $J = 25.8$  Hz, 4H), 7.61 – 7.09 (m, 9H), 6.98 – 6.50 (m, 3H), 5.34 (d,

$J = 2.8$  Hz,  $0.58 \times 1\text{H}$ ), 5.30 (d,  $J = 6.1$  Hz,  $0.42 \times 1\text{H}$ ), 5.15 – 4.59 (m, 1H), 3.89 – 3.21 (m, 2H), 3.09 – 2.67 (m, 3H), 2.29 – 1.41 (m, 2H);  **$^{19}\text{F}$  NMR** (376 MHz,  $\text{CDCl}_3$ )  $\delta$  -60.5 – -64.4 (m, 3F);  **$^{13}\text{C}$  NMR** (101 MHz,  $\text{CDCl}_3$ )  $\delta$  172.5 (d,  $J = 5.9$  Hz), 172.1 (d,  $J = 37.5$  Hz), 160.2, 159.8 (d,  $J = 13.0$  Hz), 140.3 (d,  $J = 12.2$  Hz), 139.5, 137.1, 136.8, 136.3 (d,  $J = 3.1$  Hz), 133.4 – 133.1 (m), 129.4 – 128.7 (m), 128.3 – 127.6 (m), 127.1 (d,  $J = 10.3$  Hz), 126.6 (dd,  $J = 13.3, 9.8$  Hz), 125.7 – 125.4 (m), 125.0, 124.6 (dd,  $J = 12.5, 3.5$  Hz), 115.7 (d,  $J = 9.9$  Hz), 115.4 (d,  $J = 12.4$  Hz), 78.0 – 77.1 (m), 72.0, 71.7 (d,  $J = 7.3$  Hz), 46.6, 46.2, 45.7, 45.3, 36.5, 36.0 (d,  $J = 8.5$  Hz), 35.7, 35.0, 34.0 (d,  $J = 6.4$  Hz); **MS** (FI,  $m/z$ ): 493  $[\text{M}]^+$ ; **HRMS** (FI,  $m/z$ ): exact mass calculated for  $[\text{M}]^+$  ( $\text{C}_{29}\text{H}_{26}\text{F}_3\text{NO}_4$ ) requires  $m/z$  493.1859, found  $m/z$  493.1866; **IR (film)**: 3396, 3058, 2931, 1644, 1516, 1380, 1327, 1248, 1162, 1111, 1067, 836,  $750\text{ cm}^{-1}$ ; **Chiral HPLC** (IK3,  $0.46 \times 15$  cm,  $5\ \mu\text{m}$ ,  $n$ -hexane/isopropanol = 90/10, flow  $0.7\text{ mL/min}$ , detection at  $214\text{ nm}$ ): retention time = 39.23 min (29.70%), 42.08 min (20.59%), 104.45 min (29.85%) and 132.98 min (19.85%).

**4871 SS-1-9+- IK3 91 214 0.7**

|                  |                         |                   |          |
|------------------|-------------------------|-------------------|----------|
| Sample Name:     | SS-1-9+- IK3 91 214 0.7 | Injection Volume: | 3.0      |
| Vial Number:     | BD6                     | Channel:          | UV_VIS_2 |
| Sample Type:     | unknown                 | Wavelength:       | 214.0    |
| Control Program: | test-dad                | Bandwidth:        | 4        |
| Quantif. Method: | WXL                     | Dilution Factor:  | 1.0000   |
| Recording Time:  | 2023-7-3 13:34          | Sample Weight:    | 1.0000   |
| Run Time (min):  | 168.54                  | Sample Amount:    | 1.0000   |

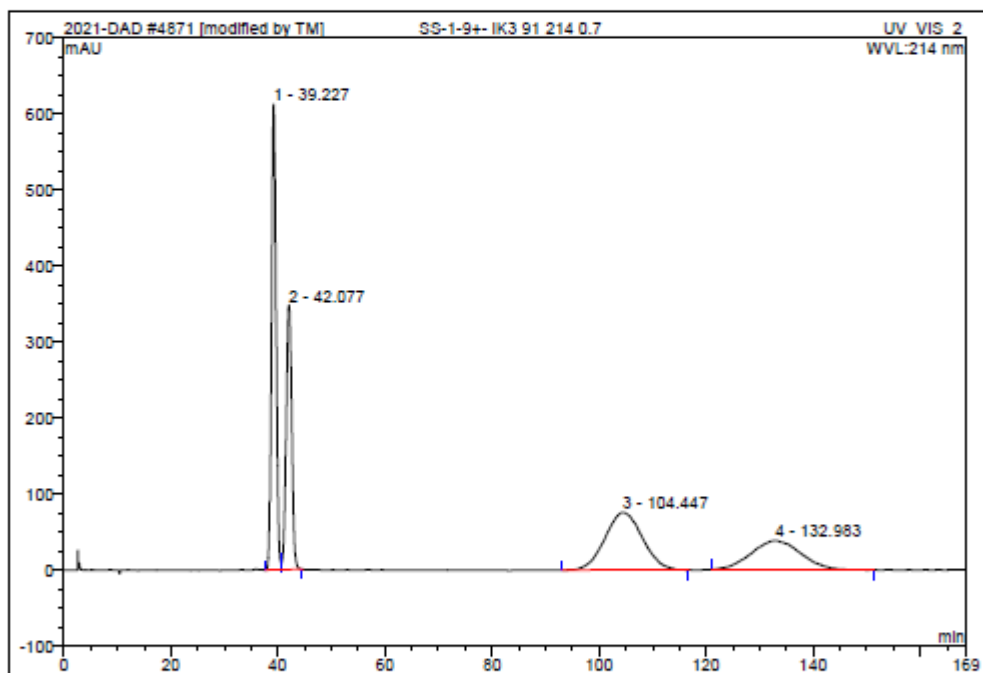

| No.    | Ret.Time<br>min | Peak Name | Height<br>mAU | Area<br>mAU*min | Rel.Area<br>% | Amount | Type |
|--------|-----------------|-----------|---------------|-----------------|---------------|--------|------|
| 1      | 39.23           | n.a.      | 612.229       | 608.551         | 29.70         | n.a.   | BM   |
| 2      | 42.08           | n.a.      | 347.693       | 421.839         | 20.59         | n.a.   | MB   |
| 3      | 104.45          | n.a.      | 75.602        | 611.608         | 29.85         | n.a.   | BMB* |
| 4      | 132.98          | n.a.      | 38.256        | 406.687         | 19.85         | n.a.   | BMB* |
| Total: |                 |           | 1073.780      | 2048.685        | 100.00        | 0.000  |      |

*N*-(2-(Benzhydryloxy)ethyl)-2-hydroxy-*N*-methyl-2-(naphthalen-2-yl)acetamide

(43)

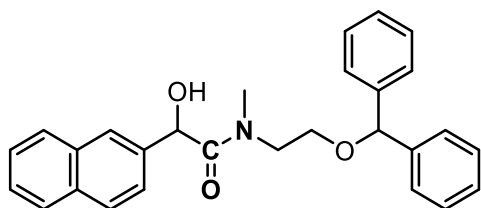

Yellow oil (179 mg, 84% yield).  $R_f = 0.8$  (petroleum ether/ethyl acetate = 1:1). A rotameric ratio of approx. 62:38 is observed in the  $^1\text{H NMR}$ .  $^1\text{H NMR}$  (400 MHz,  $\text{CDCl}_3$ )  $\delta$  7.87 – 7.74 (m, 4H), 7.54 – 7.42 (m, 3H), 7.35 – 7.12 (m, 10H), 5.63 (s, 0.38 $\times$ 1H), 5.40 (s, 0.62 $\times$ 1H), 5.27 (s, 0.62 $\times$ 1H), 5.12 (s, 0.38 $\times$ 1H), 3.95 – 3.05 (m, 4H), 3.00 (s, 0.38 $\times$ 3H), 2.86 (s, 0.62 $\times$ 3H);  $^{13}\text{C NMR}$  (101 MHz,  $\text{CDCl}_3$ )  $\delta$  172.6 (d,  $J = 53.1$  Hz), 141.8 (d,  $J = 2.3$  Hz), 141.6, 141.4, 137.0, 136.3, 133.3 – 133.0 (m), 129.0 (d,  $J = 2.9$  Hz), 128.4 (d,  $J = 5.4$  Hz), 128.3, 128.2, 128.0, 127.7 – 127.5 (m), 127.5 – 127.3 (m), 127.0, 126.8, 126.7 – 126.6 (m), 126.4, 126.3 (d,  $J = 4.0$  Hz), 84.1, 83.9, 71.7 (d,  $J = 1.9$  Hz), 66.8, 65.6, 49.1, 48.6, 36.2, 34.5; **MS** (FI,  $m/z$ ): 425  $[\text{M}]^+$ ; **HRMS** (FI,  $m/z$ ): exact mass calculated for  $[\text{M}]^+$  ( $\text{C}_{28}\text{H}_{27}\text{NO}_3$ ) requires  $m/z$  425.1985, found  $m/z$  425.1992; **IR (film)**: 3400, 3057, 2936, 1651, 1493, 1453, 1384, 1062, 862, 820, 745, 703, 479  $\text{cm}^{-1}$ .

**2-((1-(2-Hydroxy-2-(naphthalen-2-yl)acetyl)piperidin-4-yl)methyl)-5,6-dimethoxy-2,3-dihydro-1H-inden-1-one (44)**

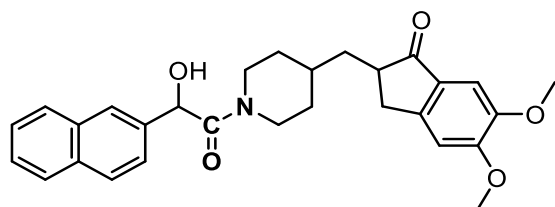

Yellow oil (207 mg, 88% yield).  $R_f = 0.2$  (petroleum ether/ethyl acetate = 1:1). A mixture of 4 pairs of isomers (arising from rotational isomerism and diastereoisomerism). d.r. 50:50 (determined by chiral HPLC).  $^1\text{H NMR}$  (400 MHz,  $\text{CDCl}_3$ )  $\delta$  7.96 – 7.69 (m, 4H), 7.49 (dd,  $J = 6.4, 3.2$  Hz, 2H), 7.41 (dt,  $J = 8.5, 2.5$  Hz, 1H), 7.12 (d,  $J = 20.4$  Hz, 1H), 6.86 – 6.73 (m, 1H), 5.37 (s, 1H), 4.93 (s, 1H), 4.68 (t,  $J = 13.9$  Hz, 1H), 3.99 – 3.91 (m, 3H), 3.88 (d,  $J = 8.5$  Hz, 3H), 3.82 – 3.67 (m, 1H), 3.36 – 2.39 (m, 5H), 1.98 – 0.04 (m, 6H);  $^{13}\text{C NMR}$  (101 MHz,  $\text{CDCl}_3$ )  $\delta$  207.1 (d,  $J = 3.9$  Hz), 170.4 (d,  $J = 18.3$  Hz), 155.5 (d,  $J = 5.3$  Hz), 149.4 (d,  $J = 5.2$  Hz), 148.4, 136.9, 136.8, 133.3 (d,  $J = 4.9$  Hz), 133.1, 129.3 – 128.9 (m), 128.1 – 127.8 (m), 127.7 (d,  $J = 3.6$  Hz), 127.6, 126.8 (d,  $J = 3.9$  Hz), 126.6, 126.3 (d,  $J = 4.7$  Hz), 124.7, 124.5 (d,  $J = 5.6$  Hz), 107.3 (d,  $J = 4.9$  Hz), 104.3 (d,  $J = 5.3$  Hz), 71.5 (d,  $J = 9.7$  Hz), 56.1

(d,  $J = 14.1$  Hz), 45.3 – 44.4 (m), 43.2 (d,  $J = 14.5$  Hz), 38.3 – 37.8 (m), 34.2, 34.0, 33.6 – 32.9 (m), 32.7, 32.2 – 31.8 (m), 31.6 – 31.0 (m), 30.6; **MS** (DART,  $m/z$ ): 425 ( $[M+H]^+$ ); **HRMS** (DART,  $m/z$ ): exact mass calculated for  $[M+H]^+$  ( $C_{29}H_{32}NO_5$ ) requires  $m/z$  474.2275, found  $m/z$  474.2278; **IR (film)**: 3390, 2925, 1693, 1640, 1463, 1313, 1265, 1123, 1067, 1036, 732  $cm^{-1}$ . **Chiral HPLC** (Lux 5u Cellulose-3,  $0.46 \times 25$  cm,  $5 \mu m$ ,  $CH_3CN/H_2O = 50/50$ , flow 0.7 mL/min, detection at 214 nm): retention time = 15.89 min (24.90%), 17.60 min (25.11%), 19.92 min (25.11%) and 24.02 min (24.88%).

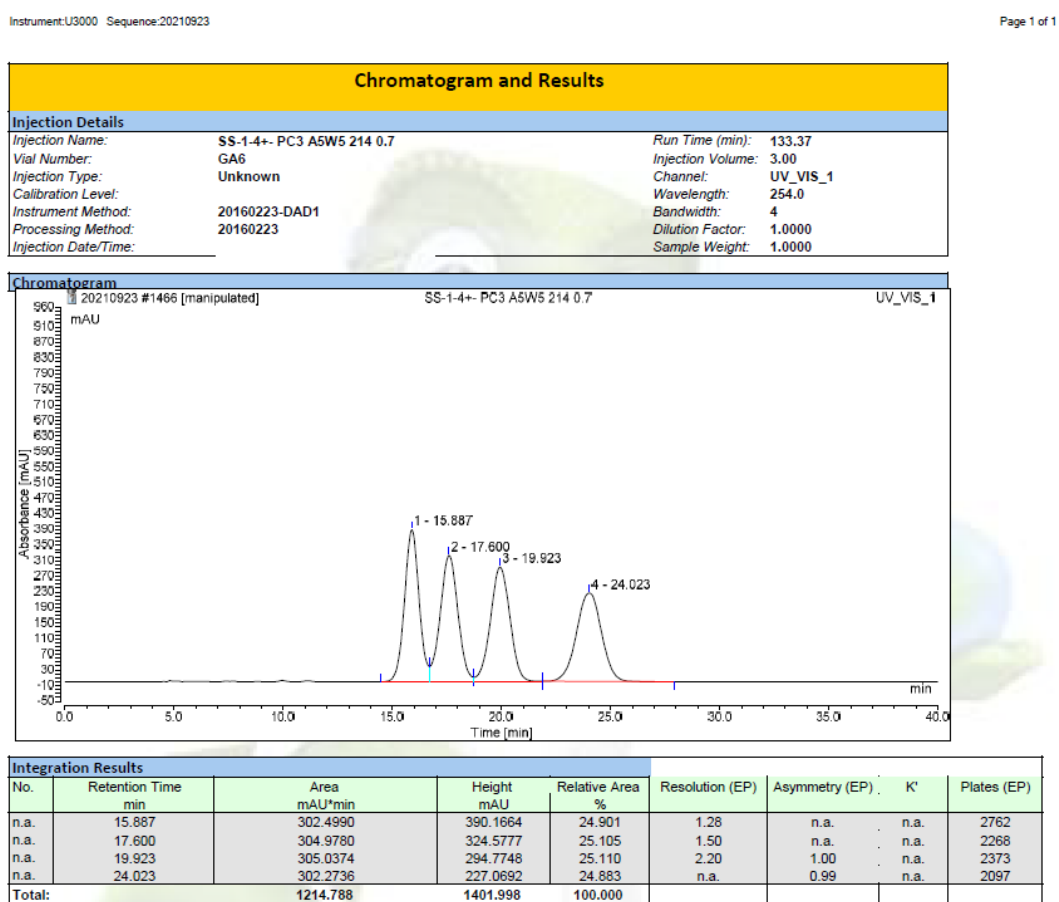

## 4 Gram-scale synthesis

Under argon atmosphere, a solution of 4-fluorobenzaldehyde (**1**, 10.0 mmol, 1.0 equiv.),  $TMSCF_2Br$  (20.0 mmol, 2.0 equiv.) and *N,N*-dimethyl-1-phenylmethanamine (**2**, 20.0 mmol, 2.0 equiv.) in 1,4-dioxane (50 mL) was stirred at room temperature for



1.0 hour. Then H<sub>2</sub>O (10 mL) was added and the mixture was stirred at room temperature for 0.5 hour. The mixture was quenched with water, and extracted with ethyl acetate for three times. The combined extracts were washed with brine, dried over anhydrous Na<sub>2</sub>SO<sub>4</sub>, filtered and concentrated. The residue was purified by flash column chromatography using petroleum ether/ethyl acetate to afford product (1.6 g, 81%).

## 5 The synthesis of <sup>18</sup>O-labeled $\alpha$ -hydroxyamides

Under argon atmosphere, a solution of 4-fluorobenzaldehyde (**1**, 0.2 mmol, 1.0 equiv.), TMSCF<sub>2</sub>Br (0.4 mmol, 2.0 equiv.) and *N,N*-dimethyl-1-phenylmethanamine (**2**, 0.4 mmol, 2.0 equiv.) in 1,4-dioxane (2 mL) was stirred at room temperature for 1.0 hour. Then H<sub>2</sub><sup>18</sup>O (0.2 mL) was added and the mixture was stirred at room temperature for 0.5 hour. The mixture was quenched with water, and extracted with ethyl acetate for three times. The combined extracts were washed with brine, dried over anhydrous Na<sub>2</sub>SO<sub>4</sub>, filtered and concentrated. The residue was purified by flash column chromatography using petroleum ether/ethyl acetate to afford product. The <sup>18</sup>O content of sample [<sup>18</sup>O]- $\alpha$ -hydroxyamides **46** was estimated peak heights of <sup>16</sup>O- and <sup>18</sup>O-parent peaks in mass spectrum. And the final **46** enriched in the <sup>18</sup>O isotope with 97%

### 2-(4-Fluorophenyl)-2-hydroxy-*N,N*-dimethylacetamide-<sup>18</sup>O (**45**)

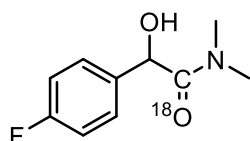

White solid (32 mg, 80% yield, 97% <sup>18</sup>O-isotopic purity.). *R<sub>f</sub>* = 0.4 (petroleum ether/ethyl acetate = 1:1). M.p.: 118 – 120 °C. <sup>1</sup>H NMR (400 MHz, CDCl<sub>3</sub>)  $\delta$  7.29 (dt, *J* = 9.7, 4.7 Hz, 2H), 7.05 (t, *J* = 8.5 Hz, 2H), 5.19 (d, *J* = 5.4 Hz, 1H), 4.75 (d, *J* = 6.1 Hz, 1H), 3.03 (s, 3H), 2.78 (s, 3H); <sup>19</sup>F NMR (376 MHz, CDCl<sub>3</sub>)  $\delta$  -113.6 – -113.9 (m, 1F); <sup>13</sup>C NMR (101 MHz, CDCl<sub>3</sub>)  $\delta$  172.3, 164.0, 161.6, 135.3 (d, *J* = 3.4 Hz), 129.4 (d, *J* = 8.3 Hz), 116.1 (d, *J* = 21.6 Hz), 70.9, 36.5 (d, *J* = 6.3 Hz); MS (EI, *m/z*): 199 [M]<sup>+</sup>, 169, 125, 97, 74; HRMS (FI, *m/z*): exact mass calculated for [M]<sup>+</sup> (C<sub>10</sub>H<sub>12</sub>O<sup>18</sup>ONF) requires *m/z* 199.0889, found *m/z* 199.0887. IR (film): 3291, 2925,

1612, 1506, 1403, 1261, 1255, 1156, 1701, 817, 749, 574  $\text{cm}^{-1}$ .

## 6 Mechanistic investigations

### i. monitoring experiments (GC-MS and $^{19}\text{F}$ NMR)

Under argon atmosphere, a solution of 4-phenylbenzaldehyde (0.5 mmol, 1.0 equiv.),  $\text{TMSCF}_2\text{Br}$  (1.0 mmol, 2.0 equiv.) and *N,N*-dimethyl-1-phenylmethanamine (**2a**, 1.0 mmol, 2.0 equiv.) in 1,4-dioxane (5 mL) was stirred at room temperature for 1.0 hour. 1-Fluoronaphthalene (30  $\mu\text{L}$ ) was added into the mixture as an internal standard, and the reaction was monitored by GC-MS and  $^{19}\text{F}$  NMR. Then  $\text{H}_2\text{O}$  (0.5 mL) was added and the mixture was stirred at room temperature for 0.5 hour, the reaction was monitored again by GC-MS and  $^{19}\text{F}$  NMR.

*Peaks in GC spectrum were identified by the corresponding mass spectral signals, see:*

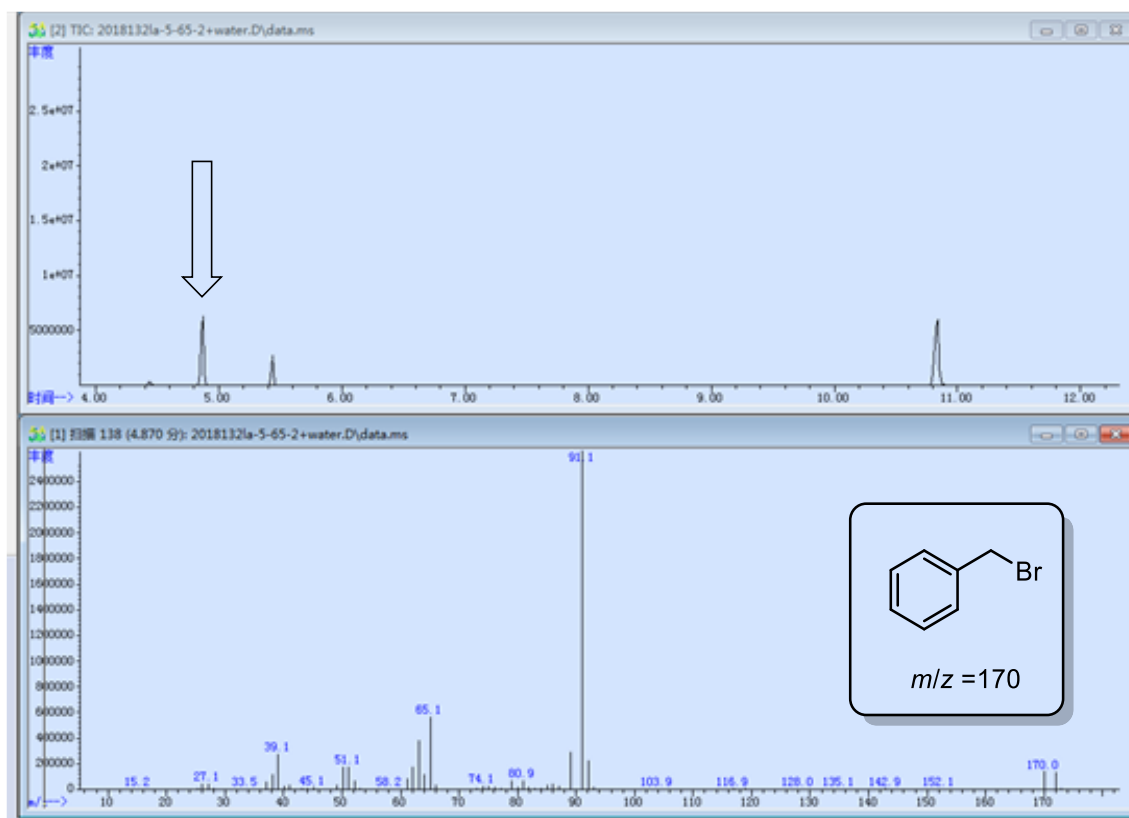

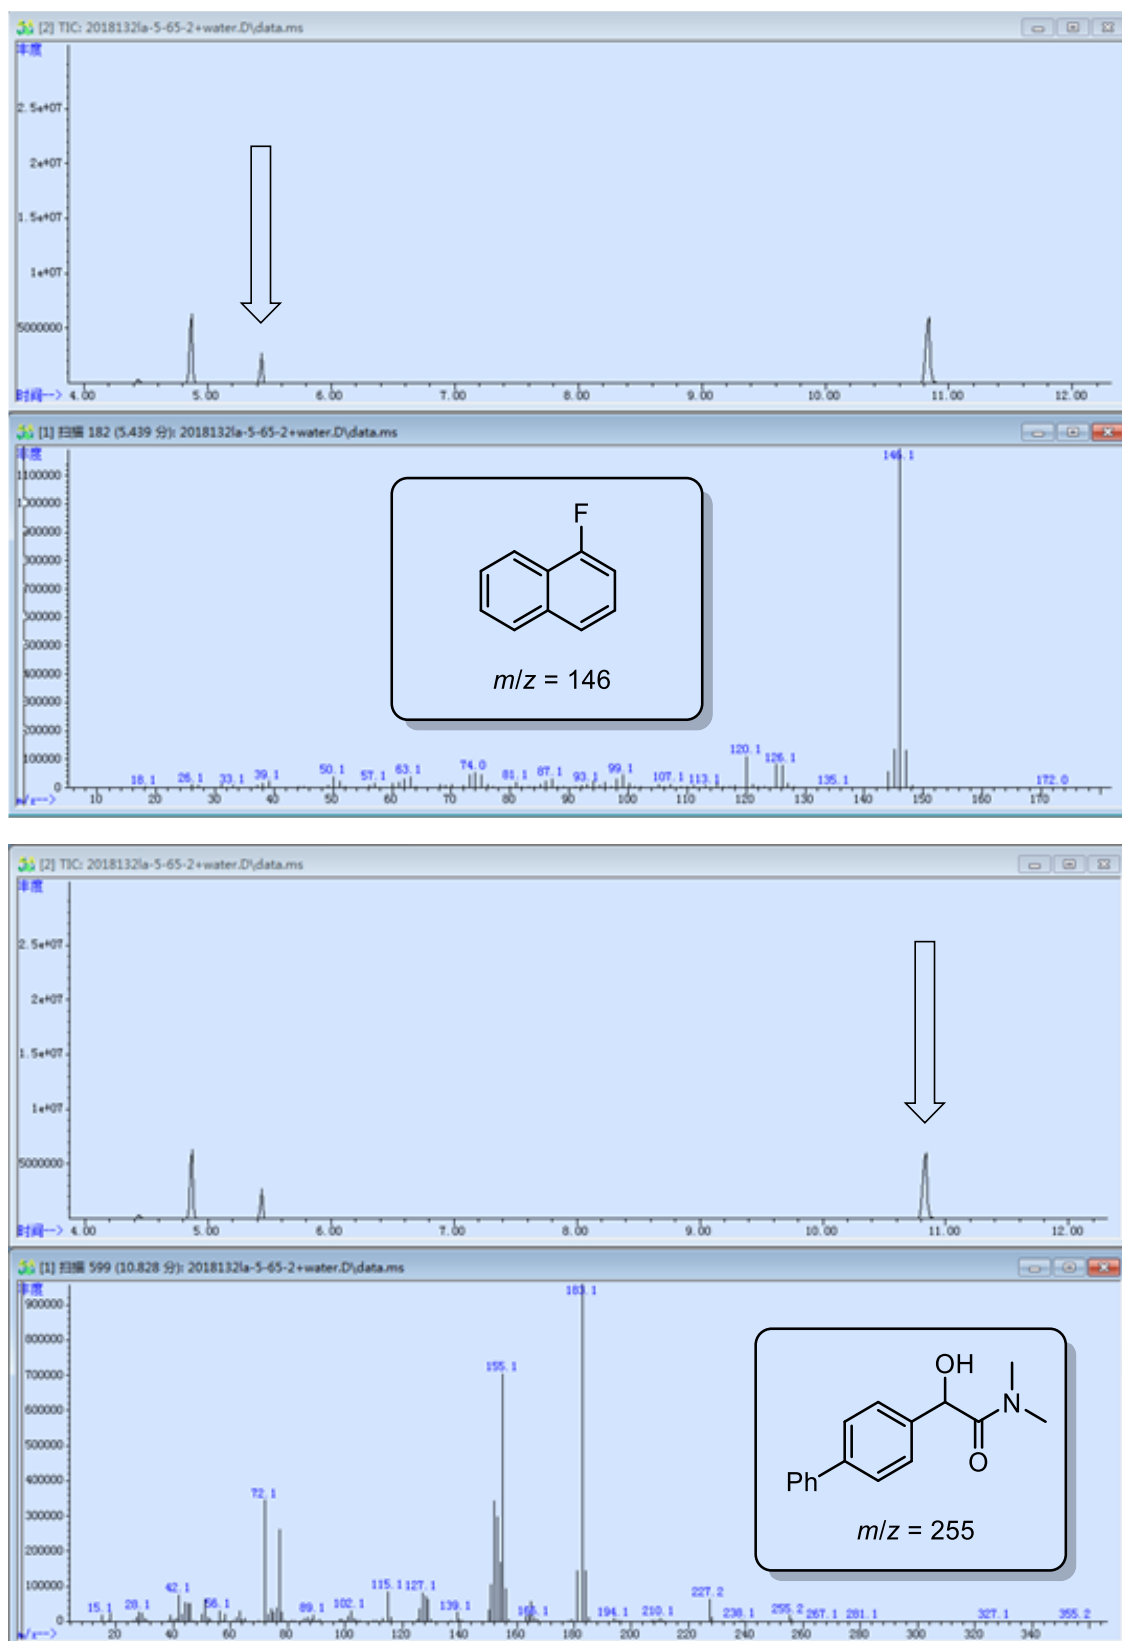

ii. The isolation of TMS-protected  $\alpha$ -hydroxyamide

TMS-protected  $\alpha$ -hydroxyamide (**46**) was successfully isolated when 2,2,2-

trifluoro-1-phenylethan-1-one was subject to the standard conditions.

### 3,3,3-Trifluoro-*N,N*-dimethyl-2-phenyl-2-((trimethylsilyloxy)propenamamide (46)

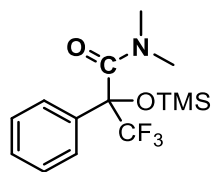

Pale yellow solid (121.5 mg, 76% yield).  $R_f = 0.2$  (petroleum ether/ethyl acetate = 5:1). M.p.: 91 – 93 °C.  $^1\text{H NMR}$  (400 MHz,  $\text{CDCl}_3$ )  $\delta$  7.58 – 7.44 (m, 2H), 7.43 – 7.30 (m, 3H), 2.92 (s, 3H), 2.61 (s, 3H), 0.26 (s, 9H);  $^{19}\text{F NMR}$  (376 MHz,  $\text{CDCl}_3$ )  $\delta$  -74.0 (s, 3F);  $^{13}\text{C NMR}$  (101 MHz,  $\text{CDCl}_3$ )  $\delta$  167.3, 135.7, 129.1, 128.4, 126.3, 123.5 (q,  $J = 286.7$  Hz), 81.5 (q,  $J = 26.6$  Hz), 37.7, 36.4, 0.8 ; **MS** (EI,  $m/z$ ): 319 [ $\text{M}^+$ ], 304, 247, 145, 105, 72; **HRMS** (FI,  $m/z$ ): exact mass calculated for [ $\text{M}$ ] $^+$  ( $\text{C}_{14}\text{H}_{20}\text{O}_2\text{NF}_3\text{Si}$ ) requires  $m/z$  319.1210, found  $m/z$  319.1216; **IR (film)**: 3353, 2957, 1660, 1495, 1450, 1395, 1256, 1192, 1157, 1135, 1006, 955, 880, 846, 763, 714  $\text{cm}^{-1}$ .

## 7 Procedures for the synthesis of substrates

$\text{TMSCFCI}_2^3$ ,  $\text{TMSCFCIBr}_2^3$ ,  $\text{TMSCCl}_2\text{Br}^4$  and benzylamines<sup>5</sup> were prepared by the reported methods.

## 8 References

- 1 K. A. Mix, J. E. Lomax and R. T. Raines, Cytosolic Delivery of Proteins by Bioreversible Esterification. *J. Am. Chem. Soc.* 2017, **139**, 14396.
- 2 B. Bánhidai and U. Schöllkopf, (Dimethylcarbamoyl)lithium from Dimethylformamide and Lithium Diisopropylamide; Synthesis of  $\alpha$ -Hydroxy *N,N*-Dimethylcarboxyamides. *Angew. Chem. Int. Ed.* 1973, **12**, 836.
- 3 D. Chen, Z. Fan, L. Huang, K. Gao, P. Xiao, C. Ni and J. Hu,  $\text{TMSCFX}_2$  ( $\text{X} = \text{Cl}, \text{Br}$ ) as halofluorocarbene sources for the synthesis of halofluorocyclopropanes. *Chem. Commun.*, 2021, **57**, 319.
- 4 D. S. Lee, M. J. Duran-Pena, L. Burroughs and S. Woodward, Efficient Preparation of  $\text{TMSCCl}_2\text{Br}$  and Its Use in Dichlorocyclopropanation of Electron-Deficient Alkenes. *Chem. Eur. J.*, 2016, **22**, 7609.

5 A. Liu, C. Ni, Q. Xie and J. Hu, TMSF<sub>2</sub>Br-Enabled Fluorination-Aminocarbonylation of Aldehydes: Modular Access to alpha-Fluoroamides. *Angew. Chem. Int. Ed.*, 2022, **61**, e202115467.

**9 <sup>1</sup>H, <sup>19</sup>F and <sup>13</sup>C NMR spectra of products**

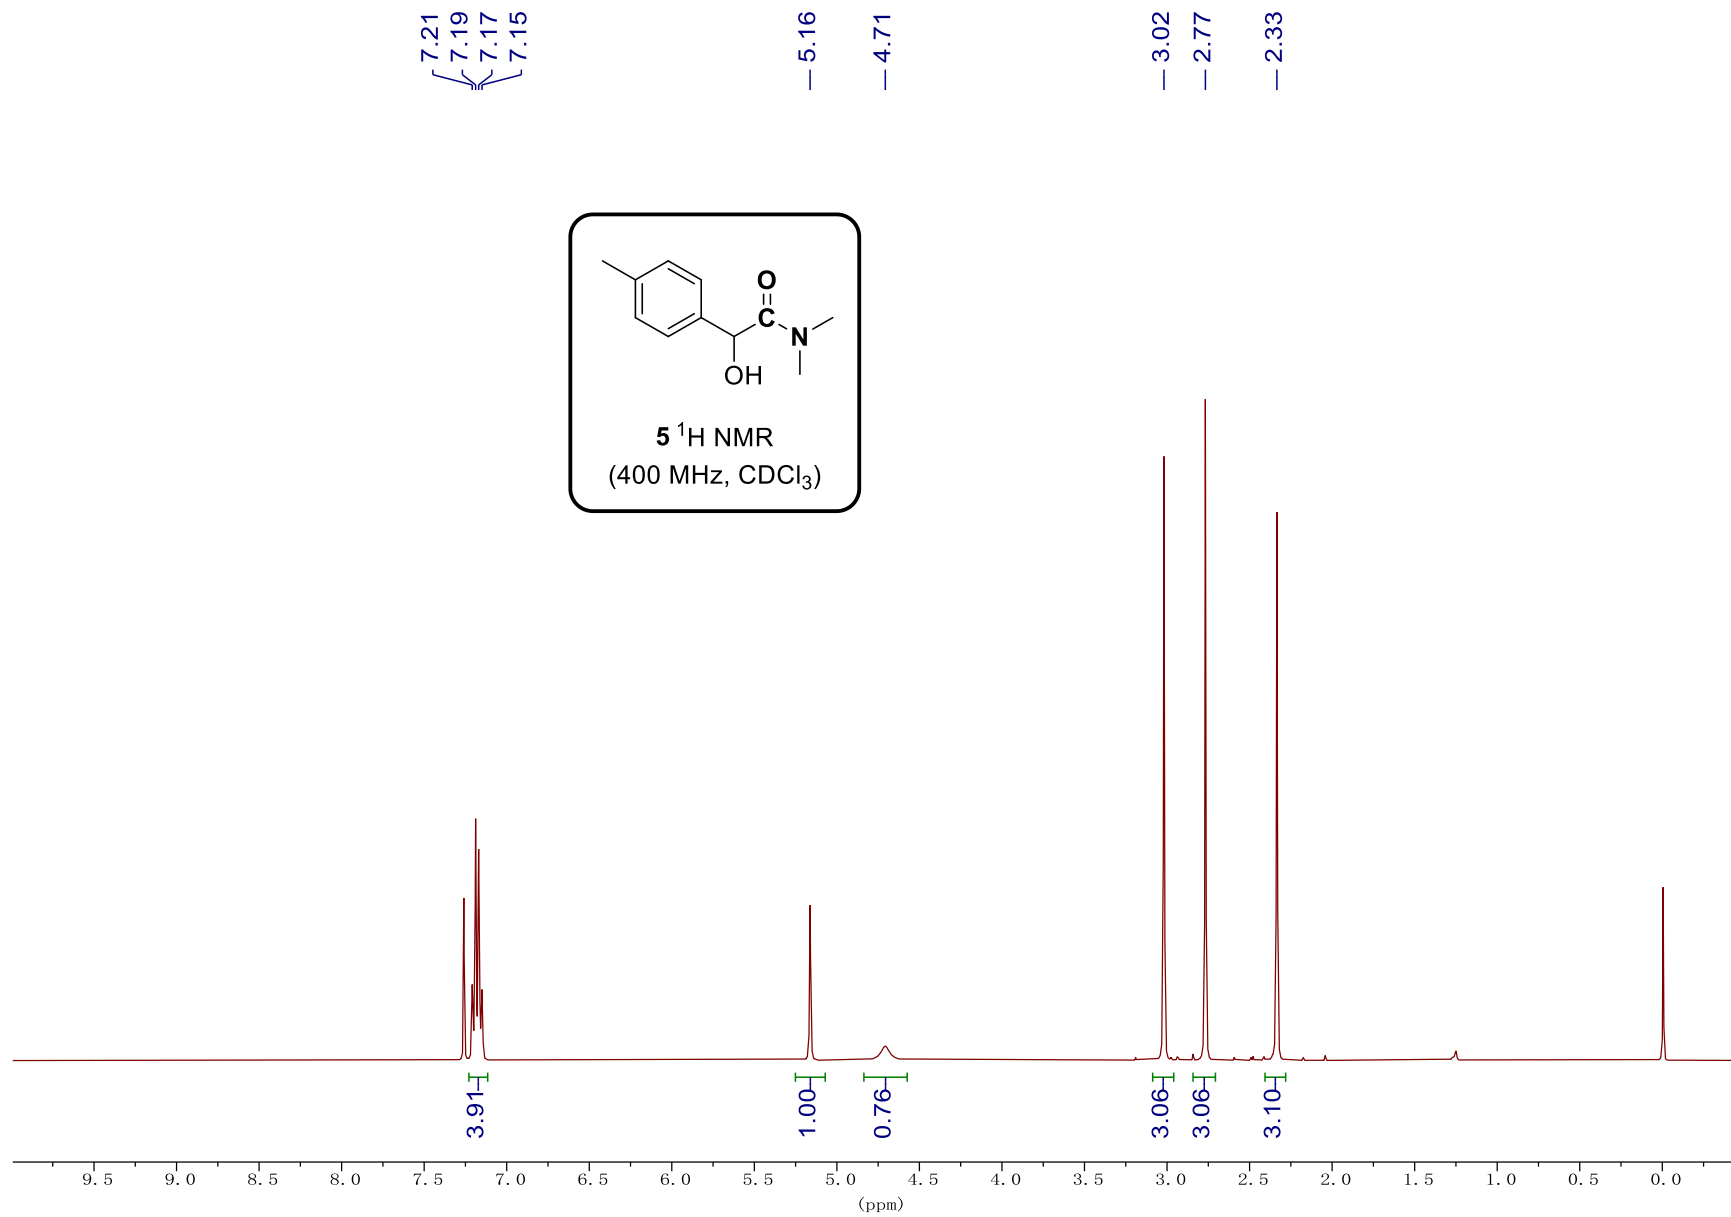

— 172.64

~ 138.38  
~ 136.33  
~ 129.76  
~ 127.46

{ 77.48  
77.16  
76.84  
71.41

{ 36.51  
36.34

— 21.27

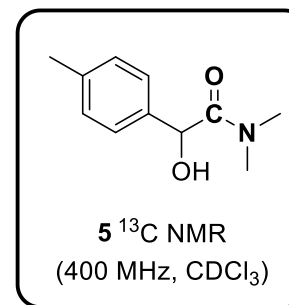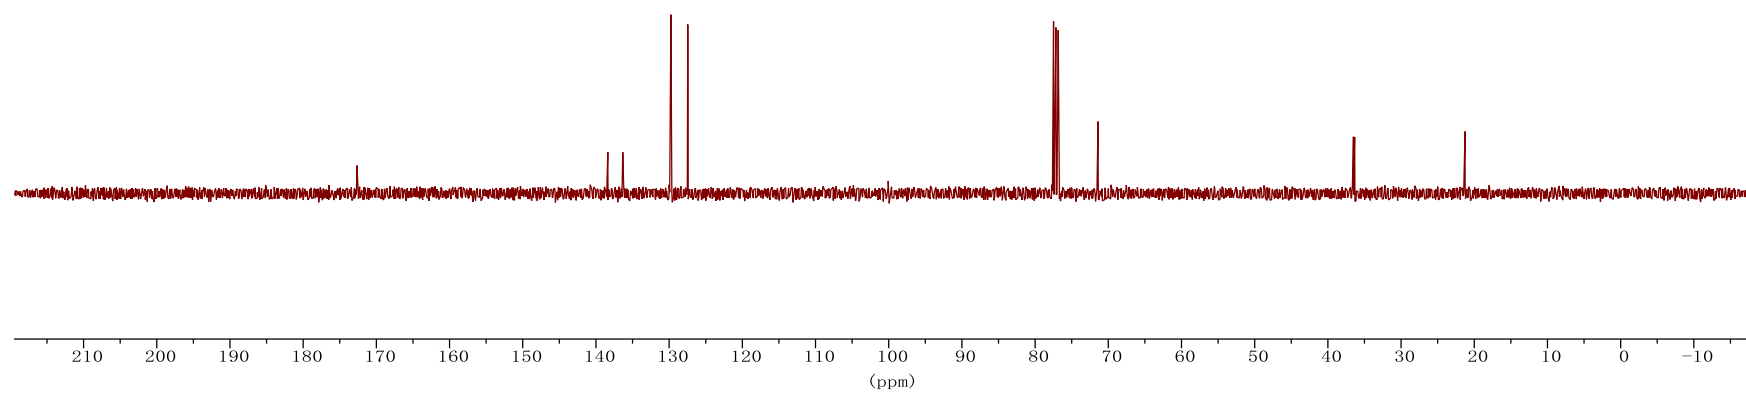

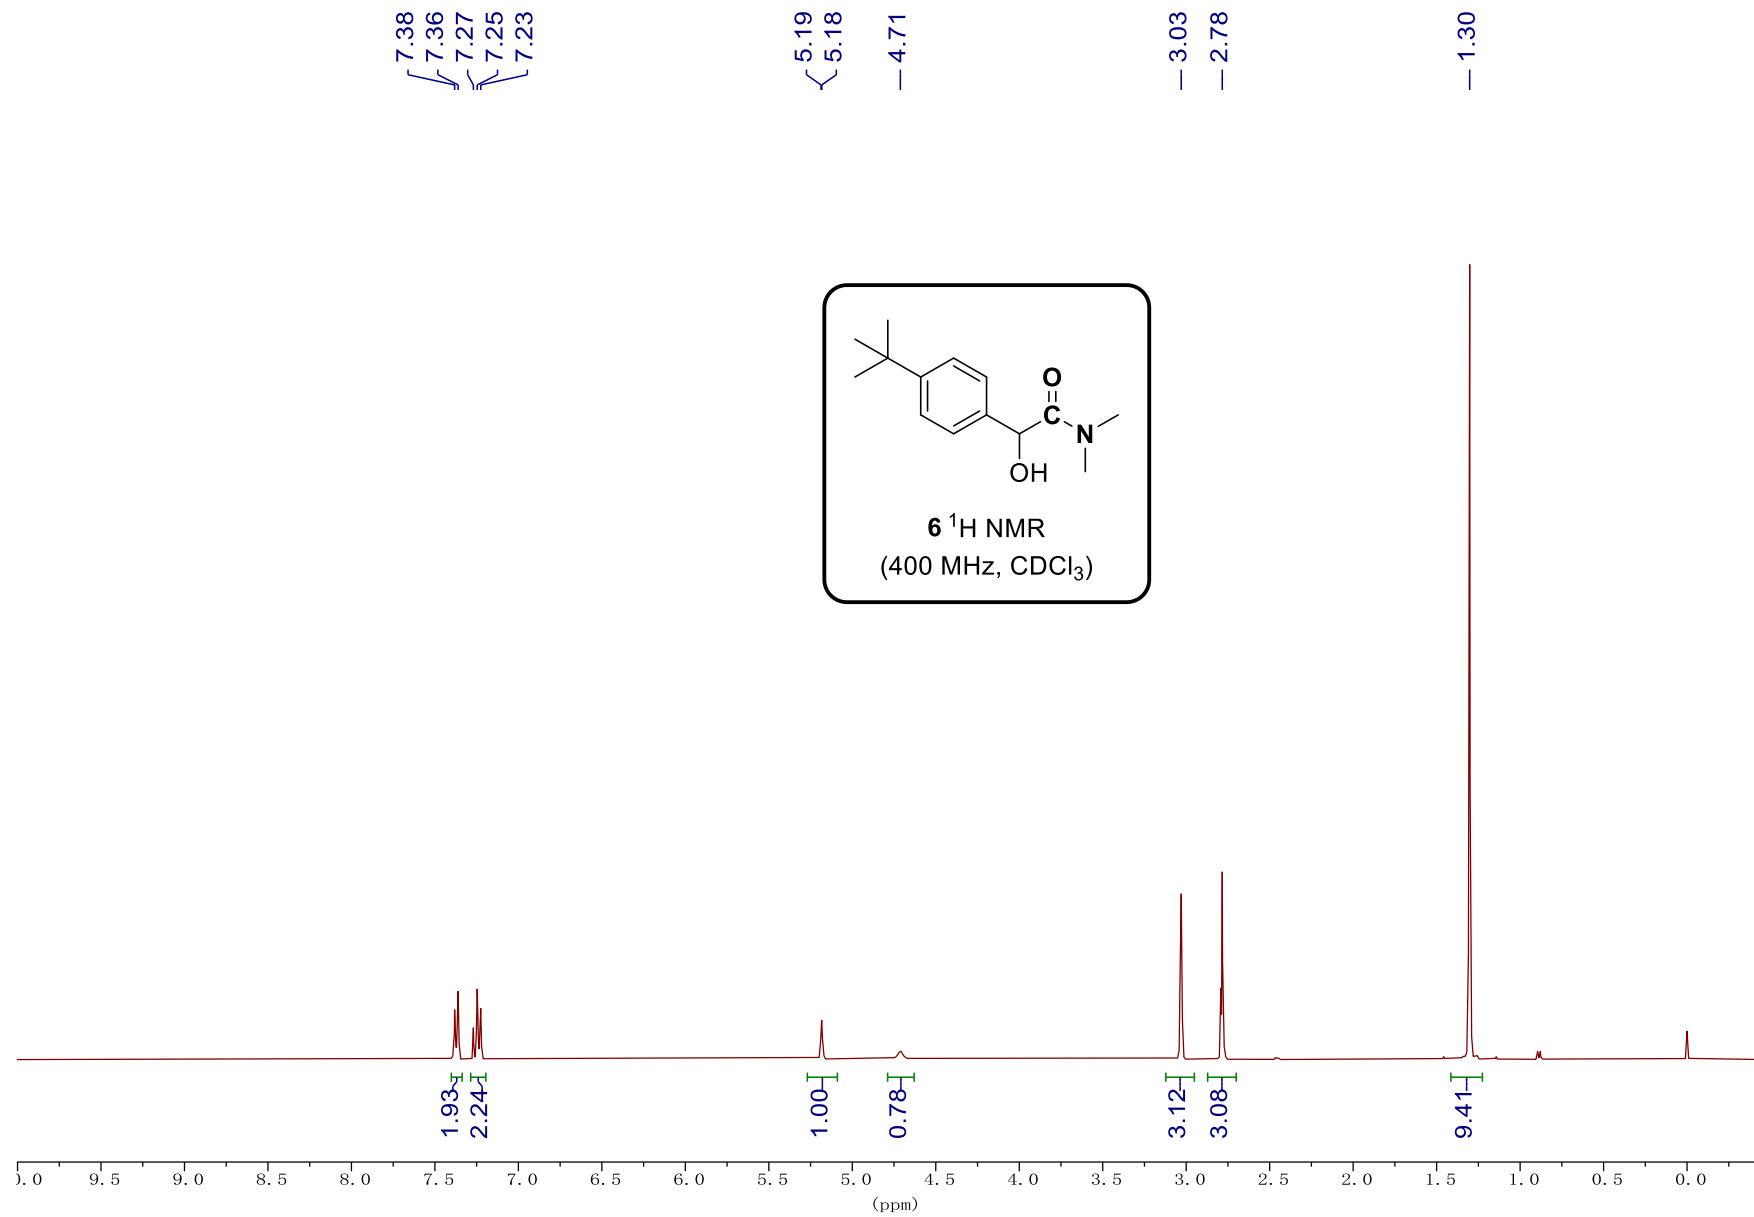



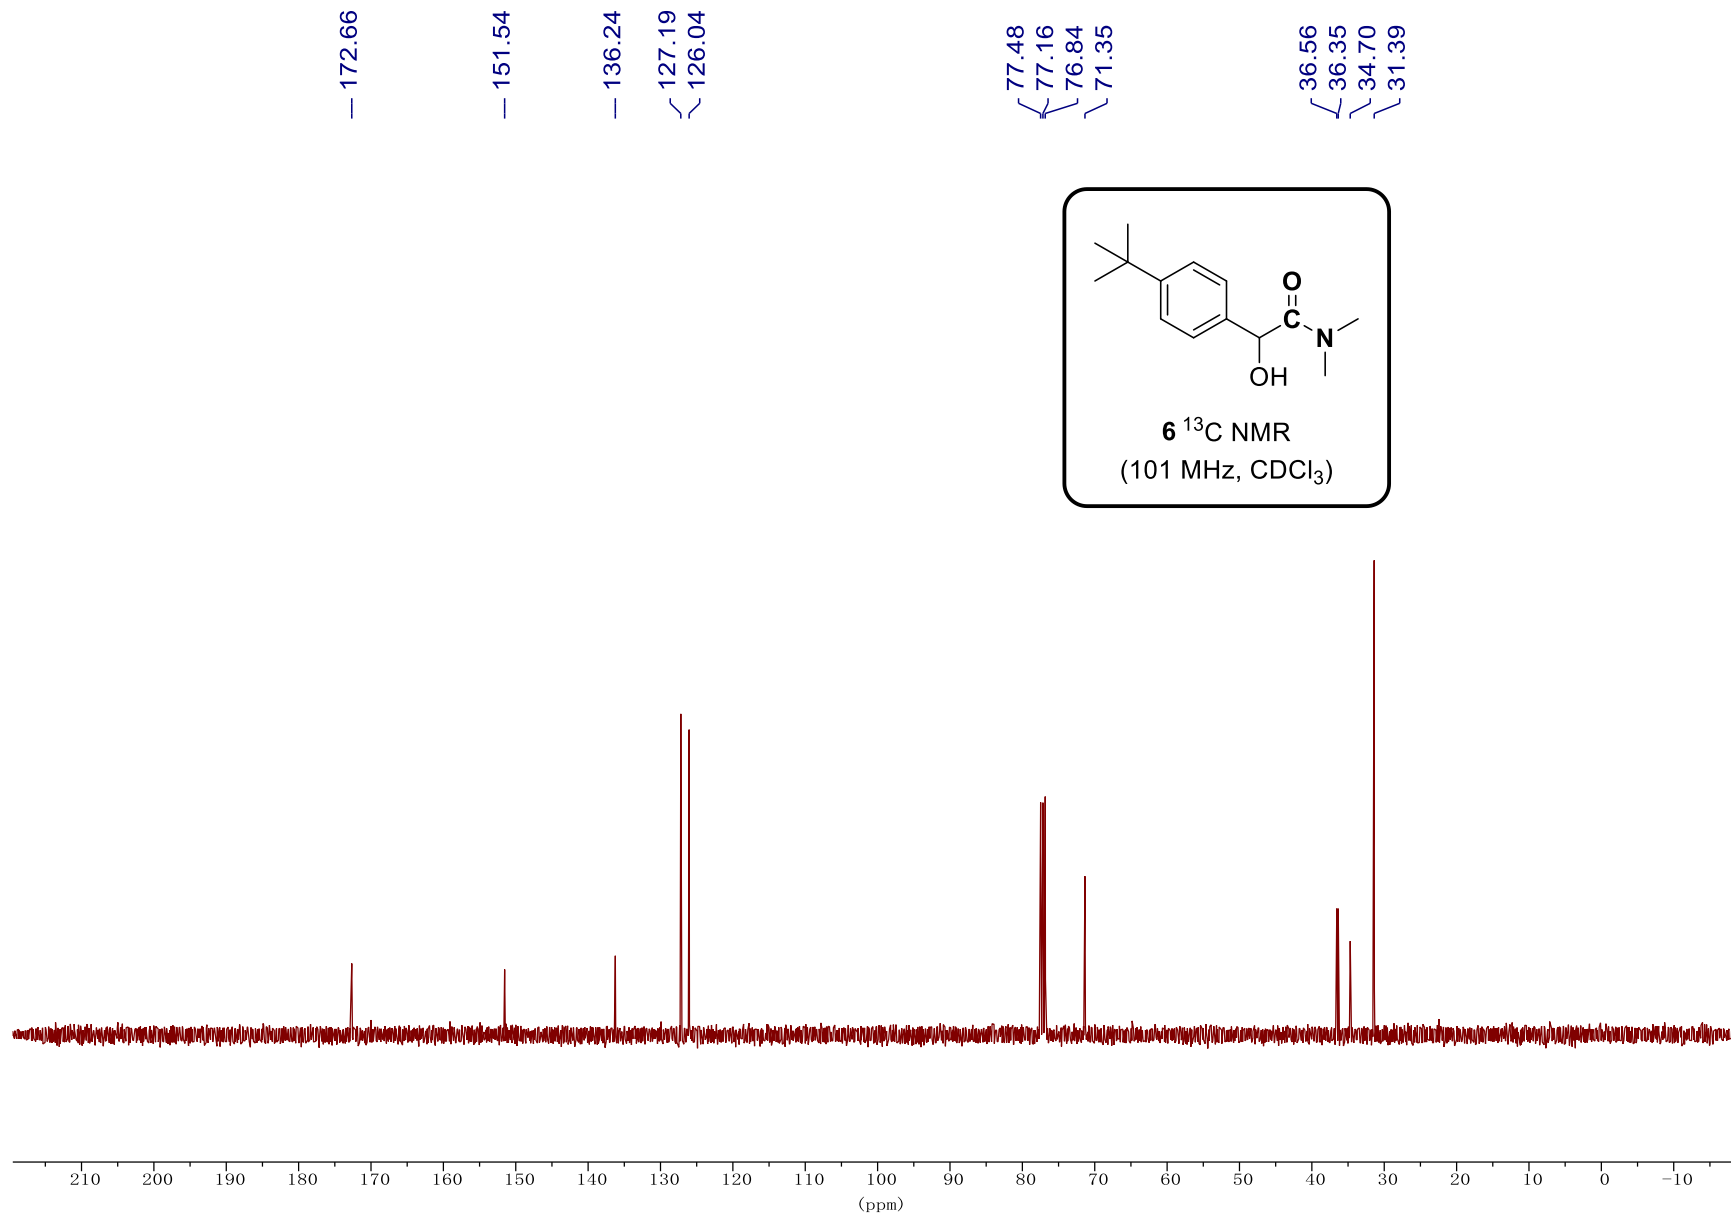

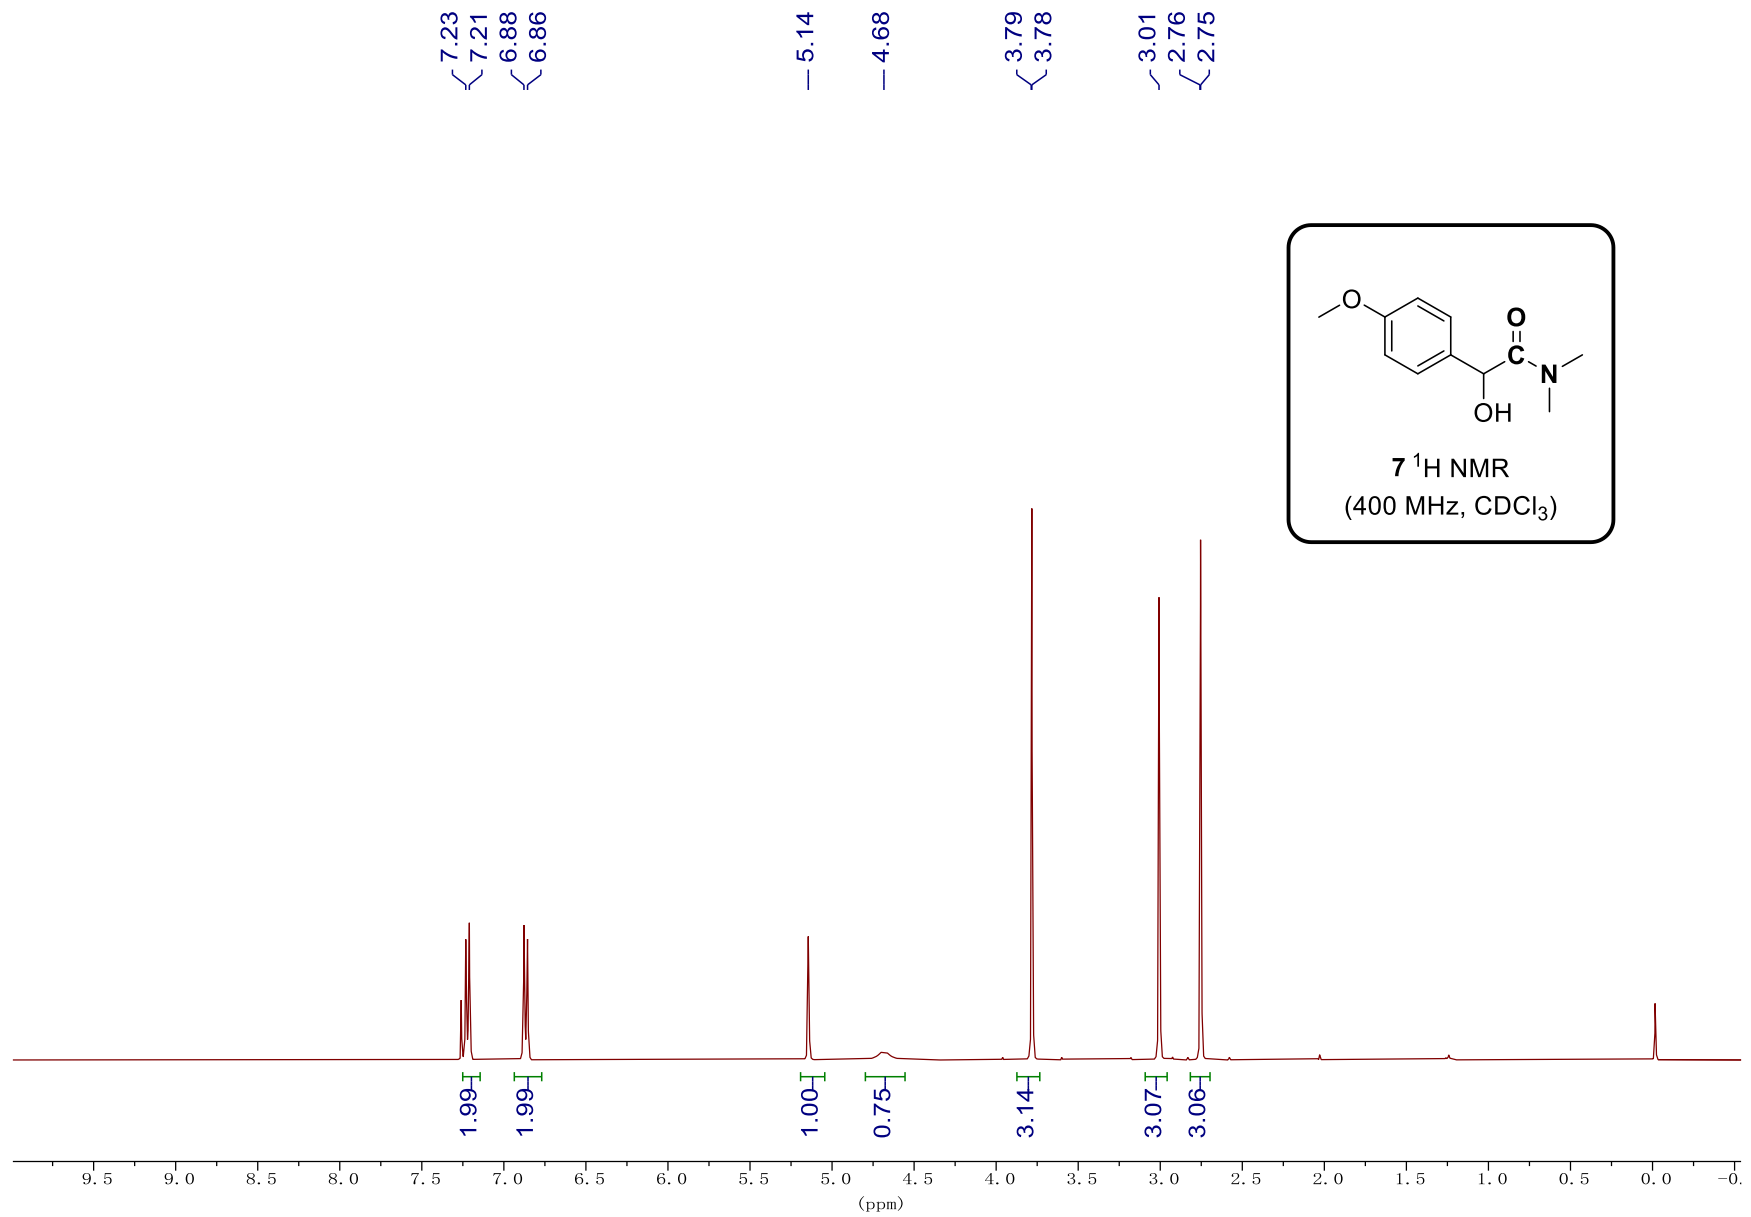

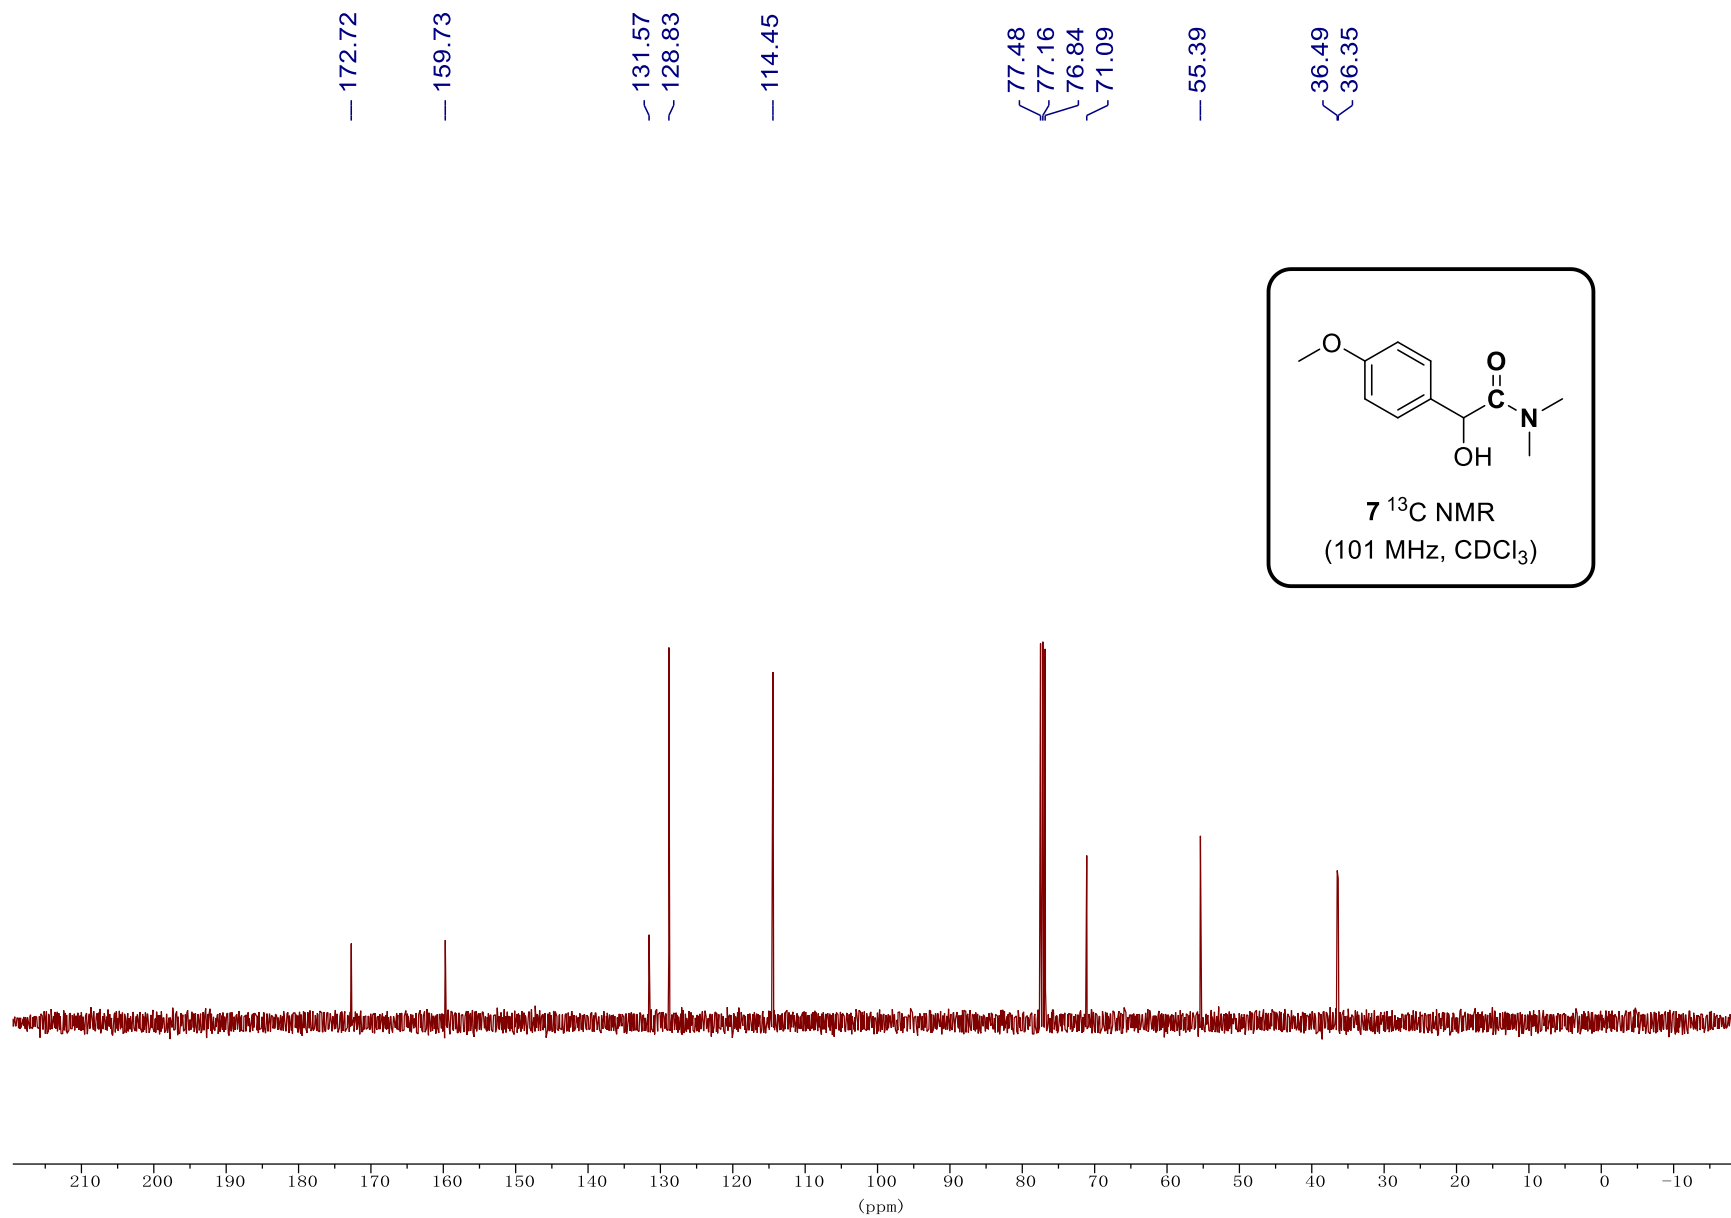

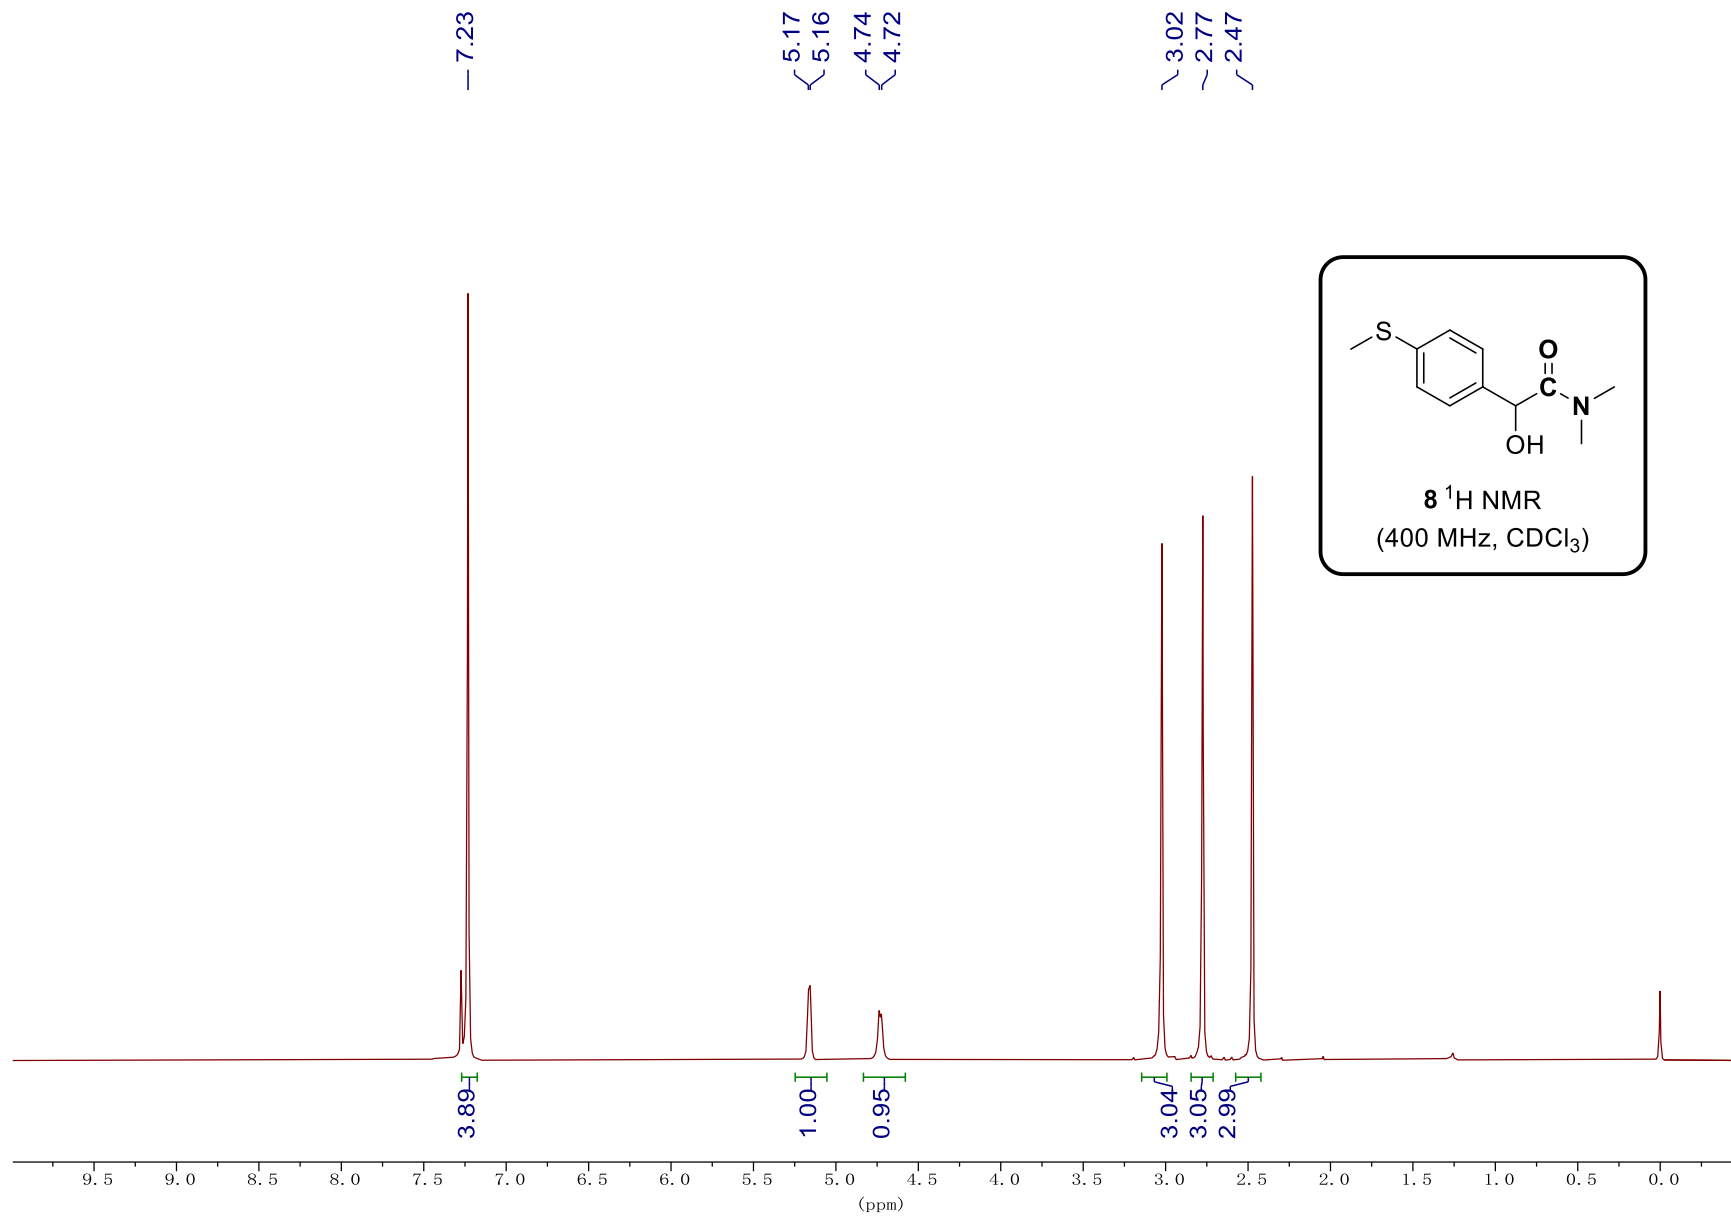

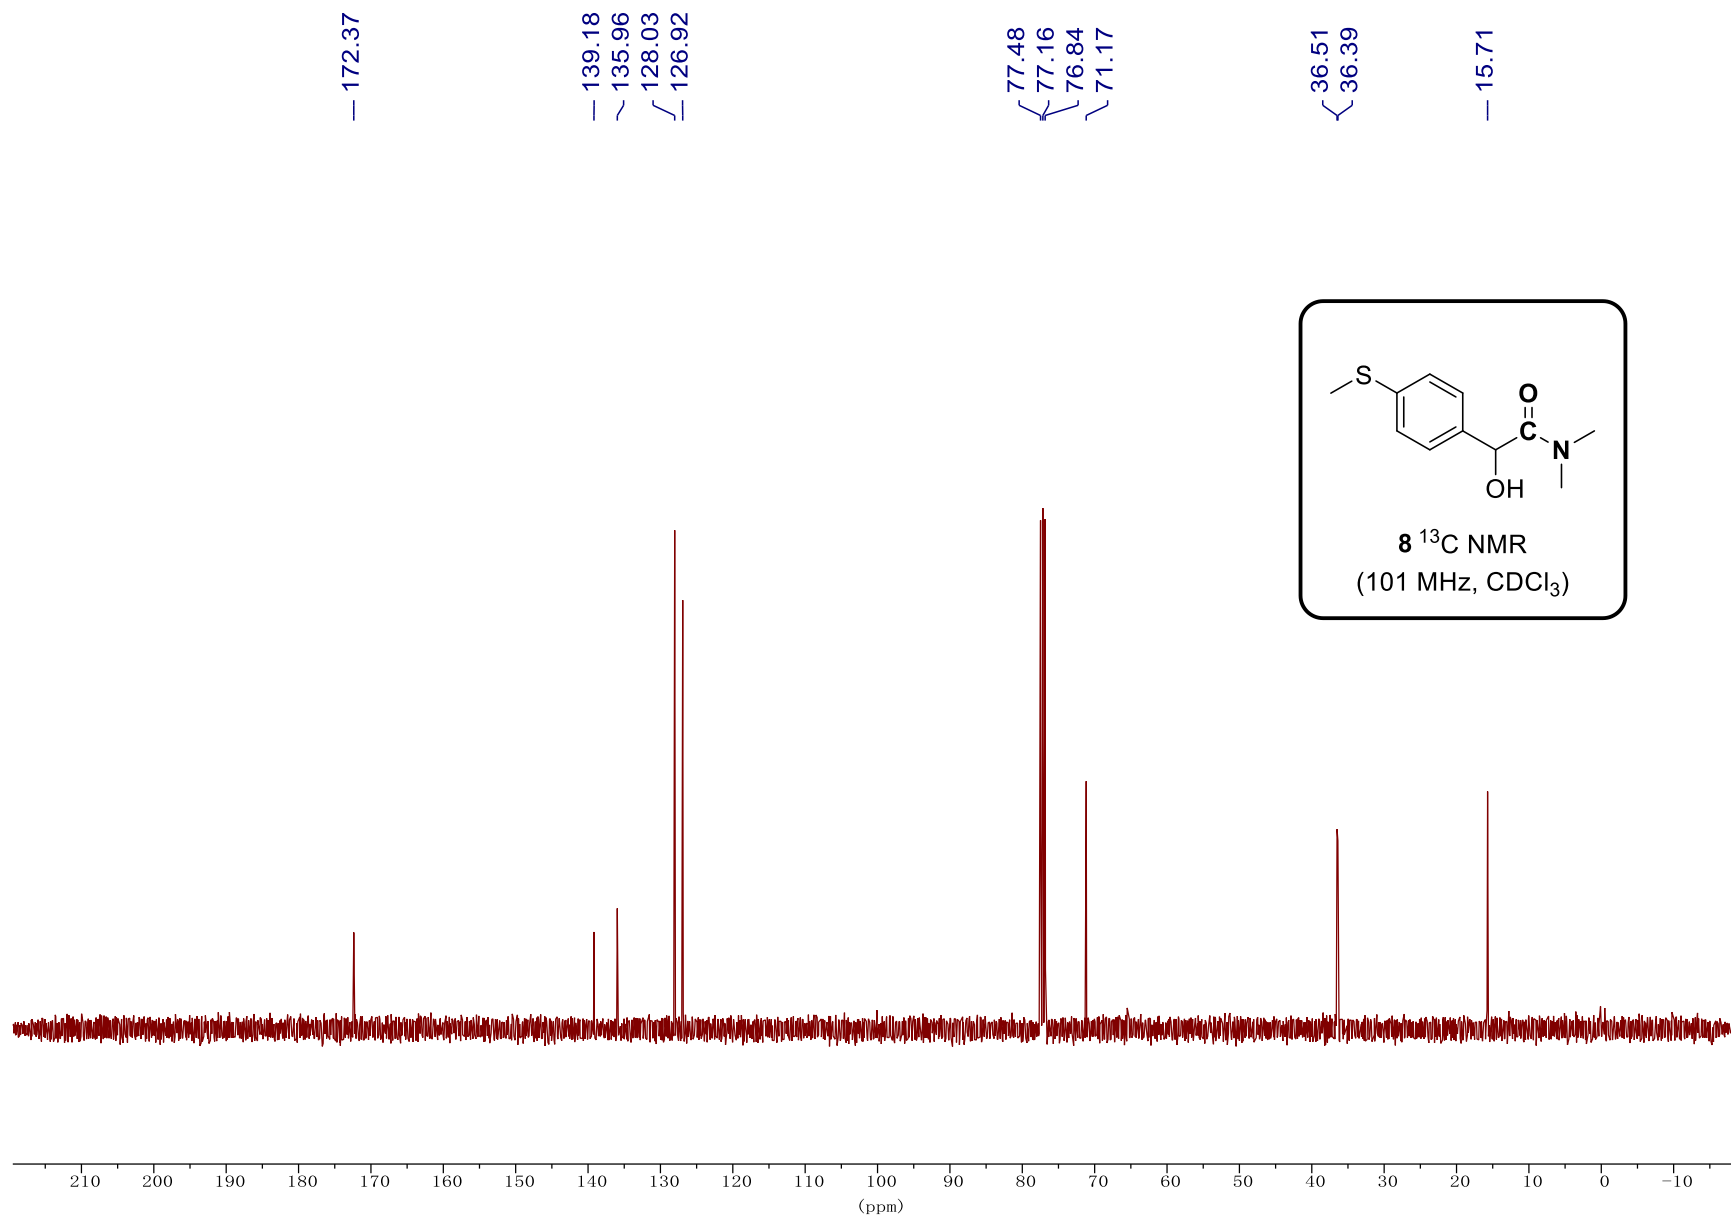

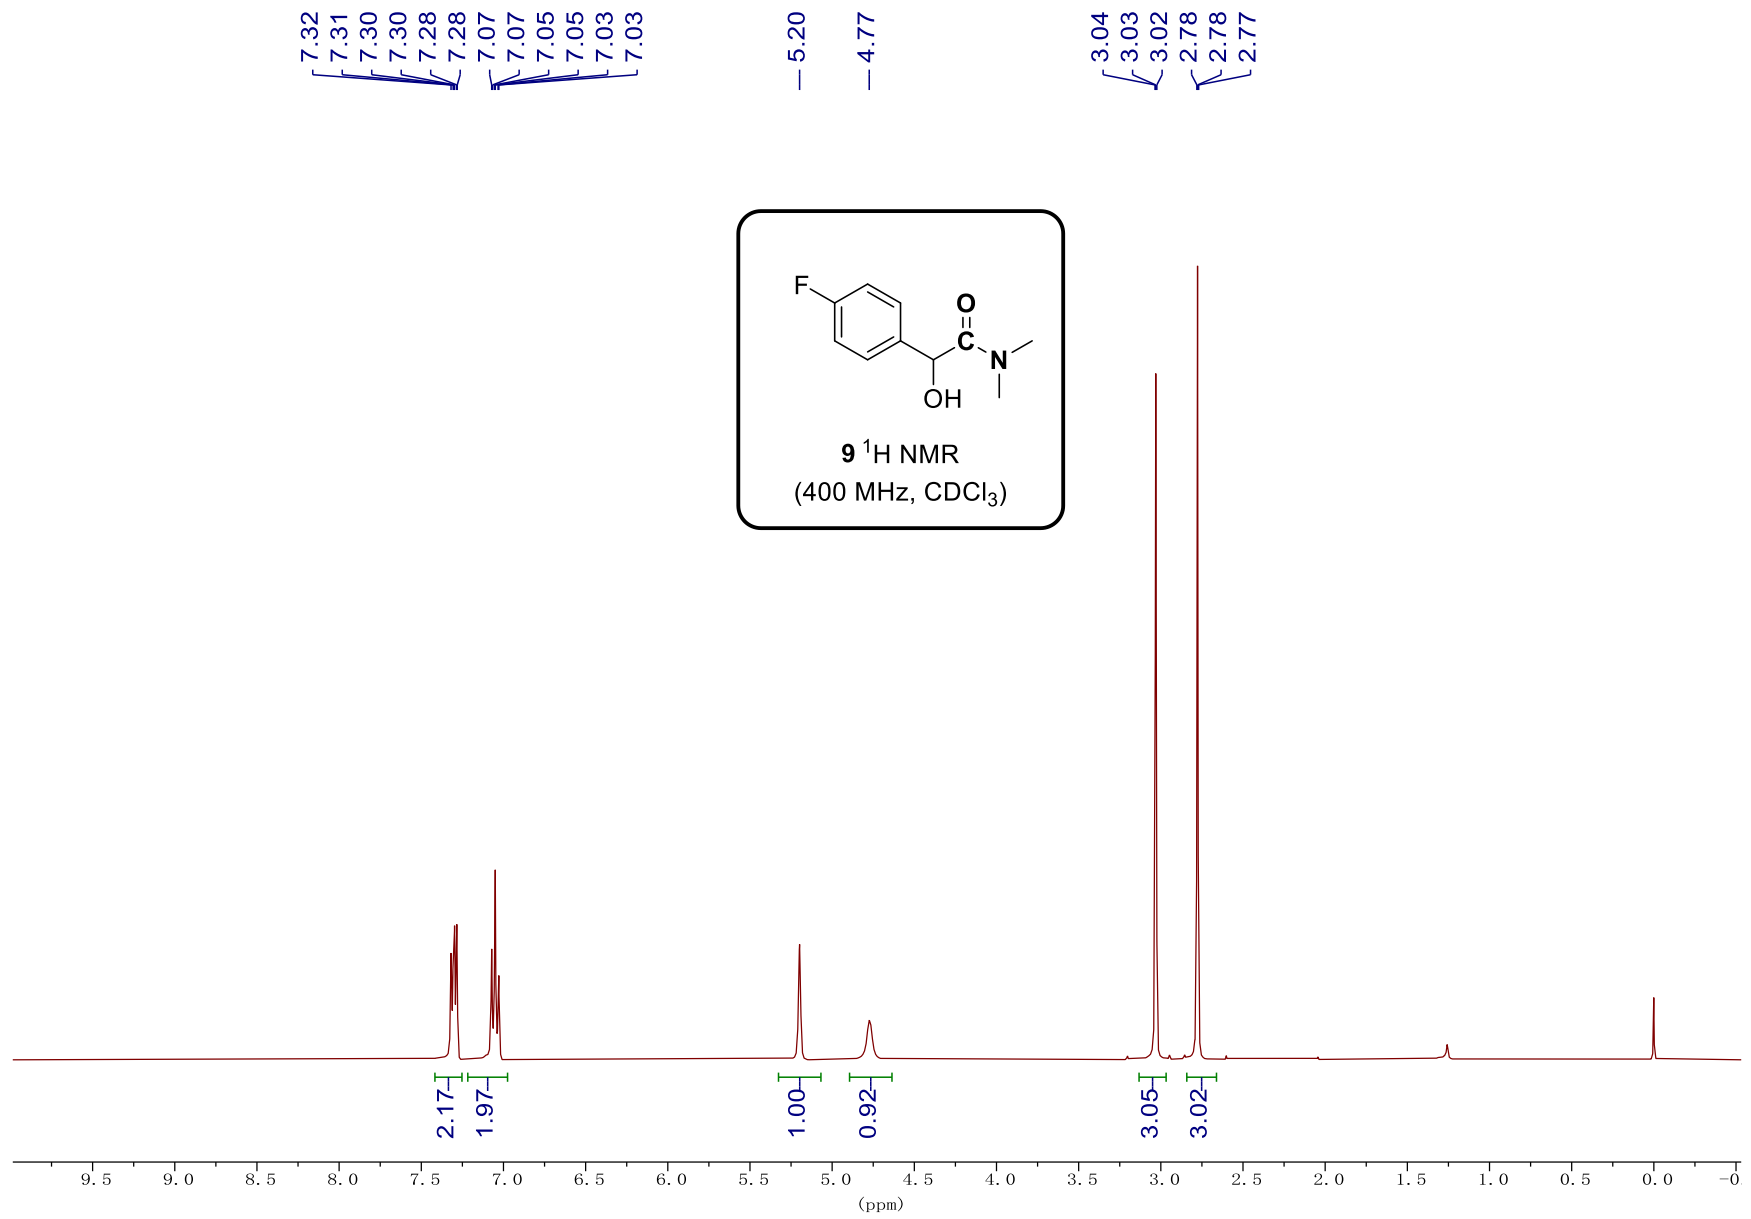

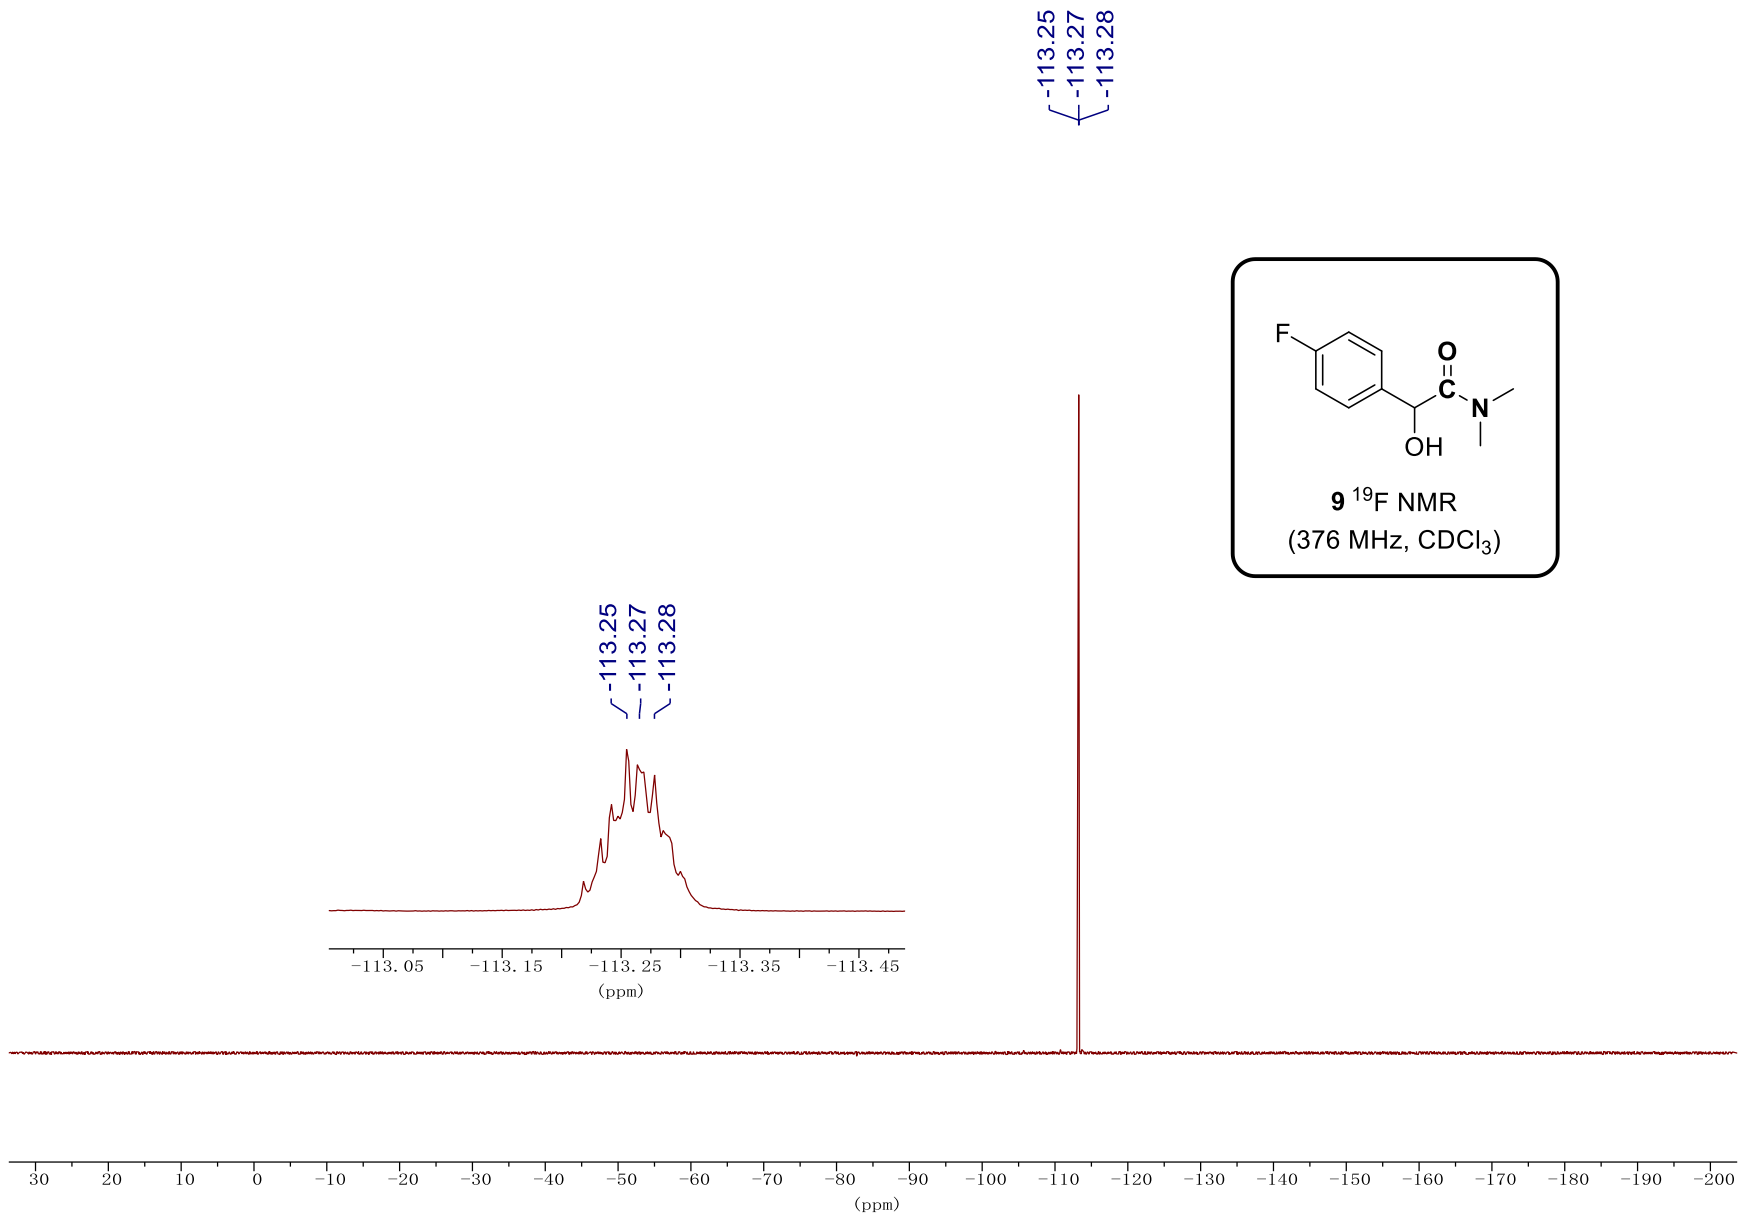

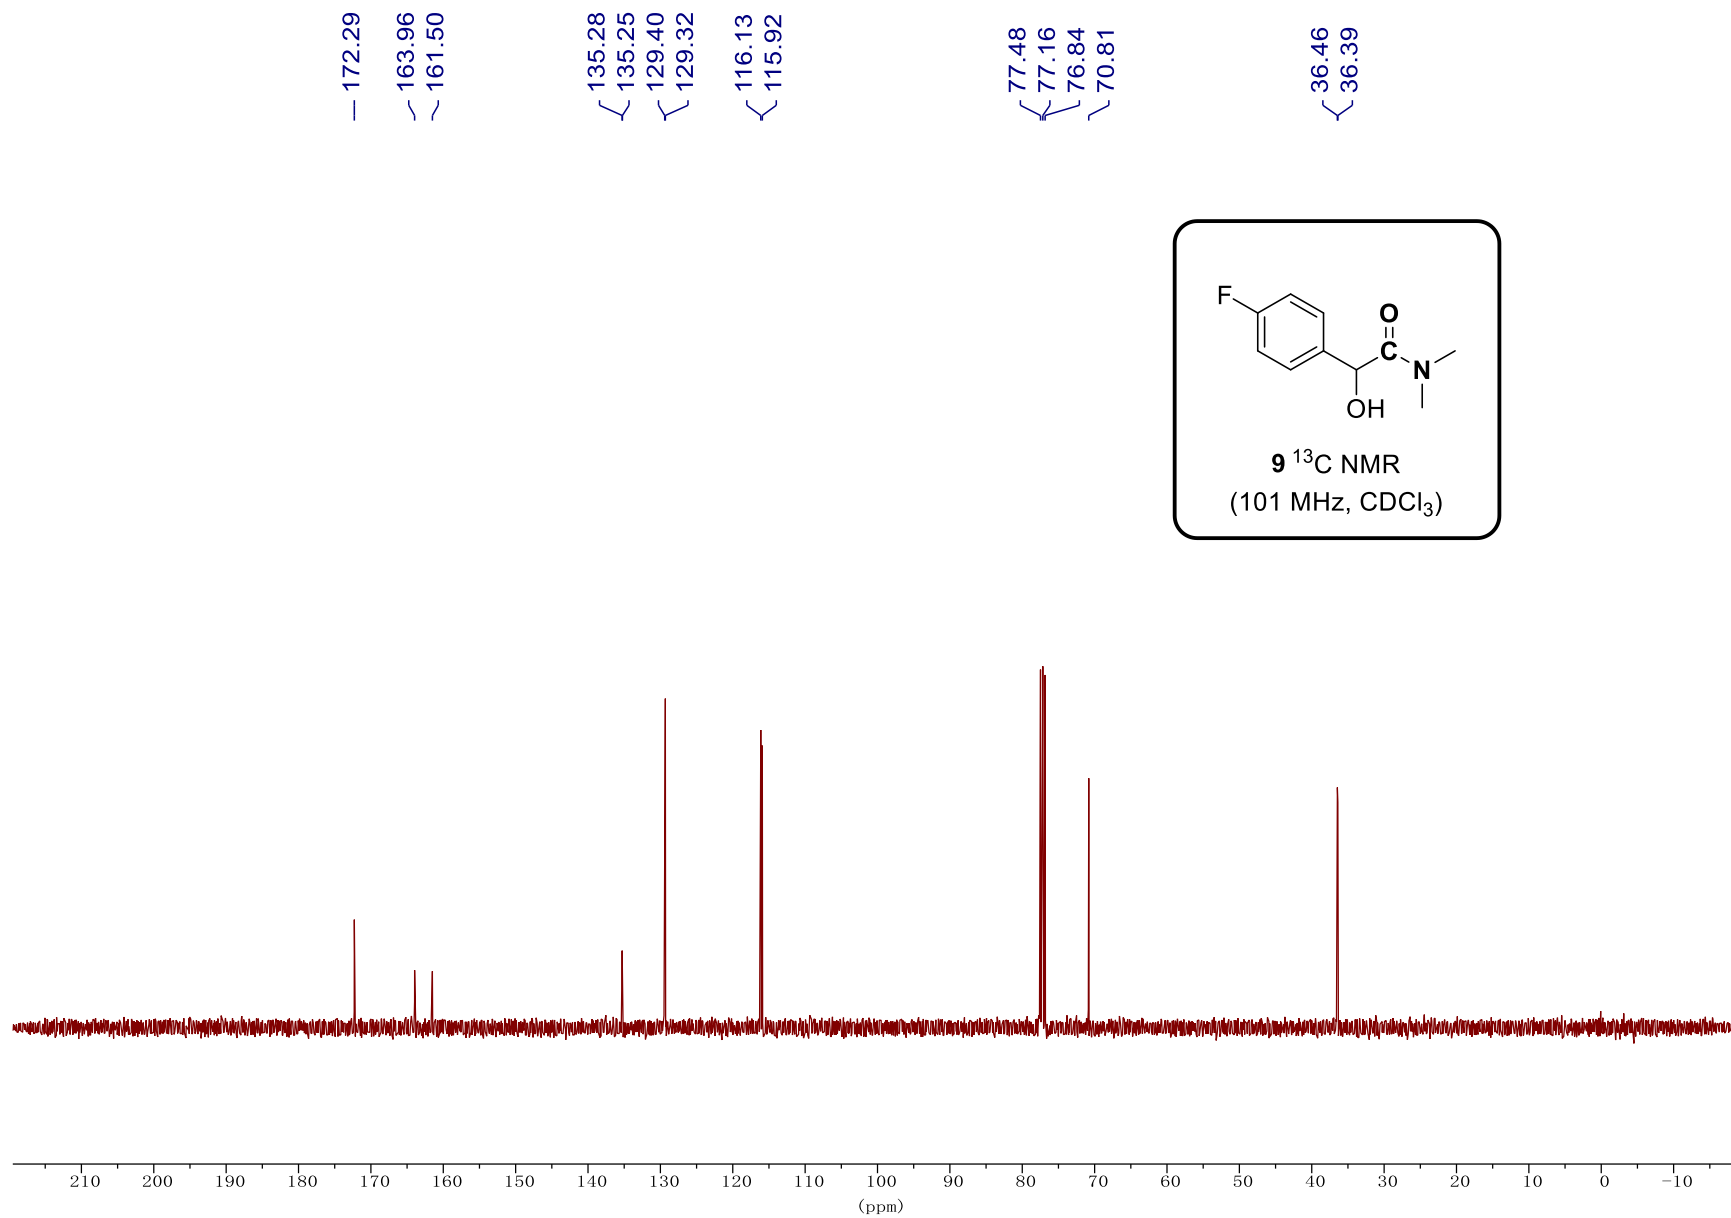



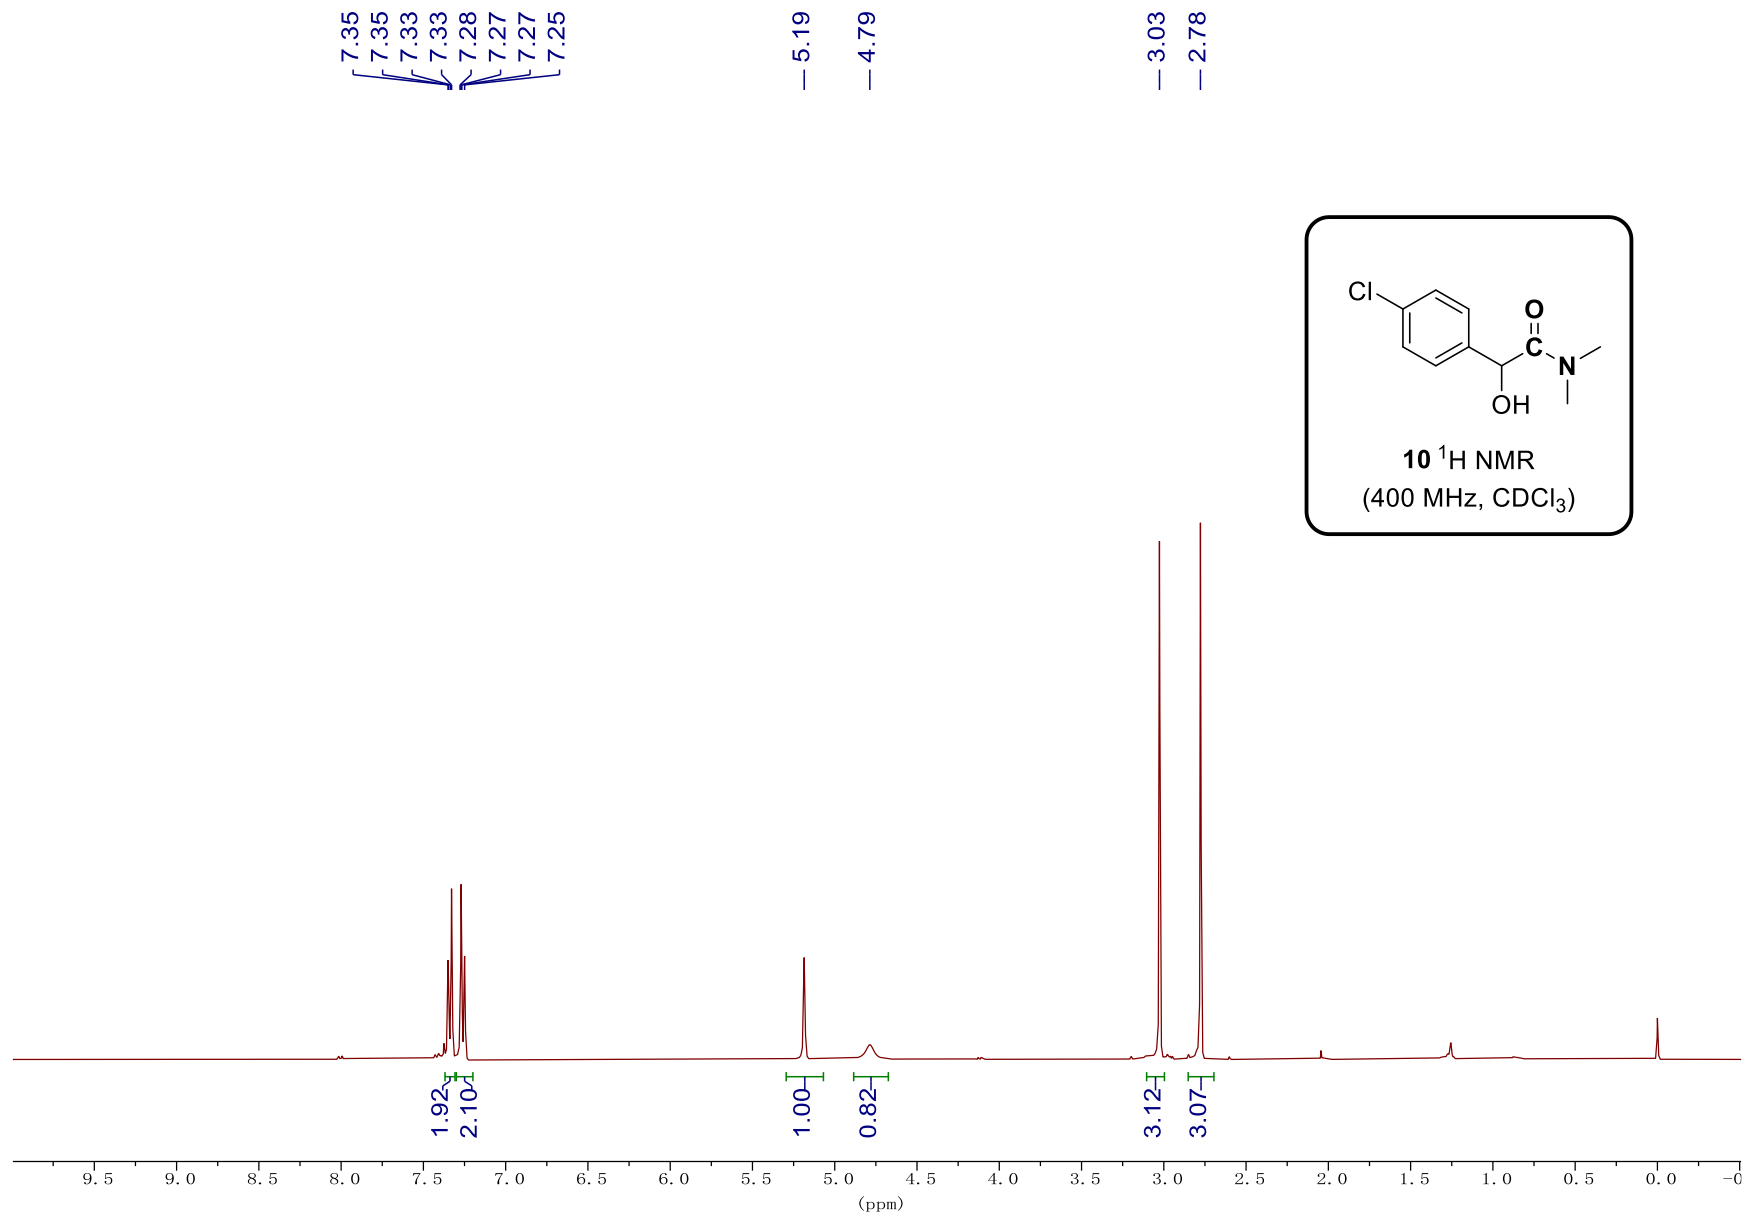

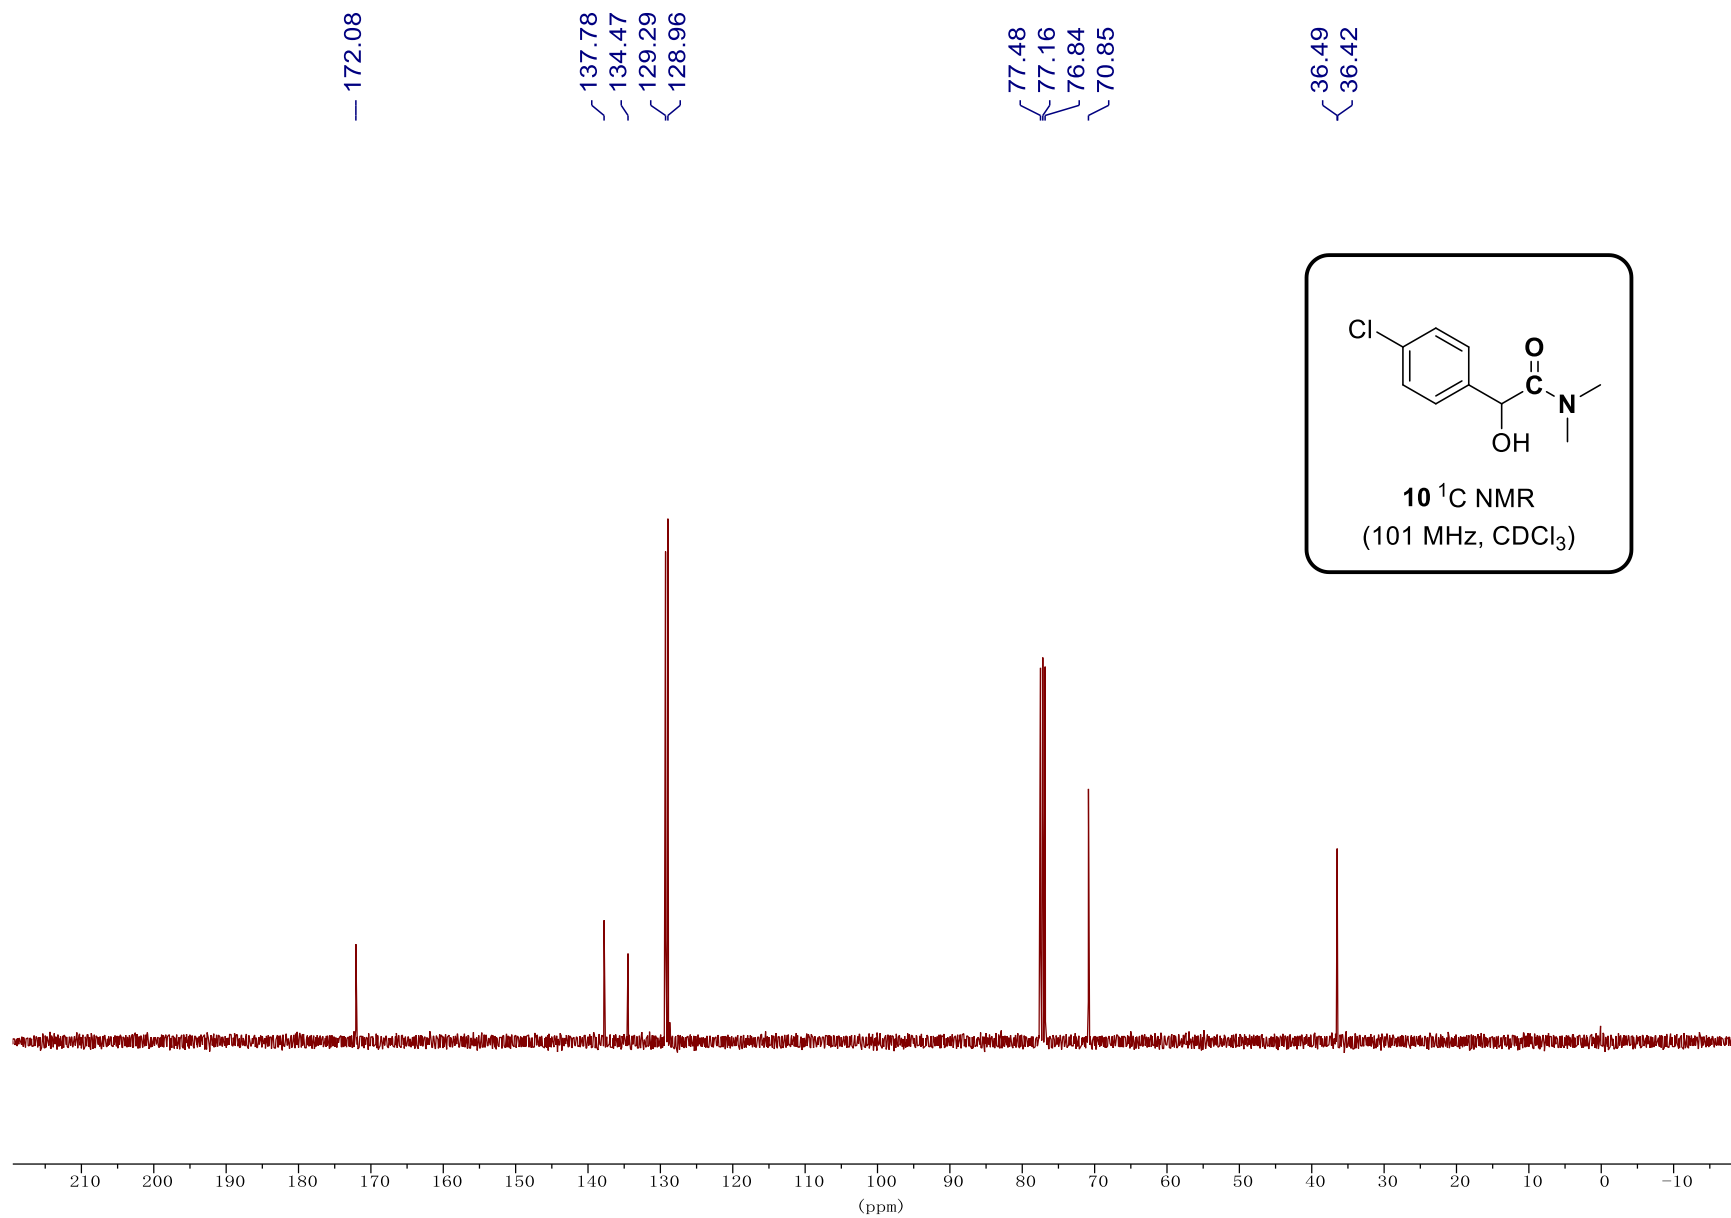

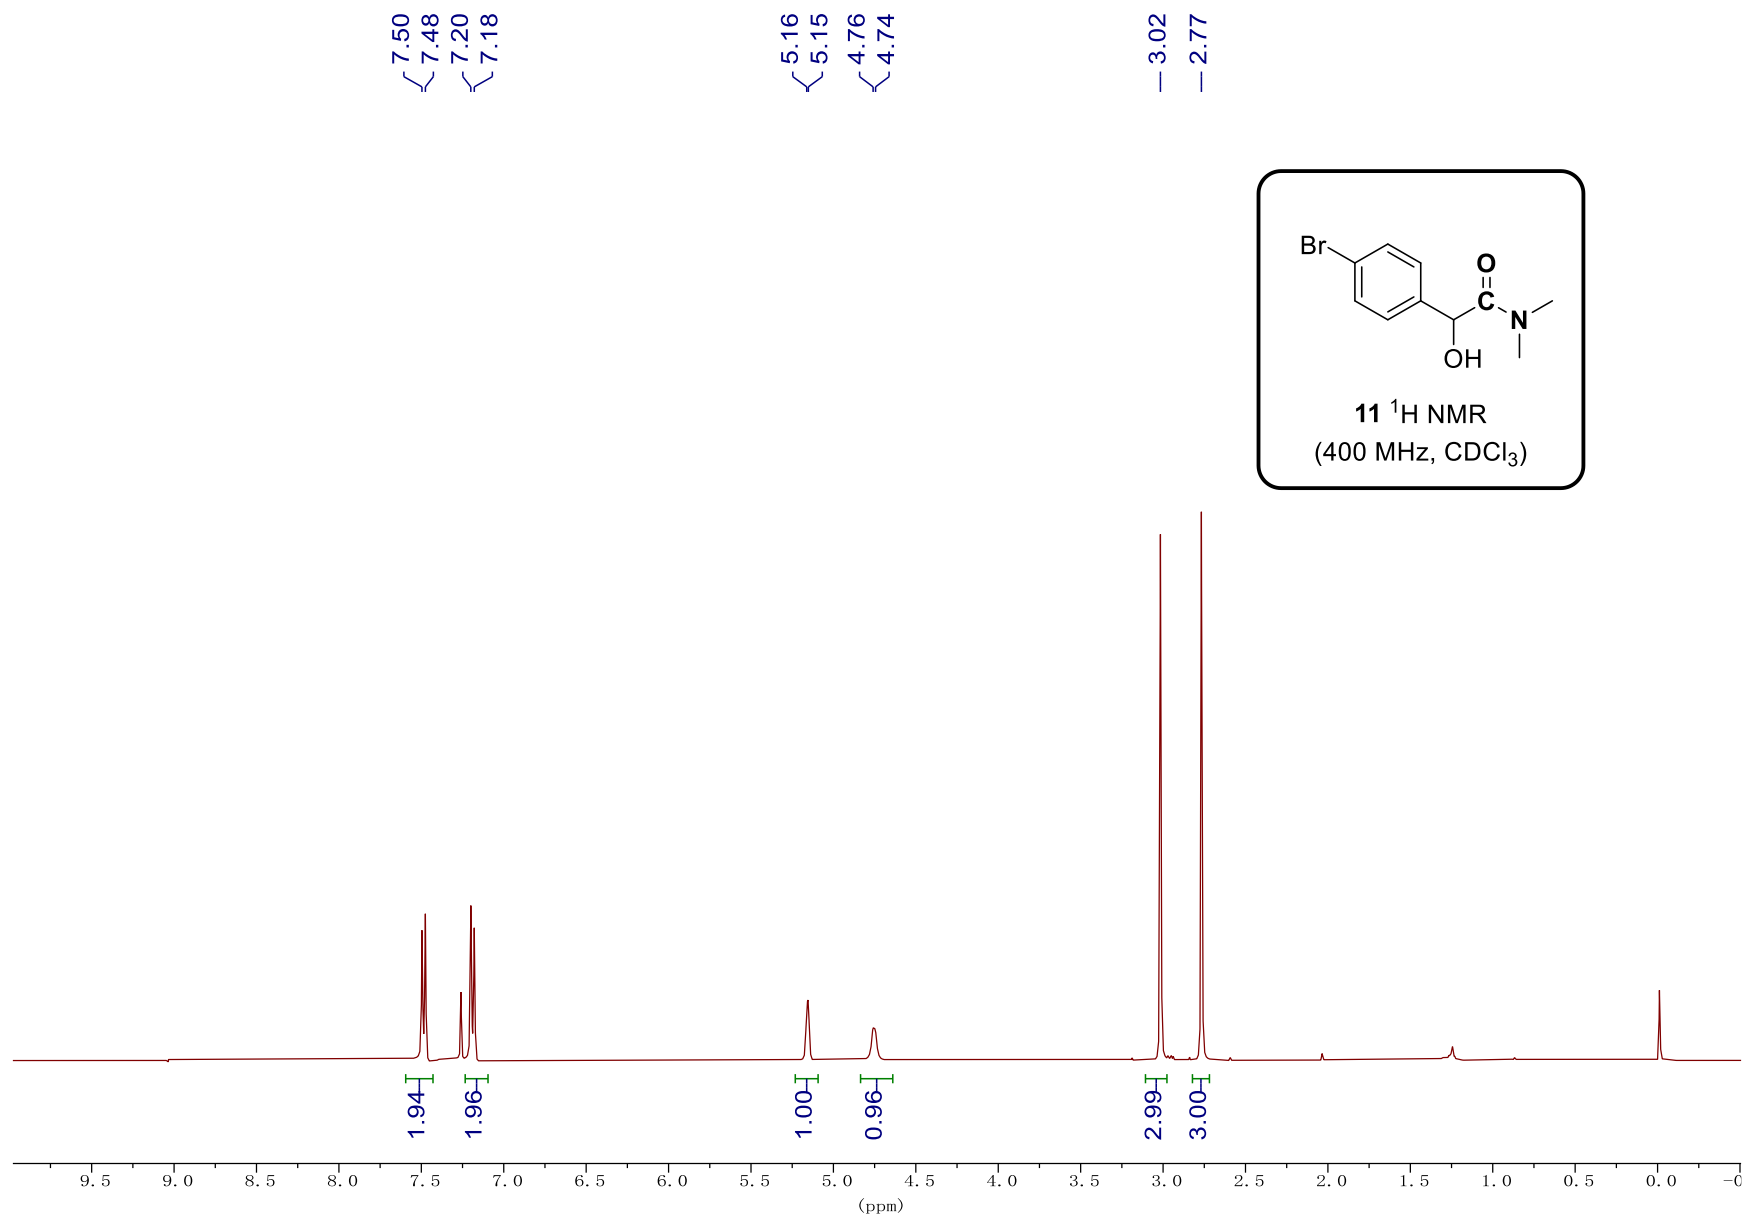

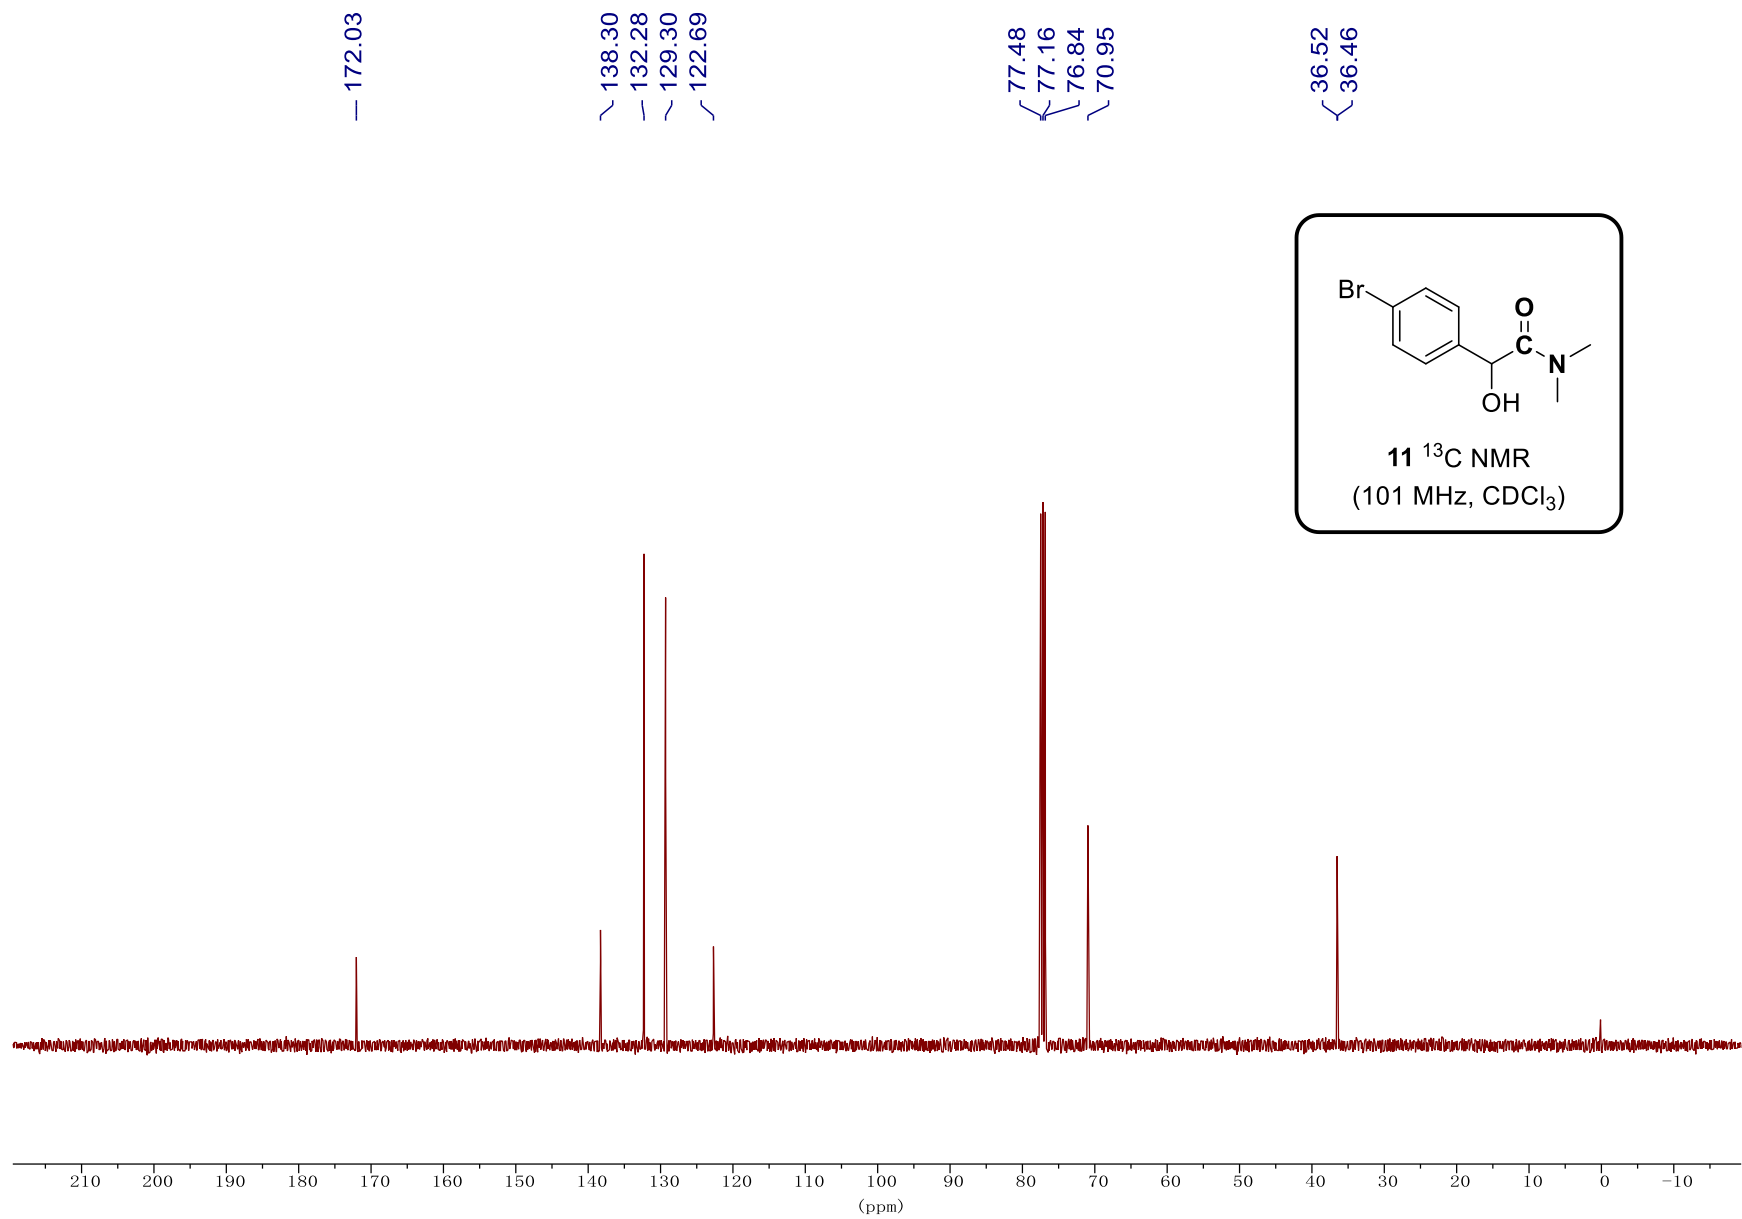

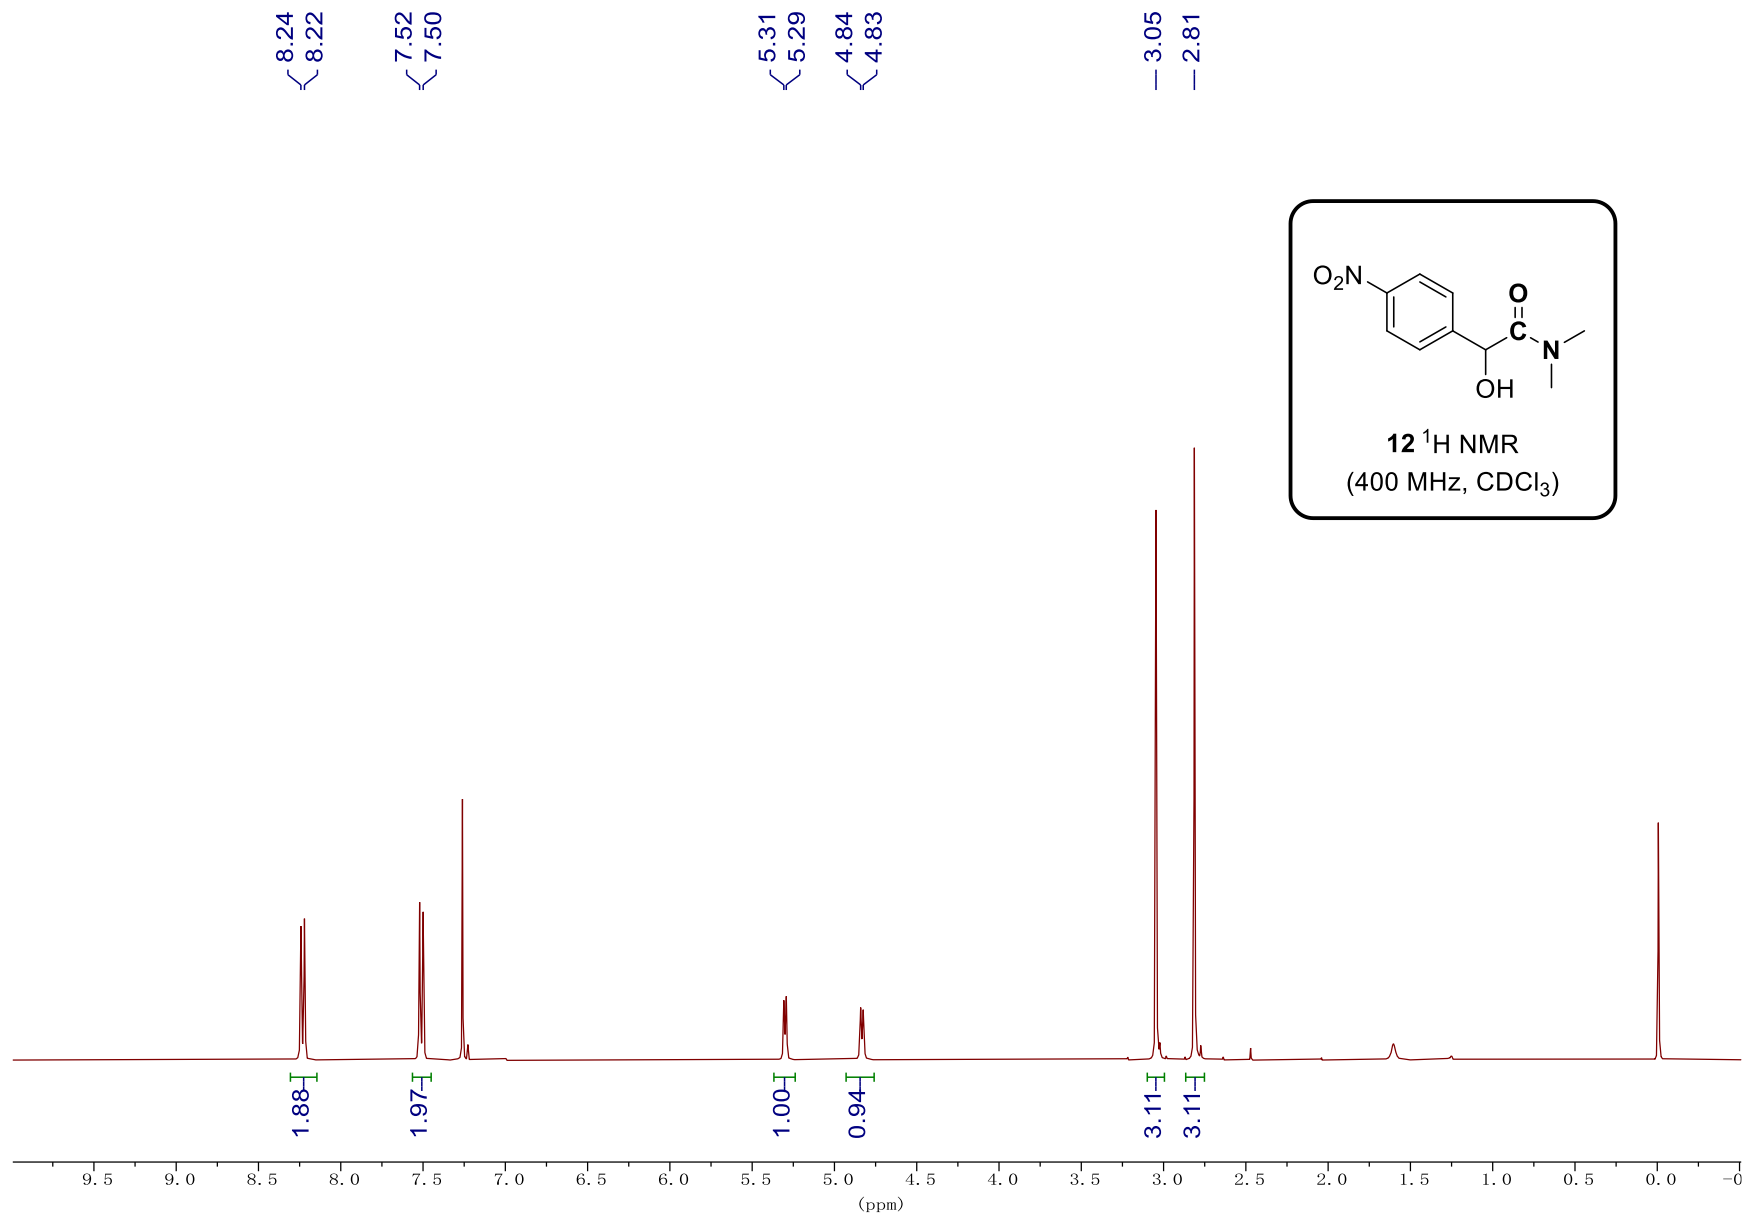

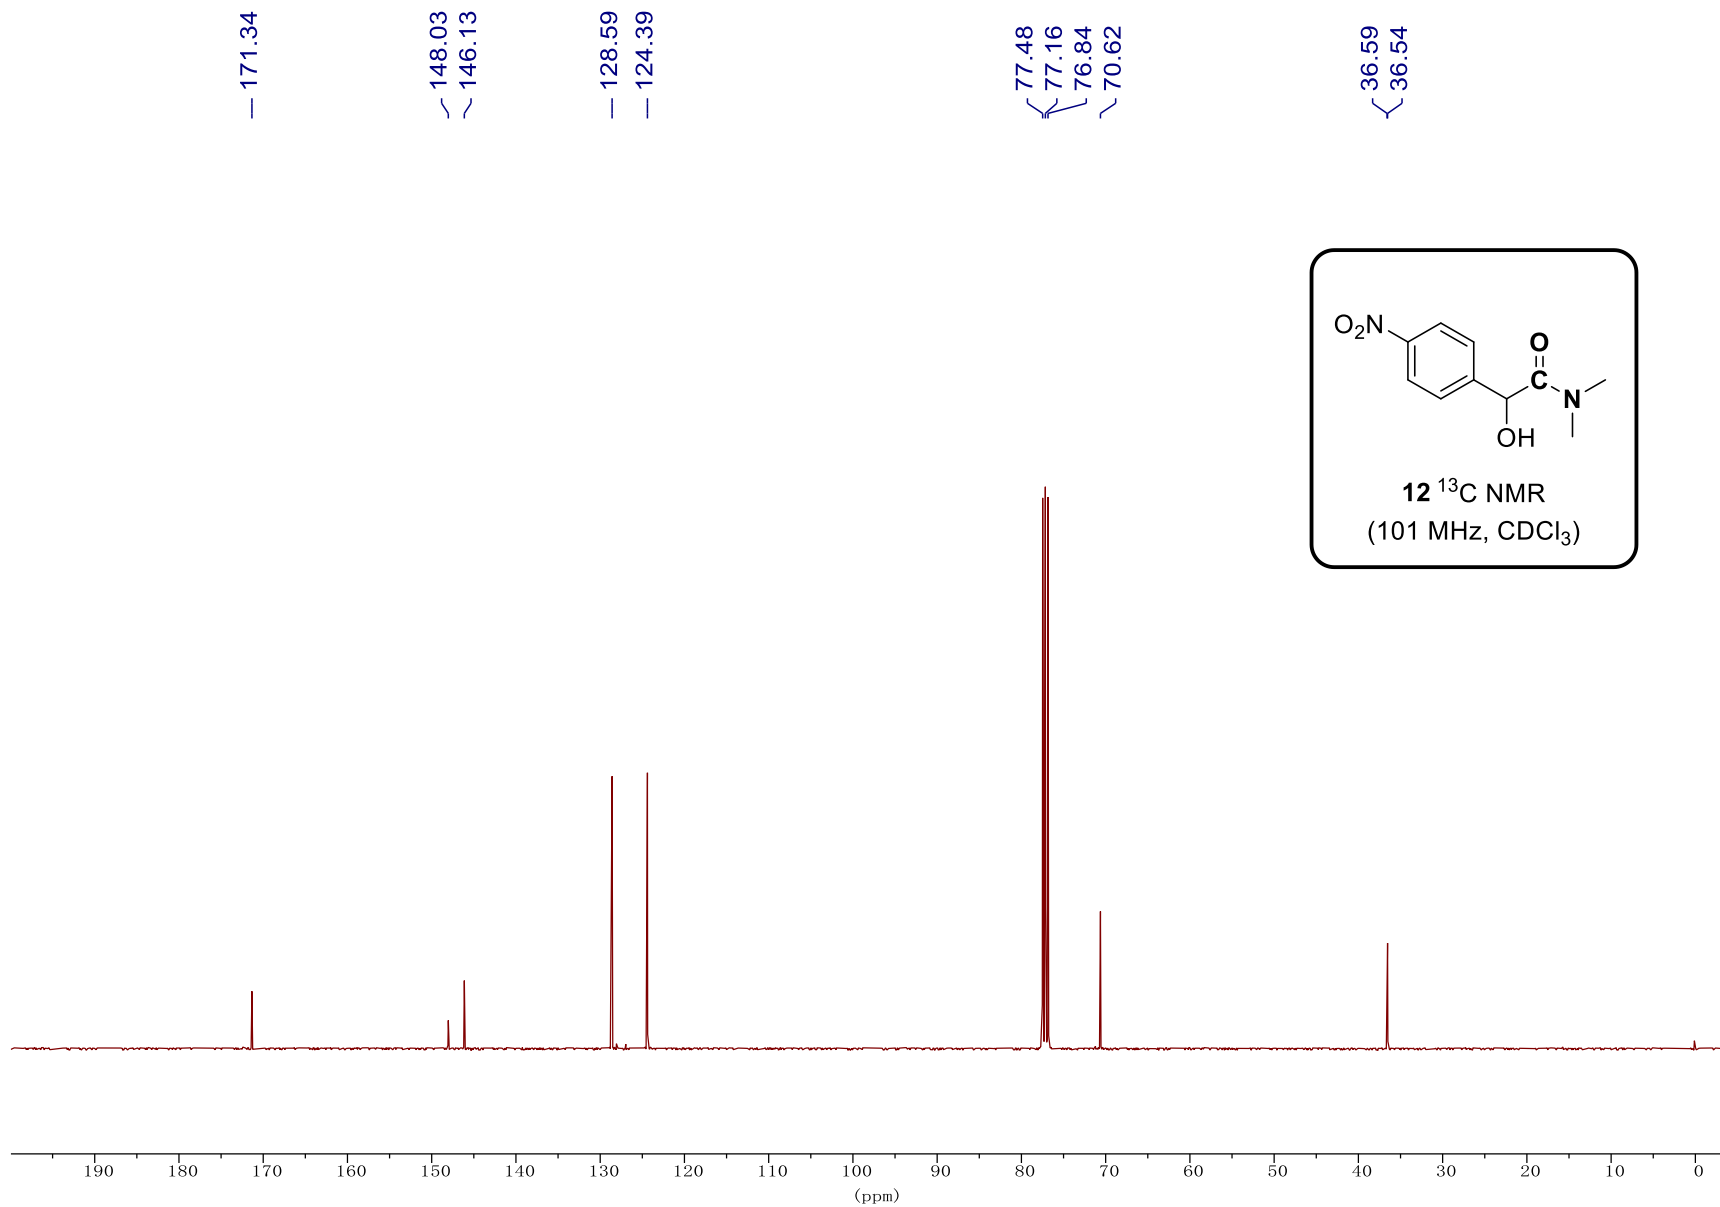

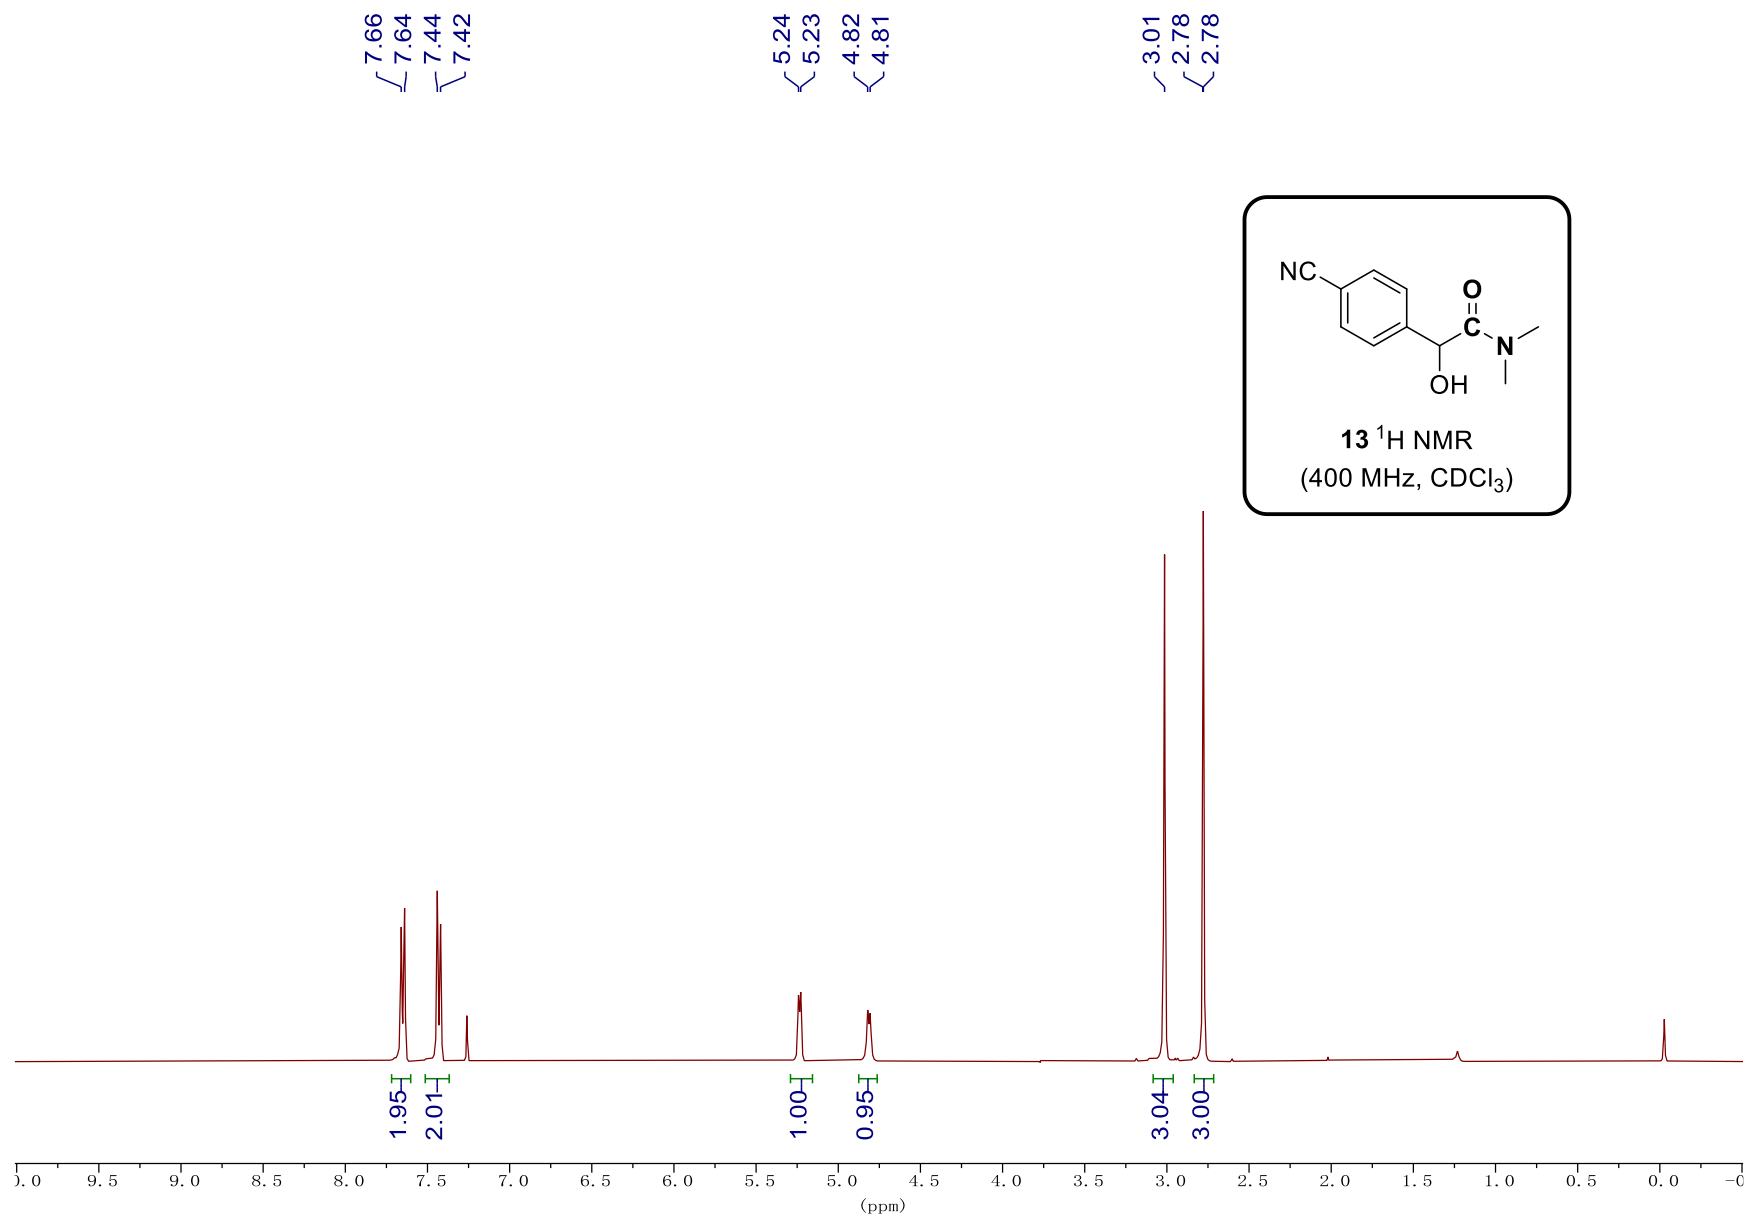

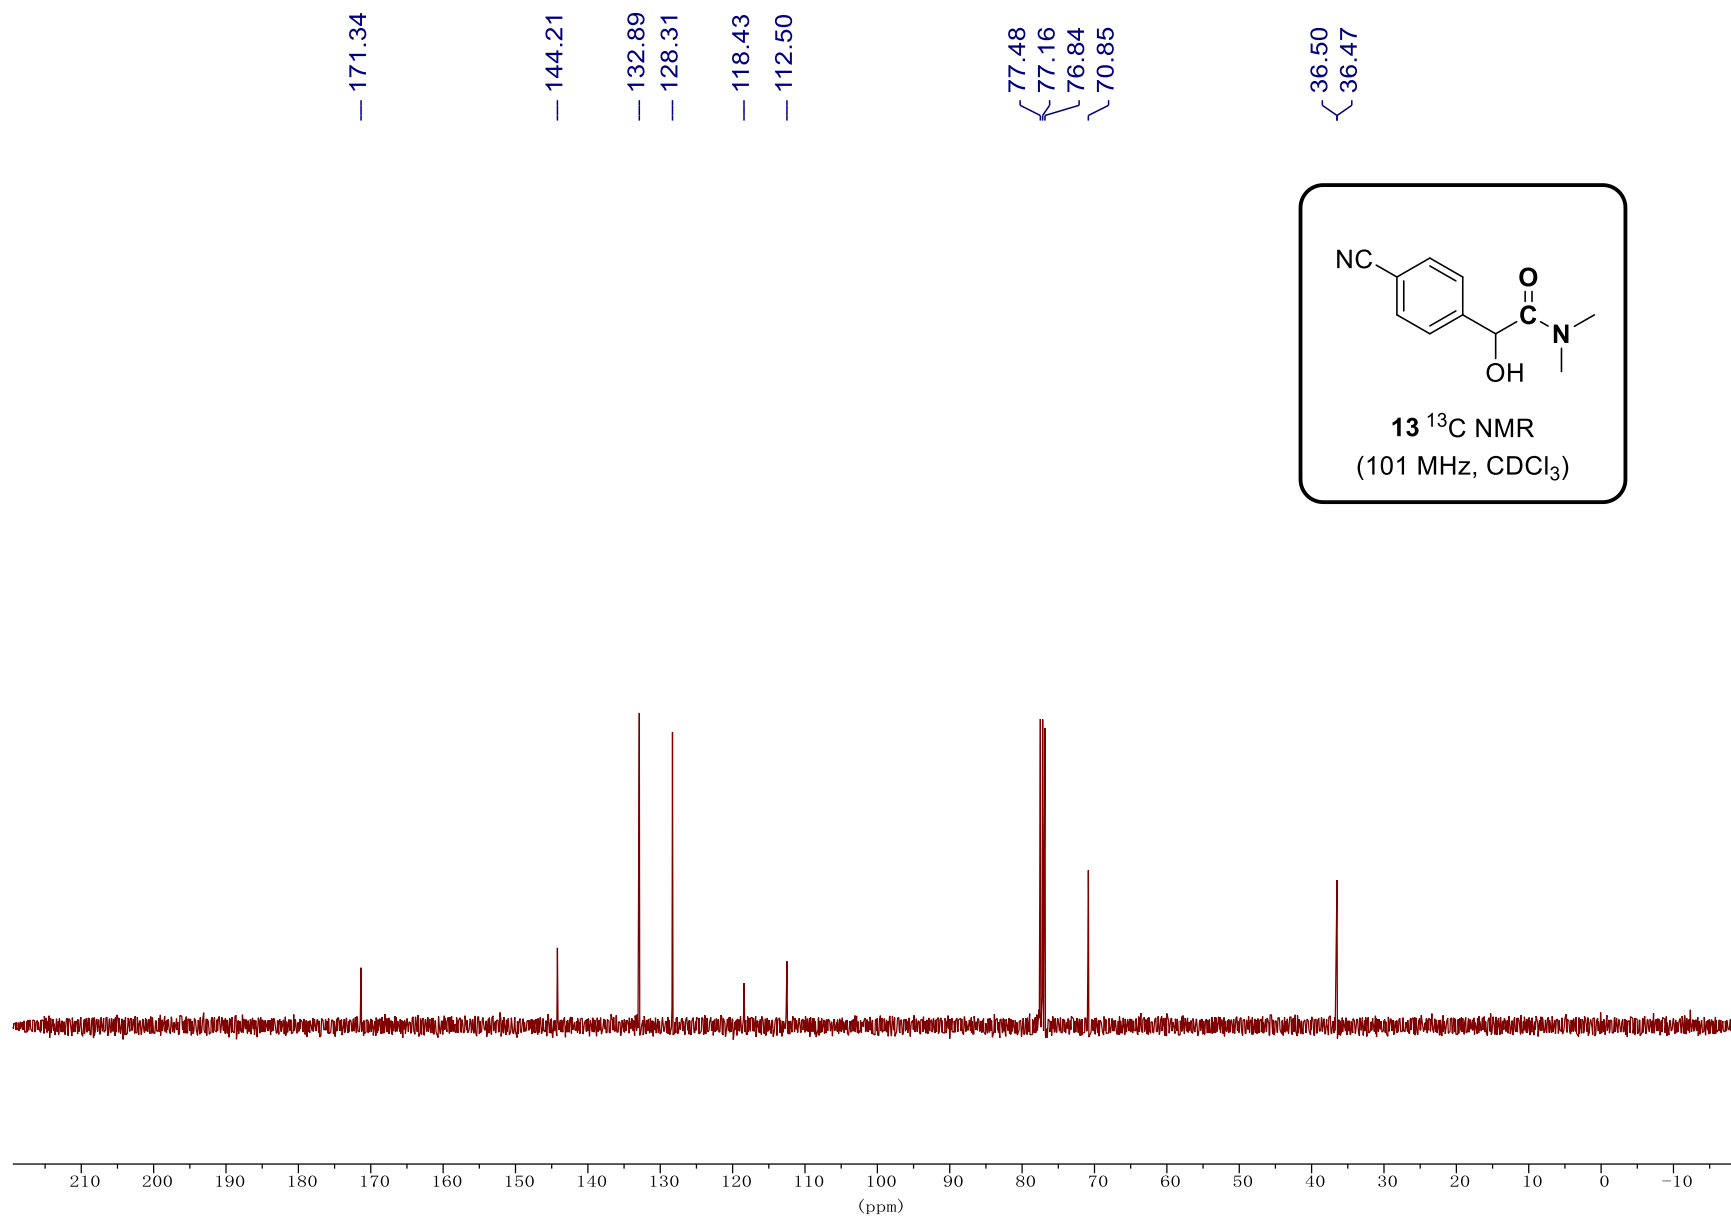



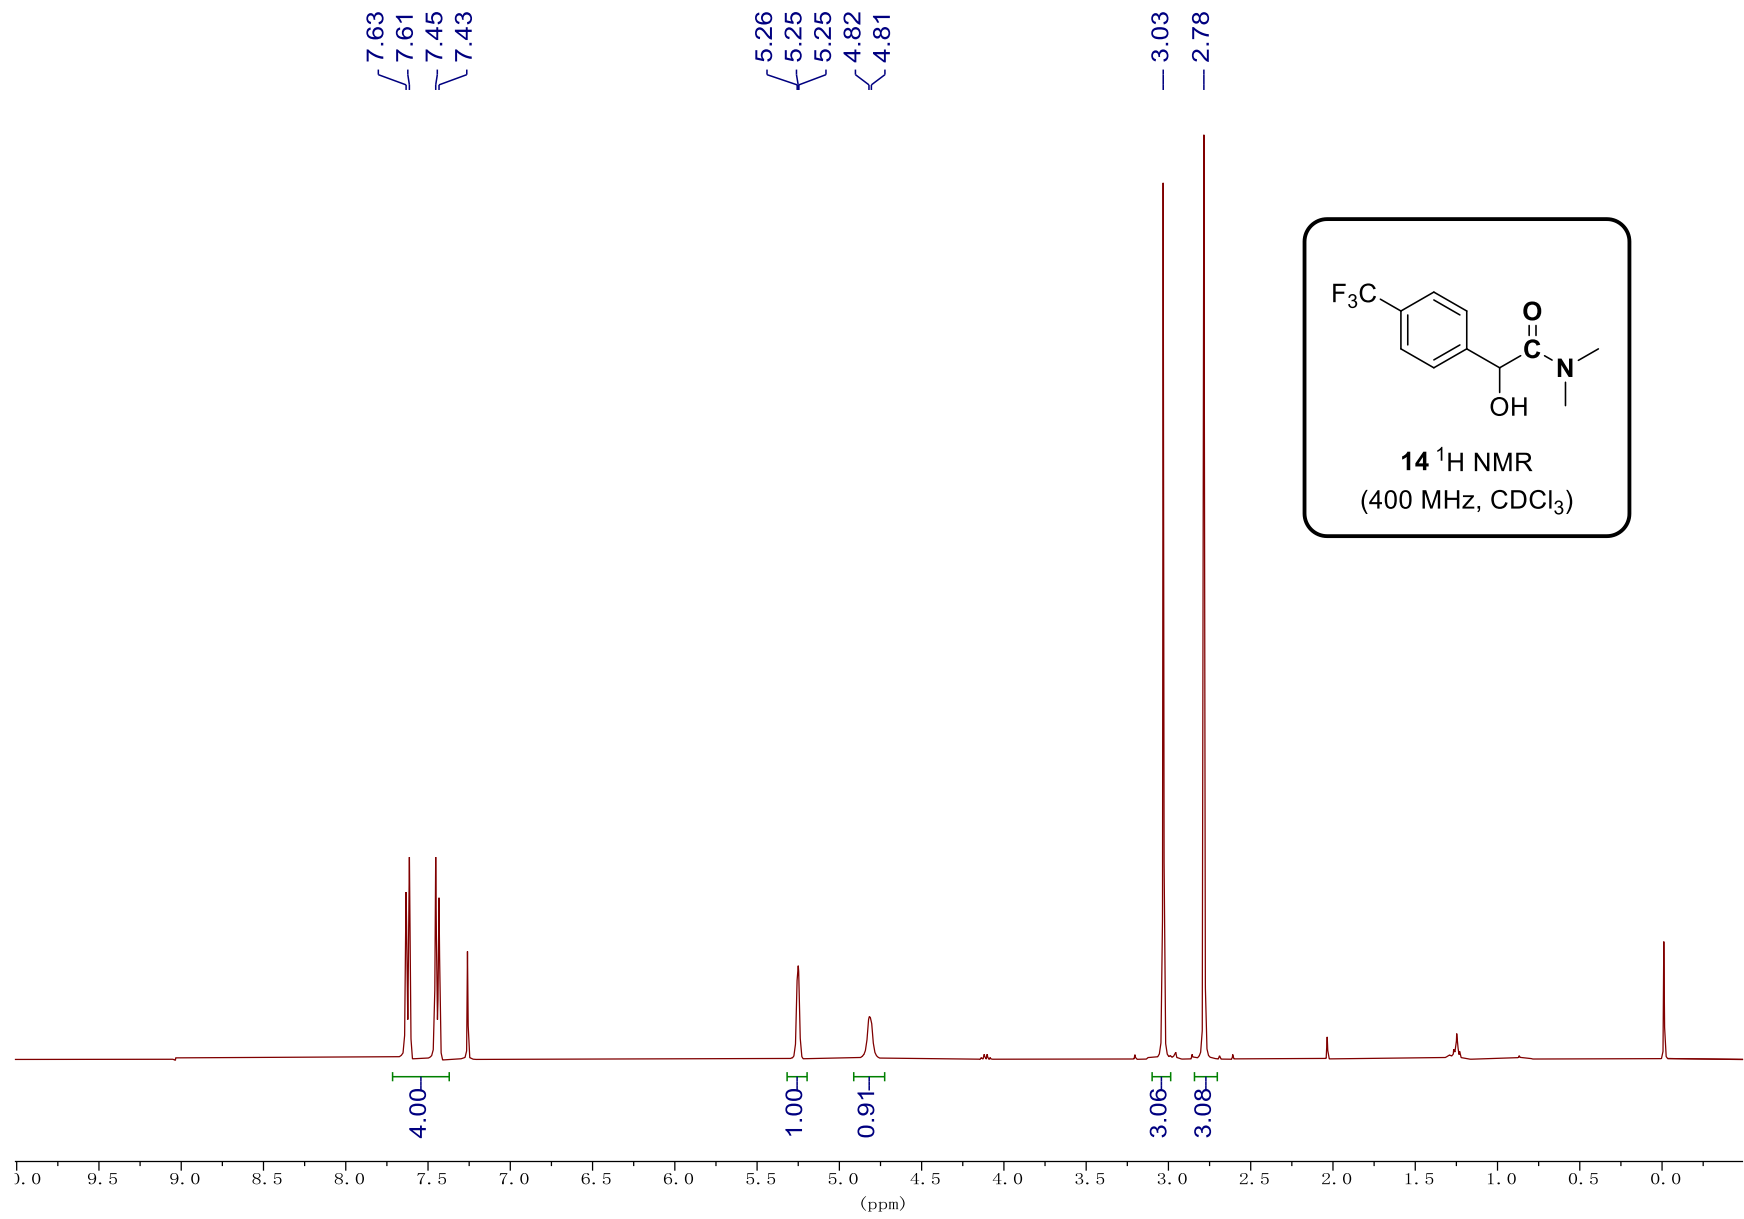

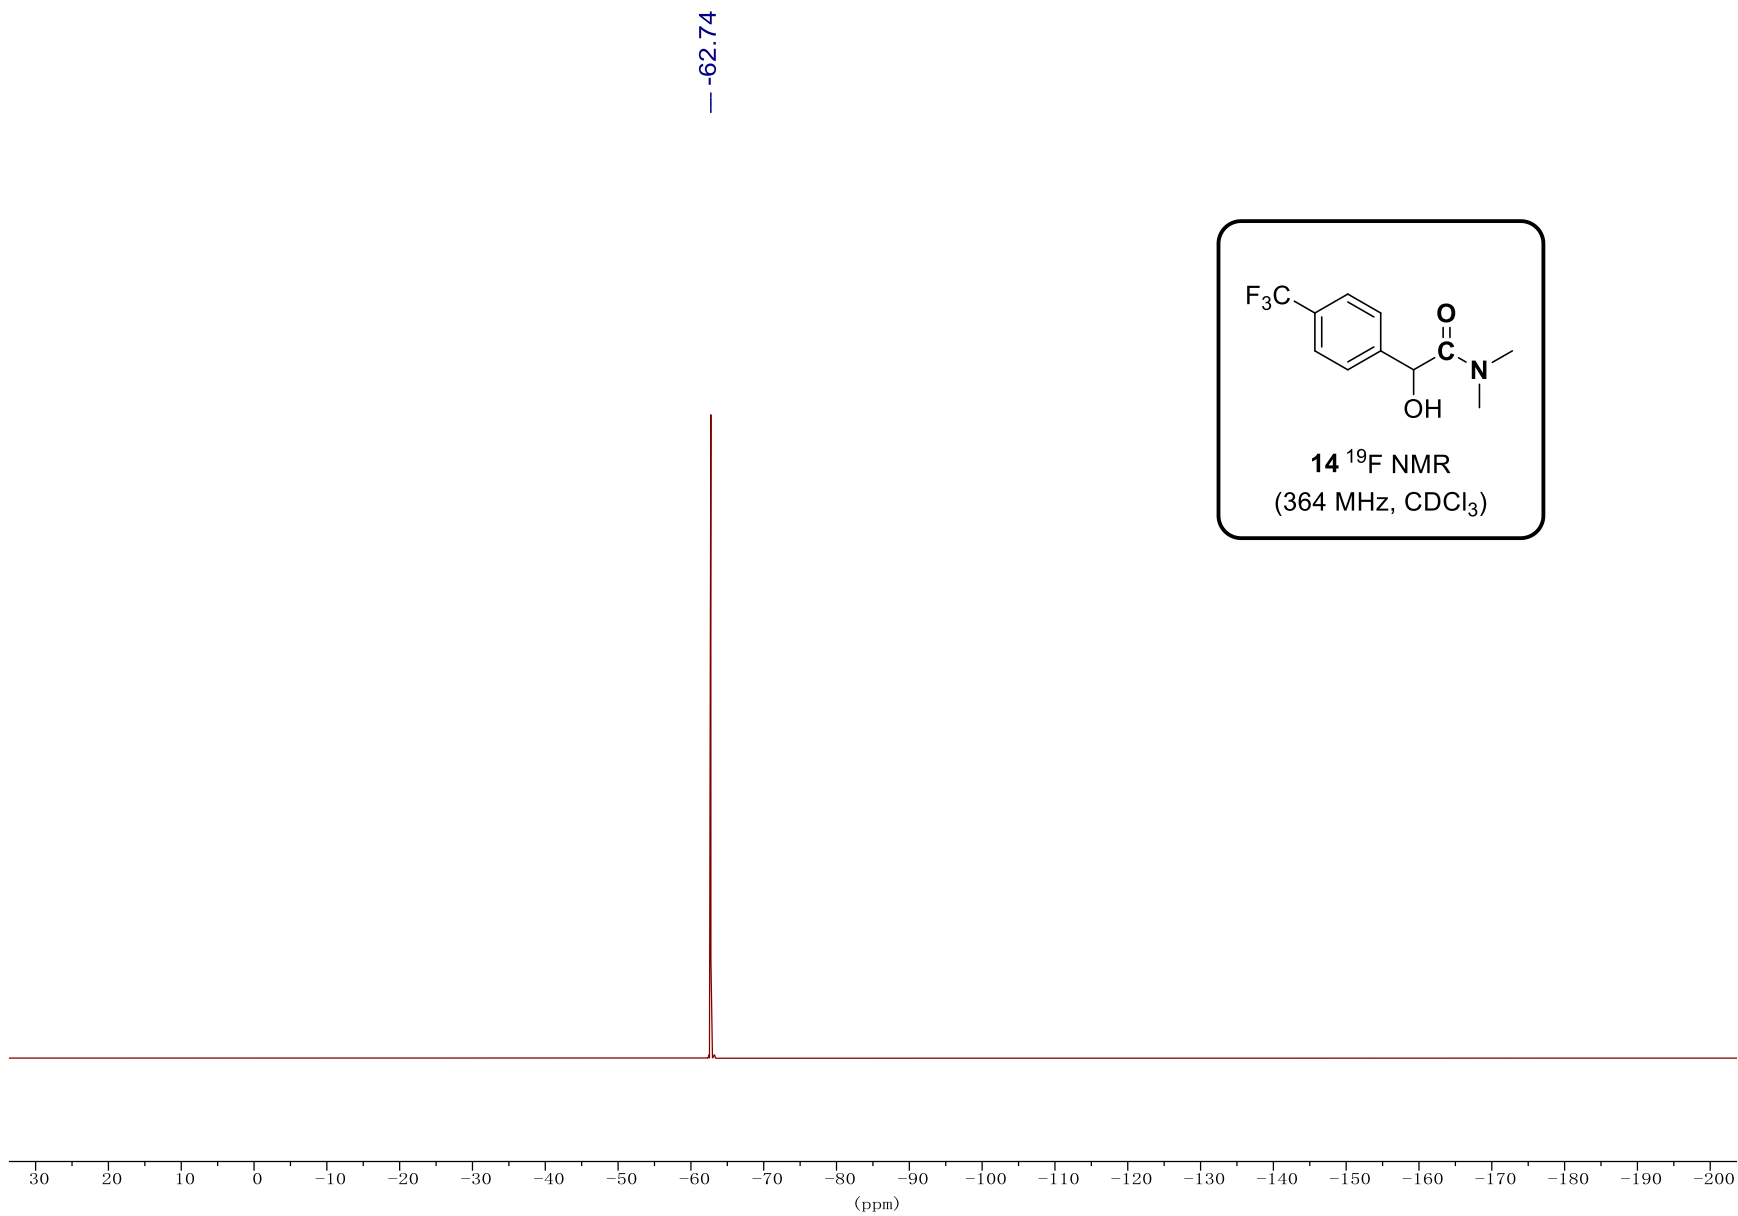

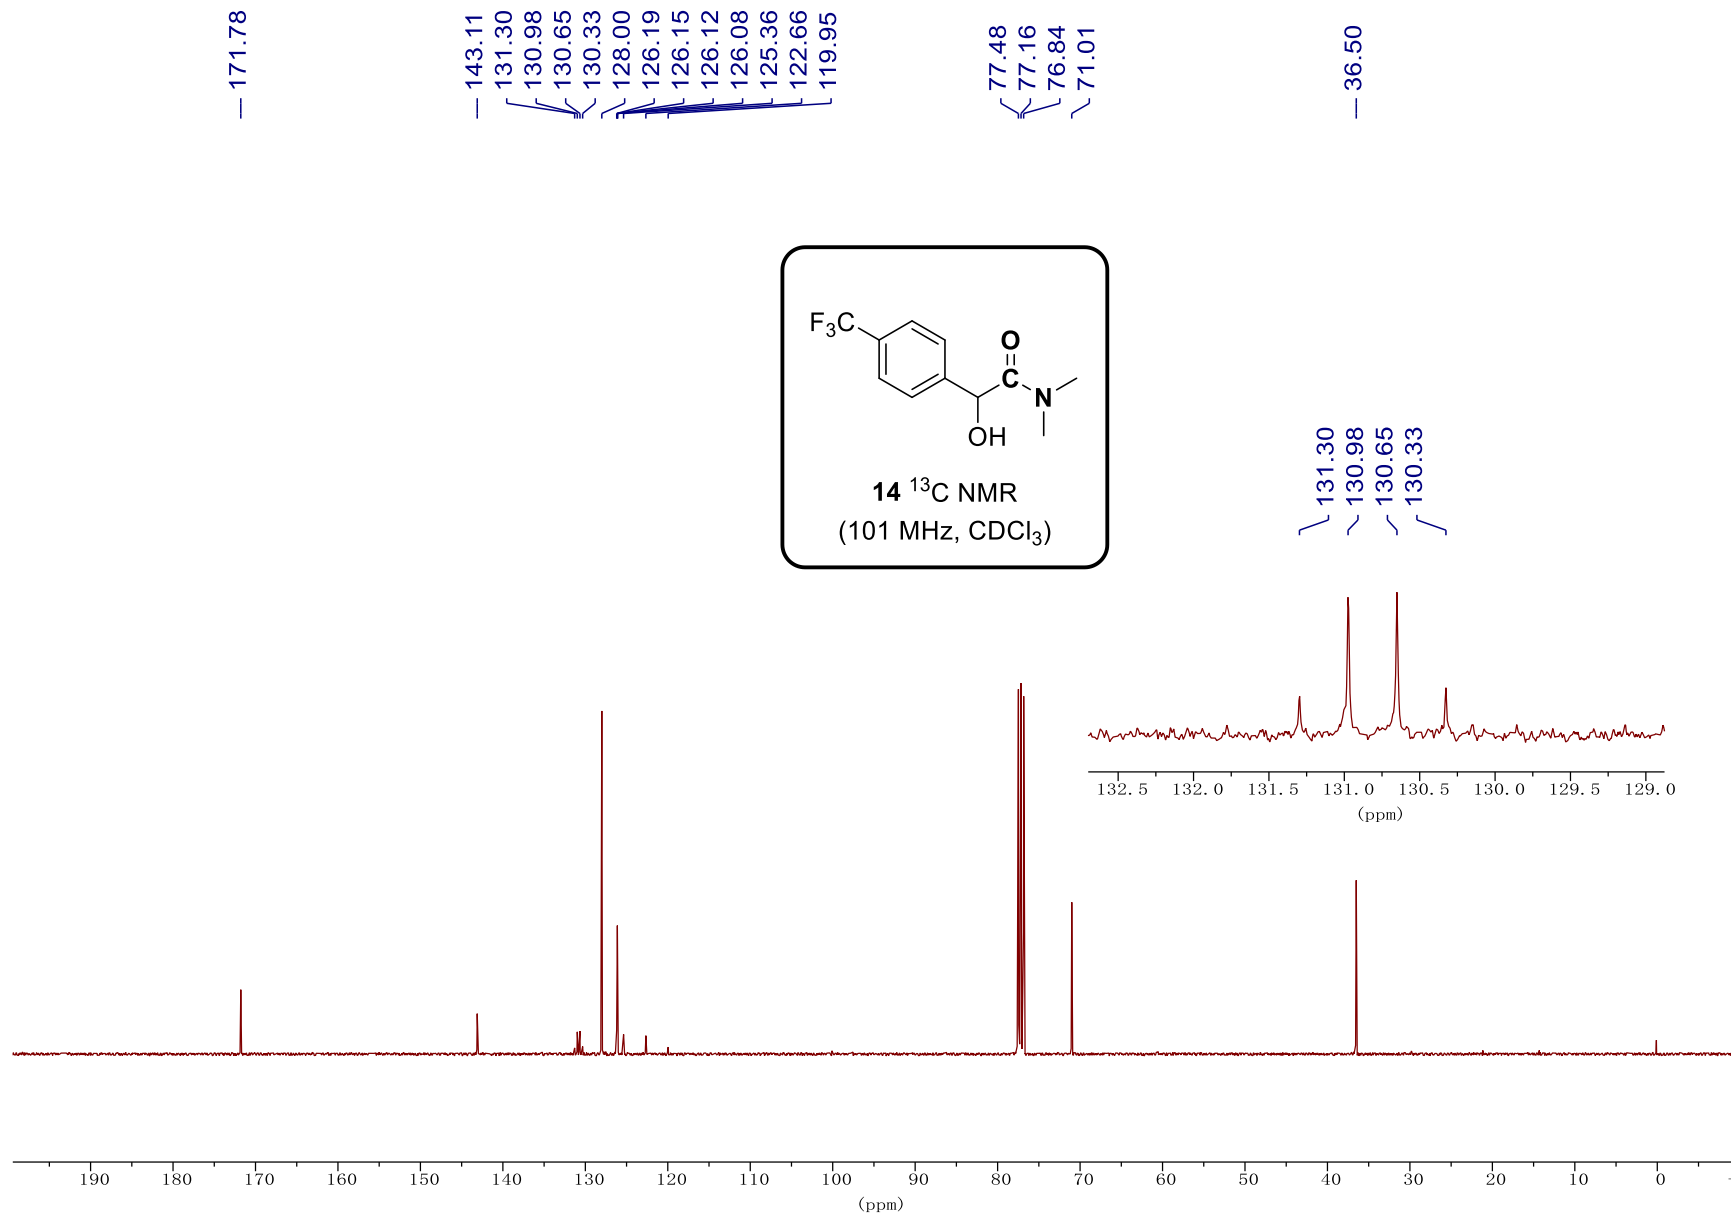

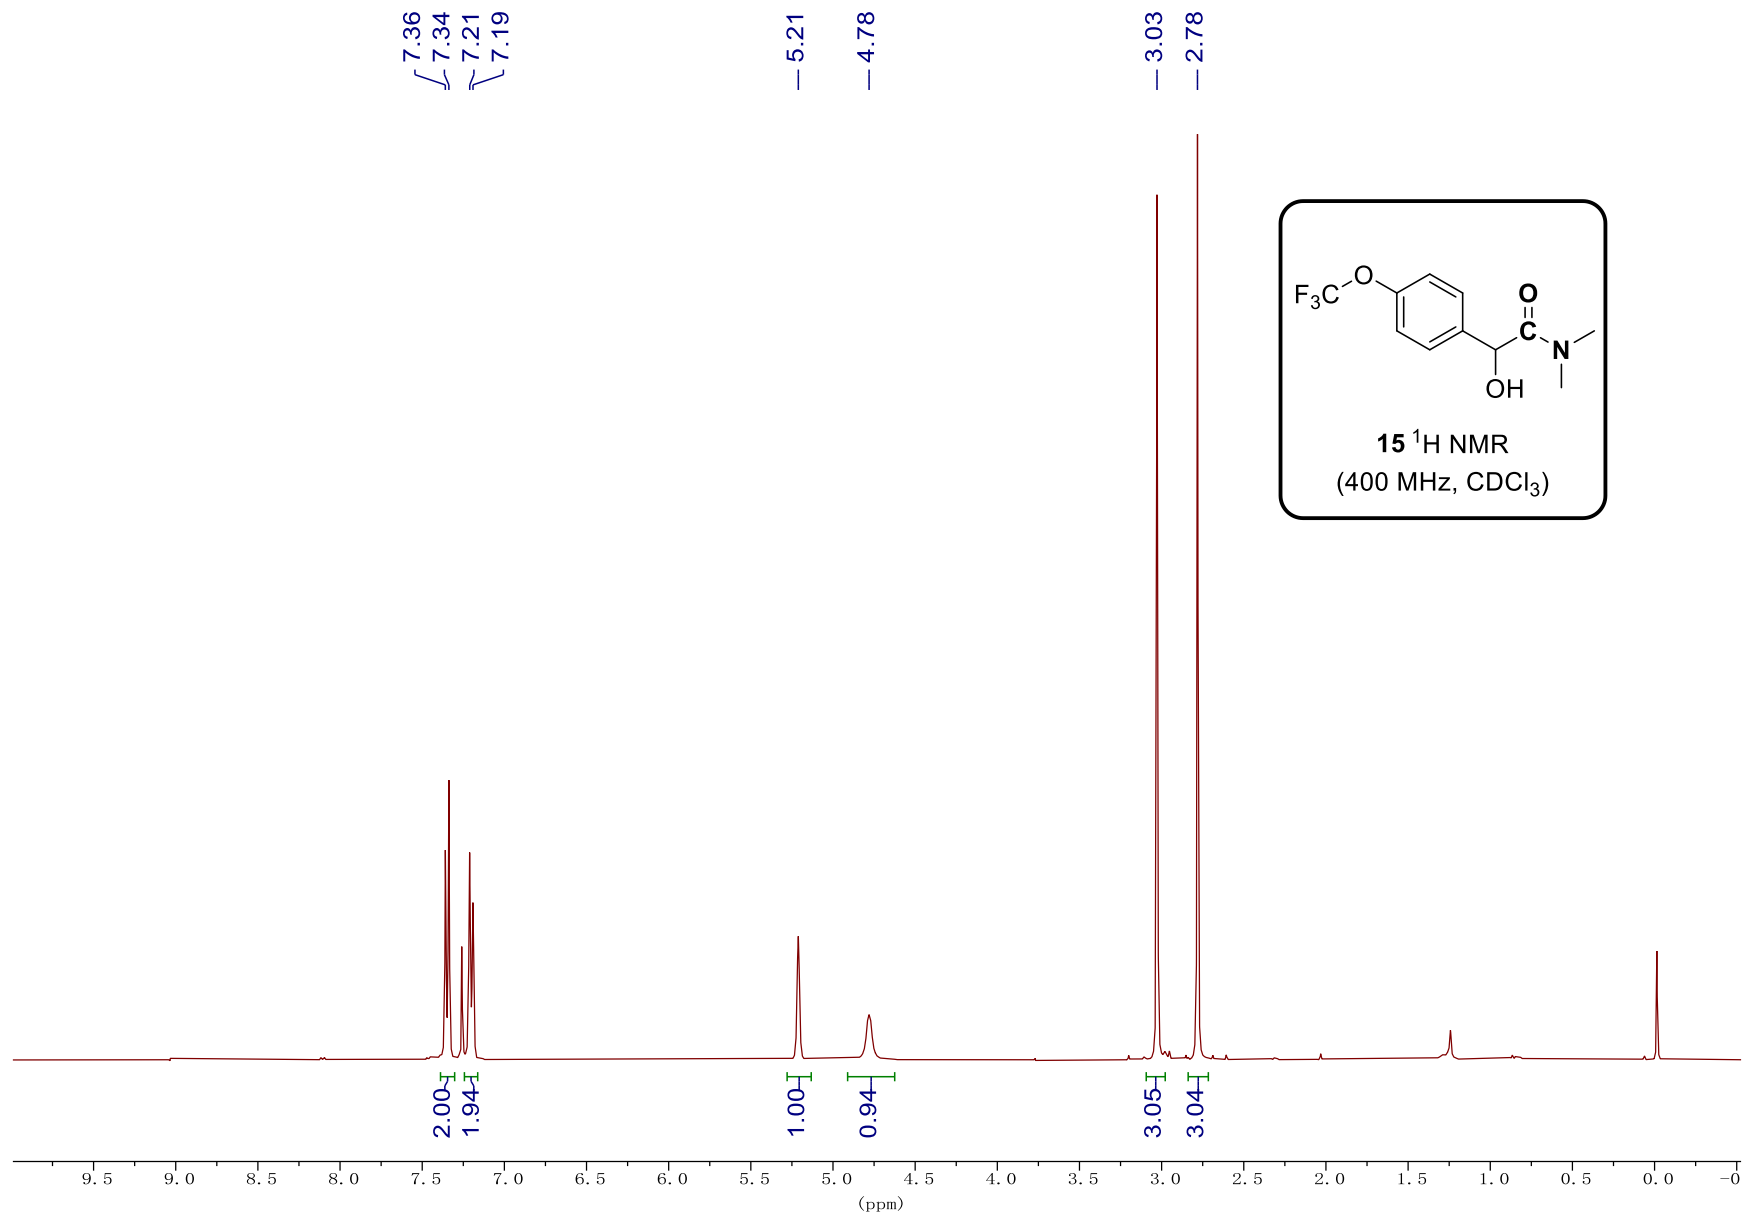

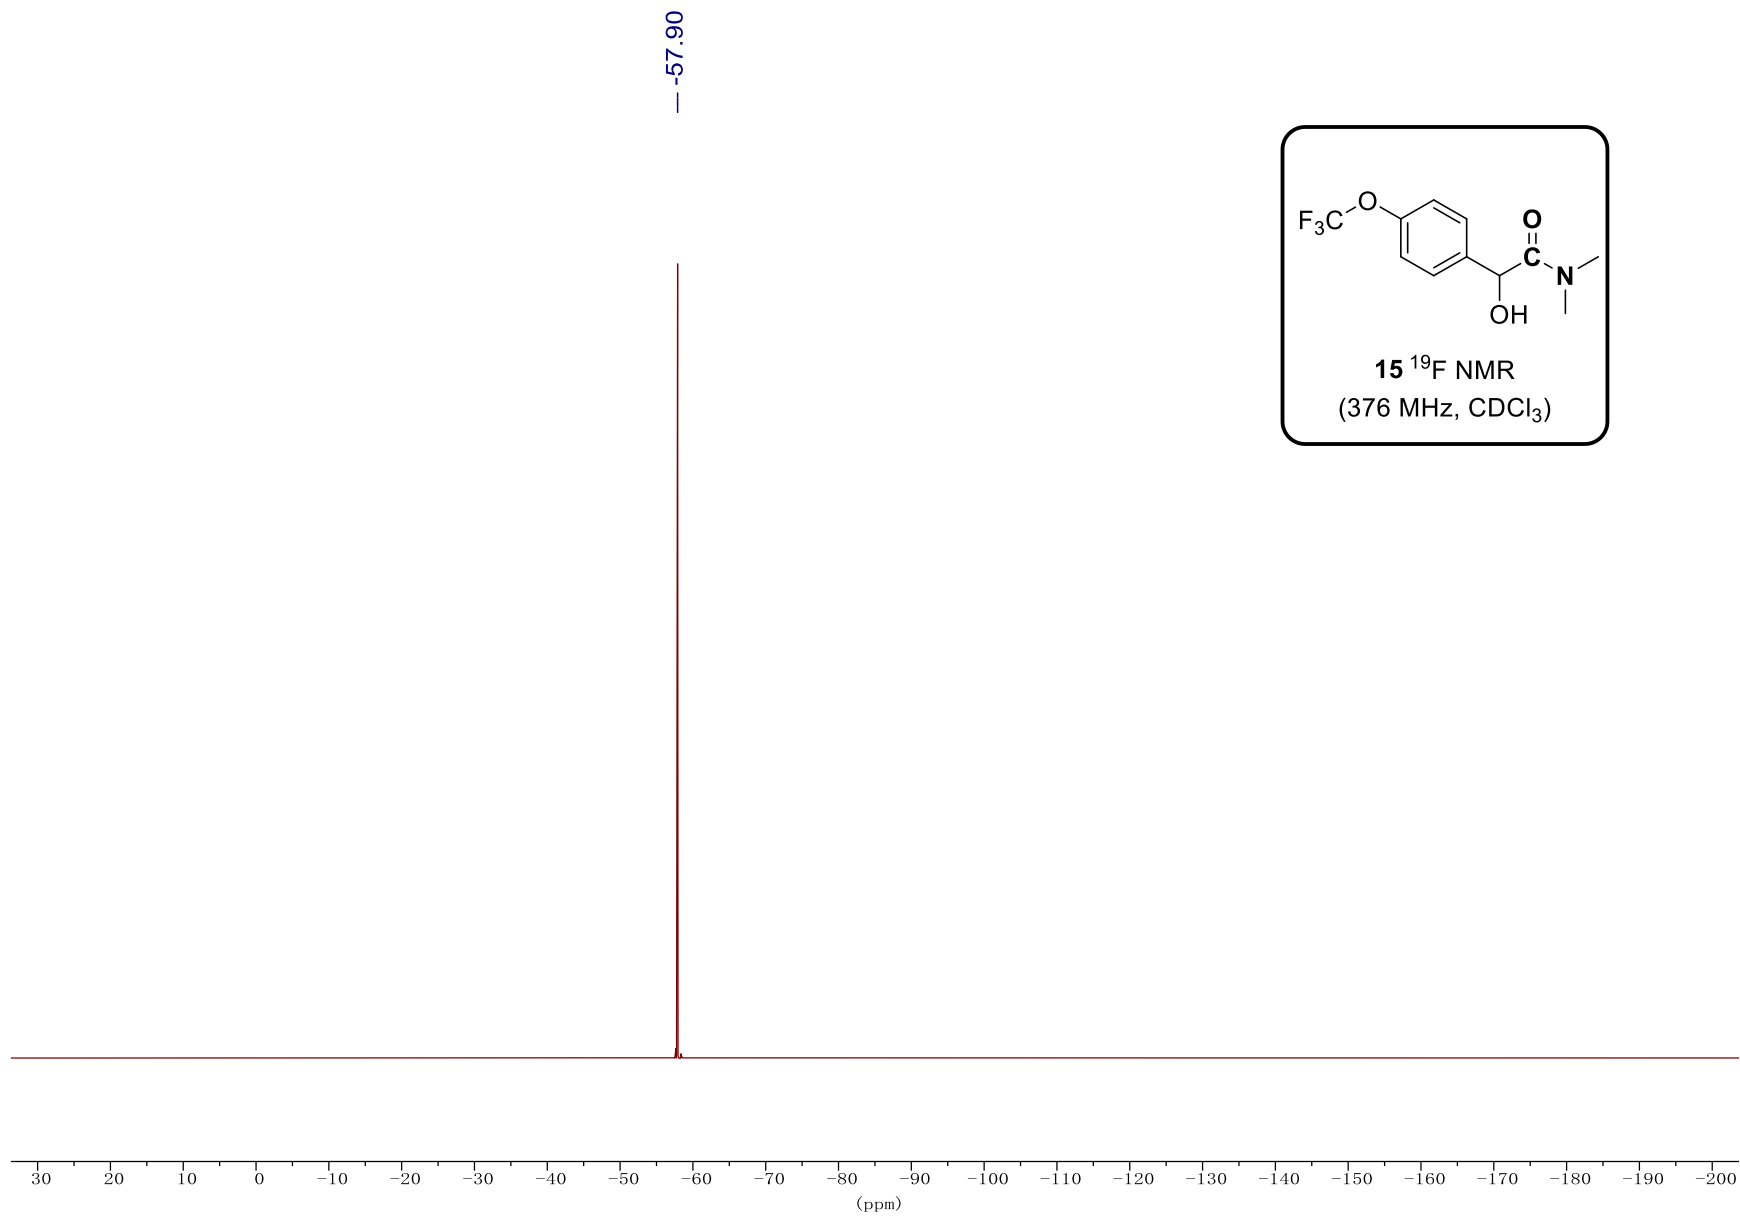

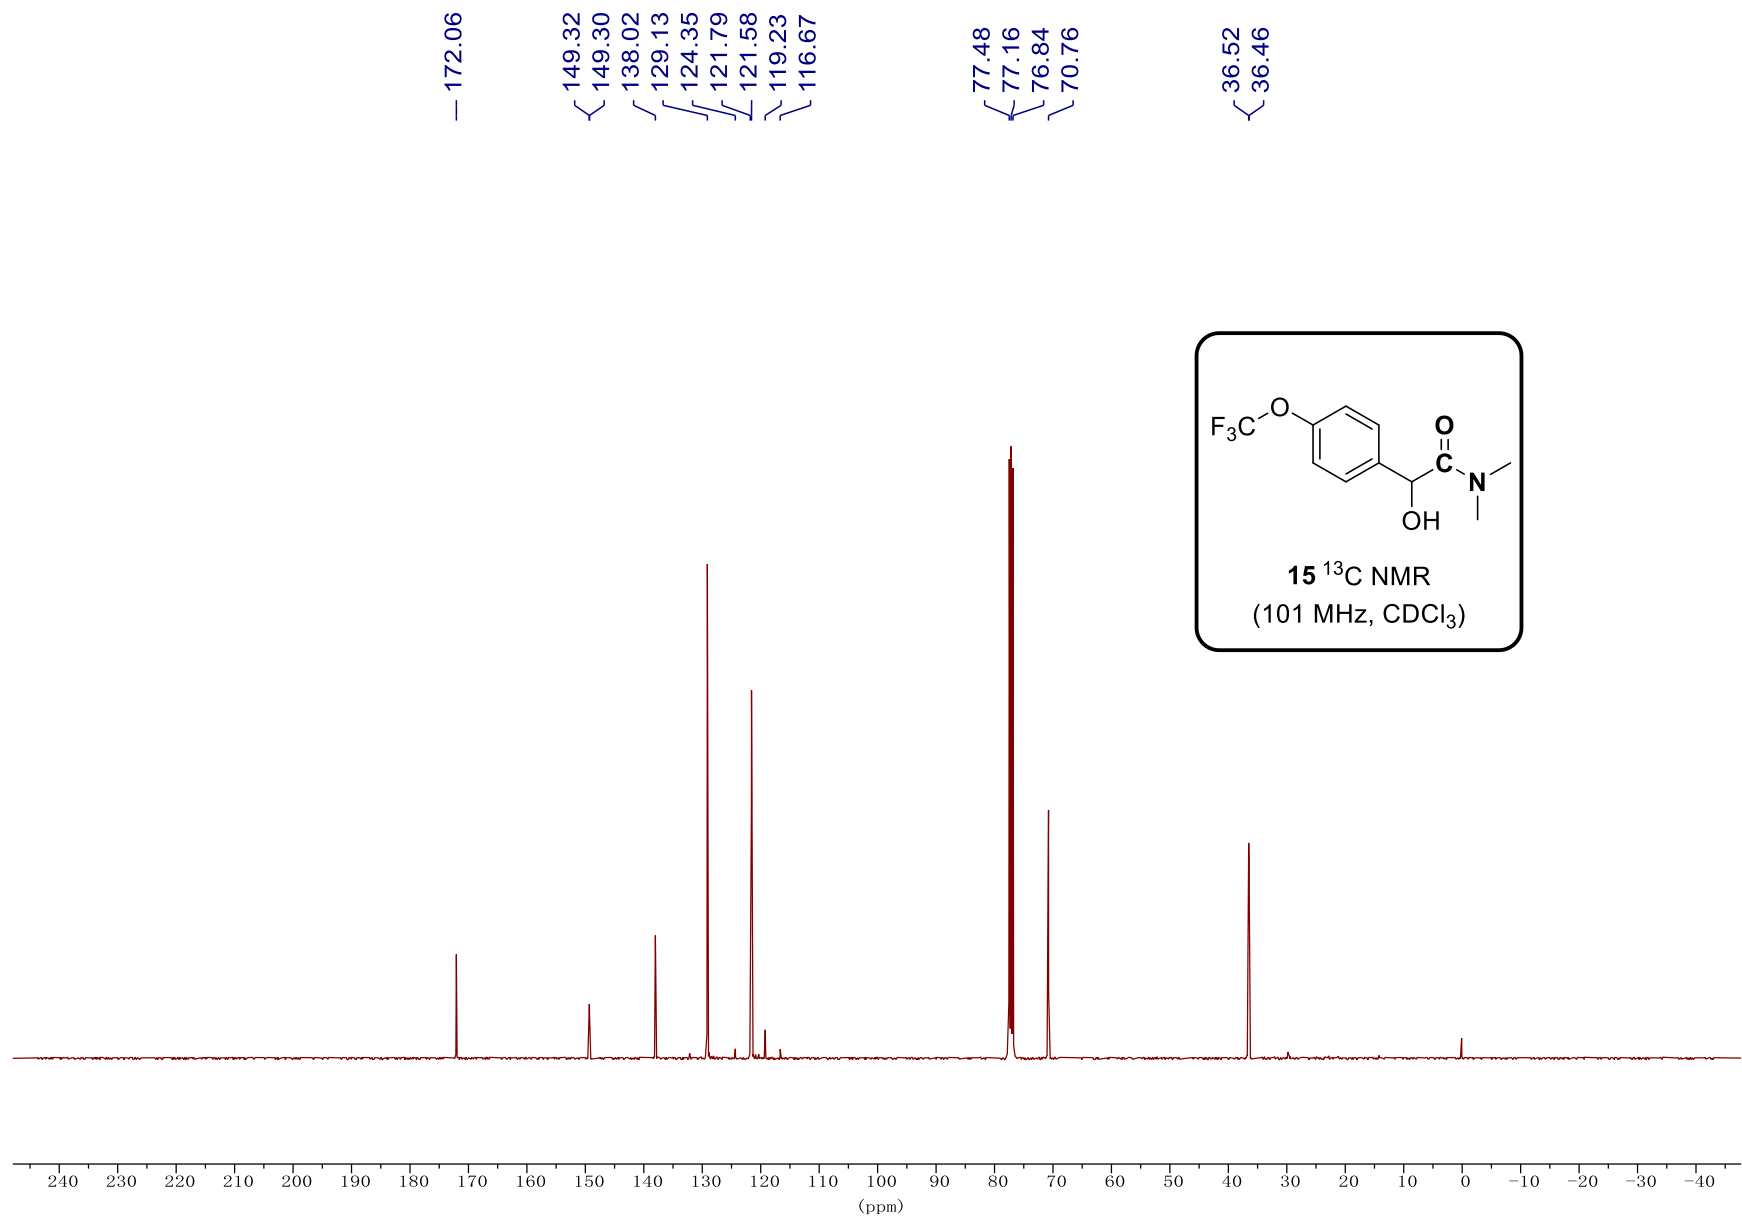

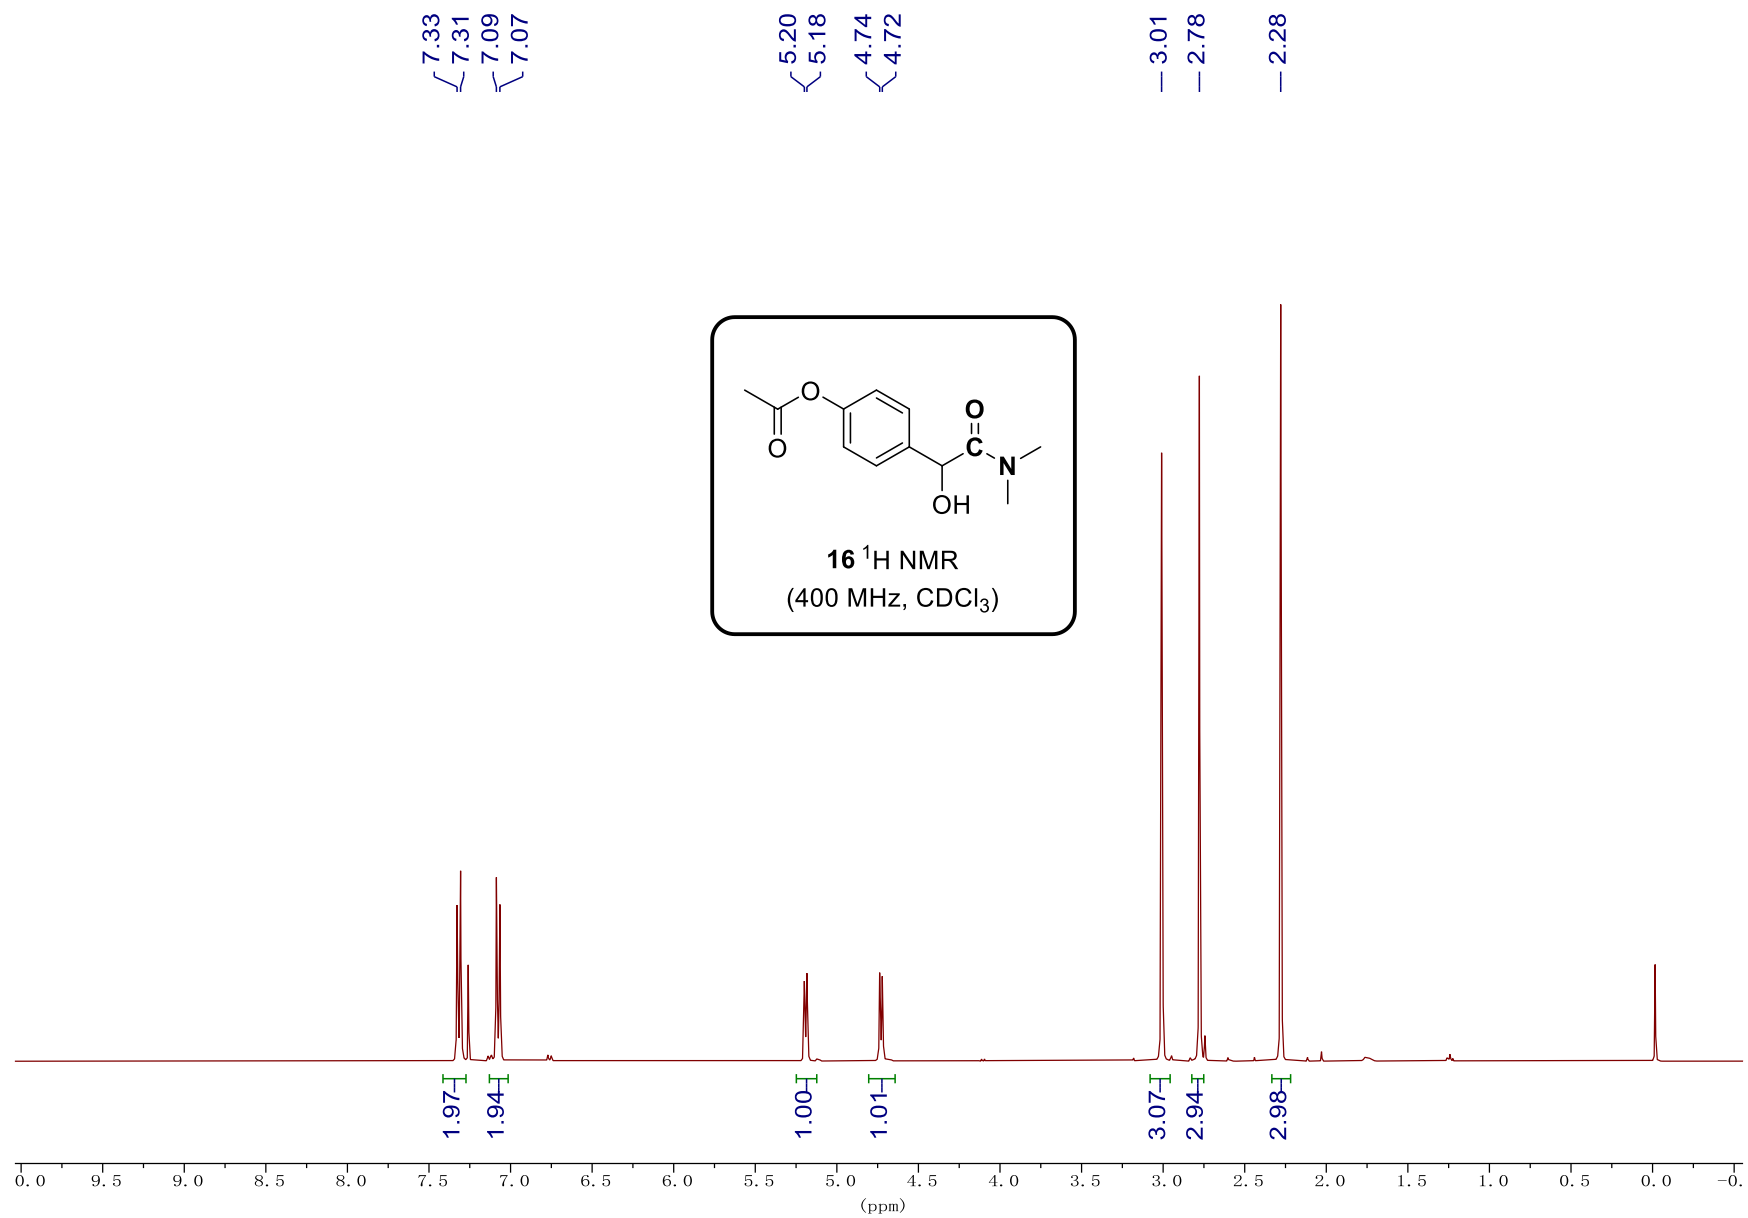

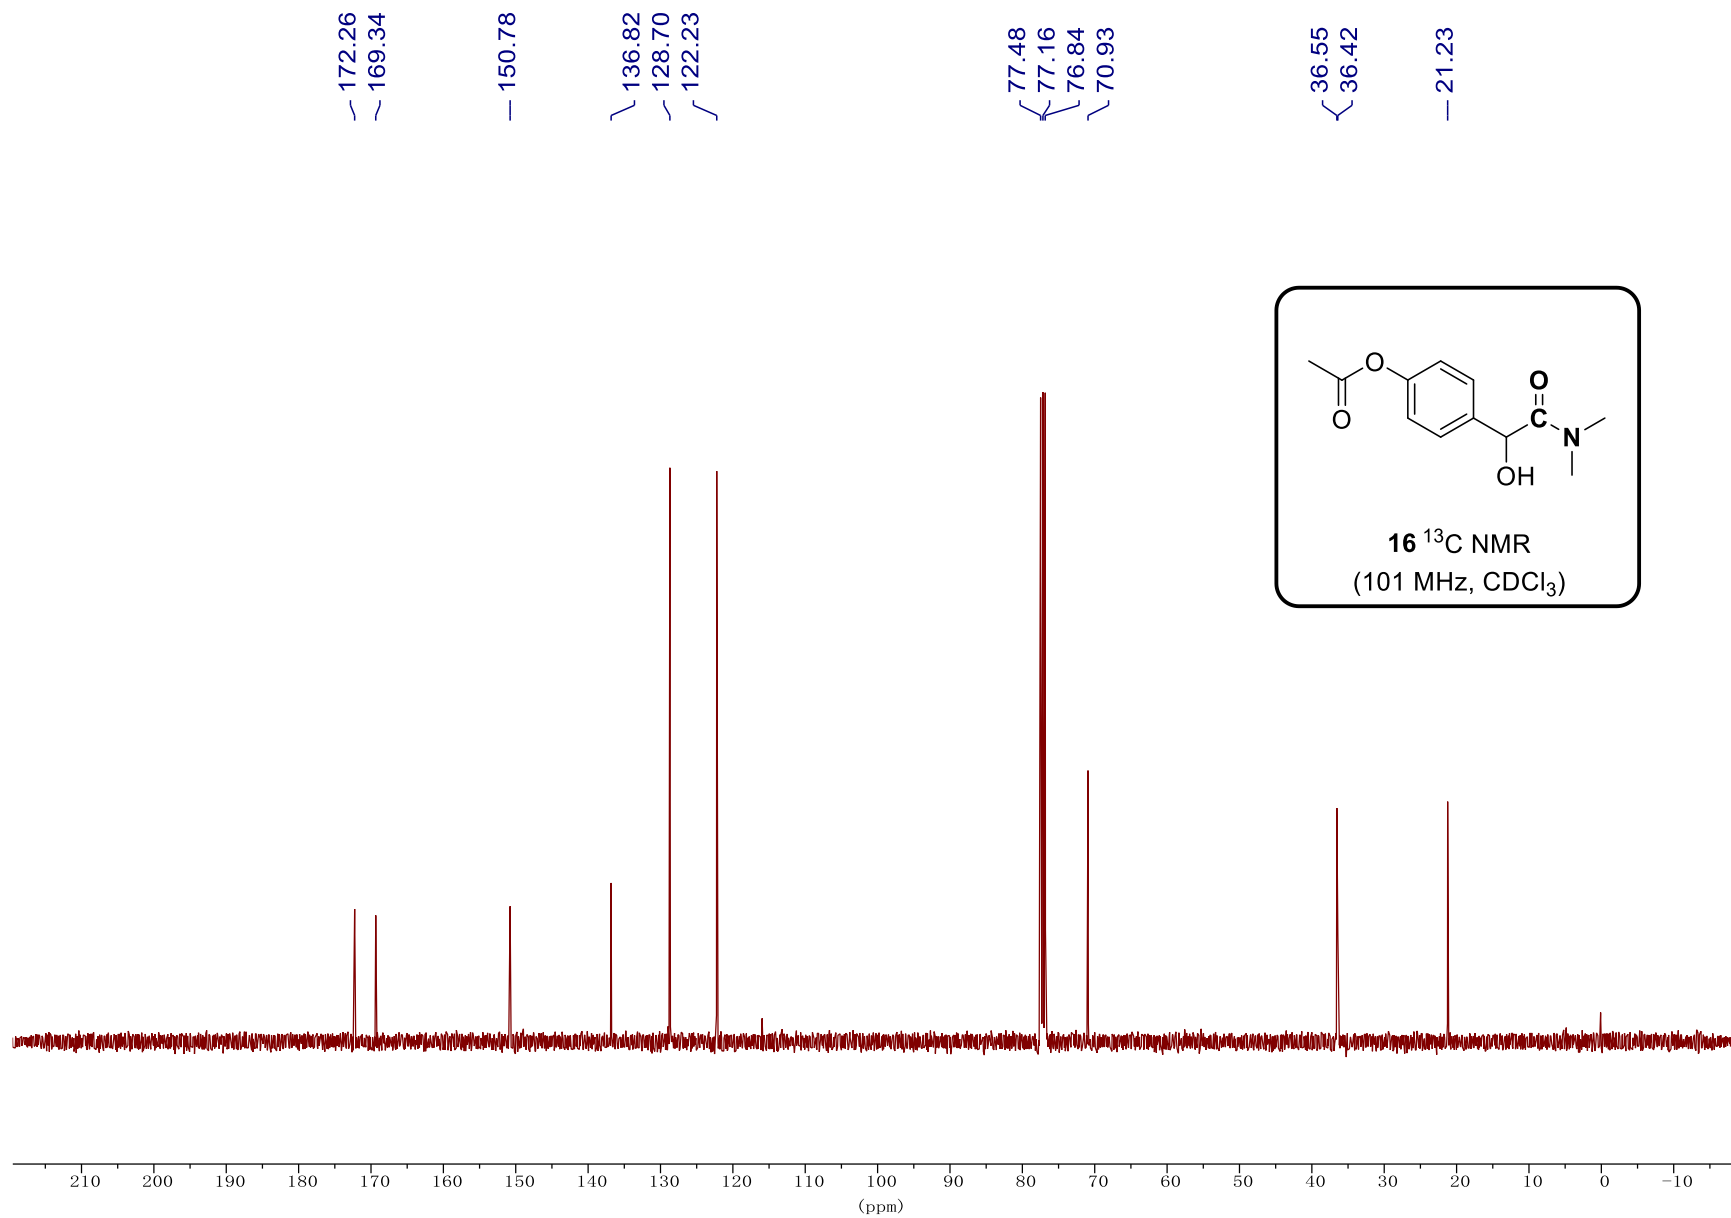



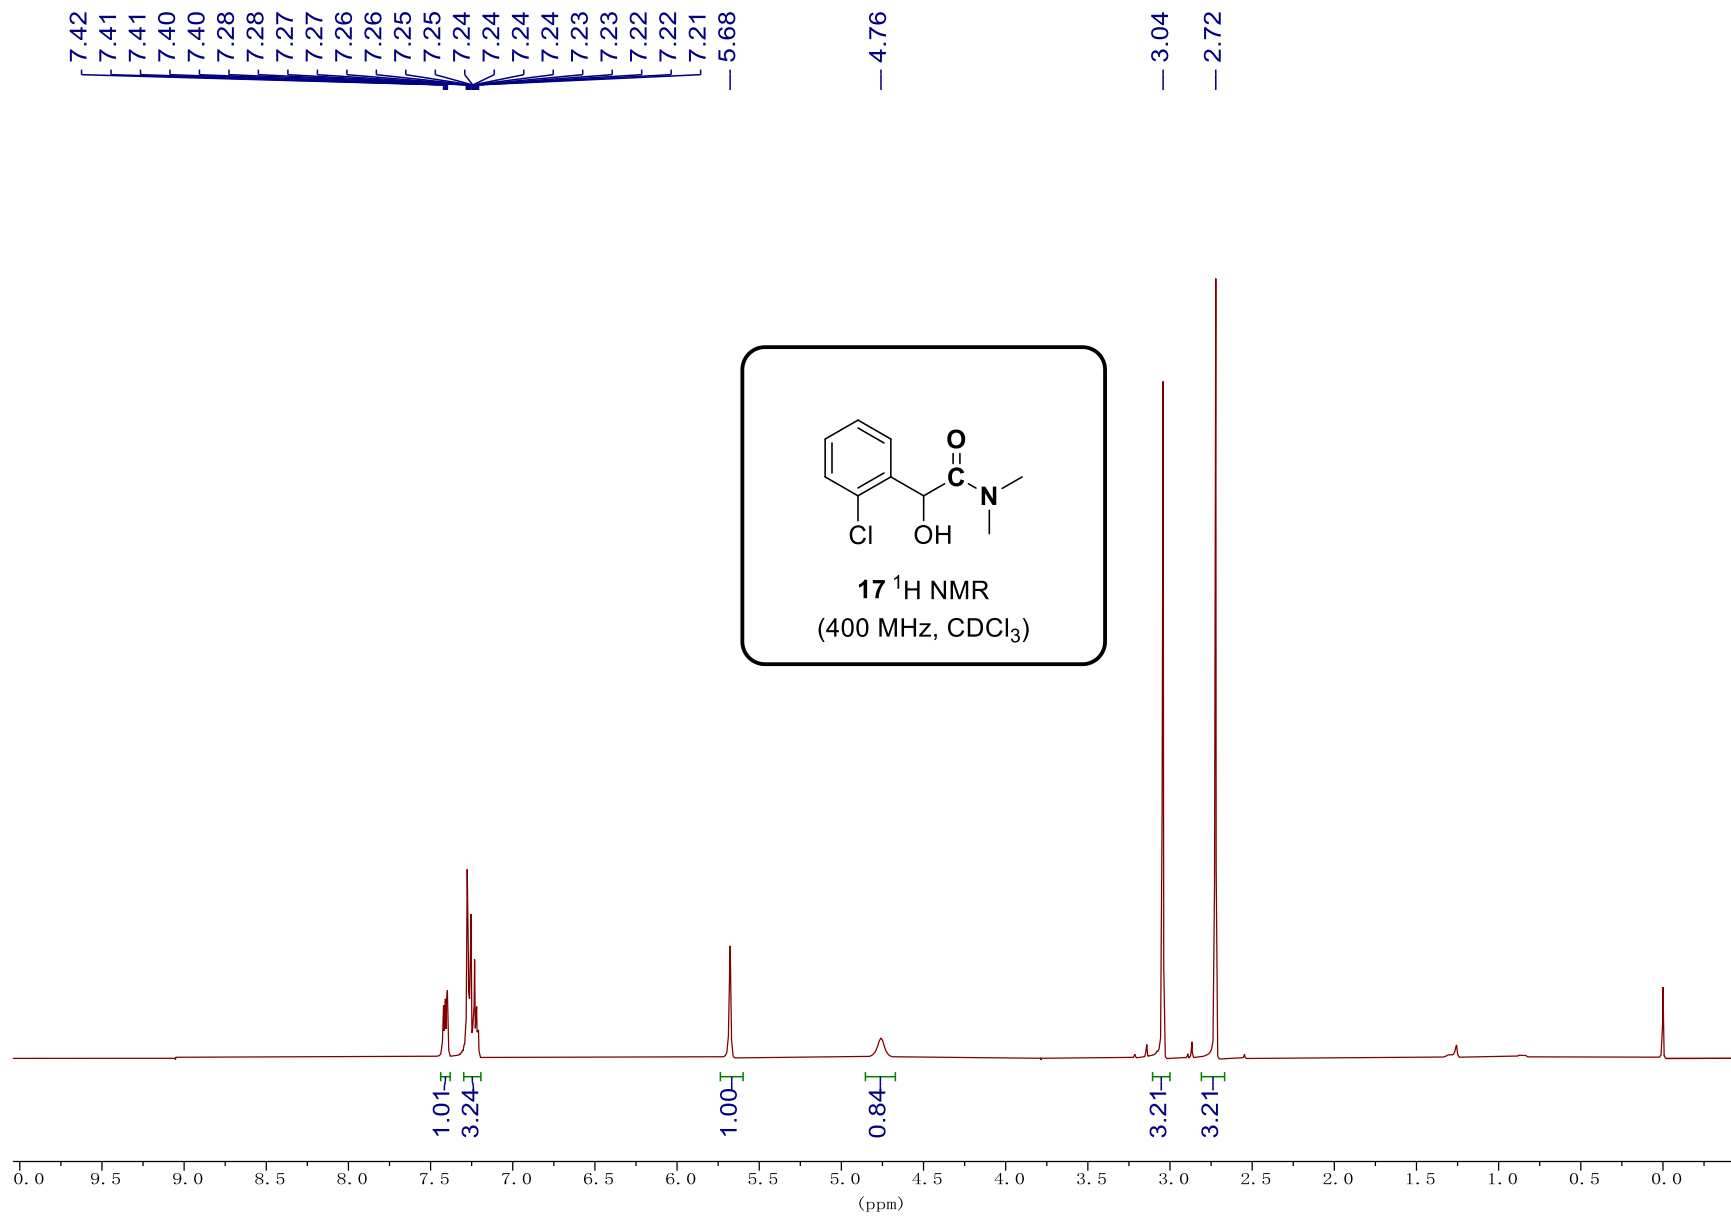

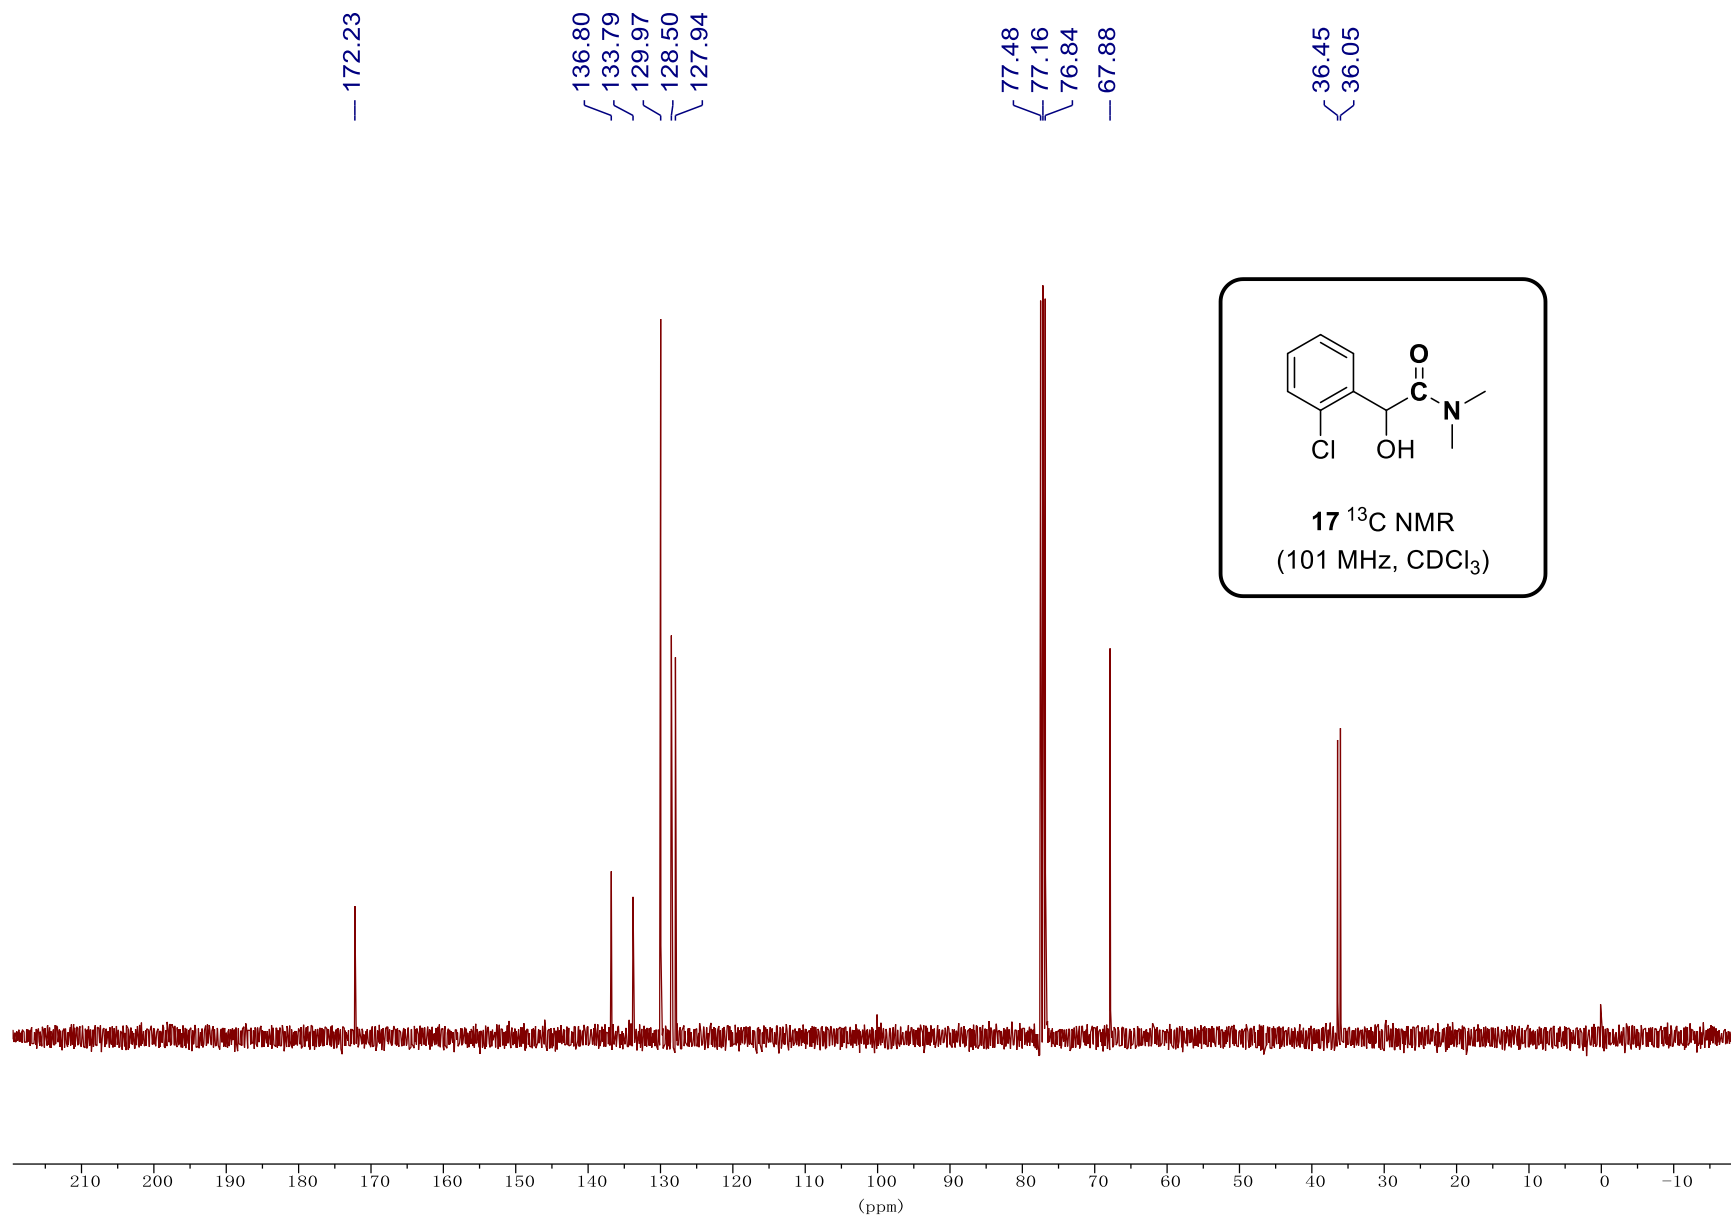

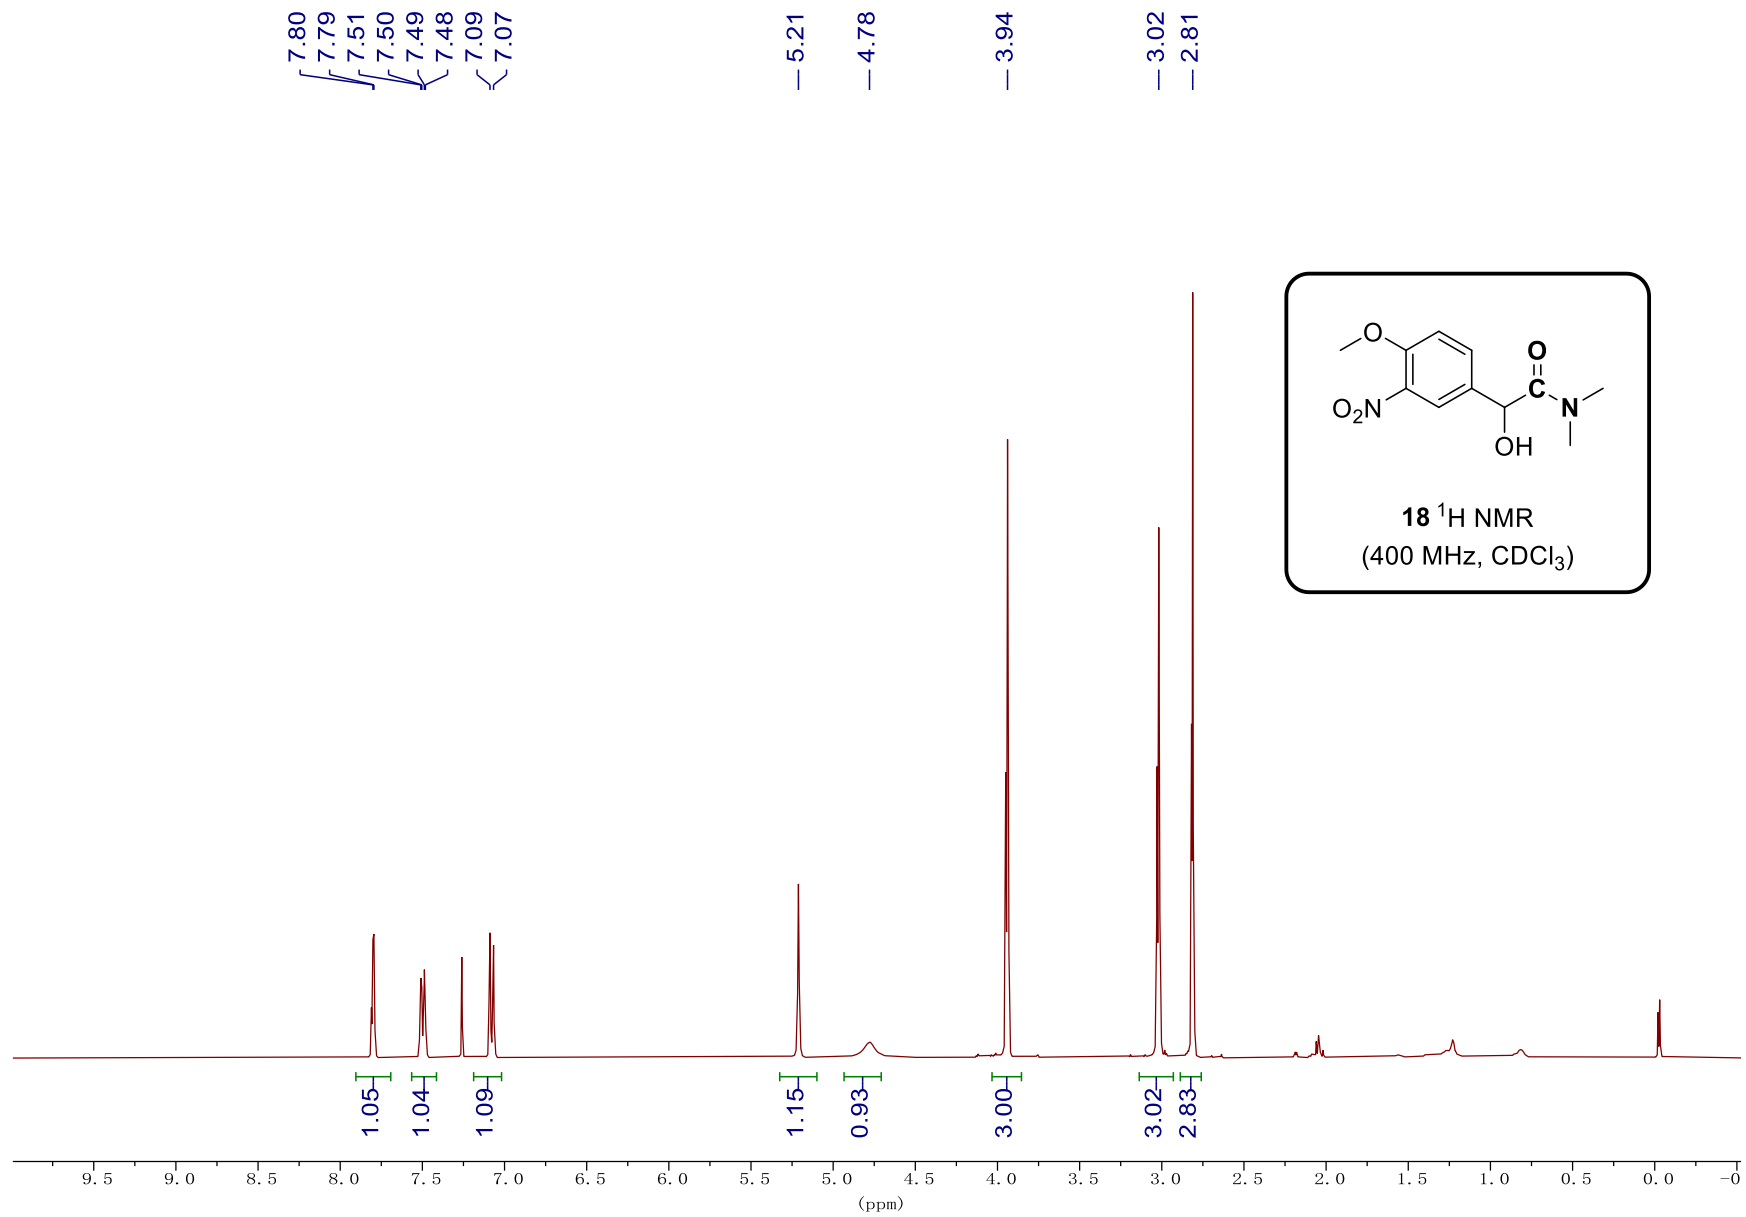

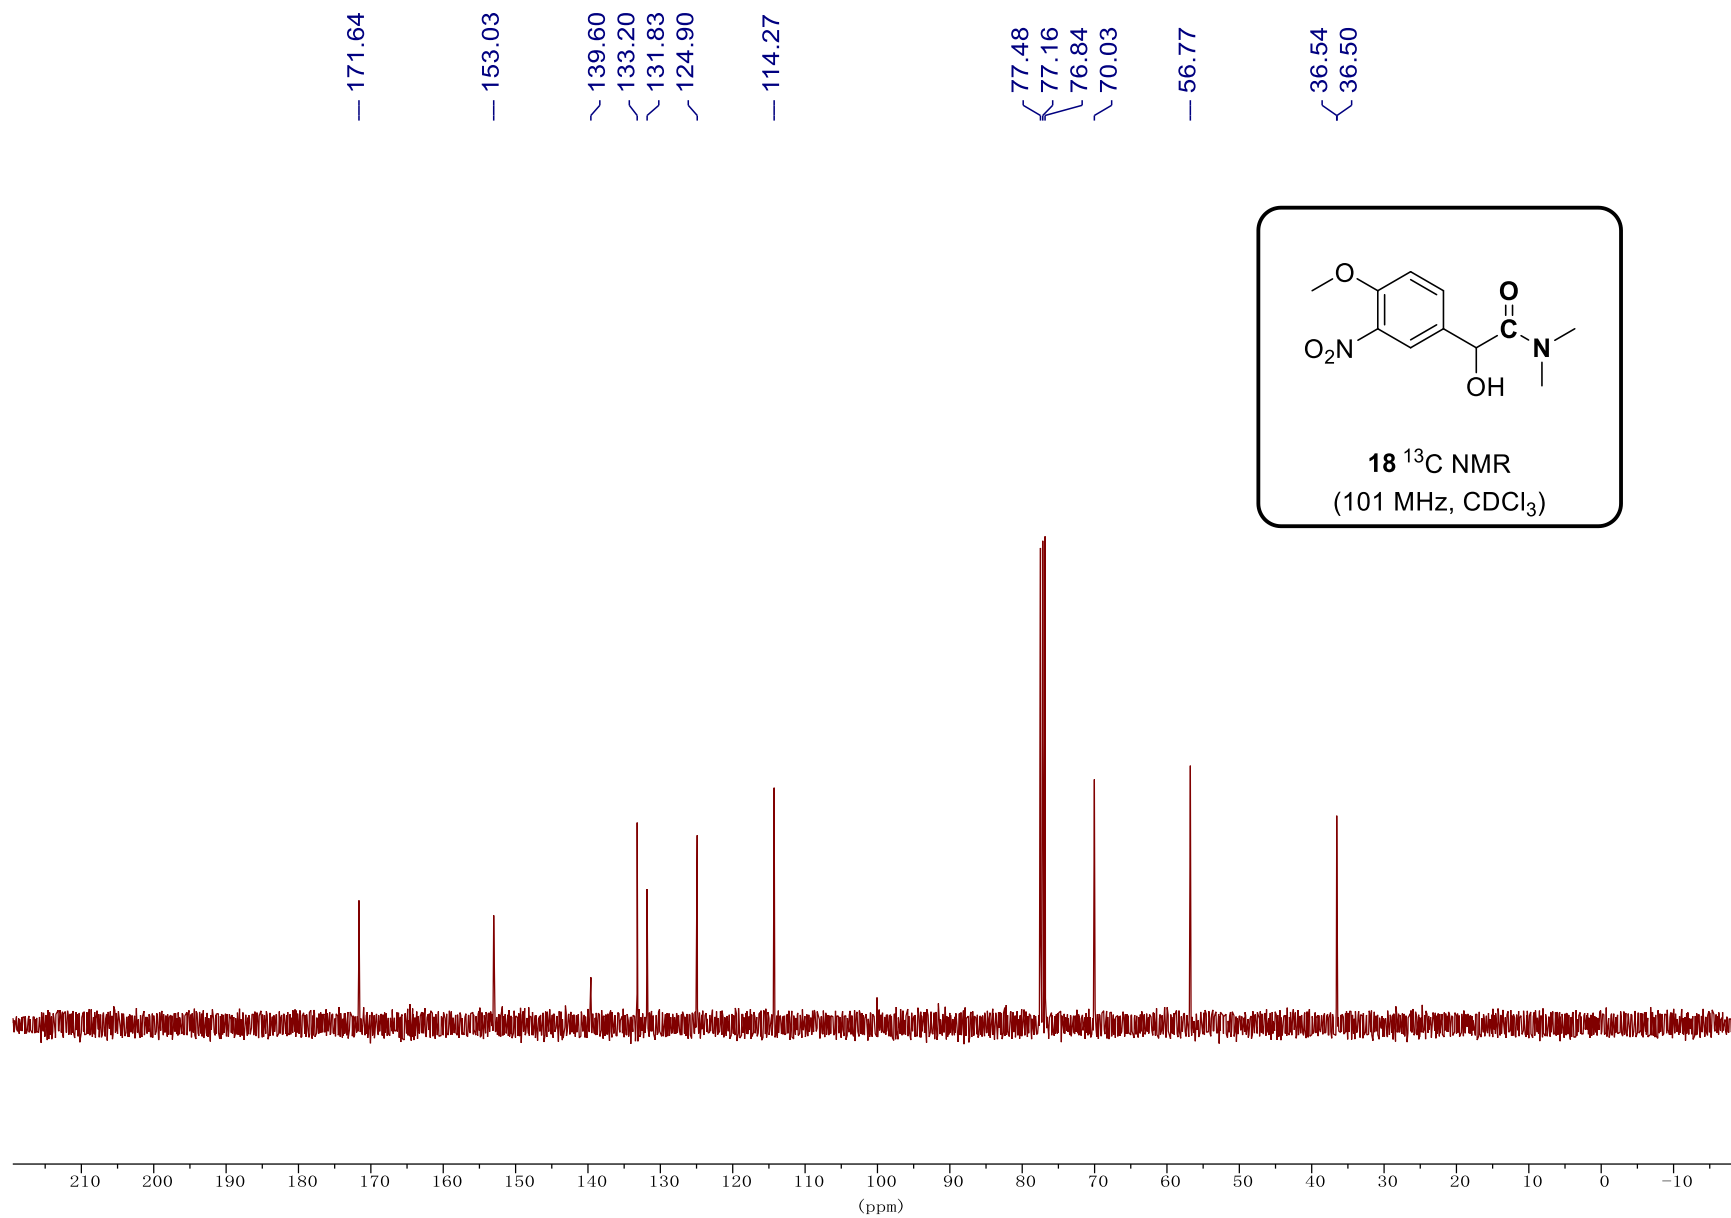

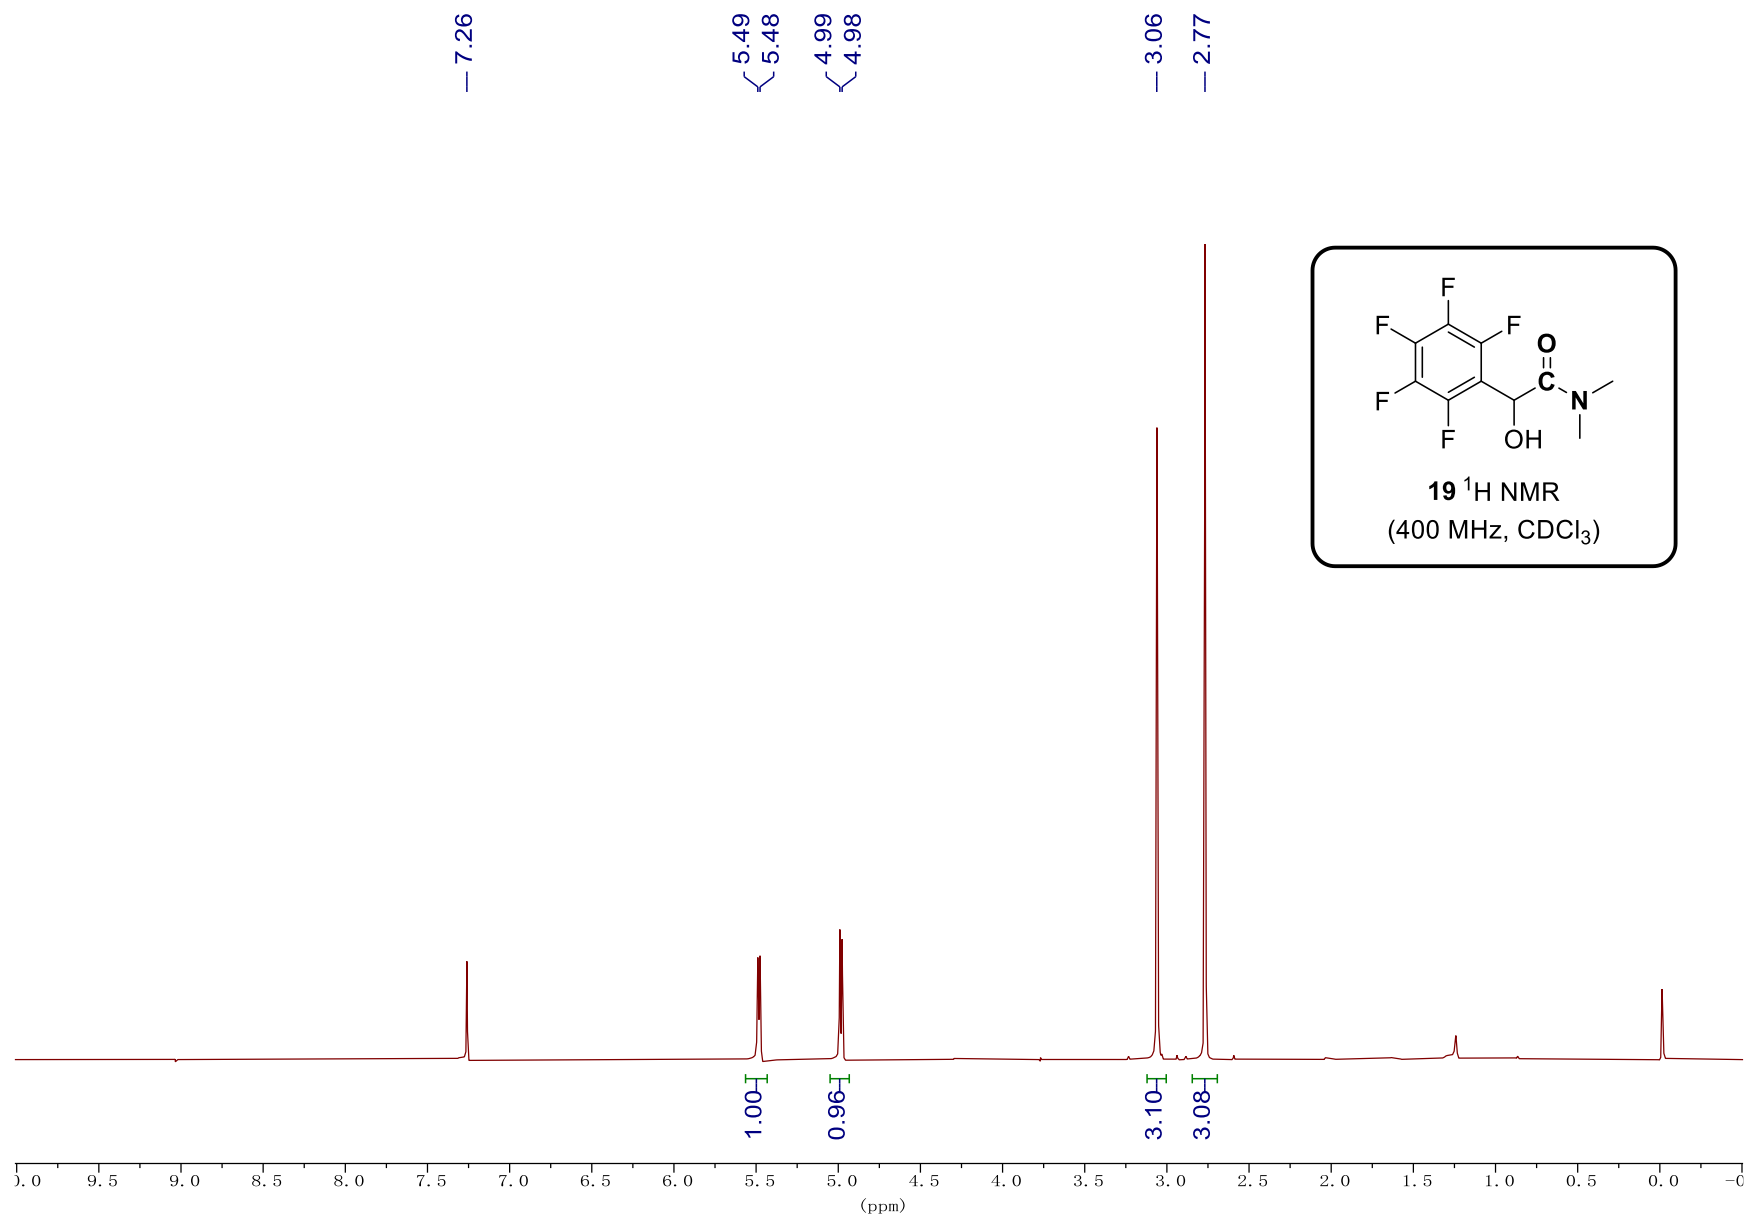

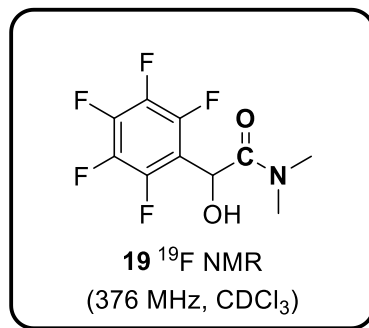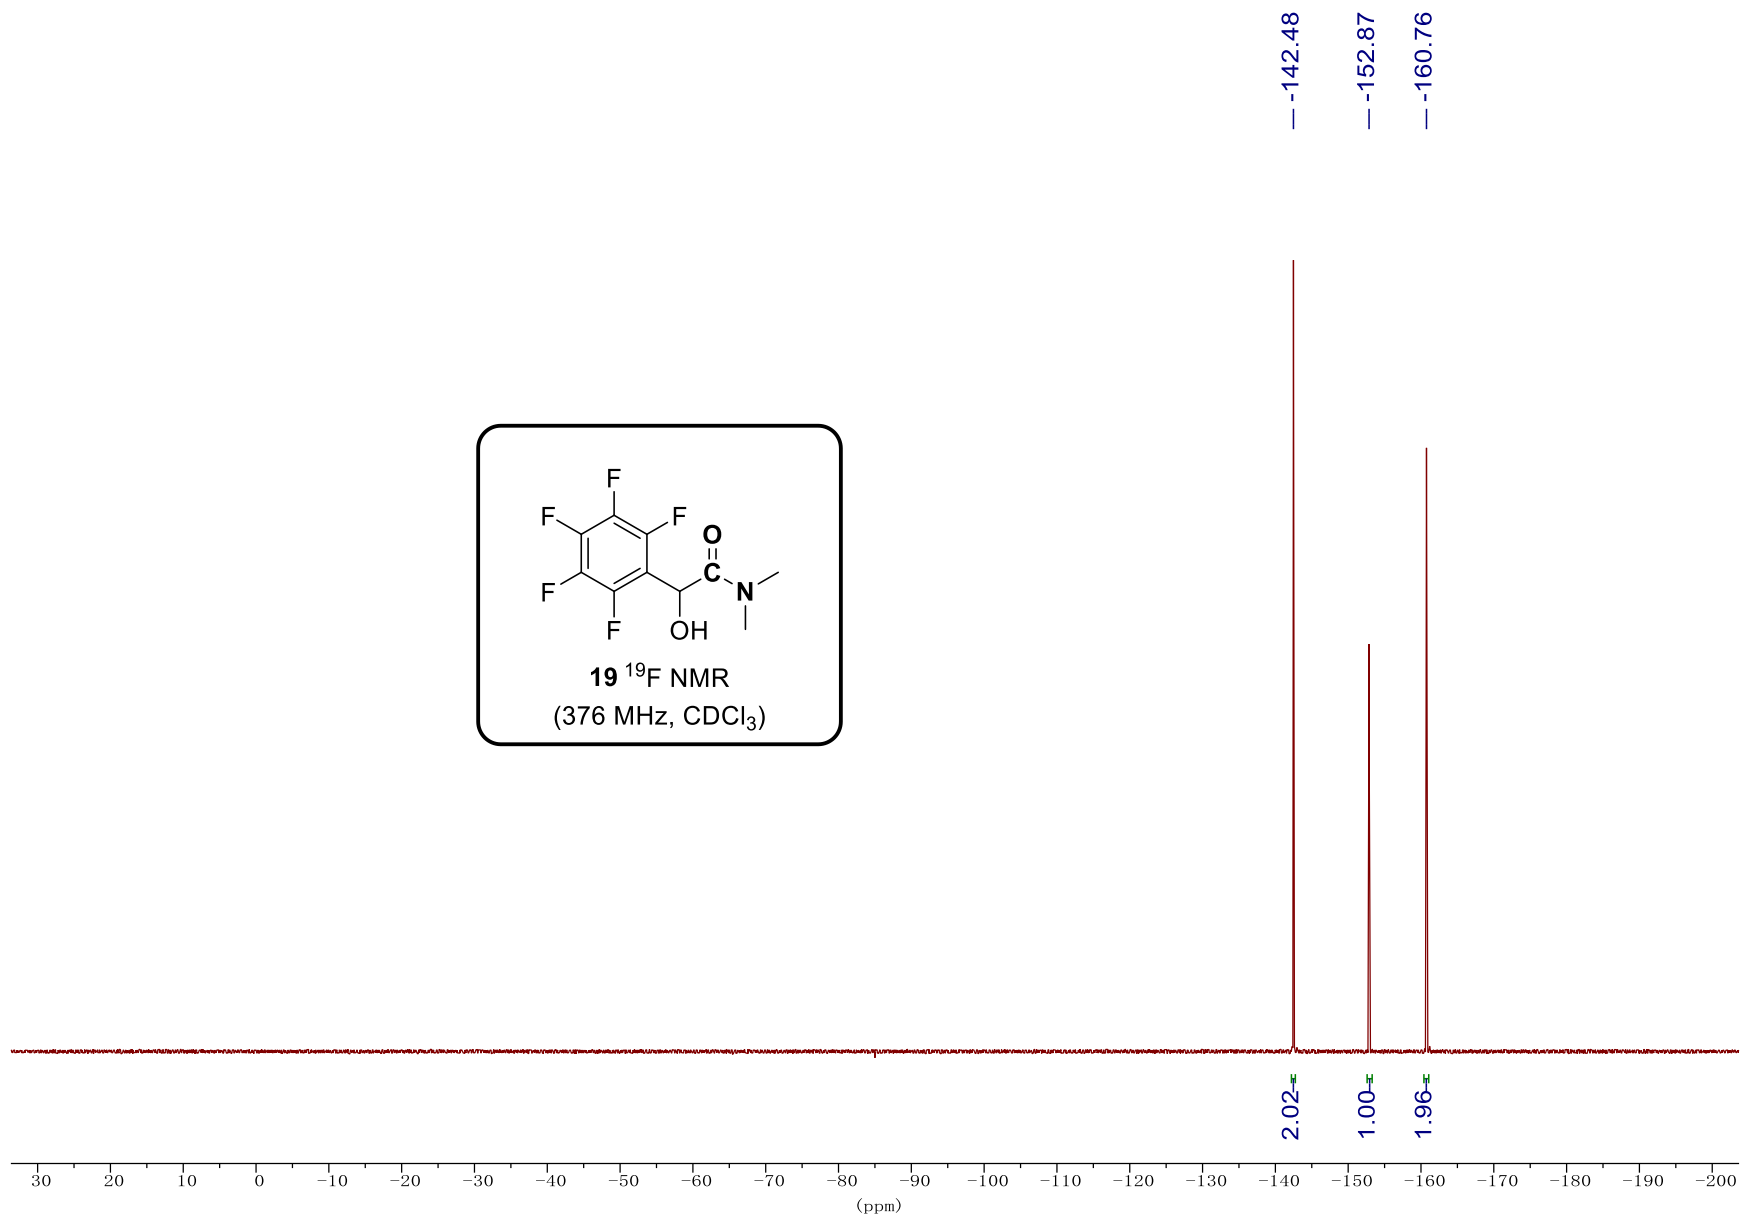

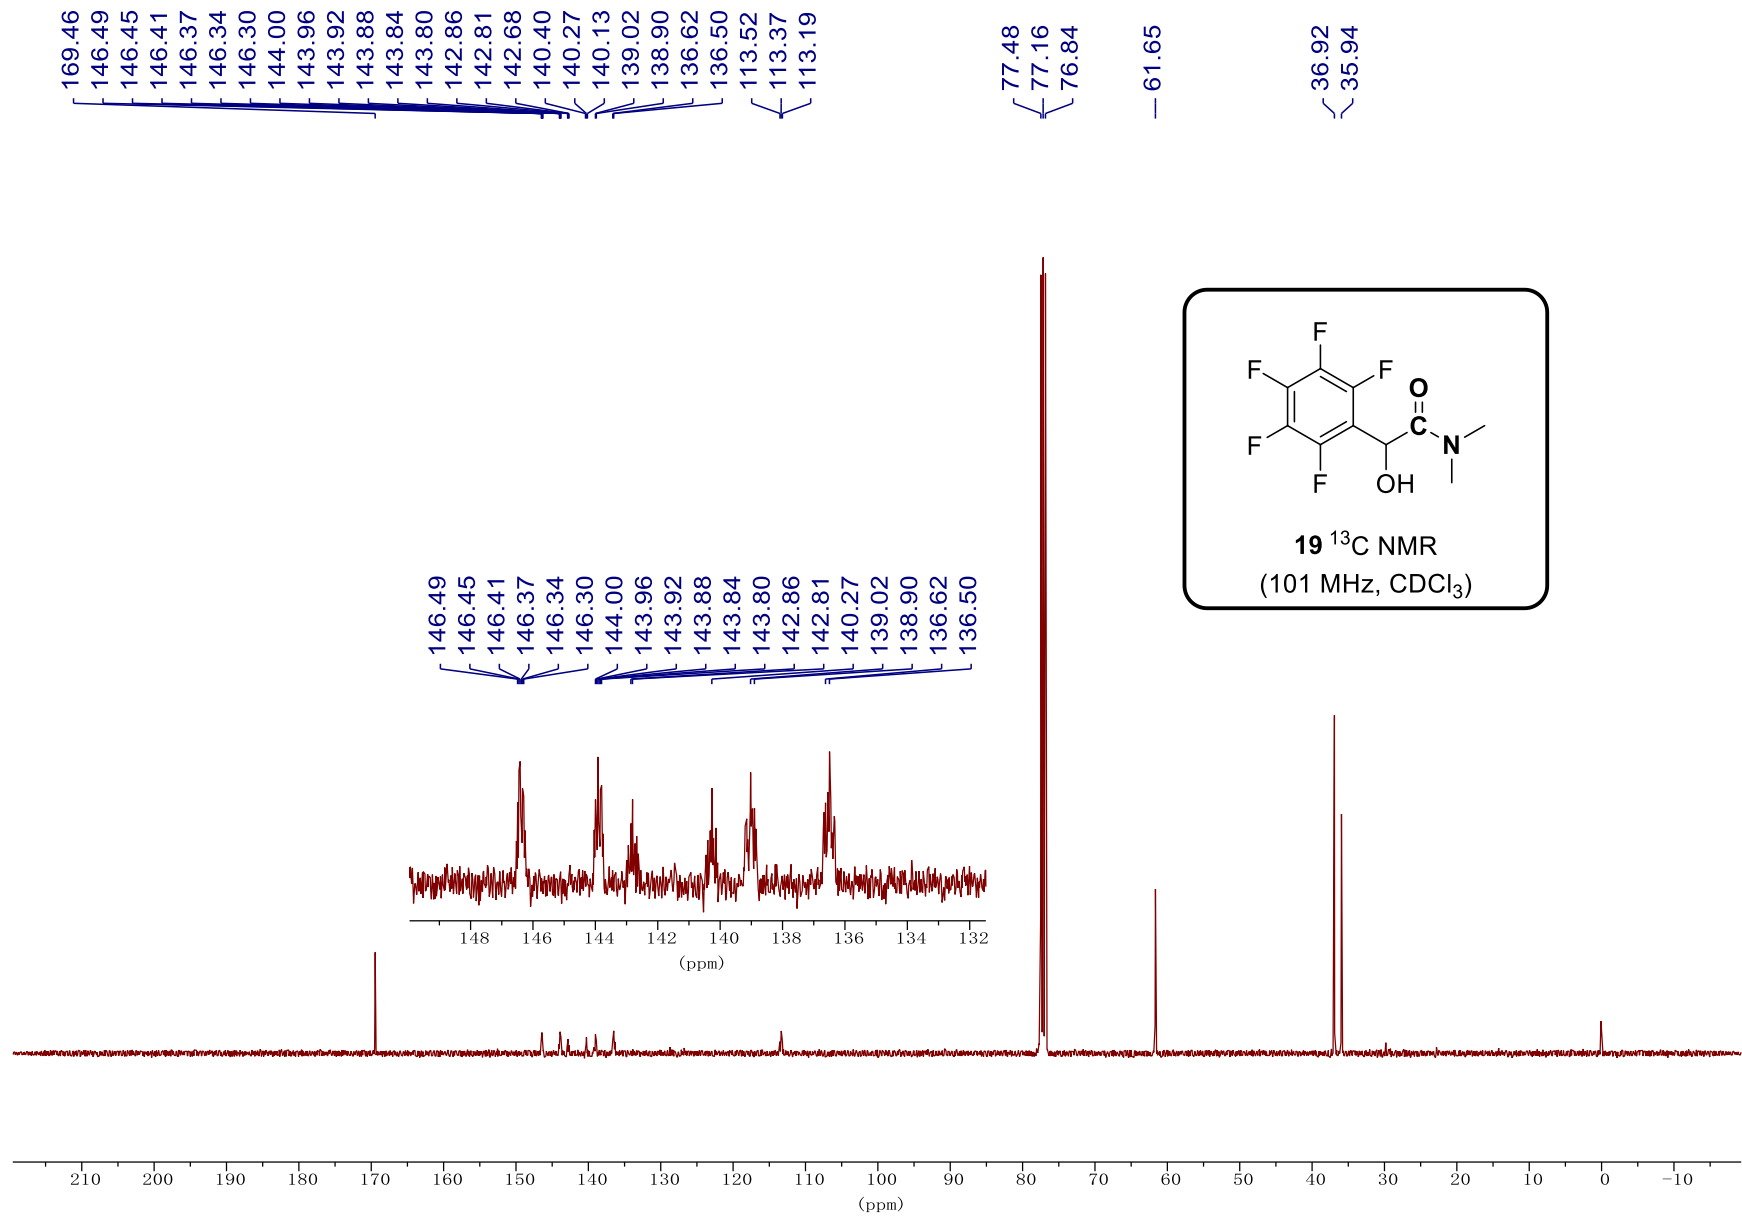

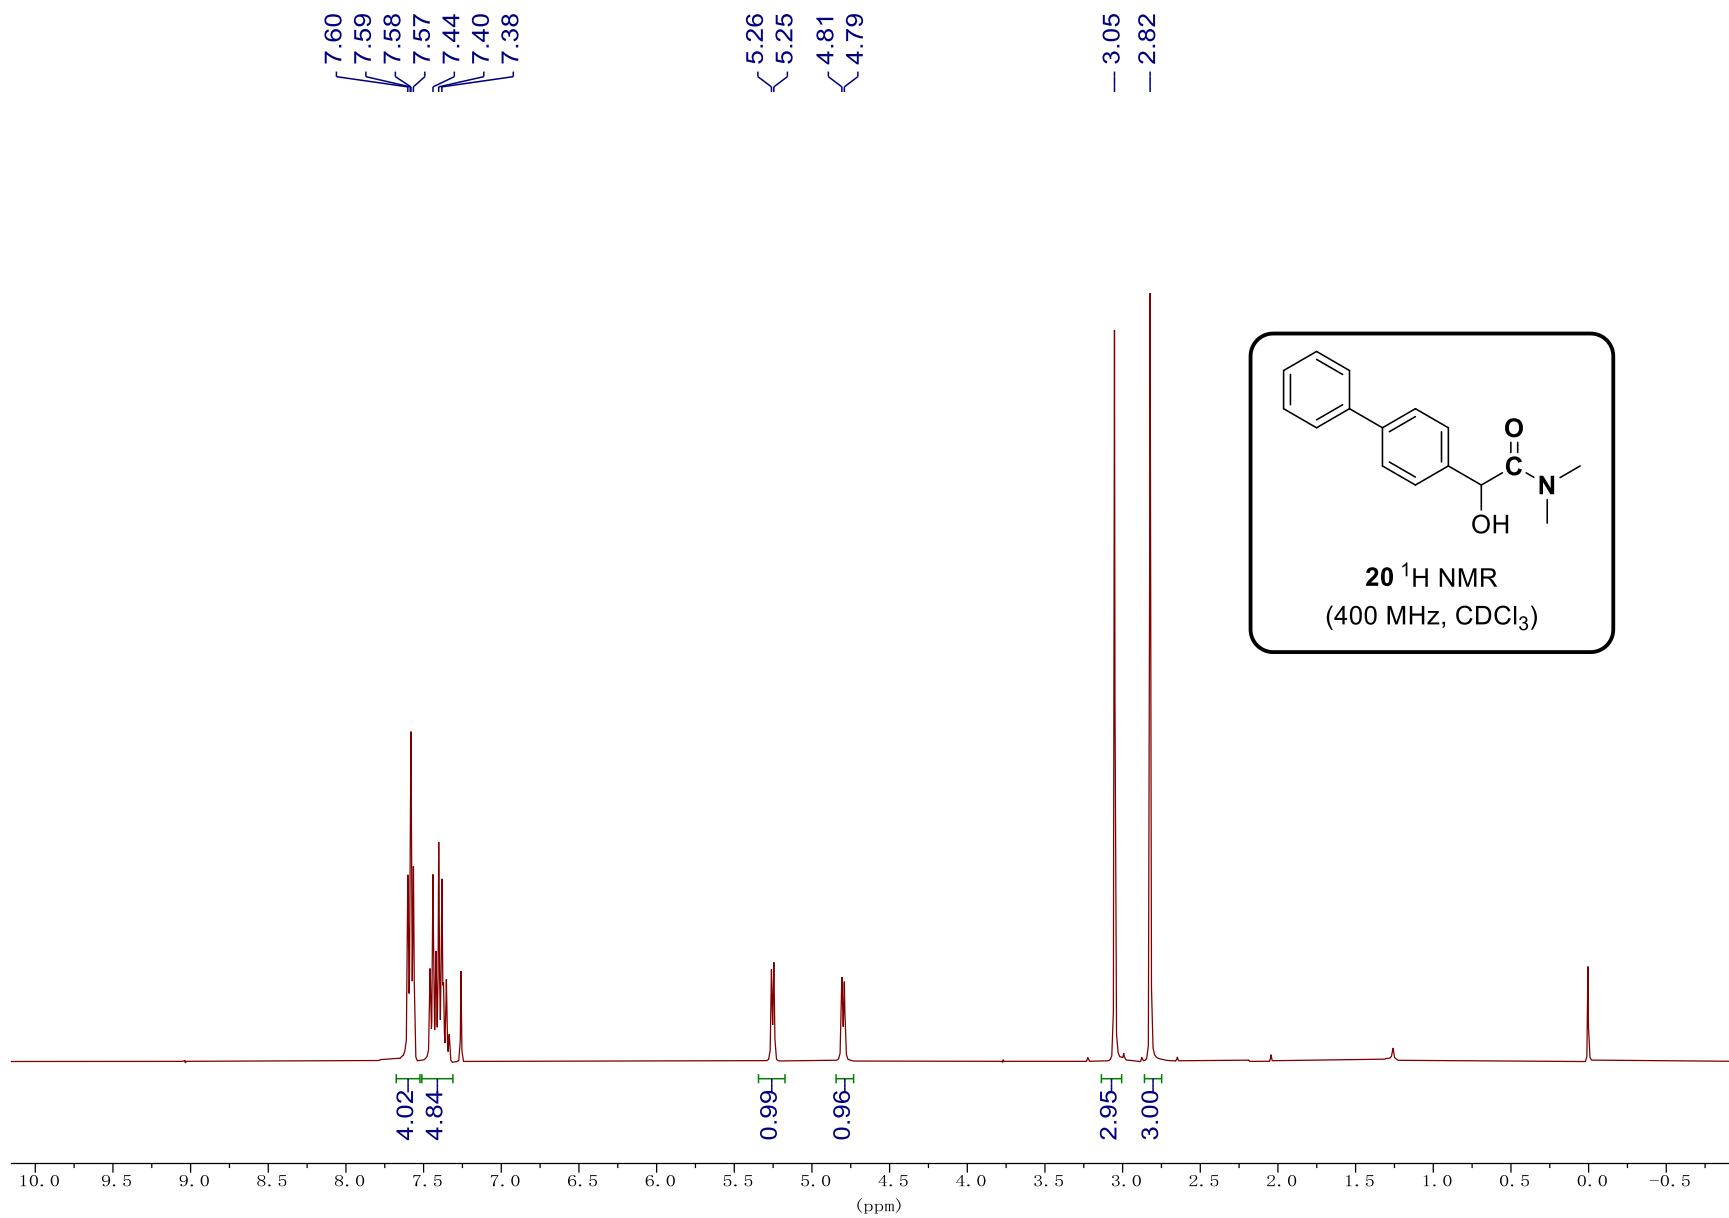



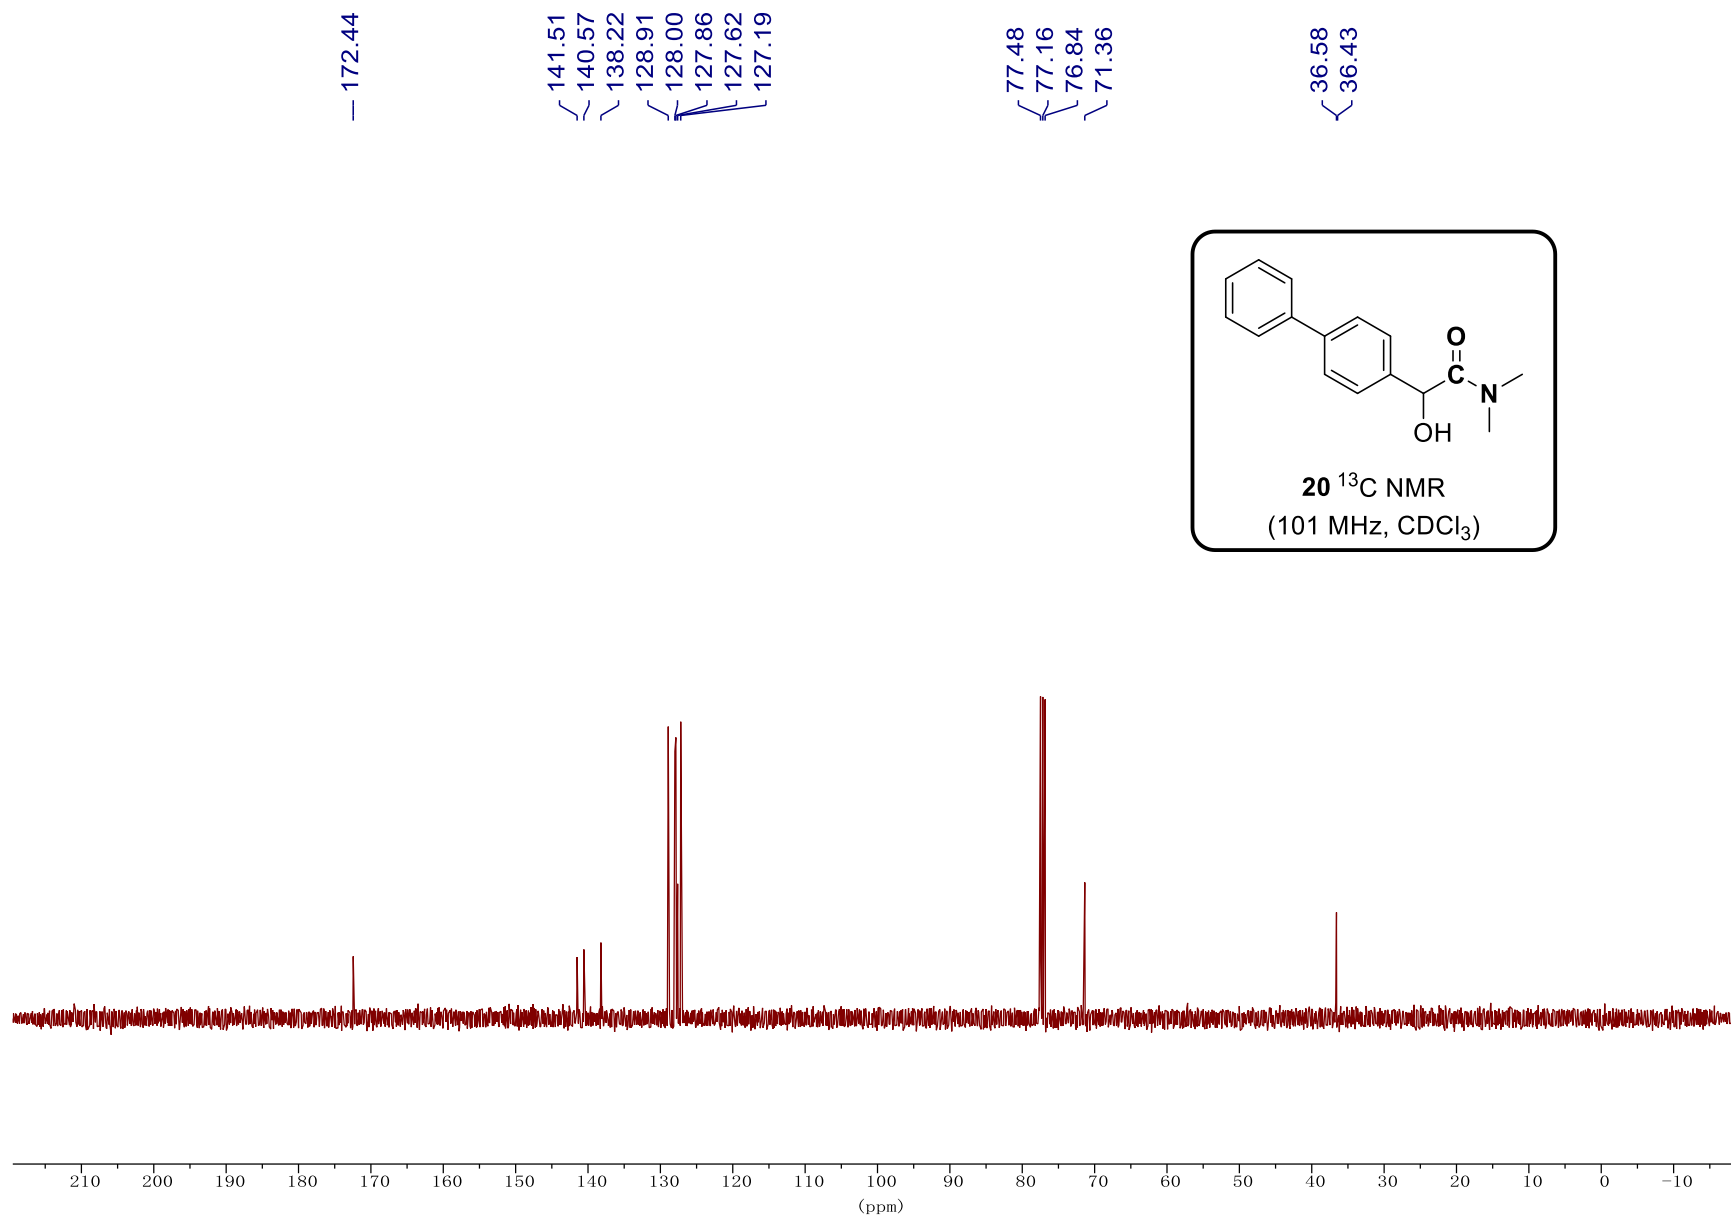

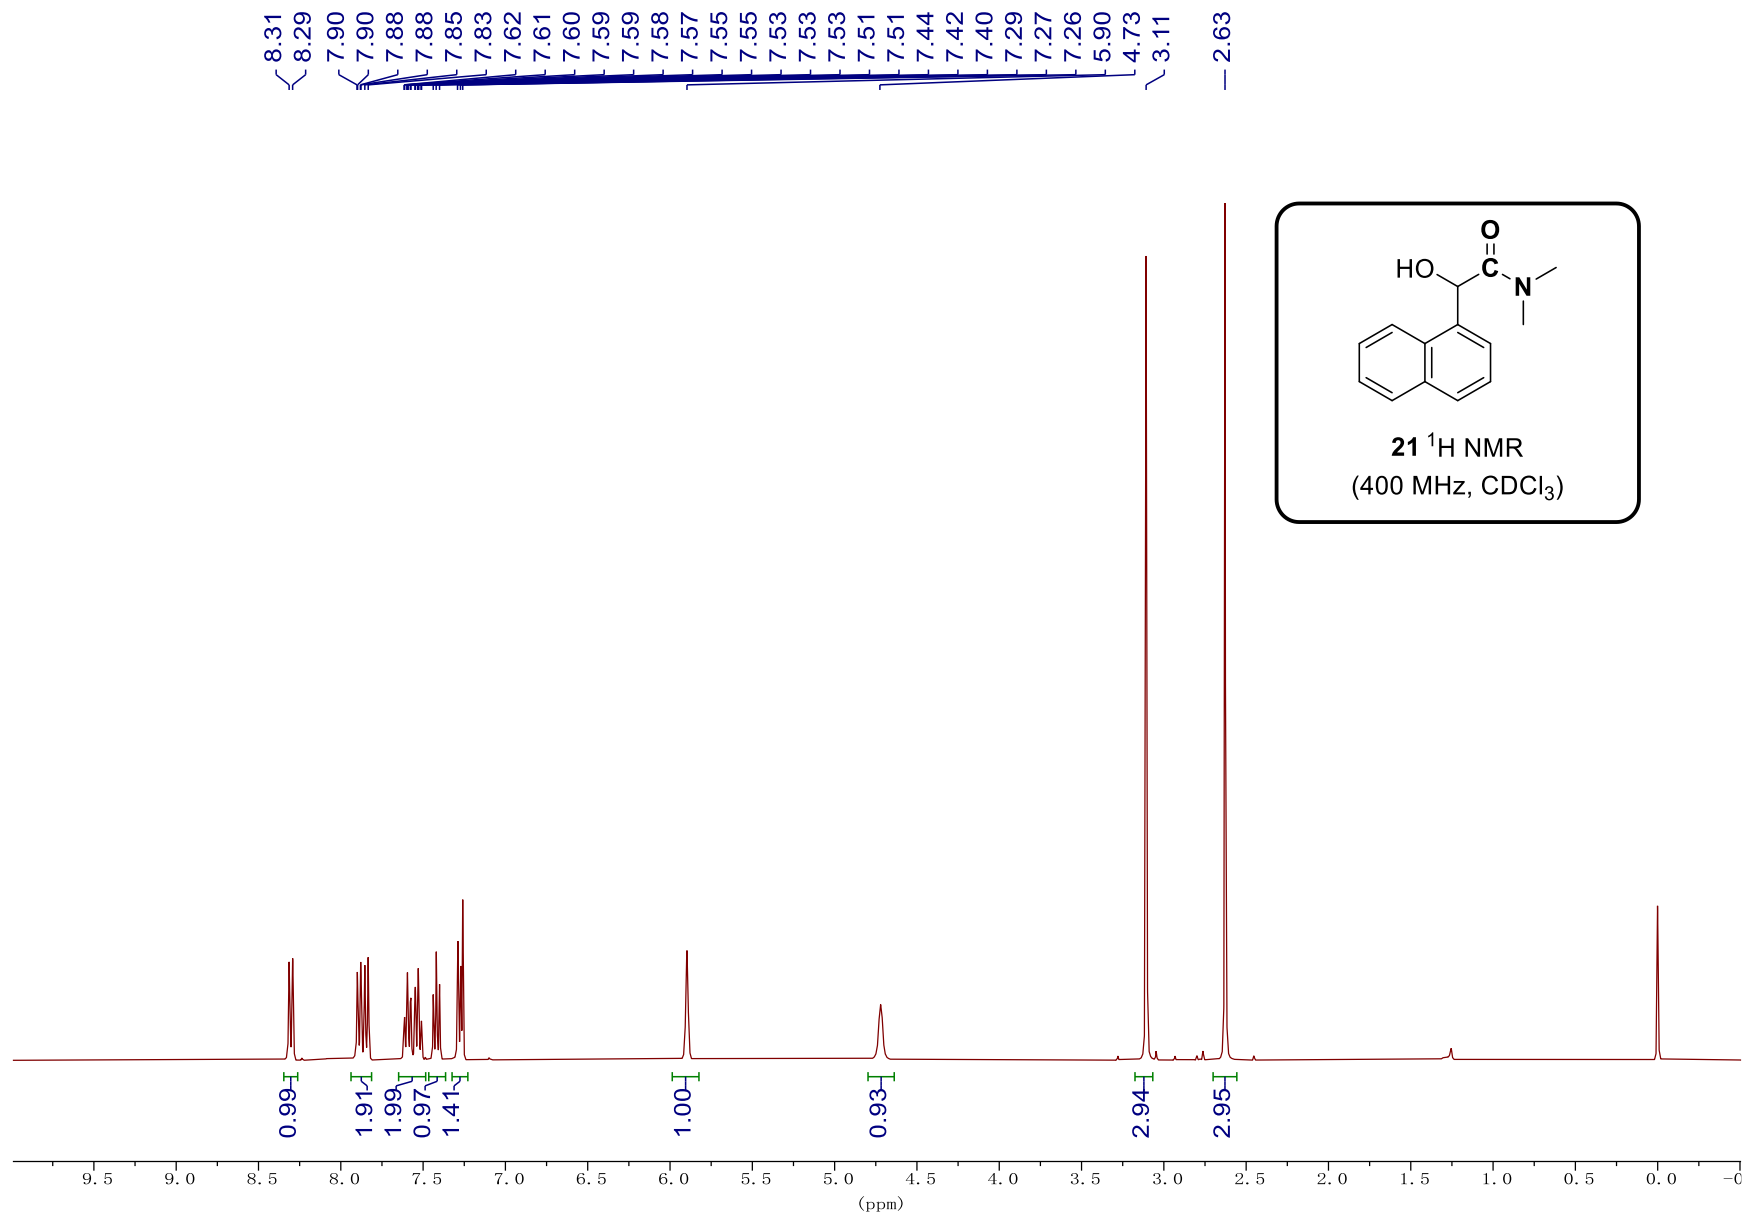

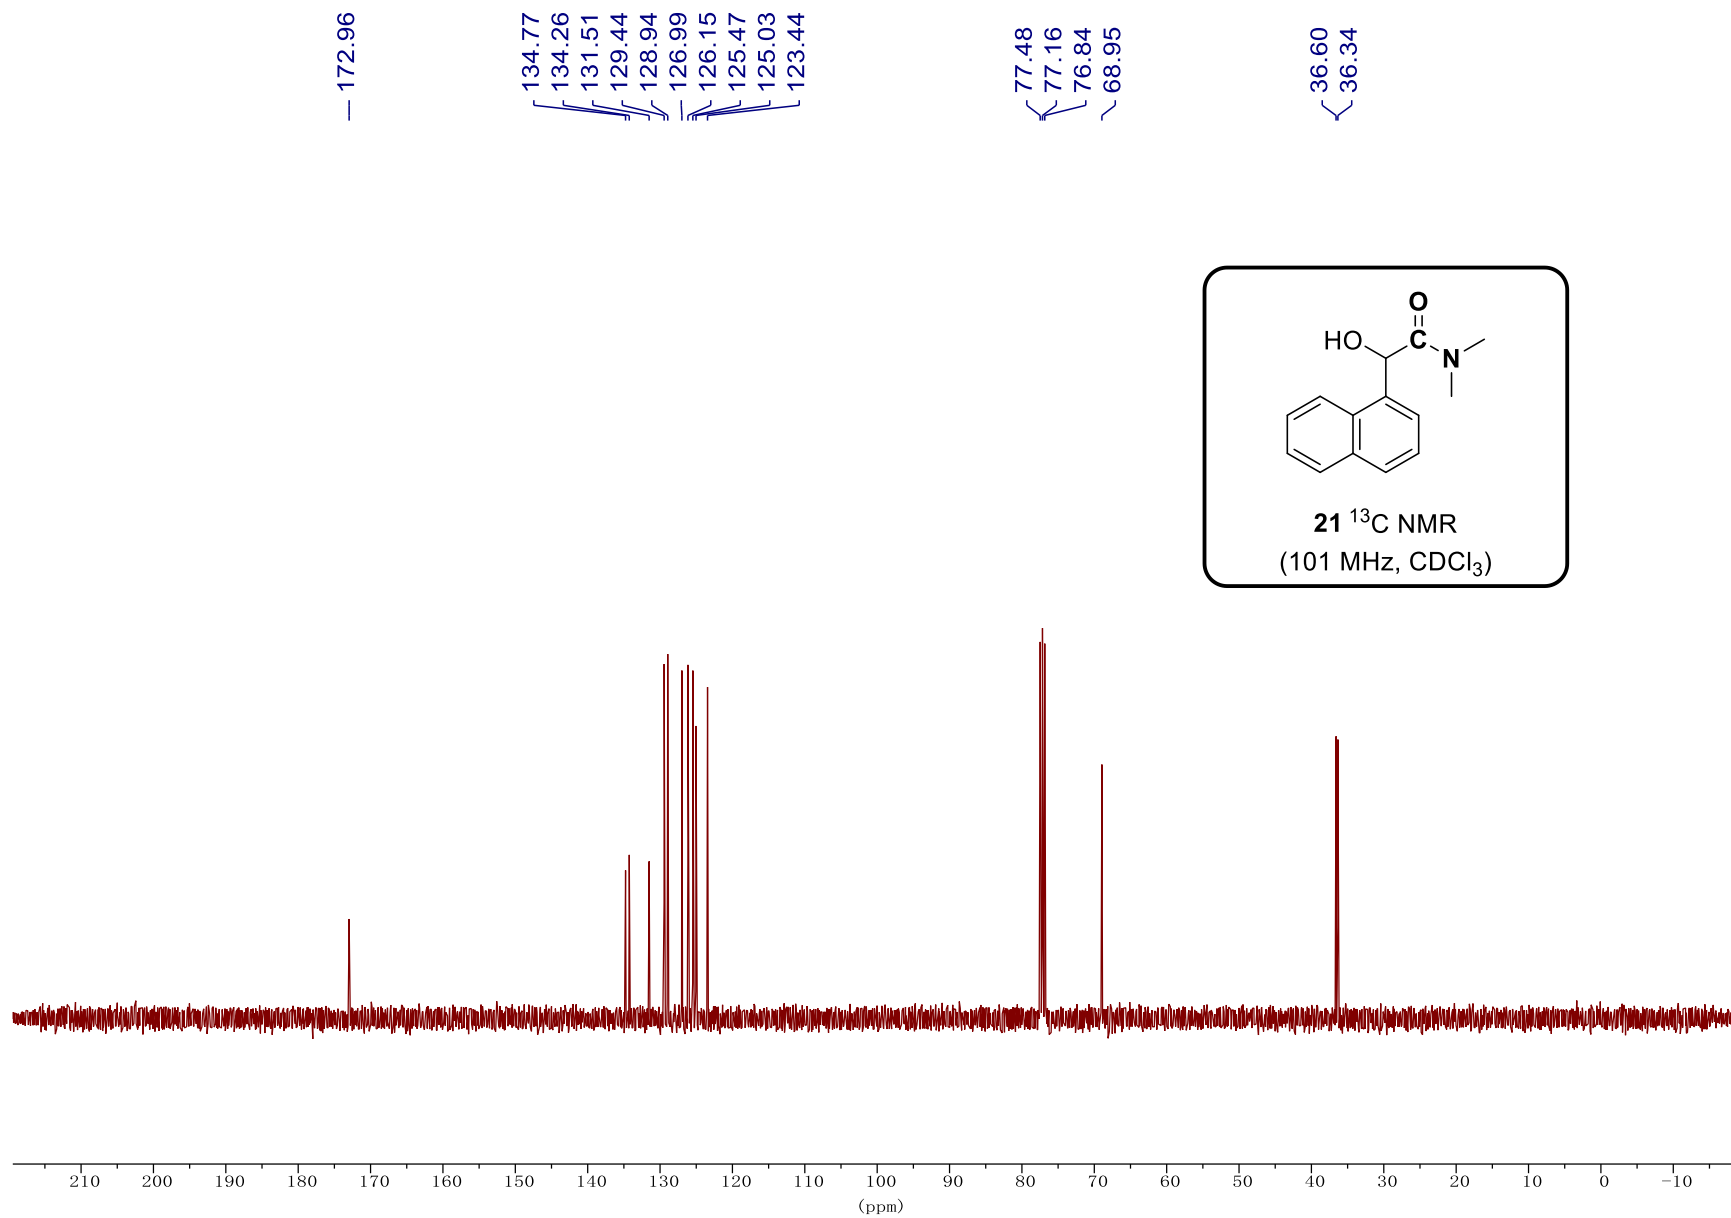

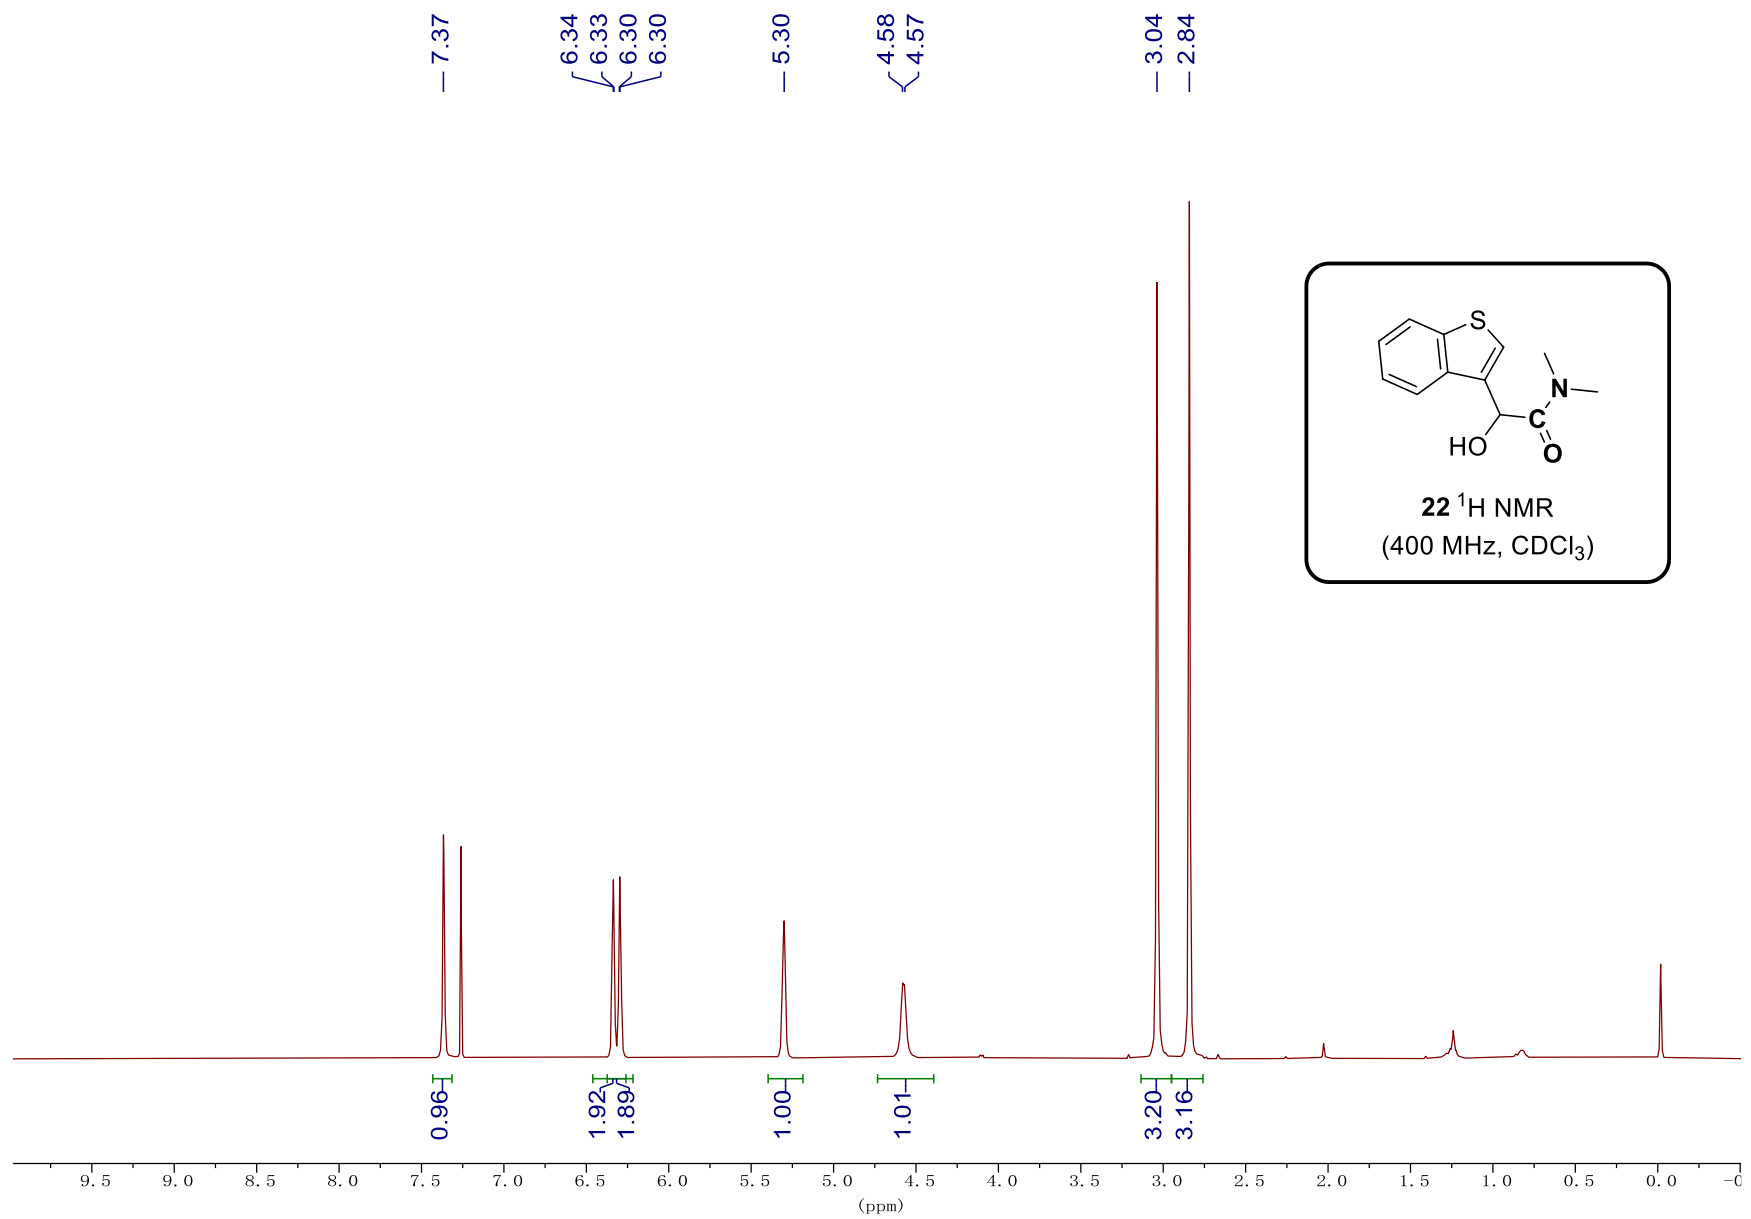

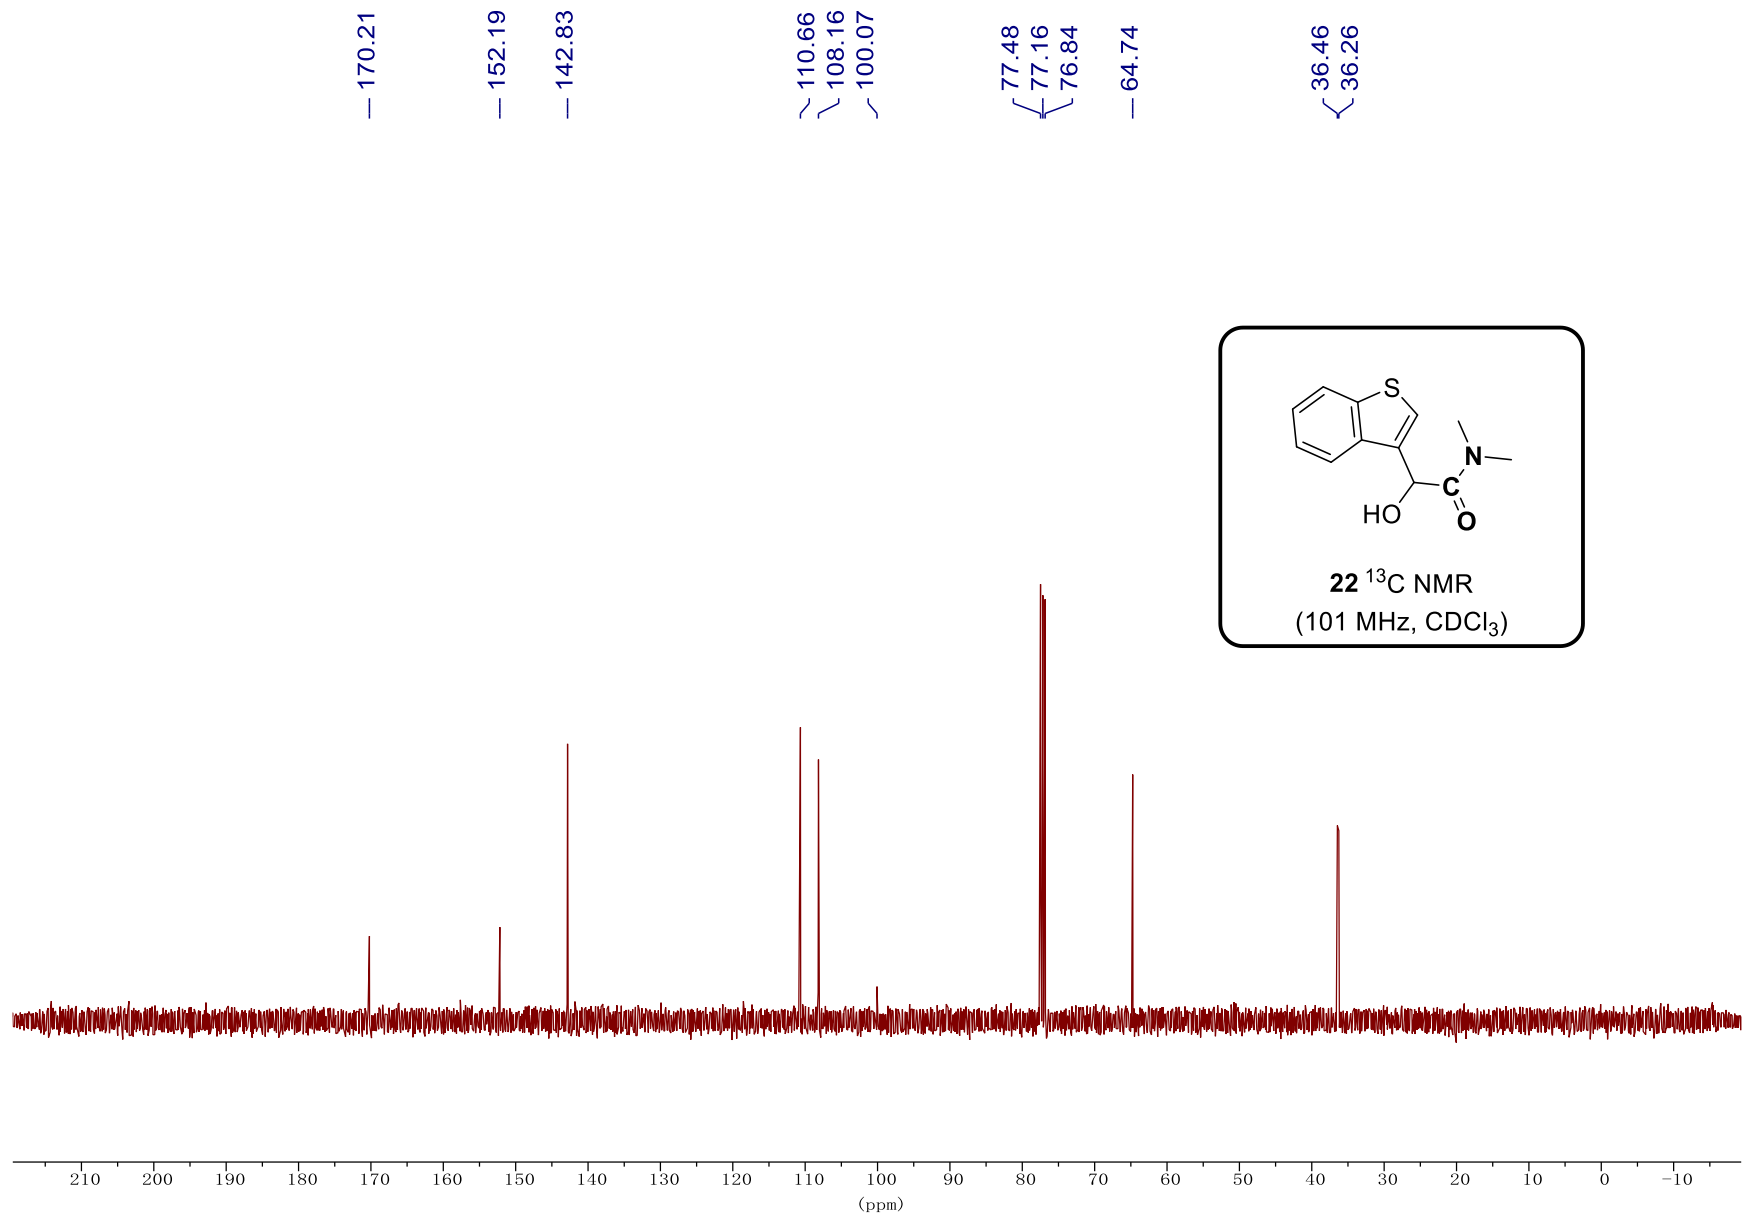

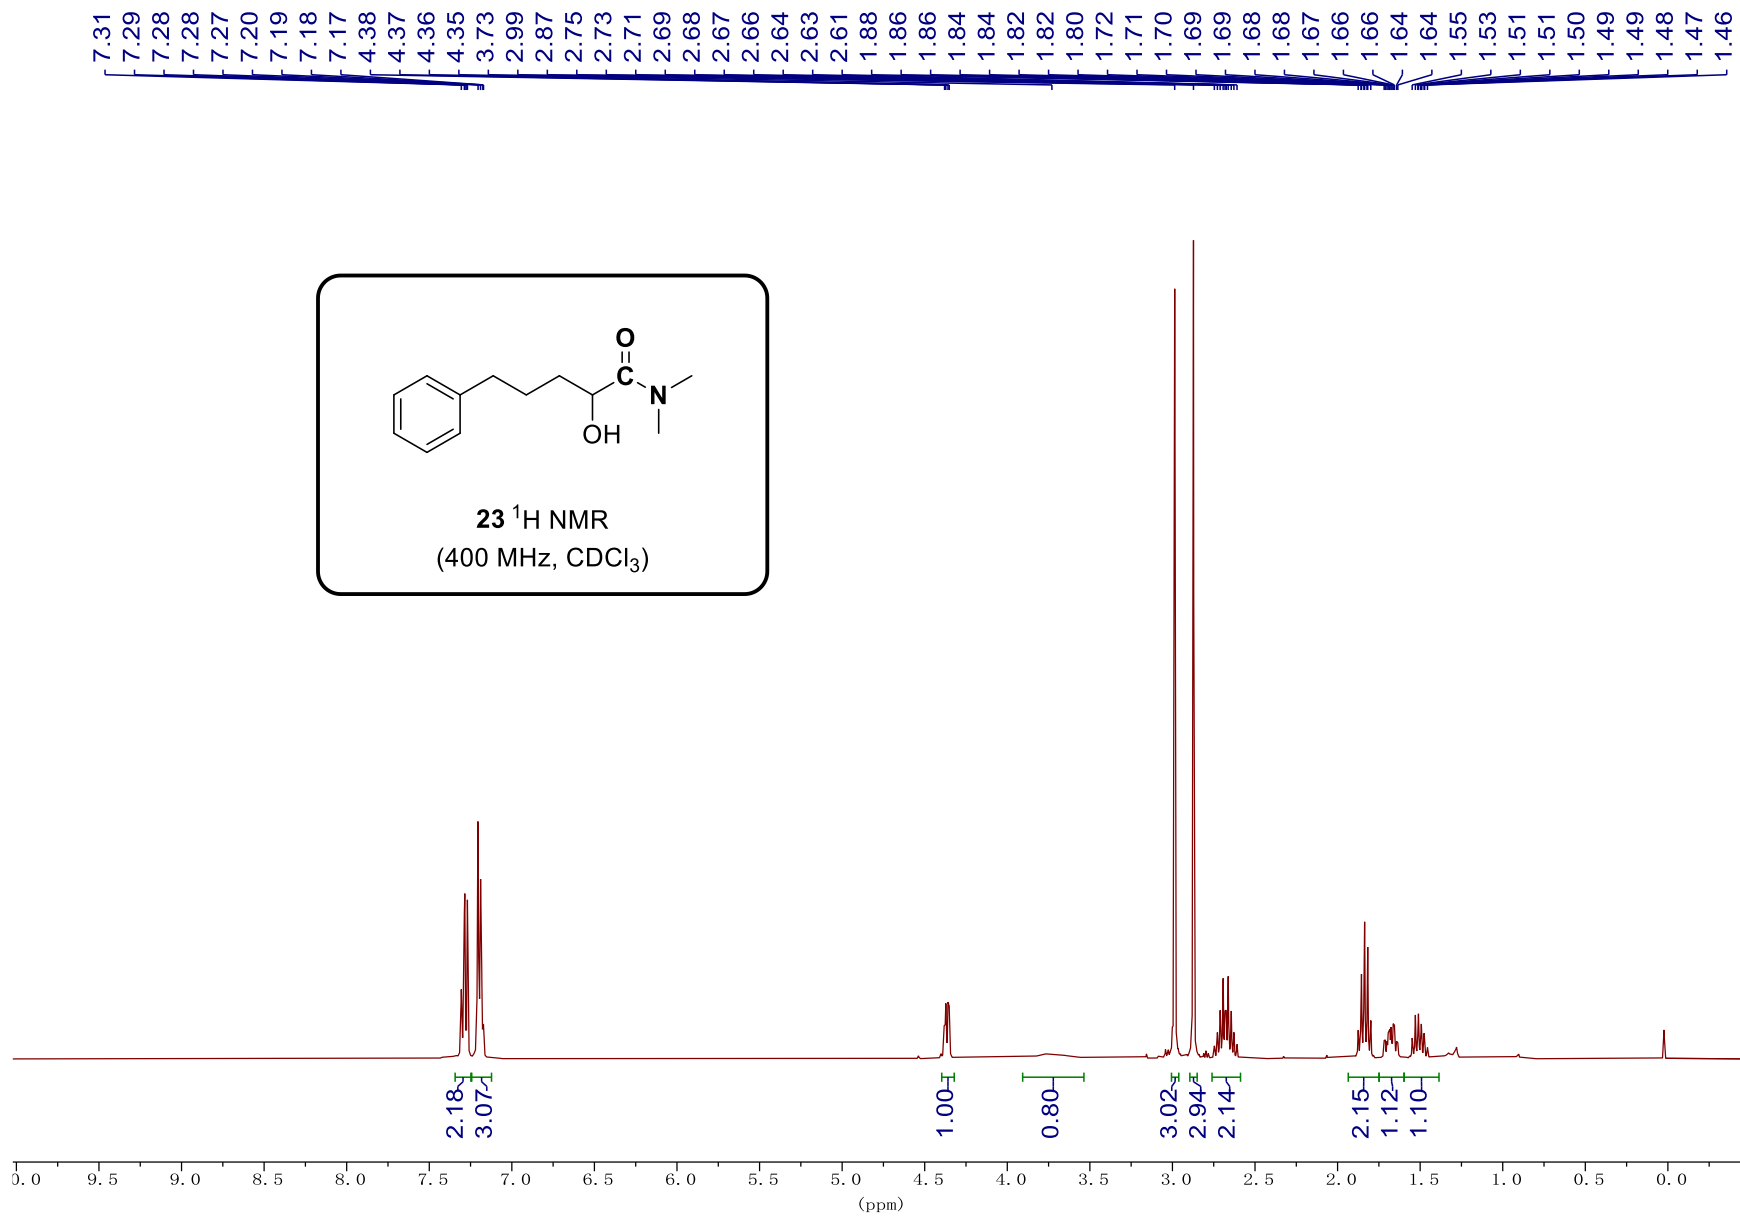

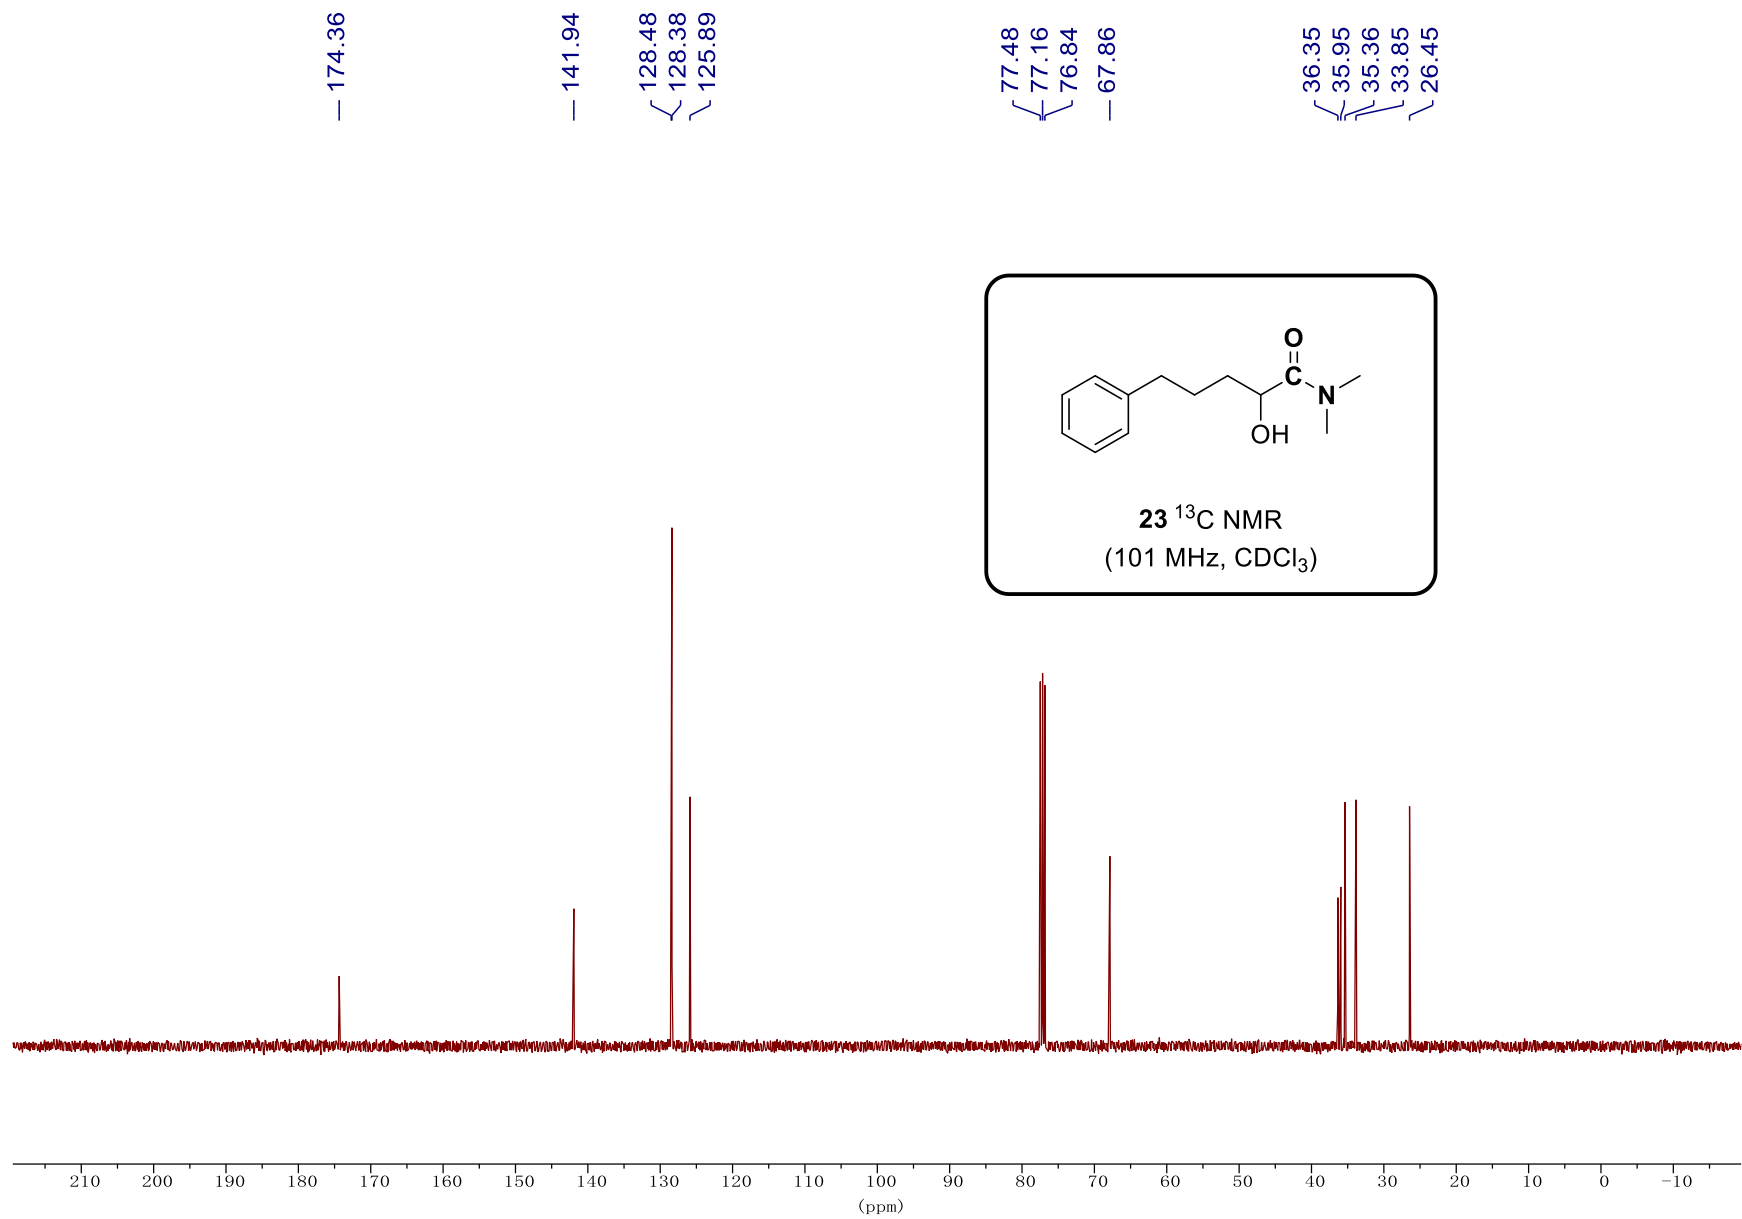

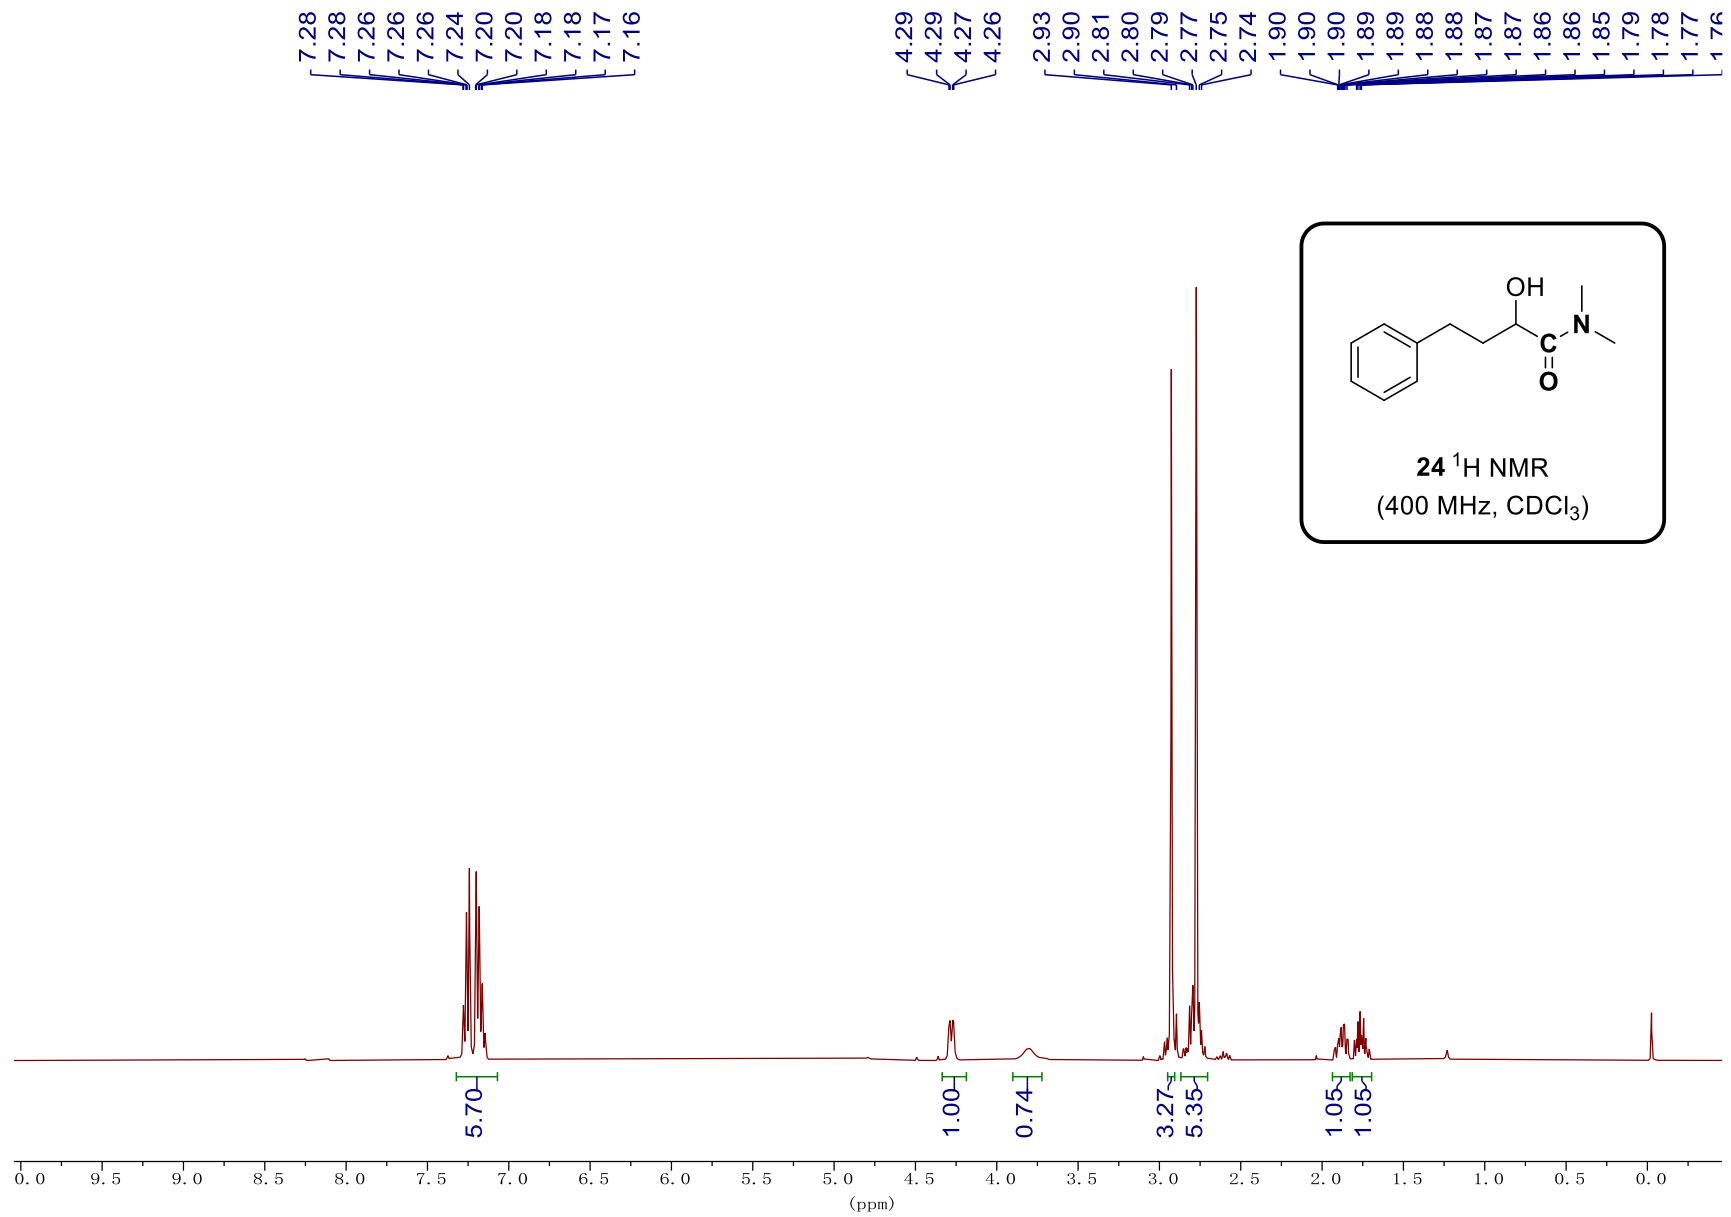



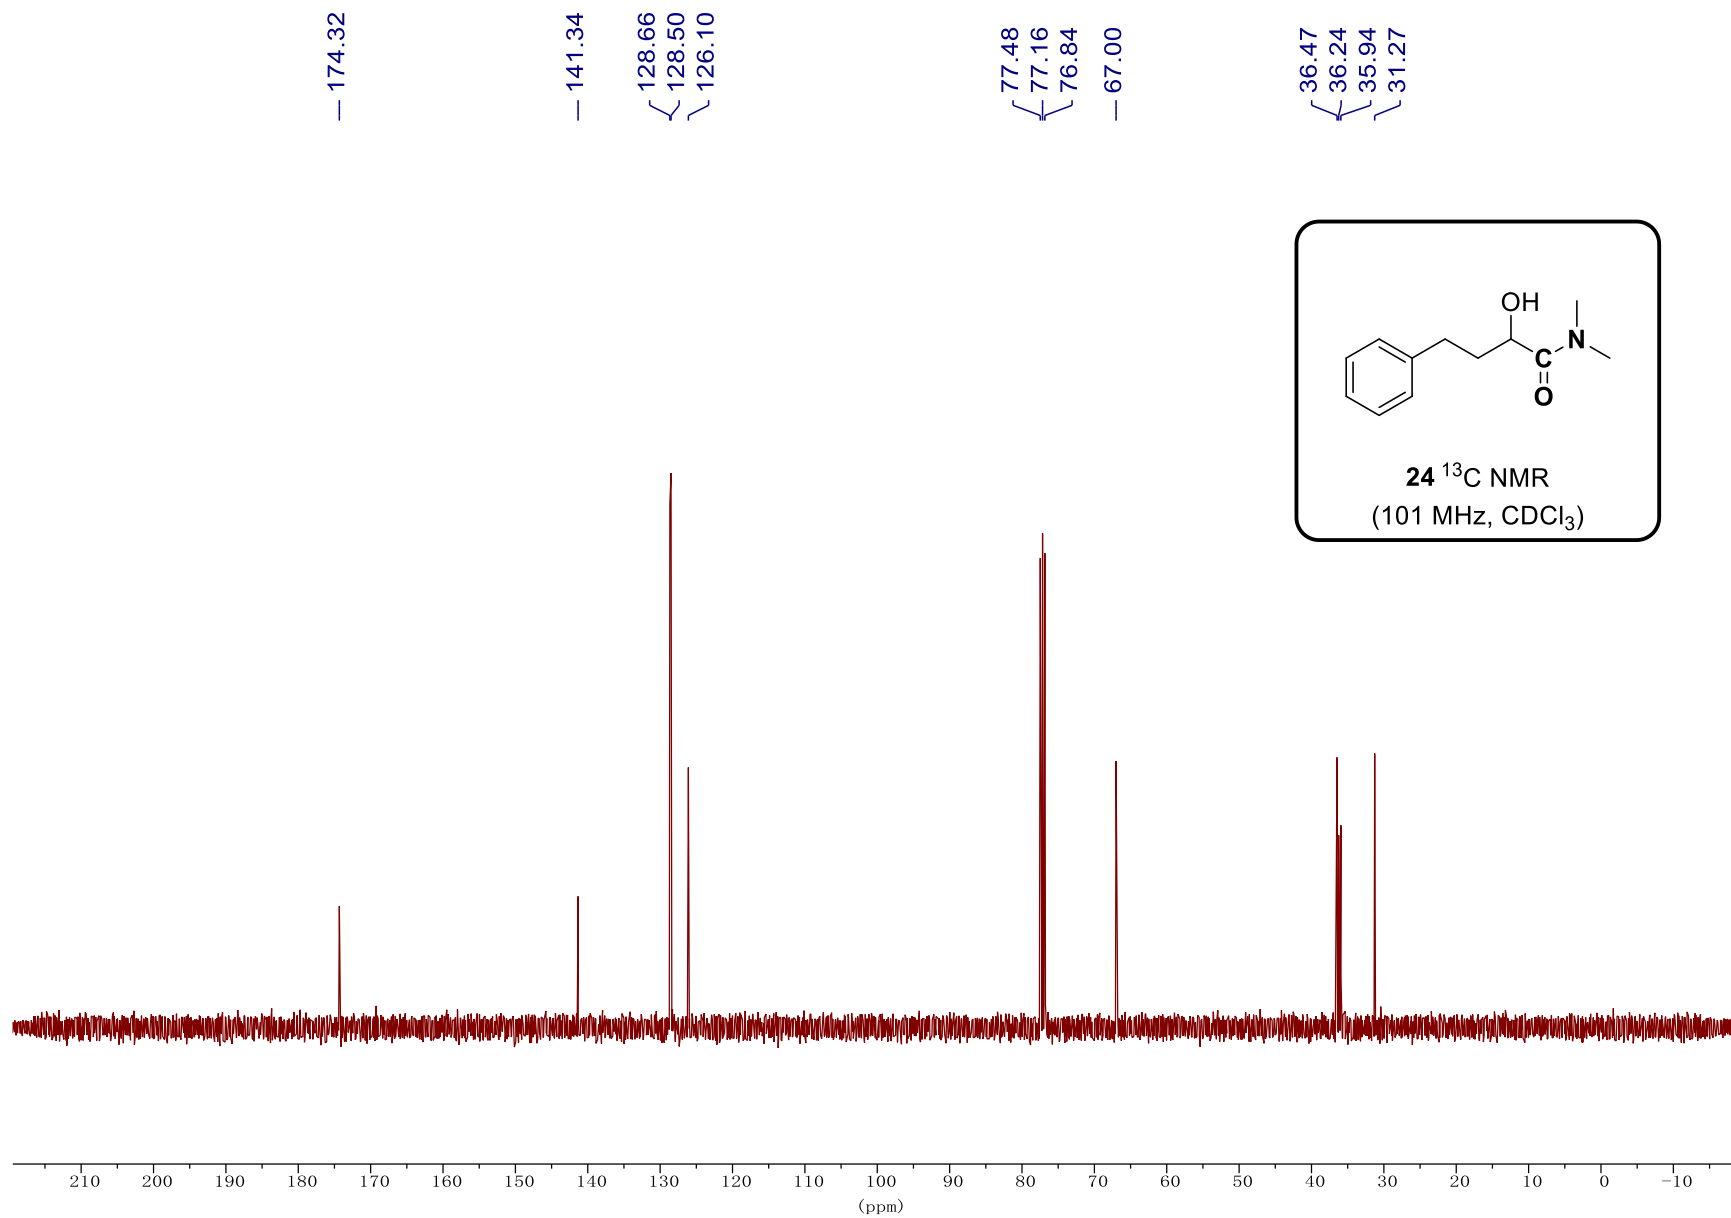

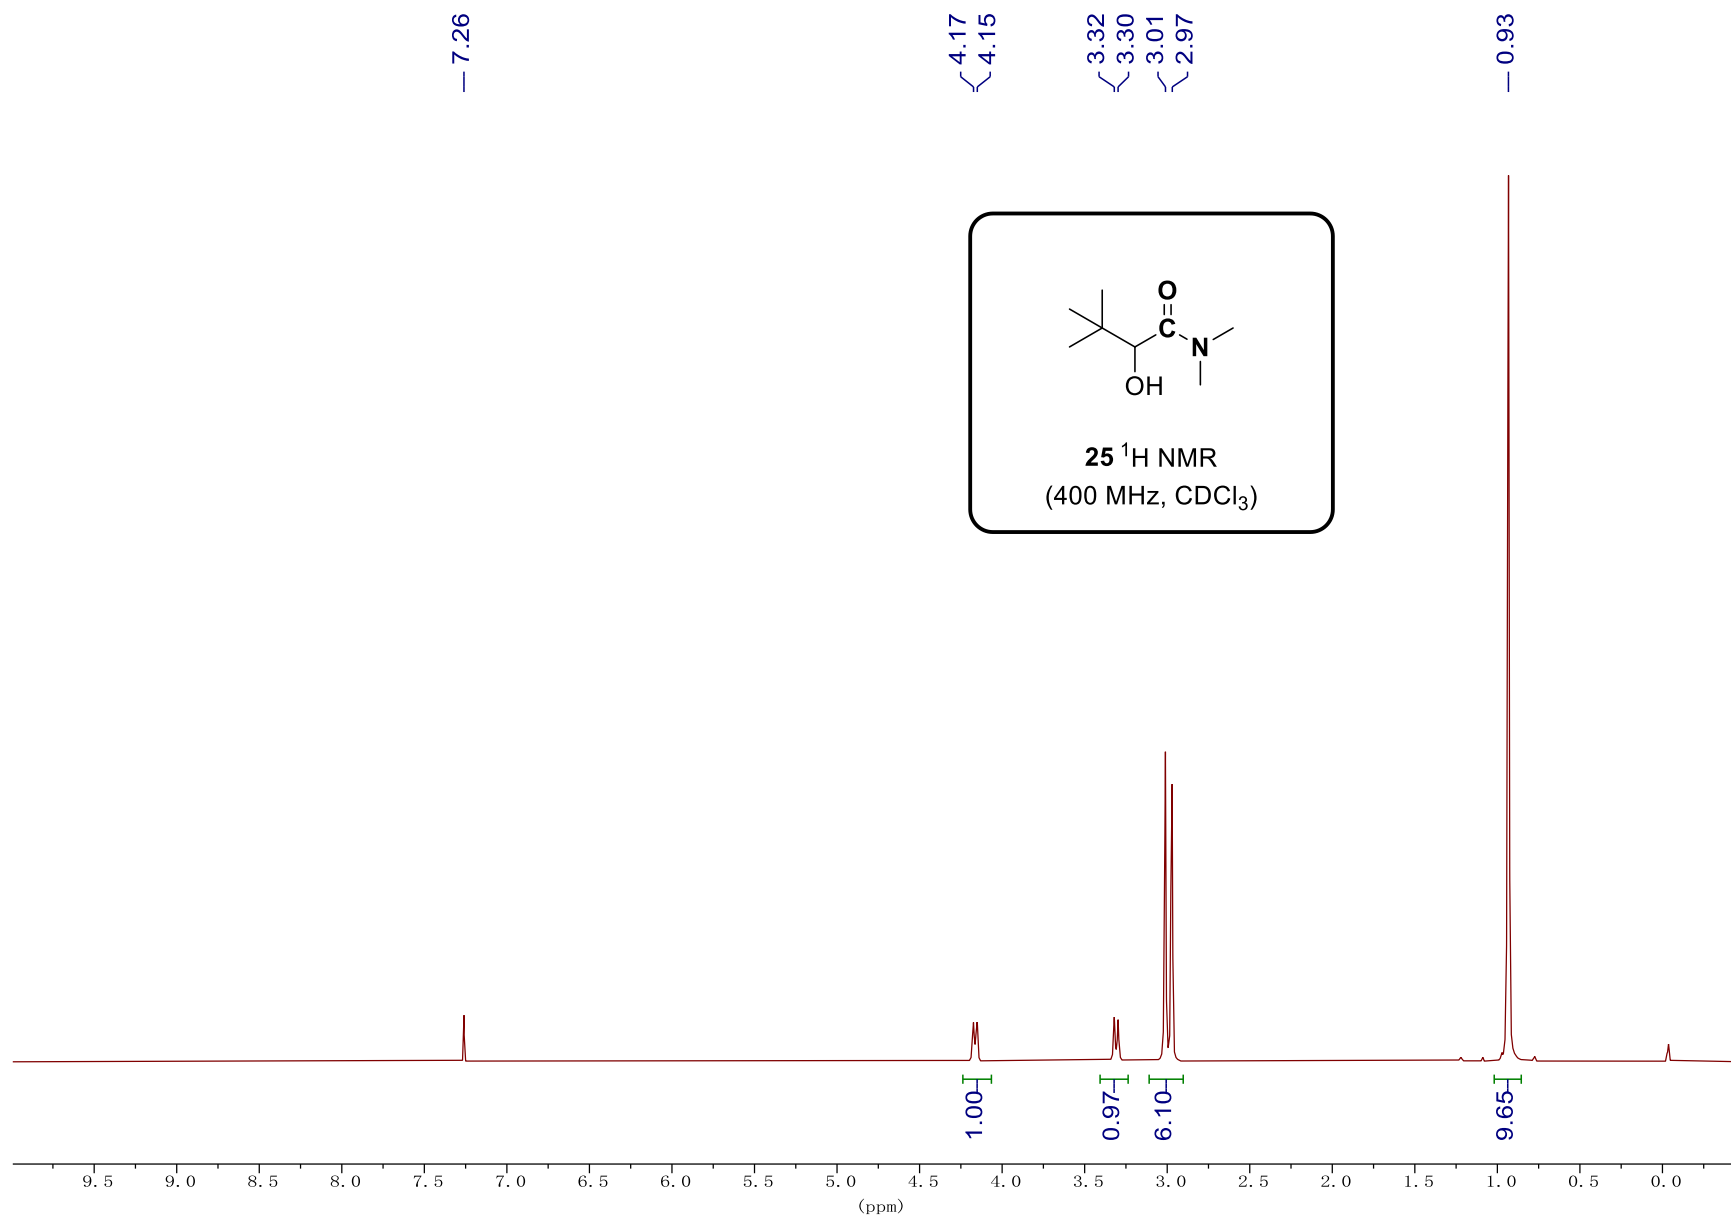

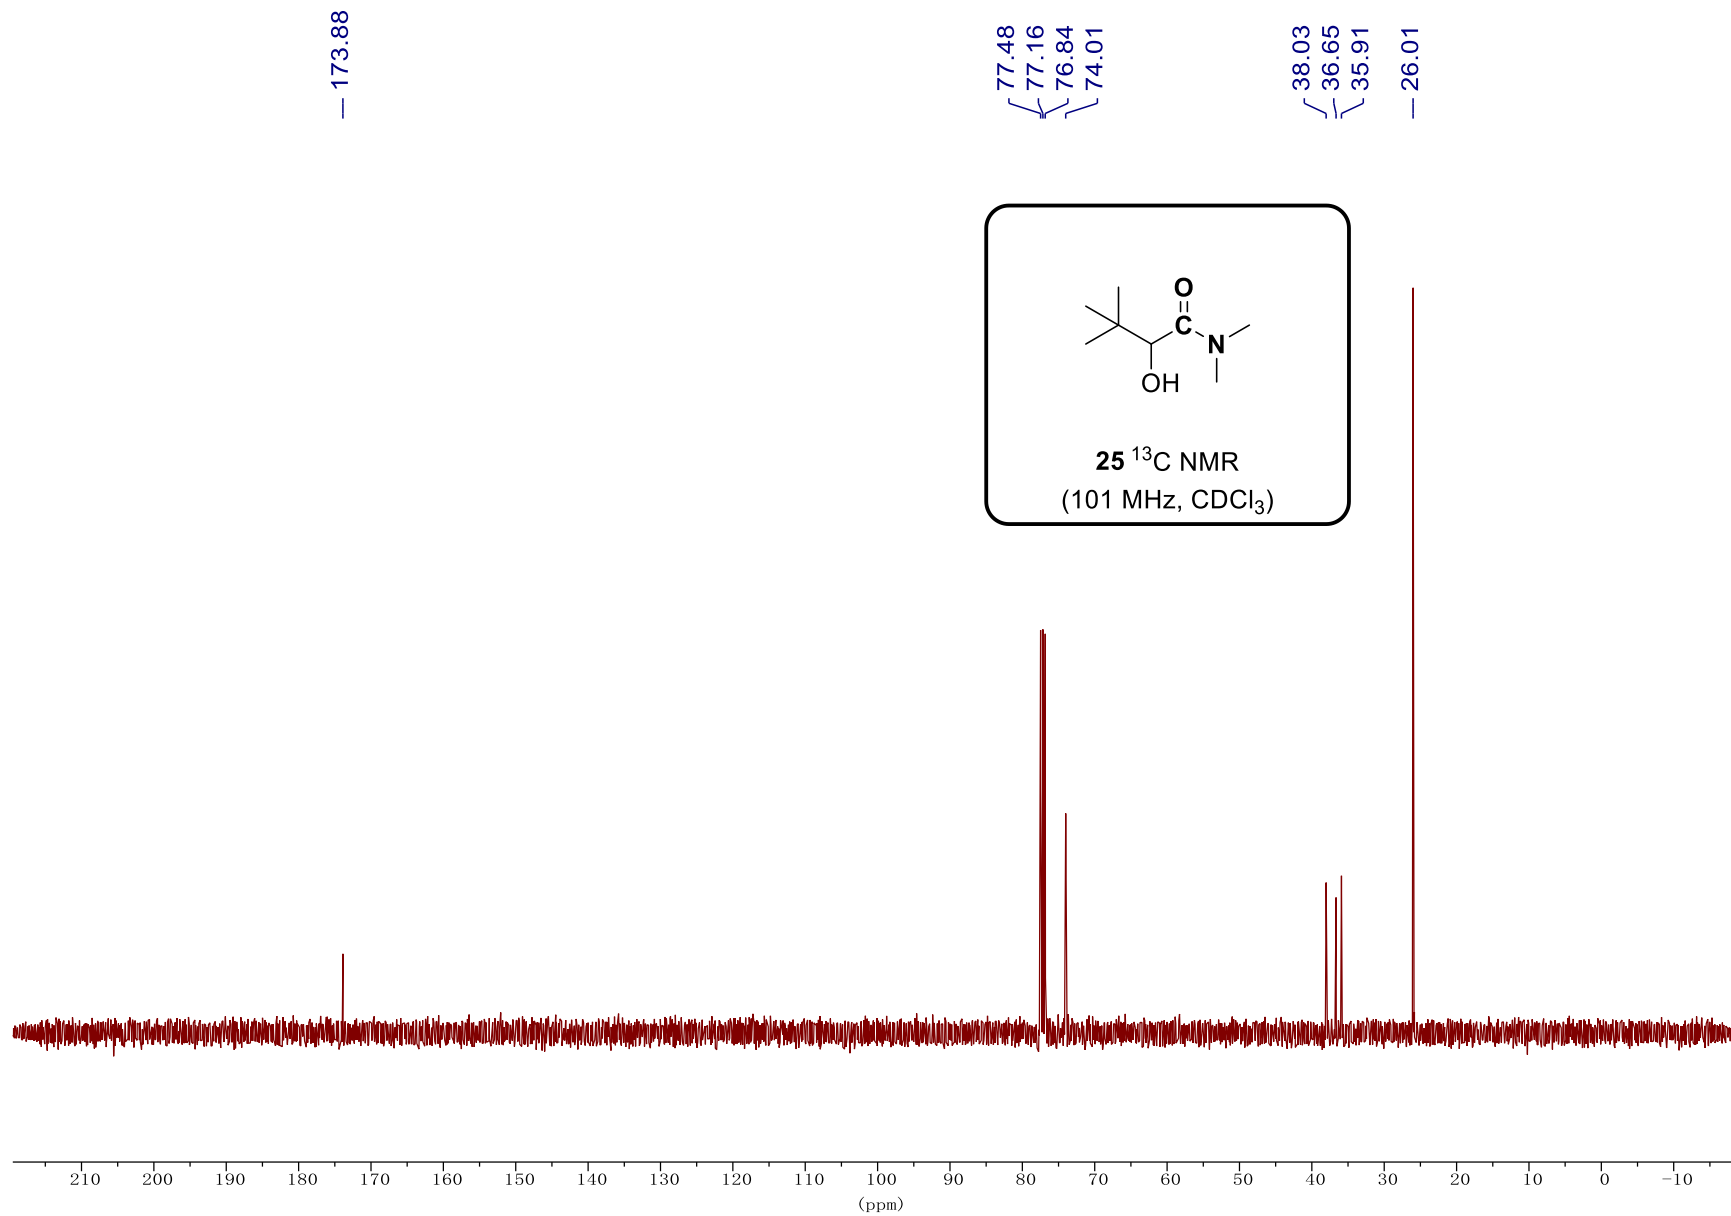

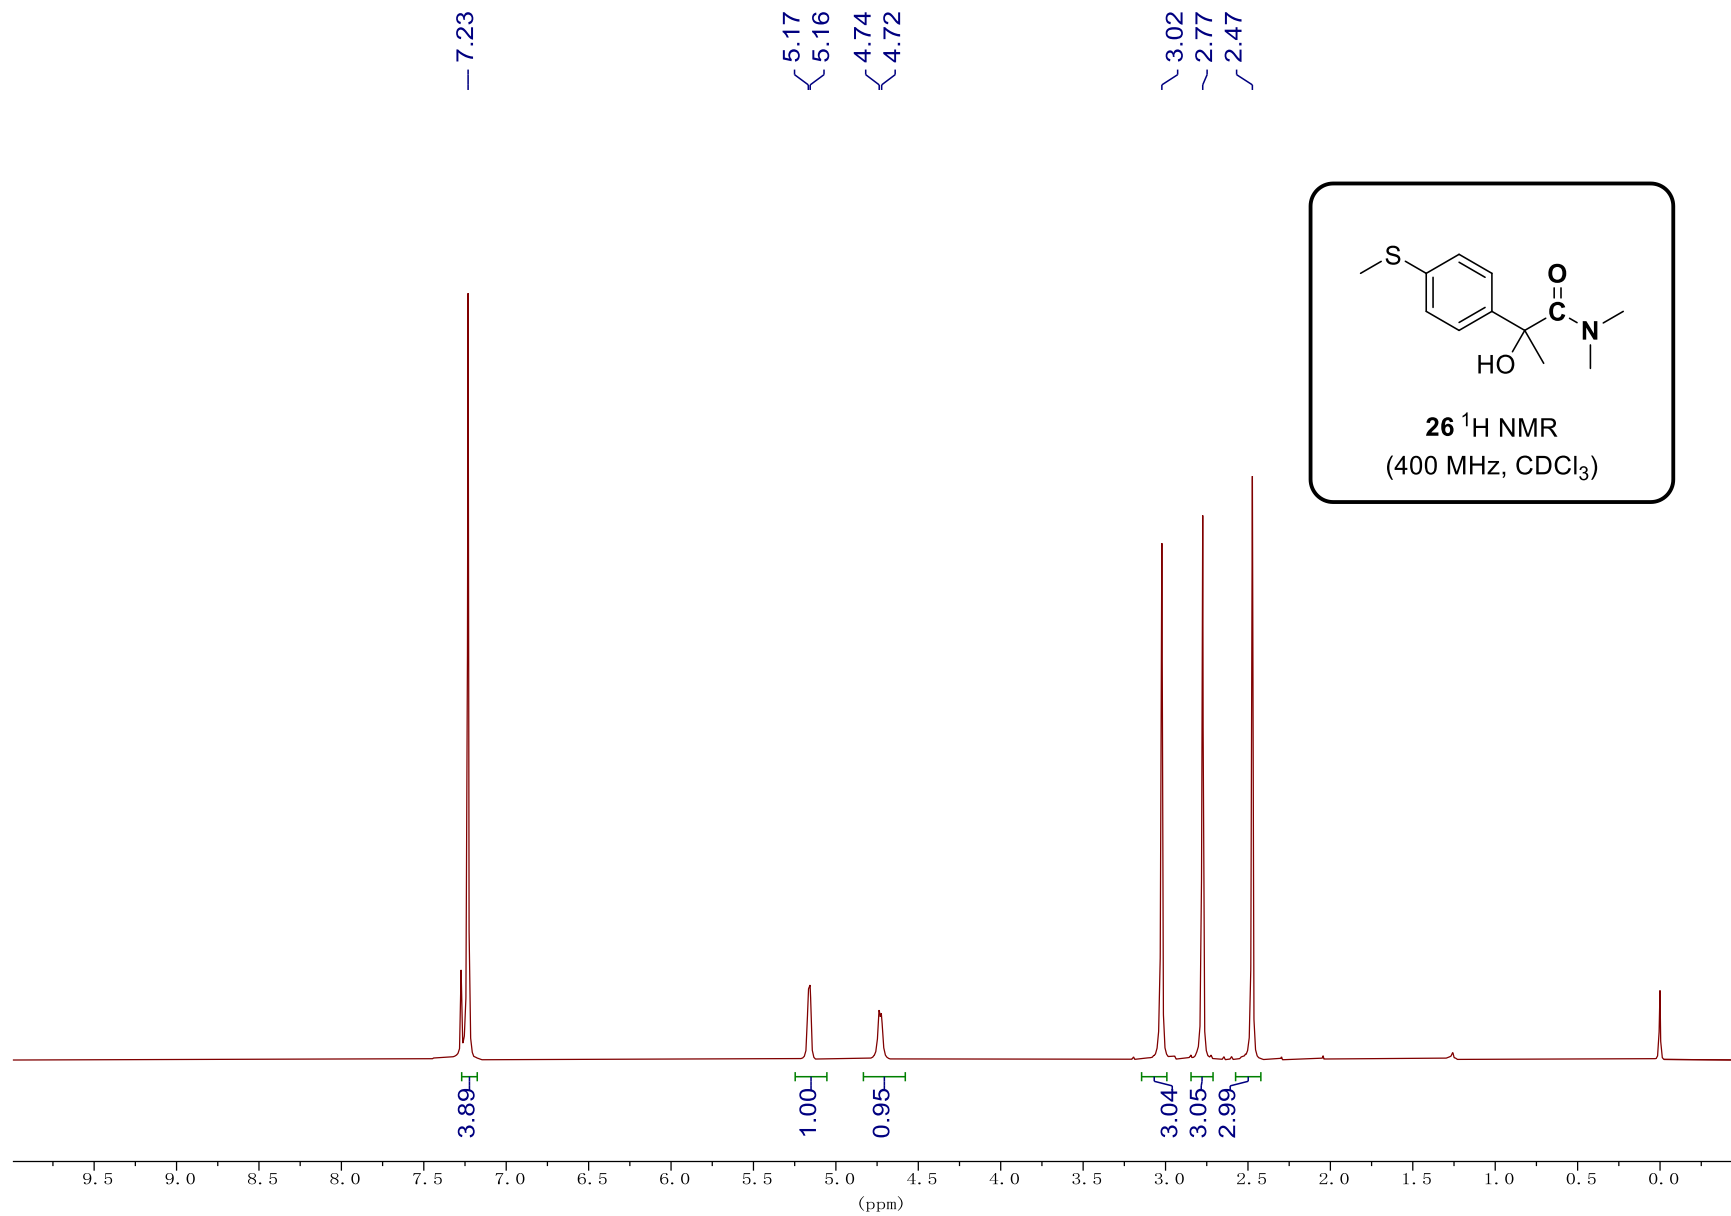

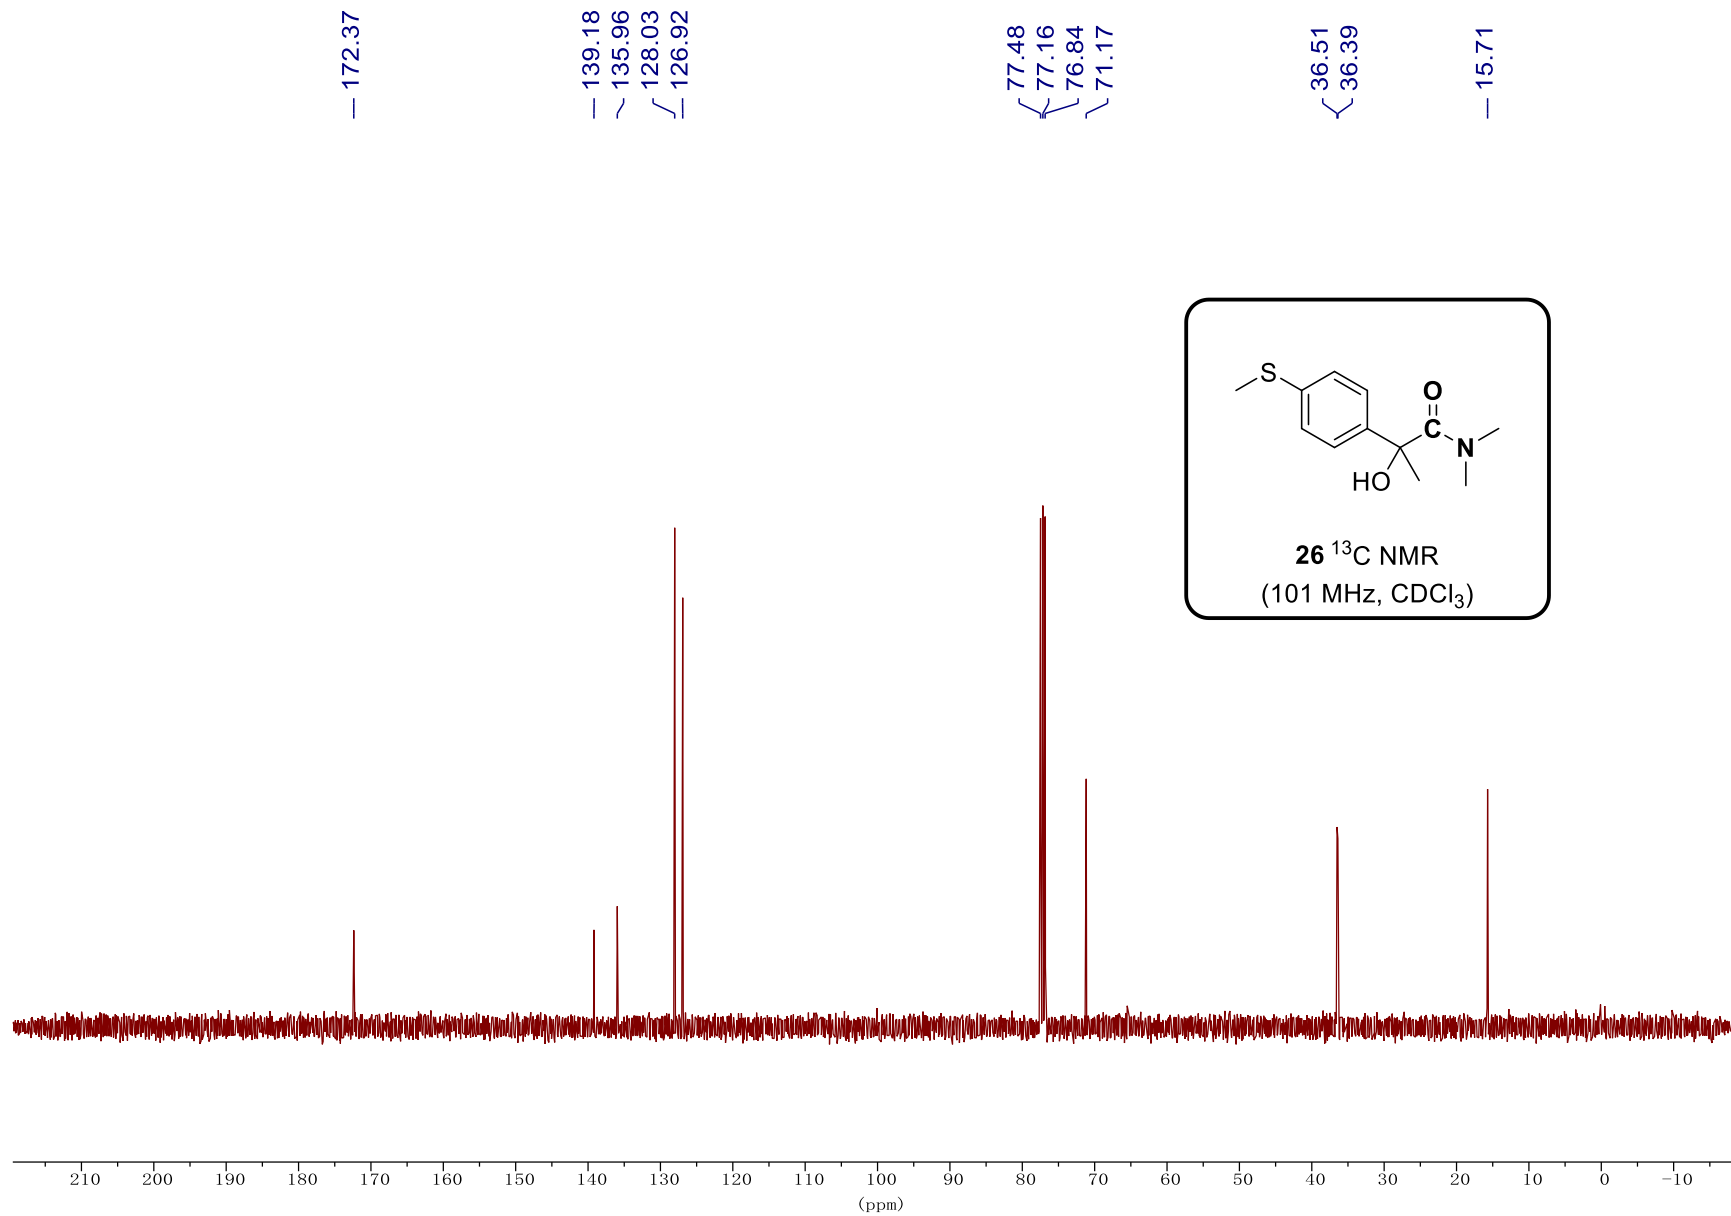

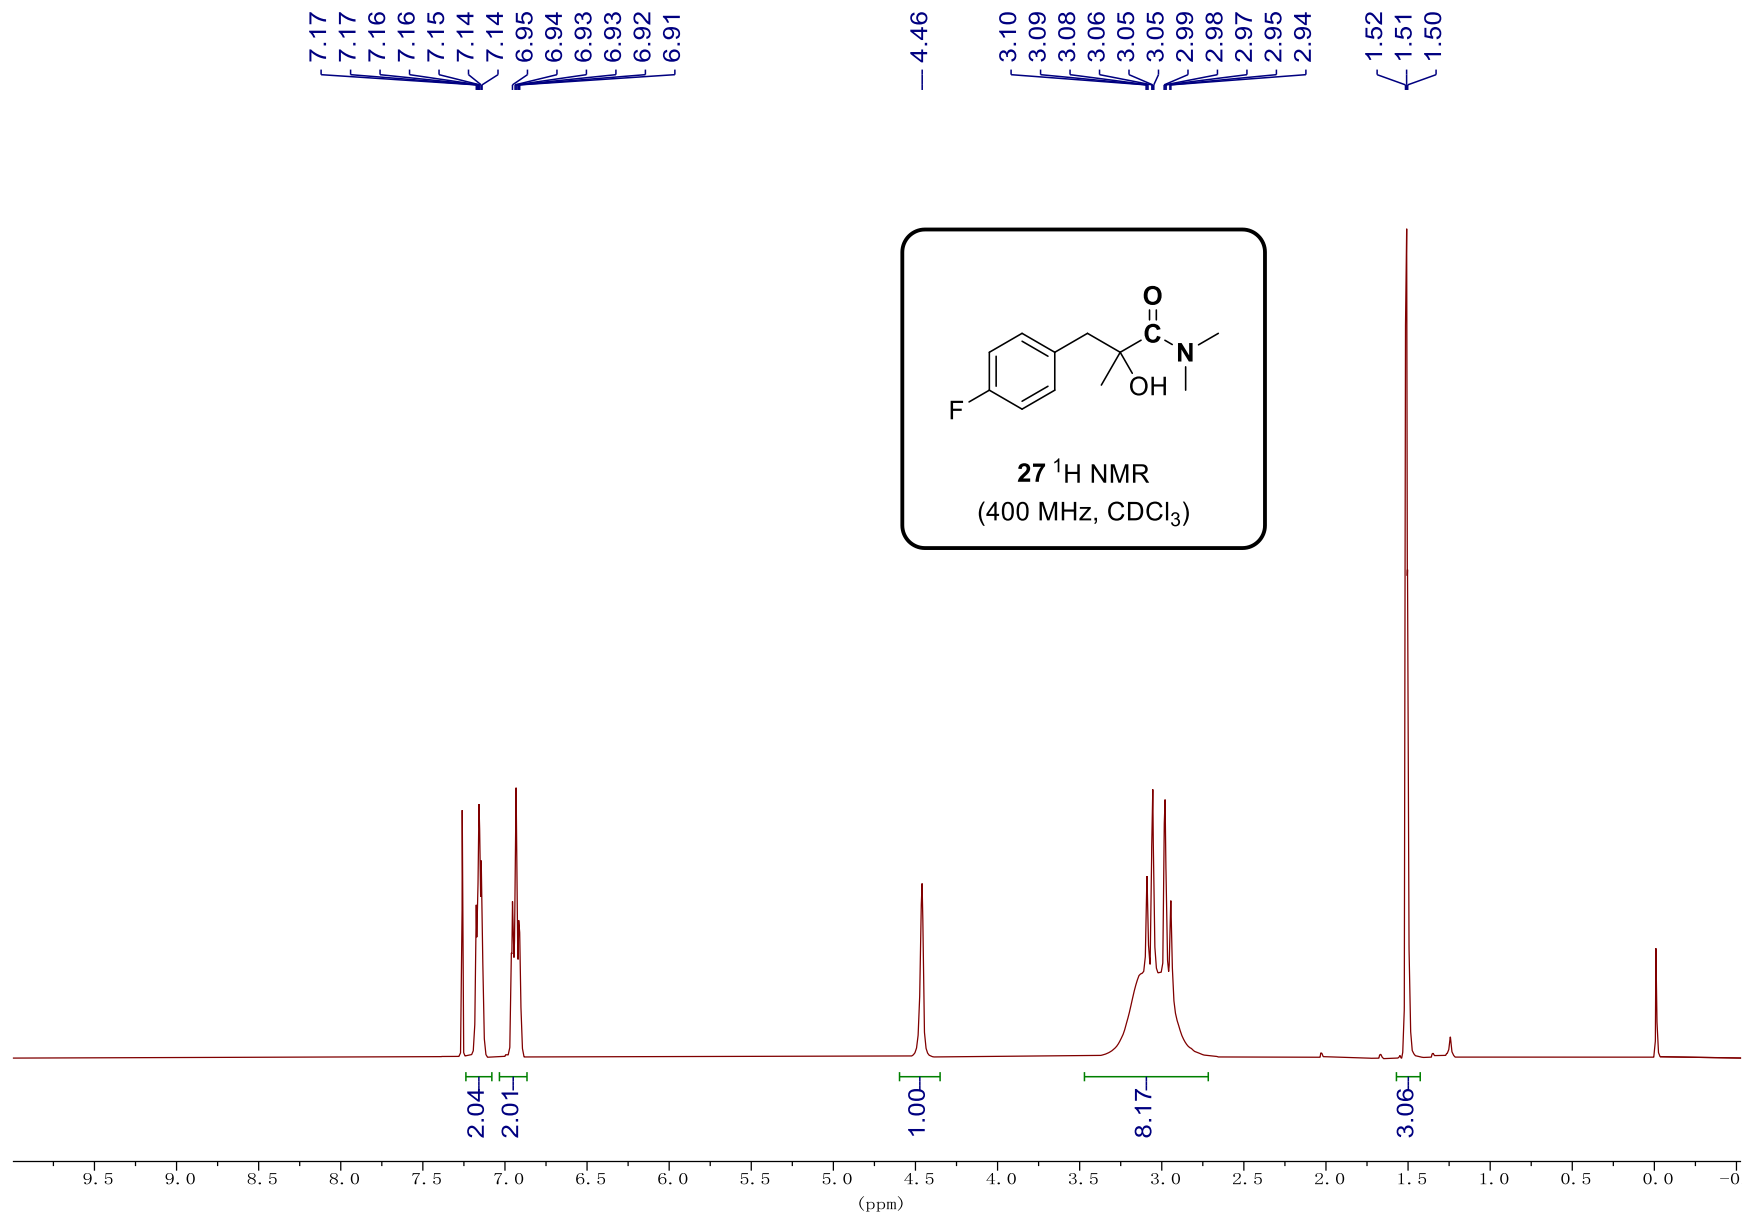

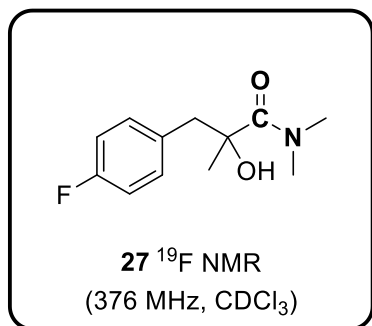

-116.34  
-116.36  
-116.37  
-116.38  
-116.40

-116.34  
-116.36  
-116.37  
-116.38  
-116.40

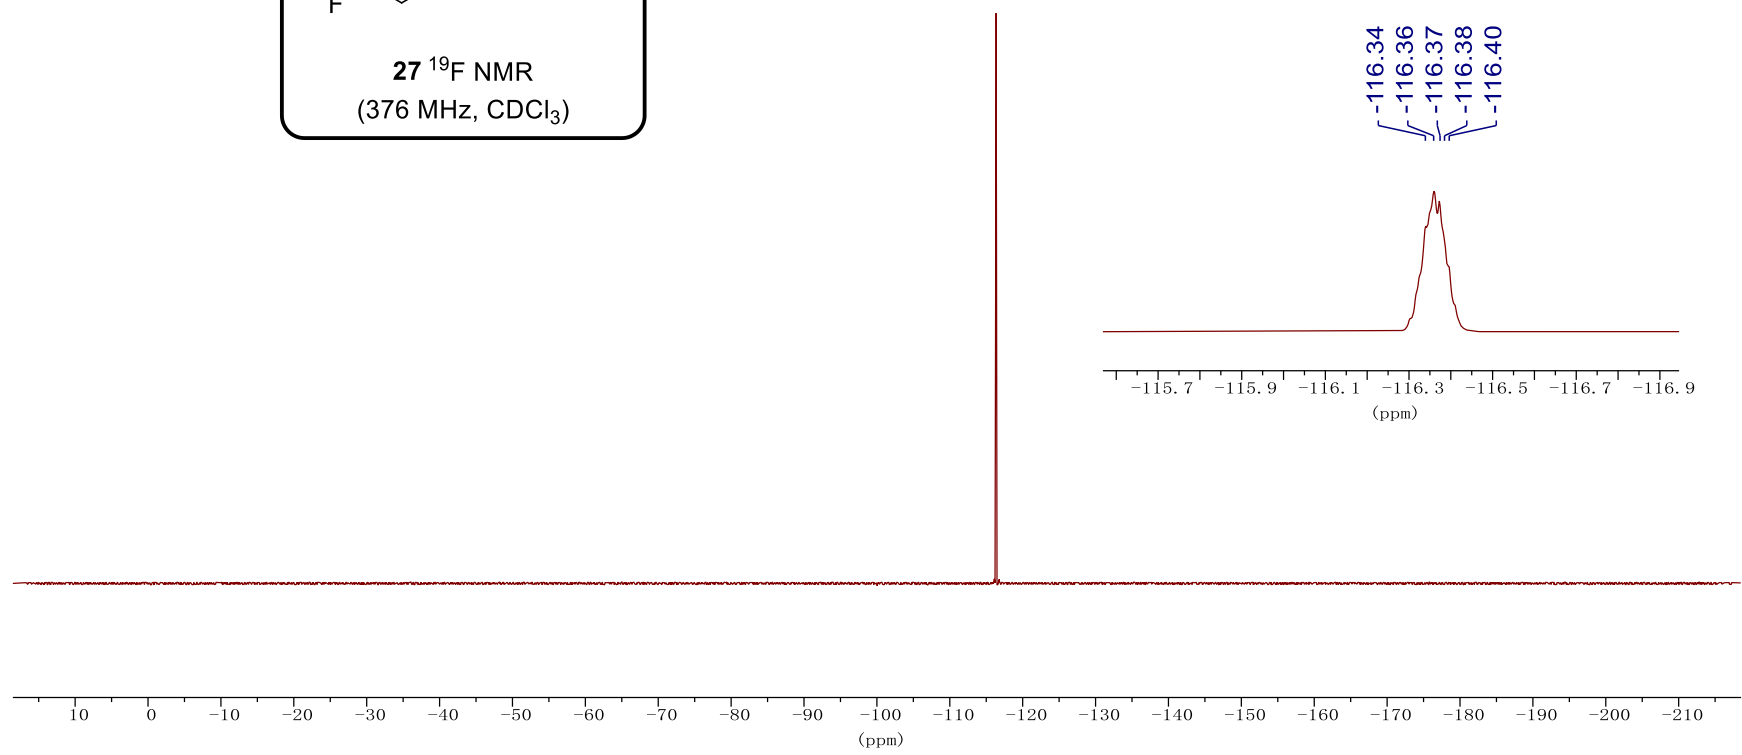

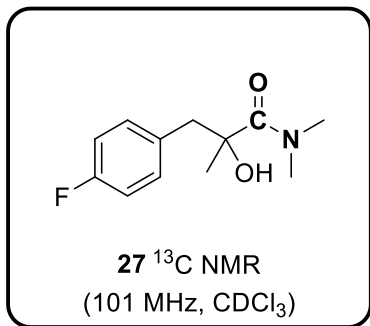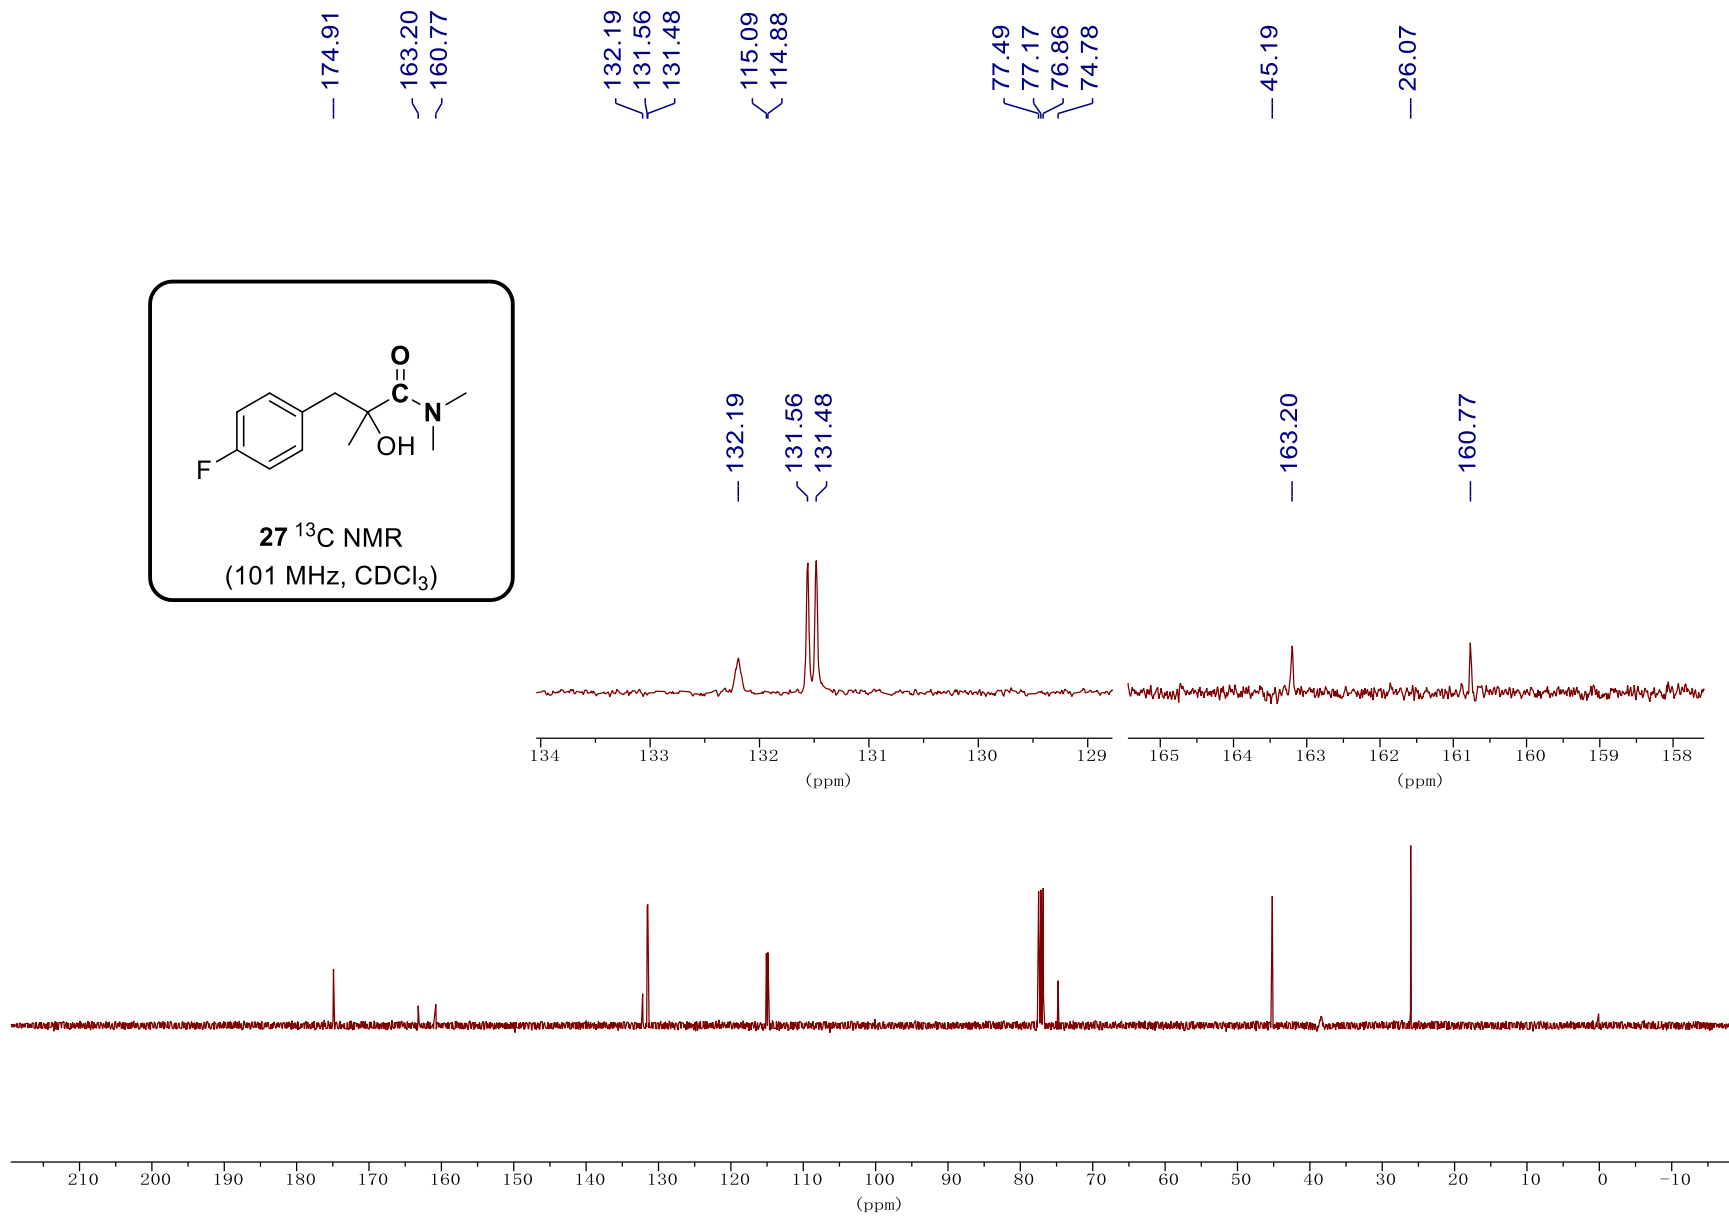



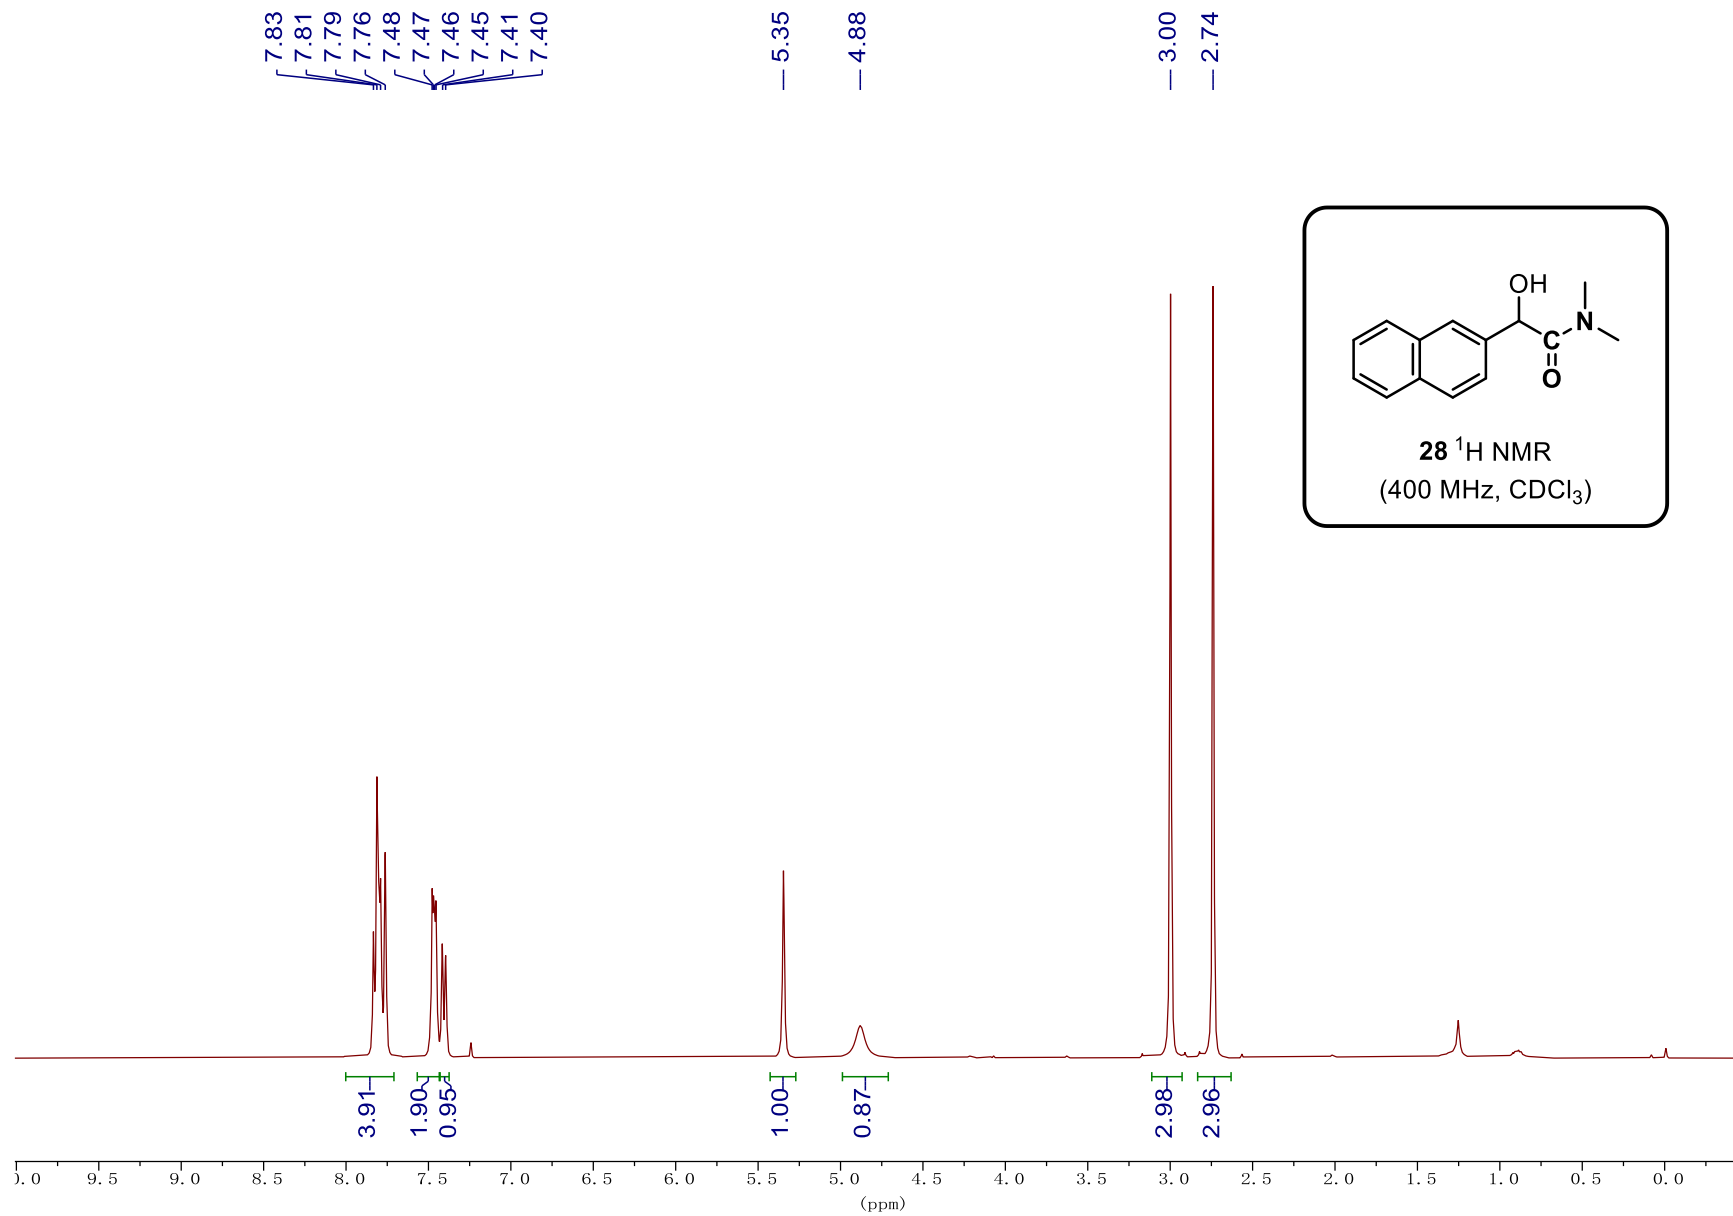

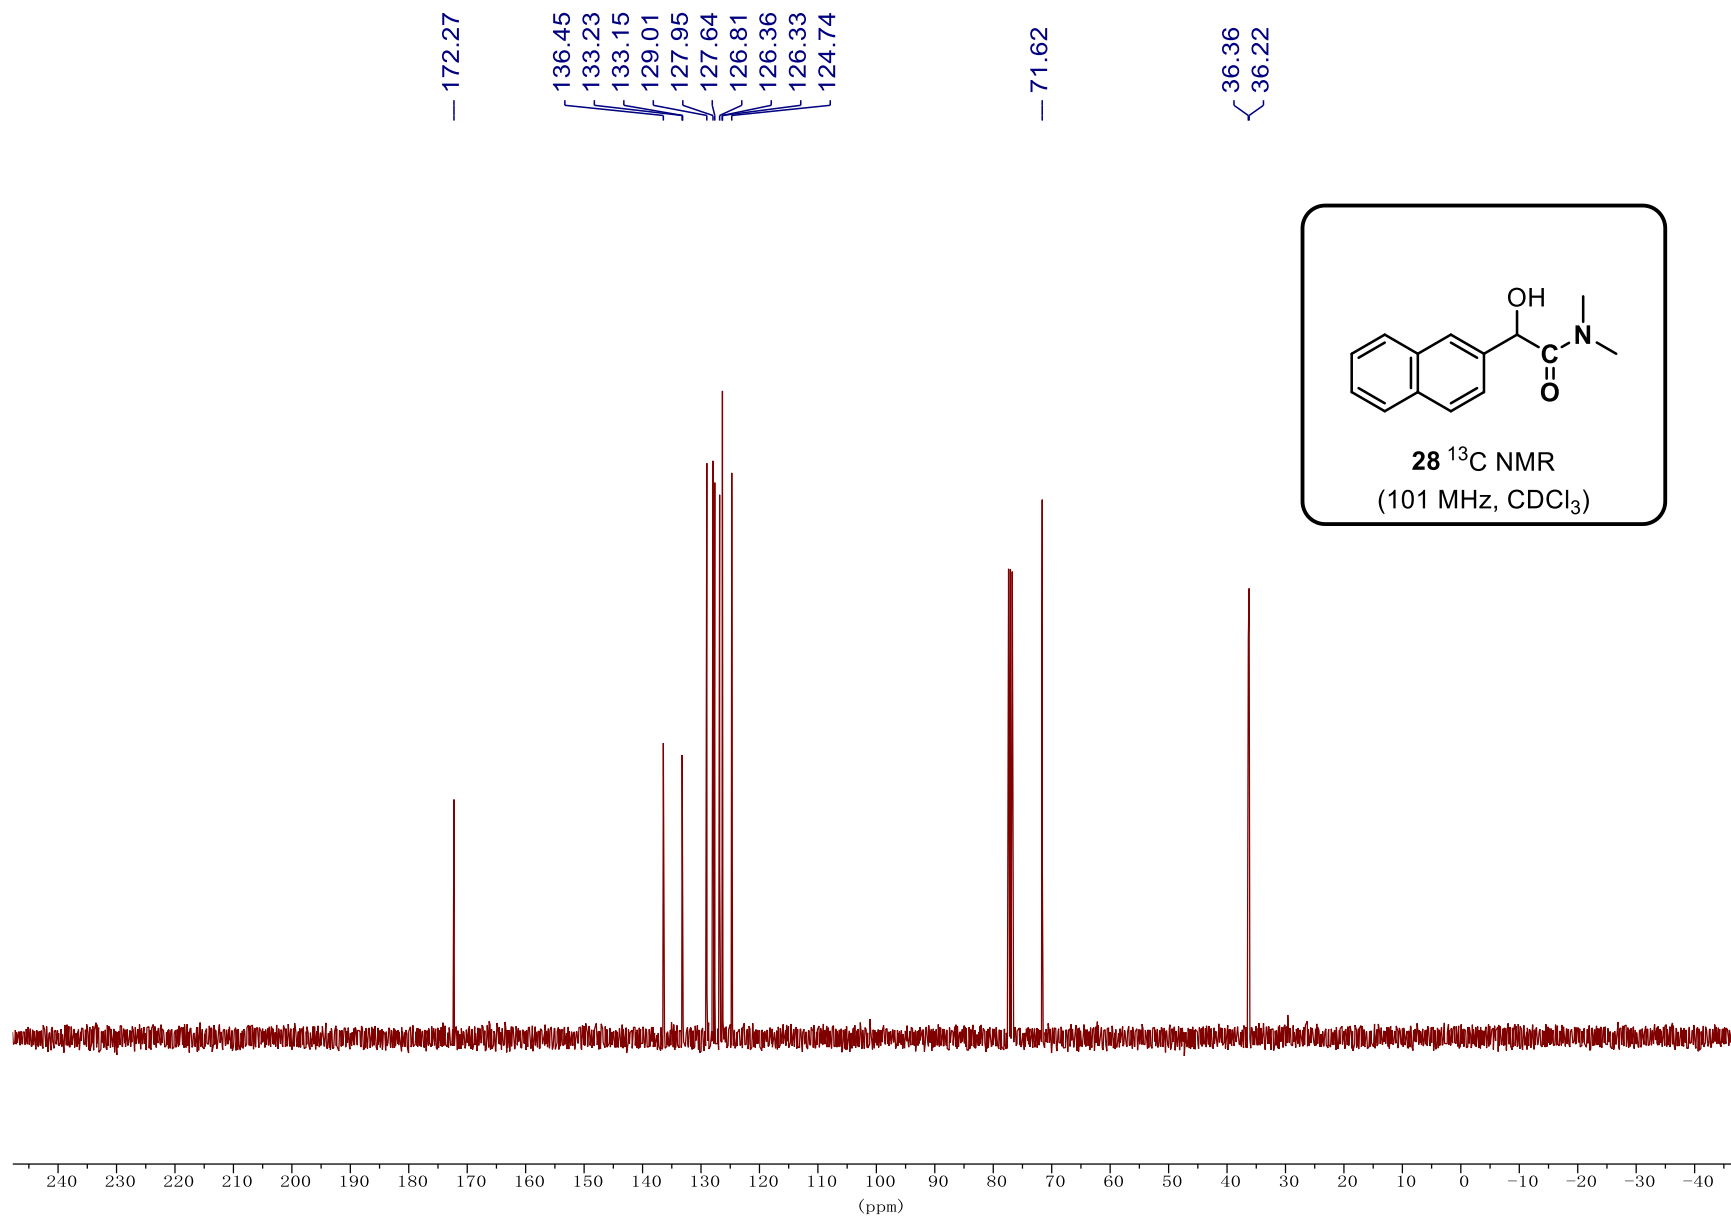

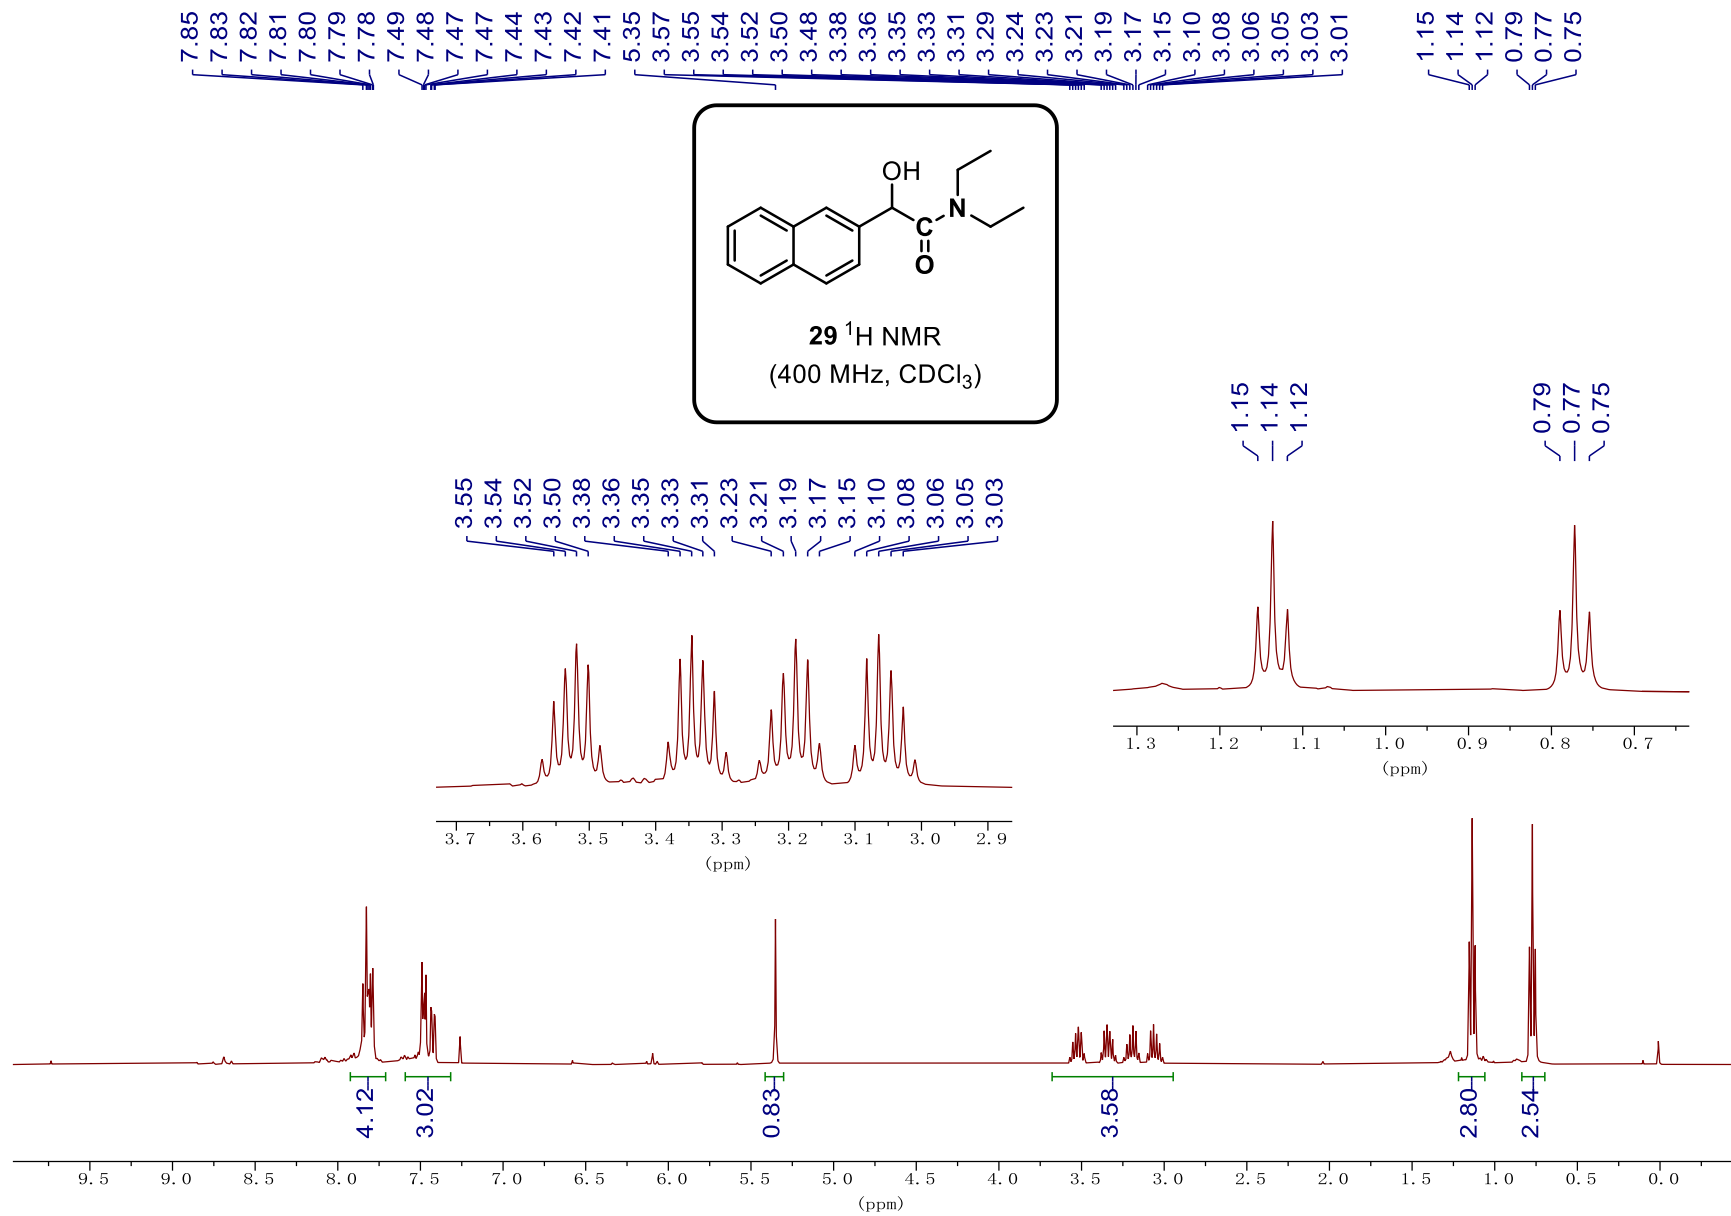

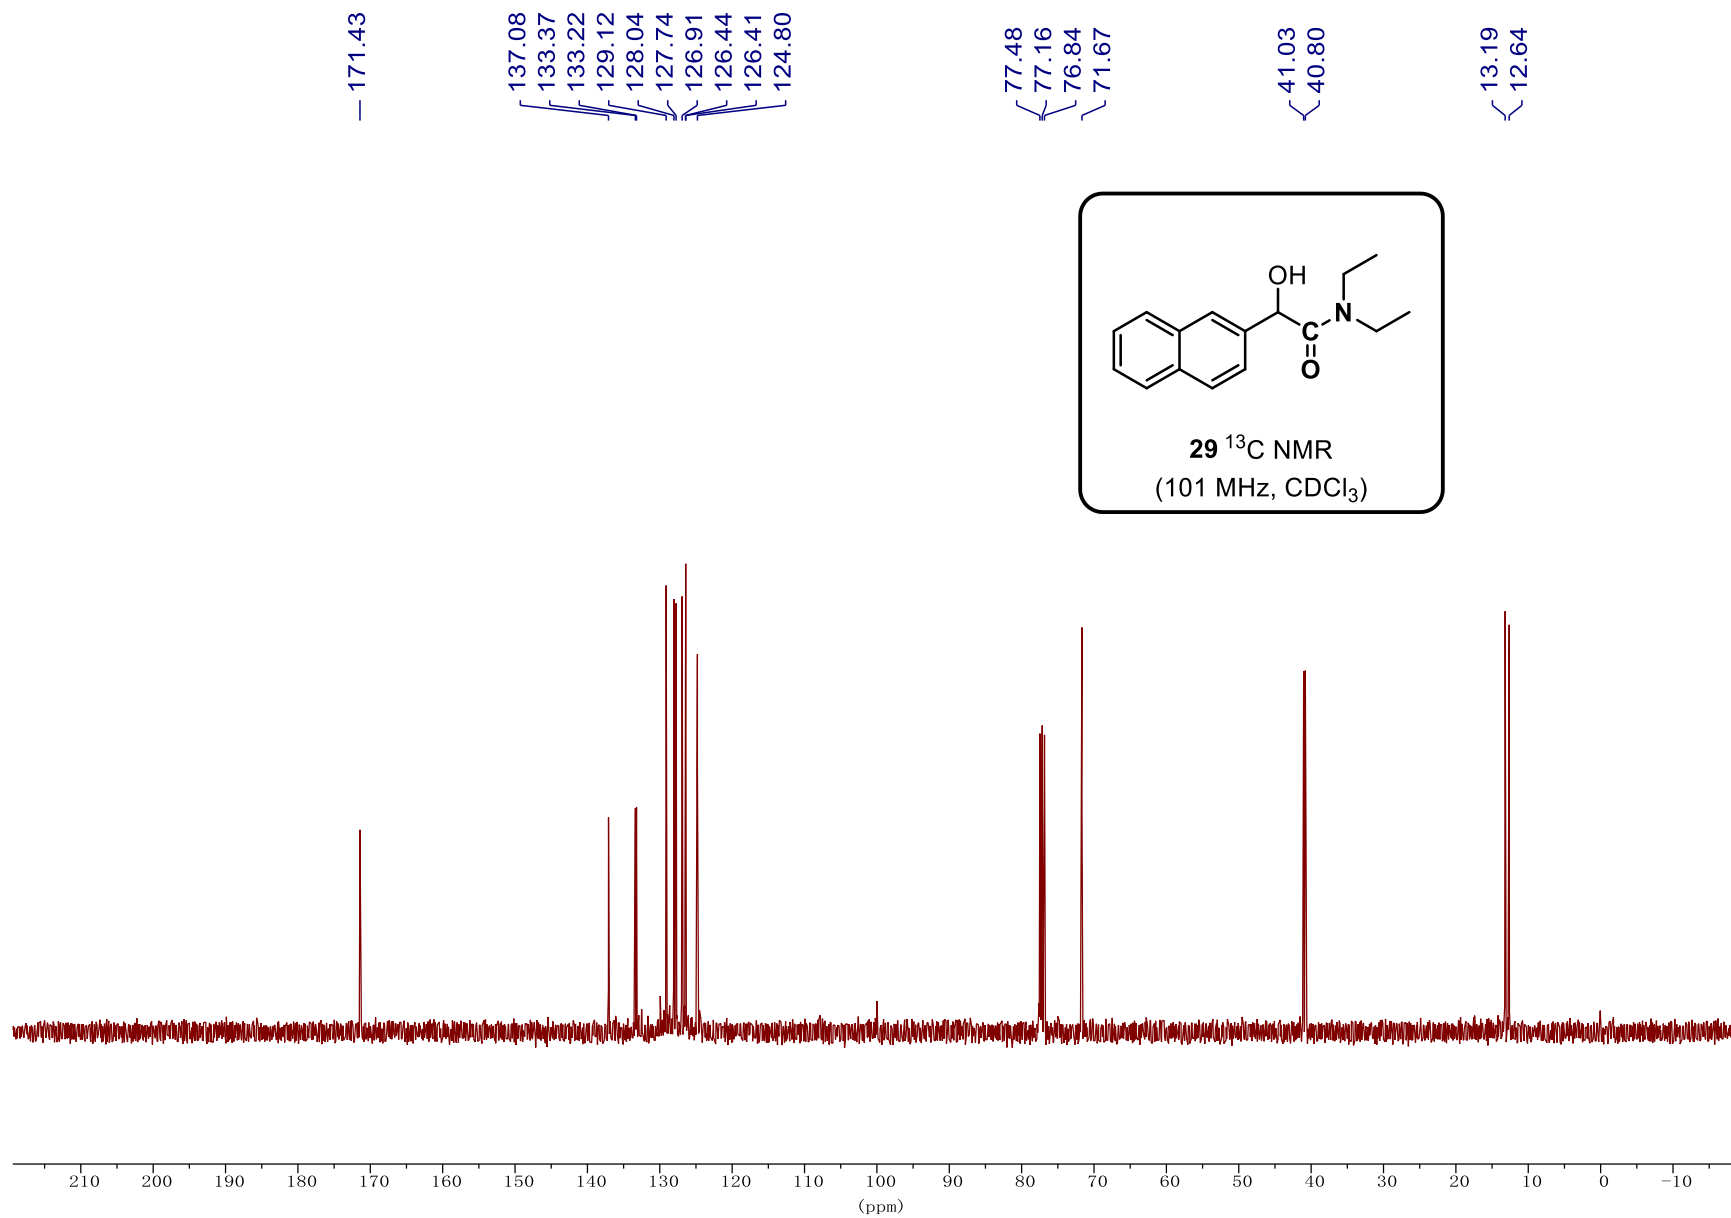

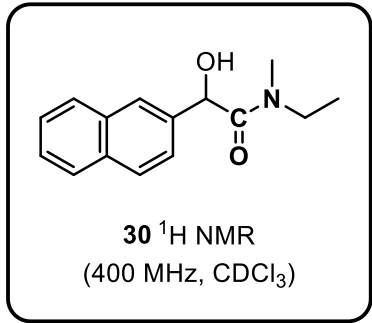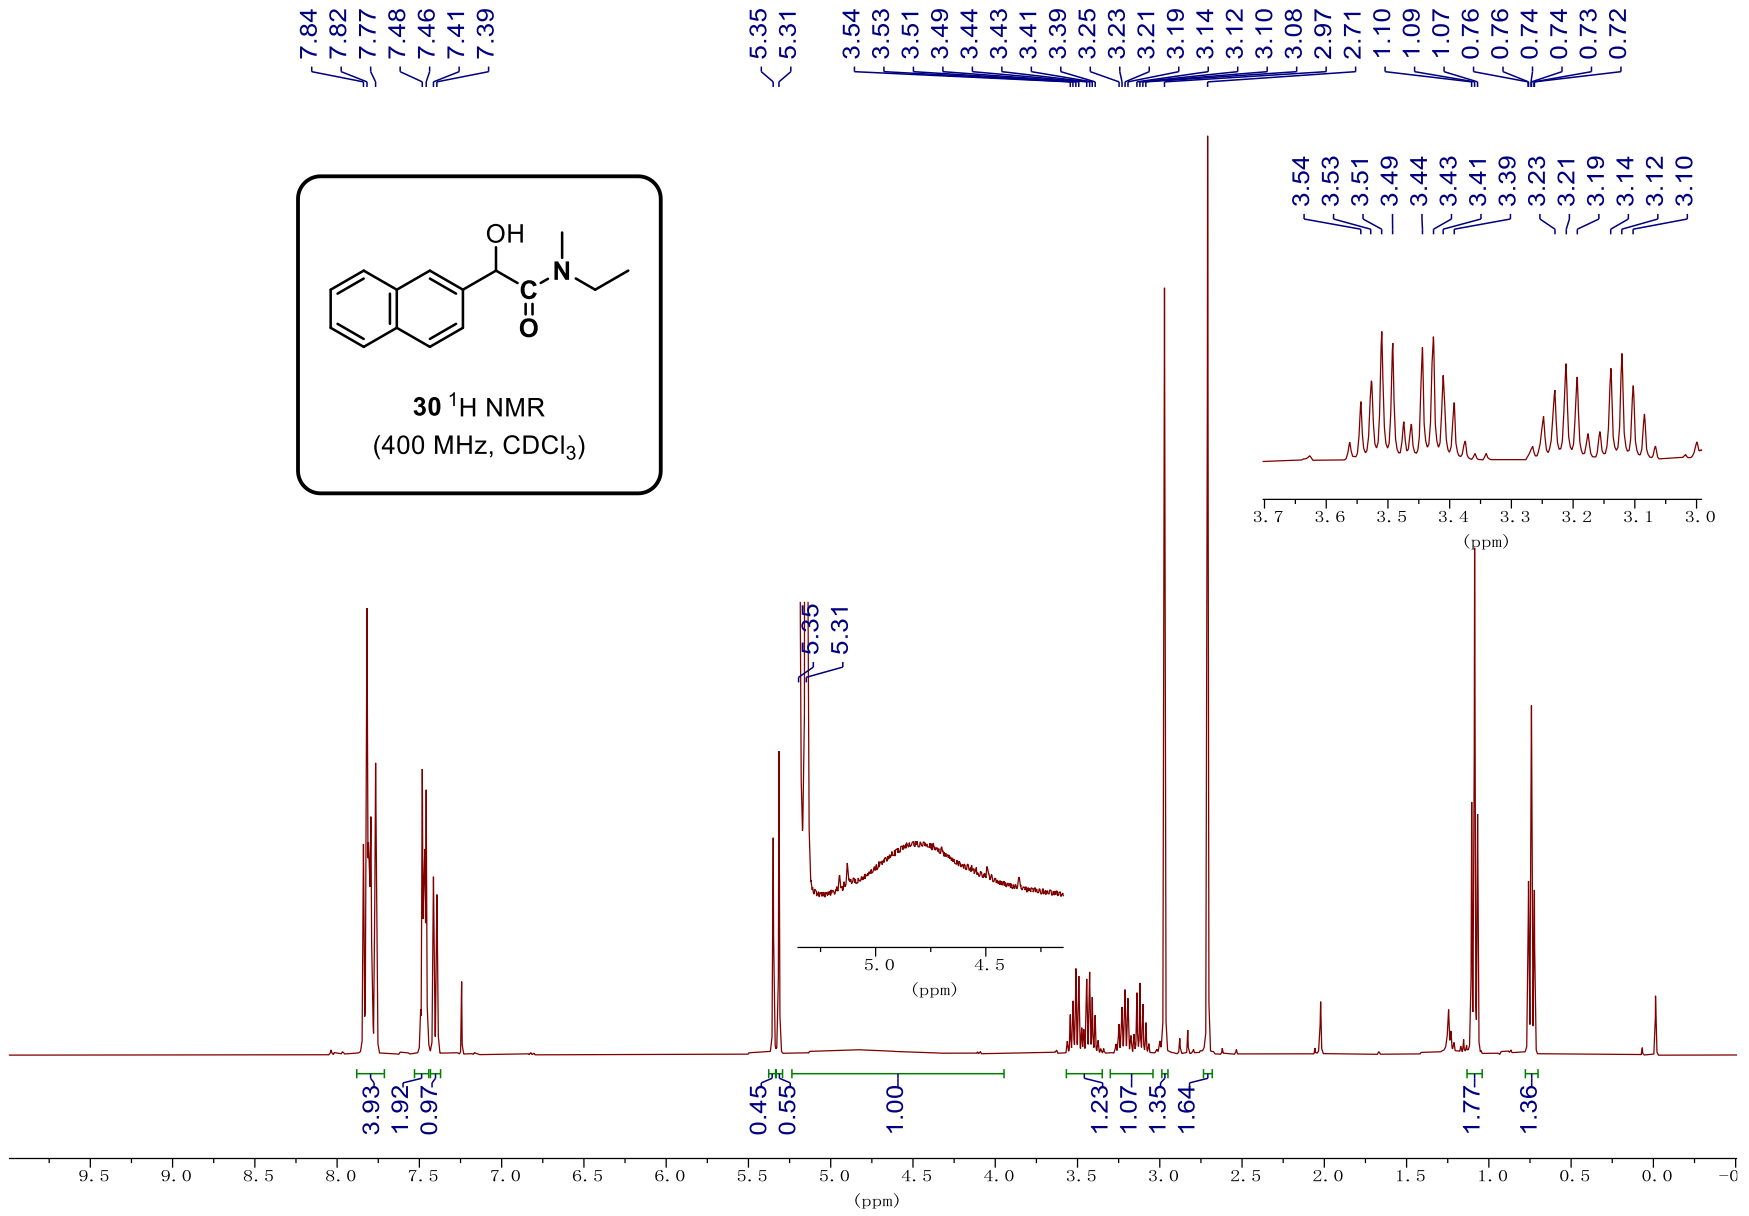

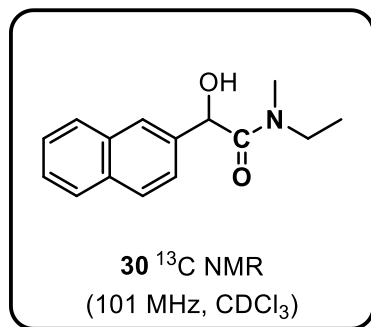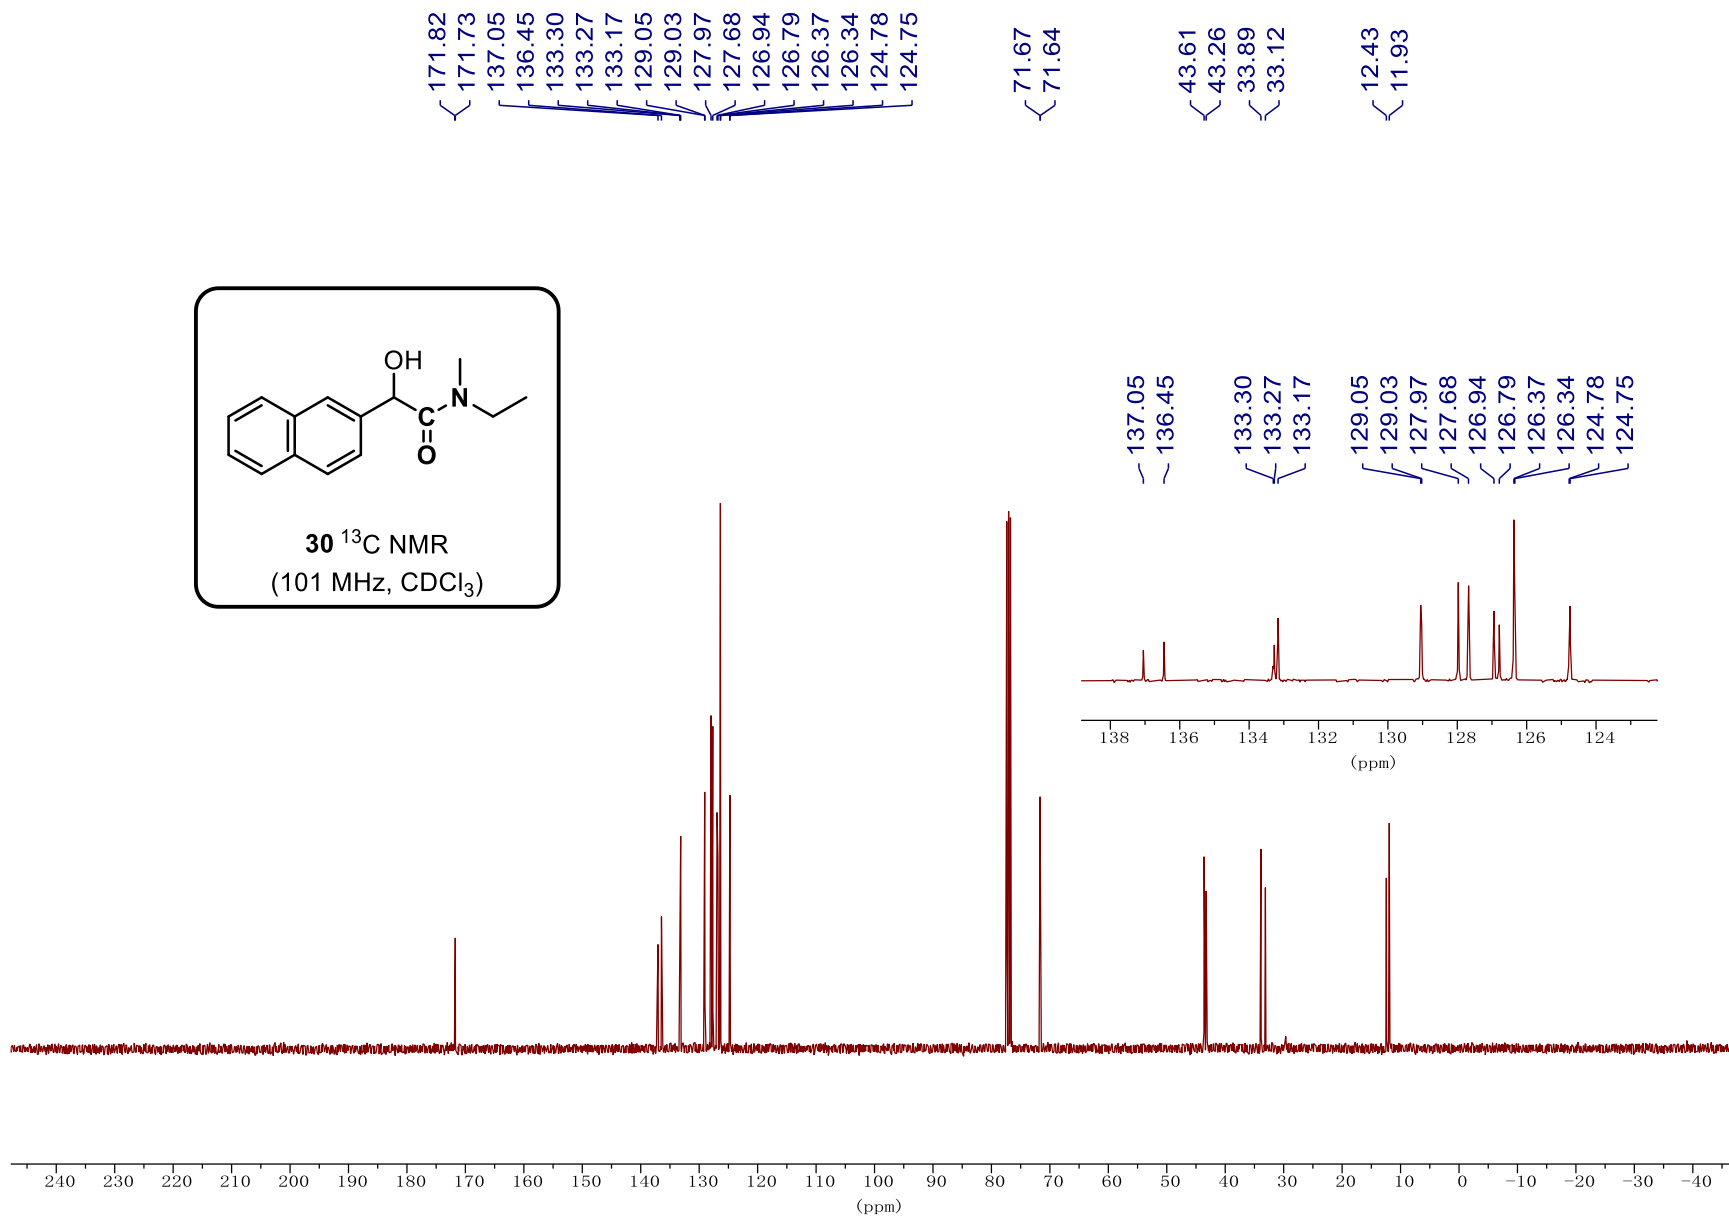

7.86  
7.84  
7.81  
7.77  
7.50  
7.49  
7.48  
7.47  
7.45  
7.28  
7.26  
7.24  
7.20  
7.18  
7.17  
6.92  
6.91  
5.43  
5.41  
4.75  
4.71  
4.60  
4.57  
4.54  
4.51  
4.37  
4.13  
4.09  
2.97  
2.82  
2.77  
2.69

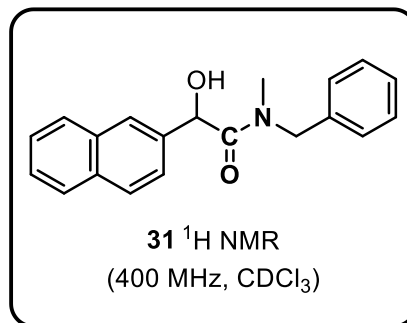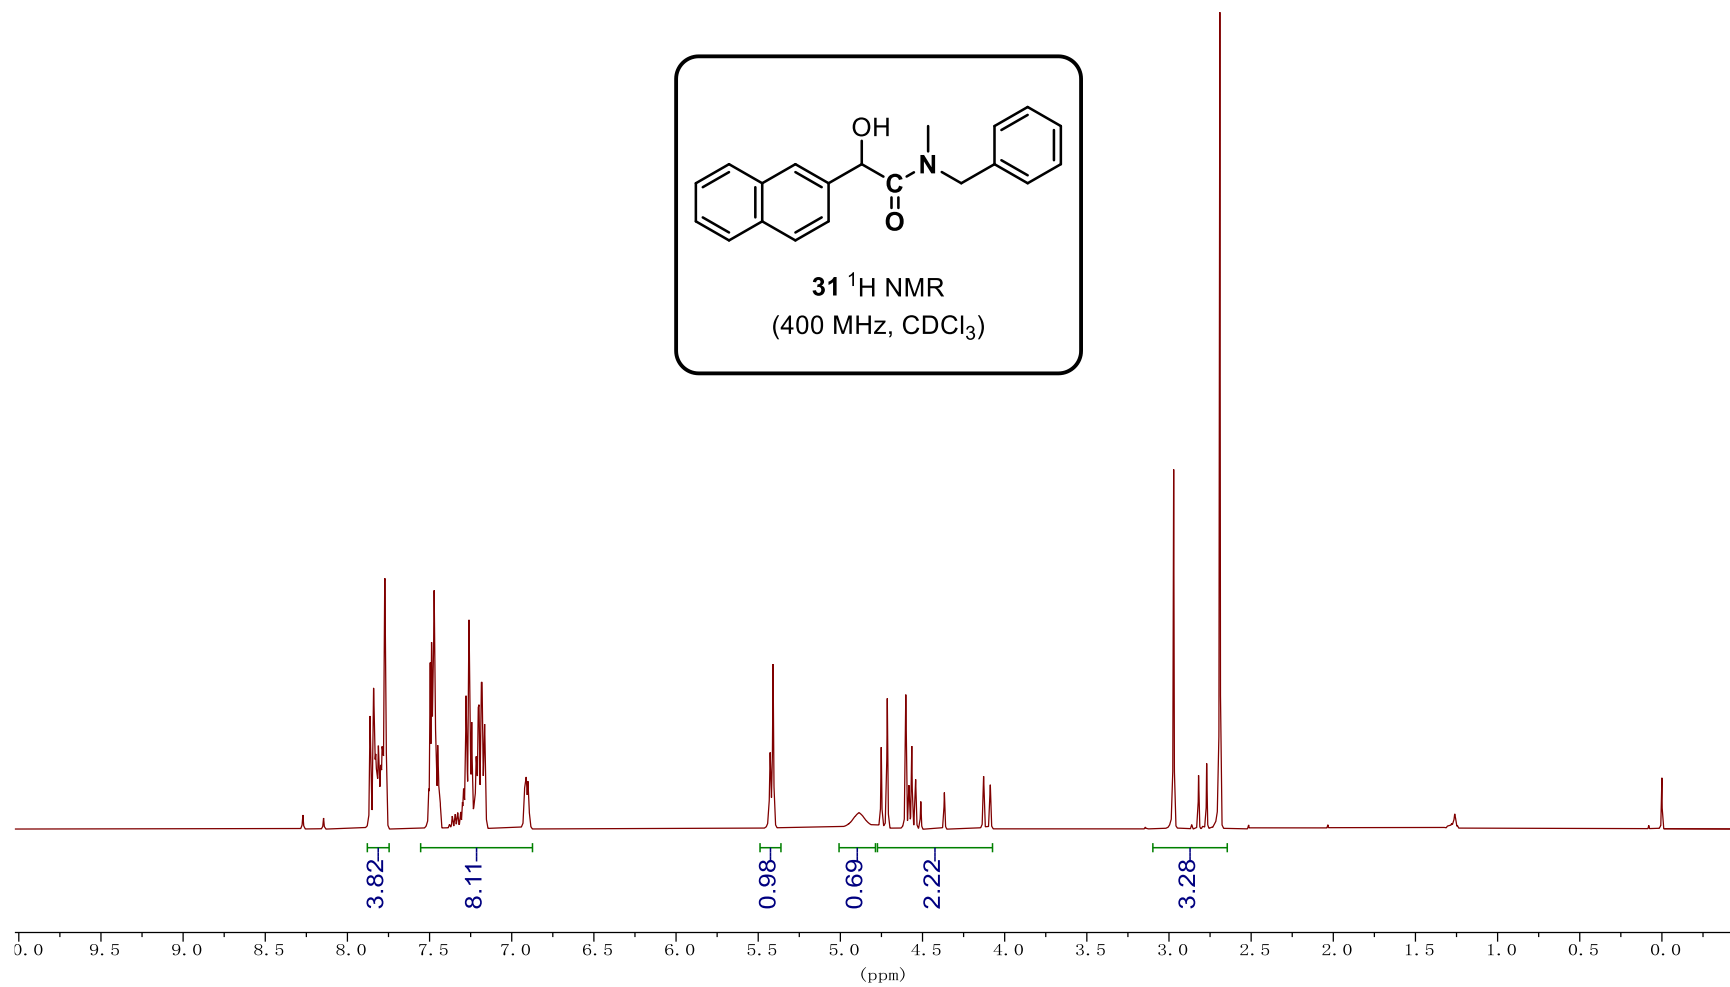

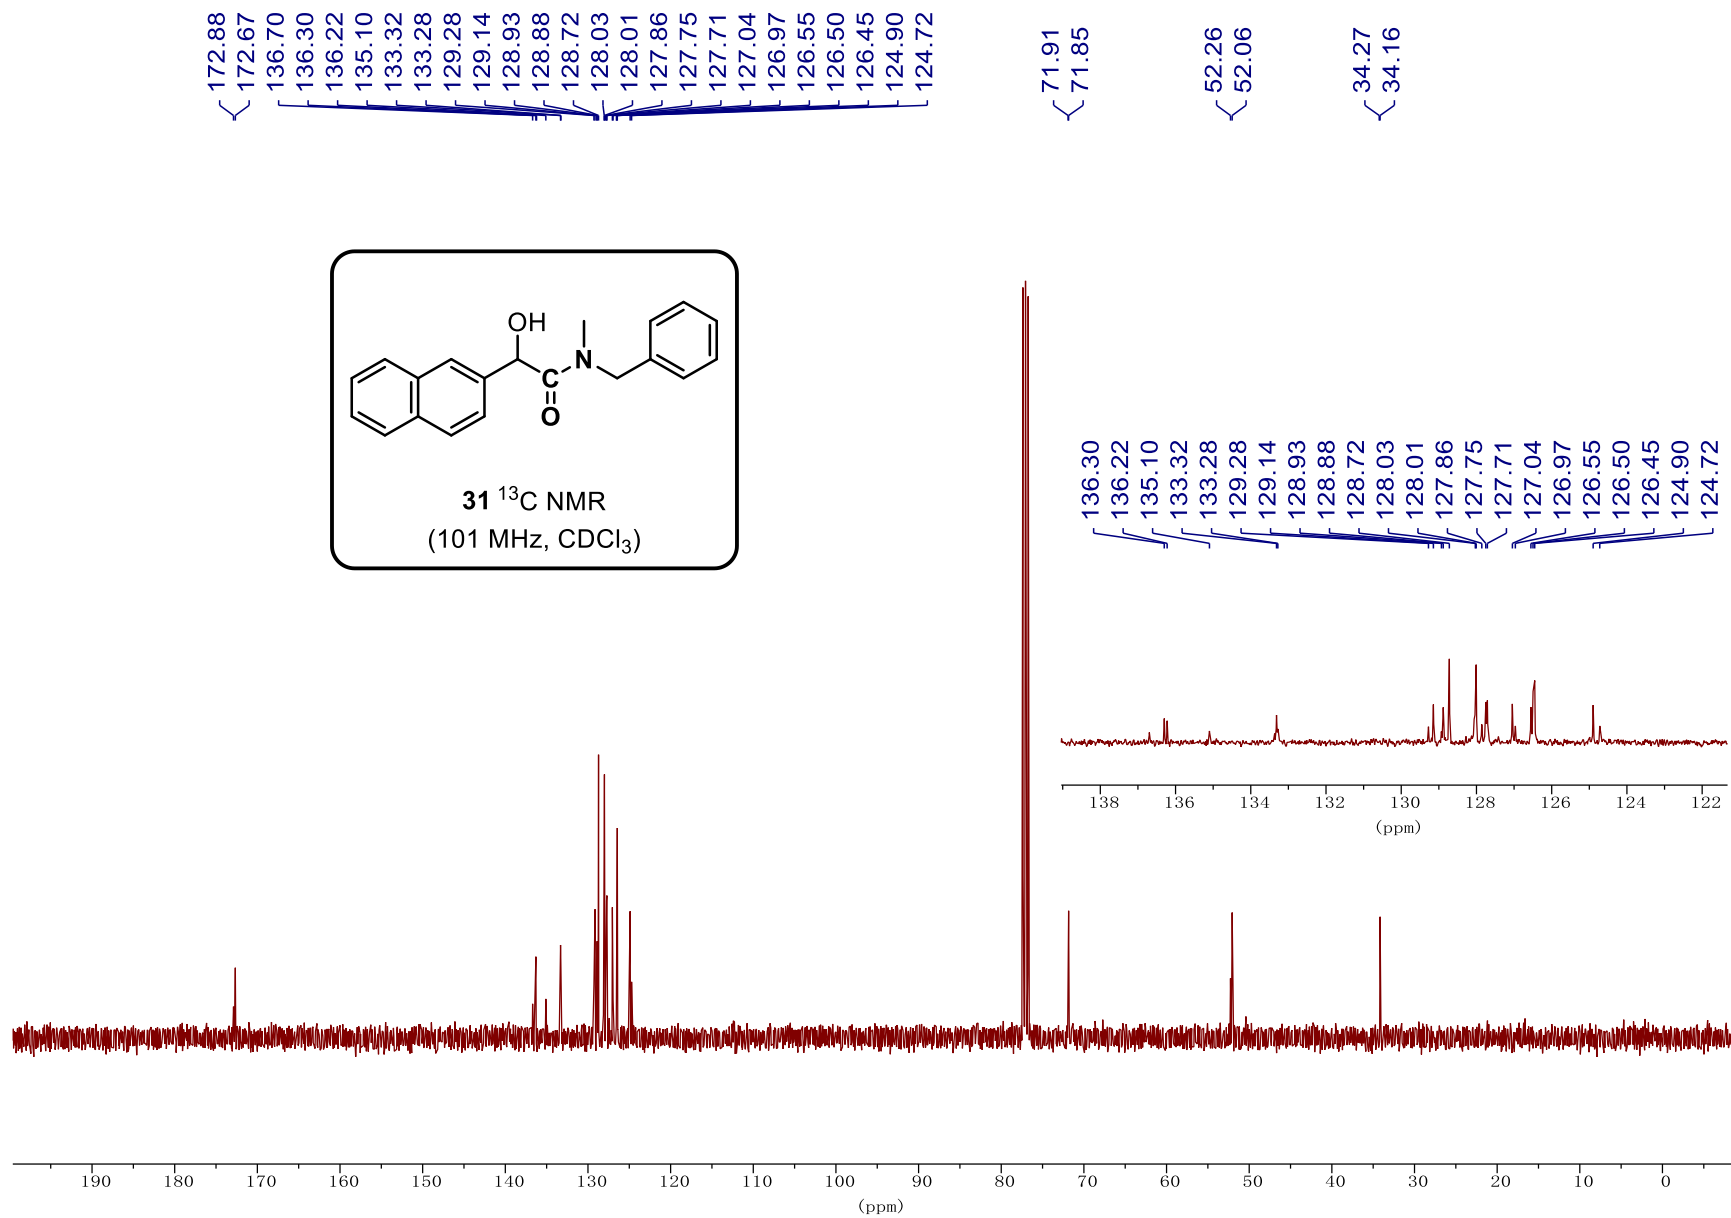



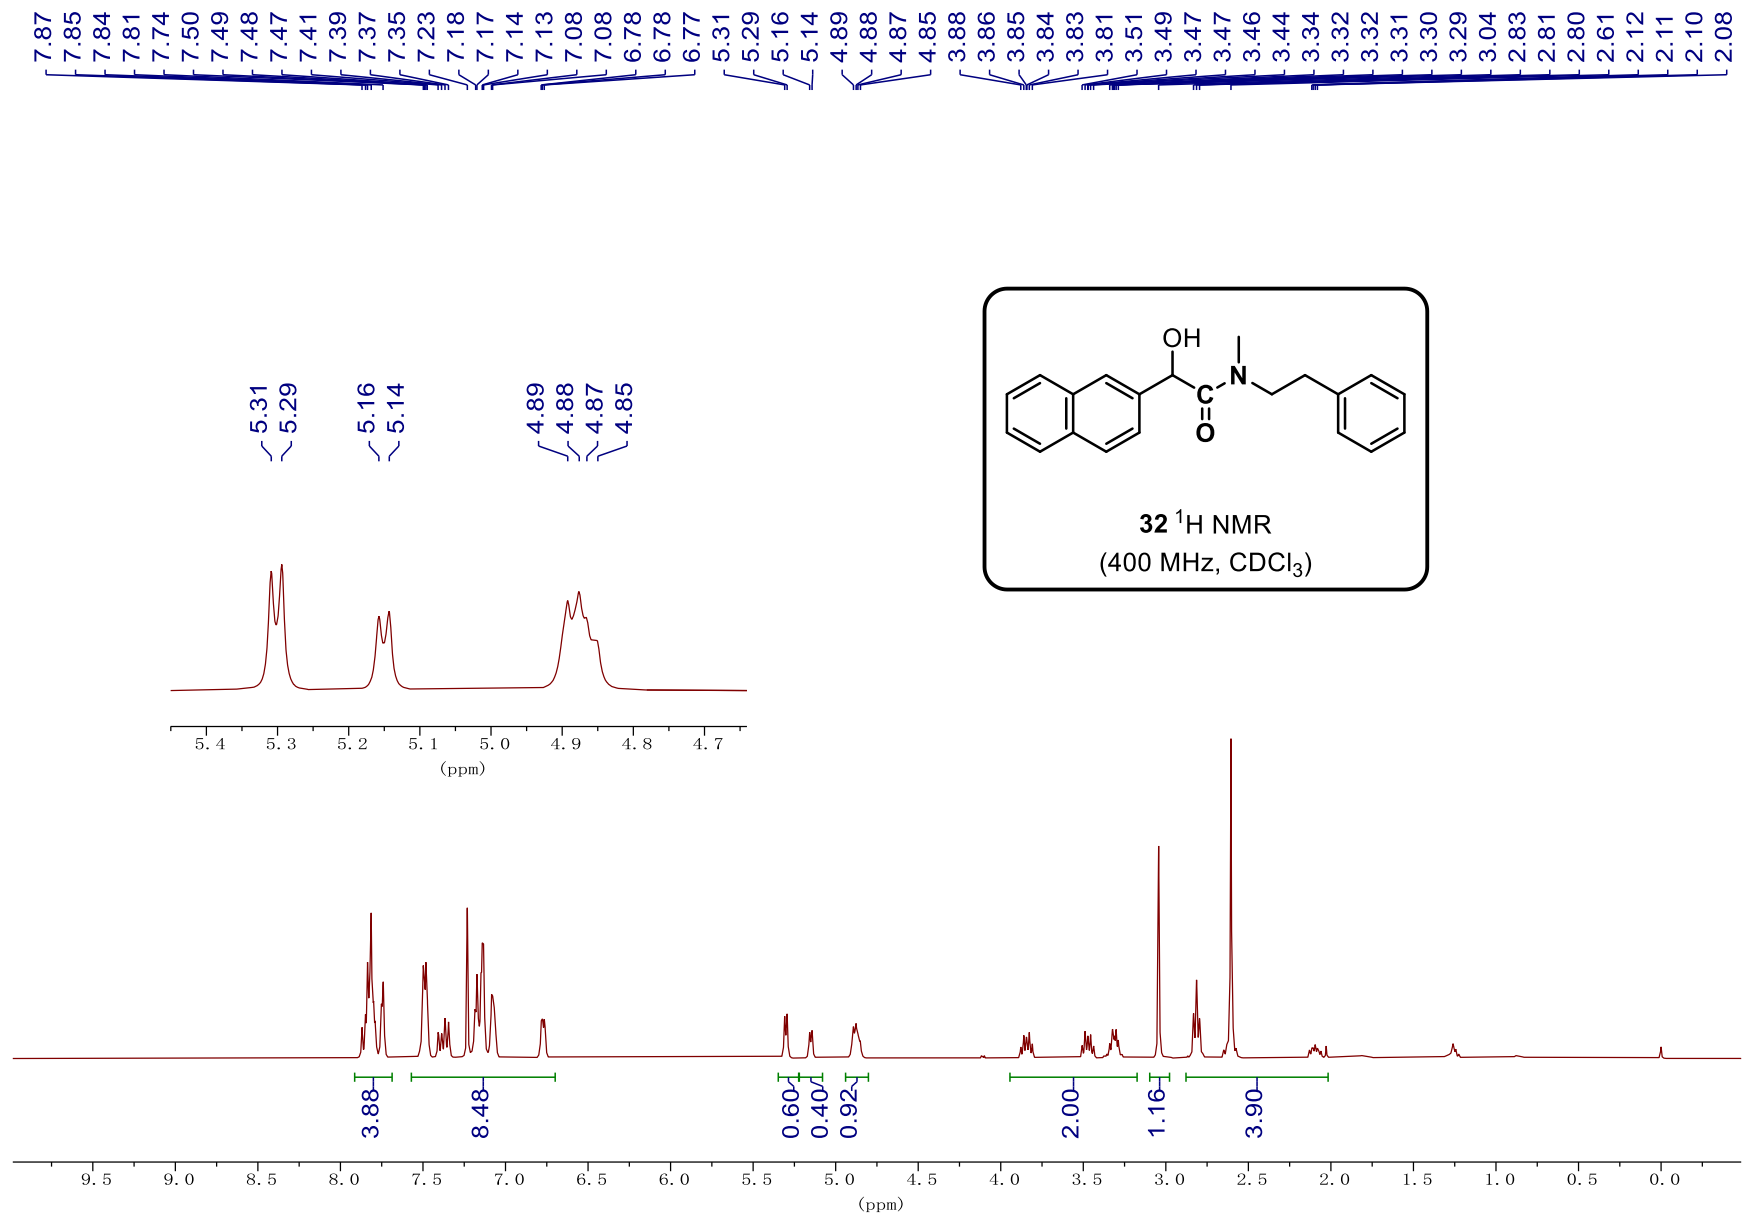

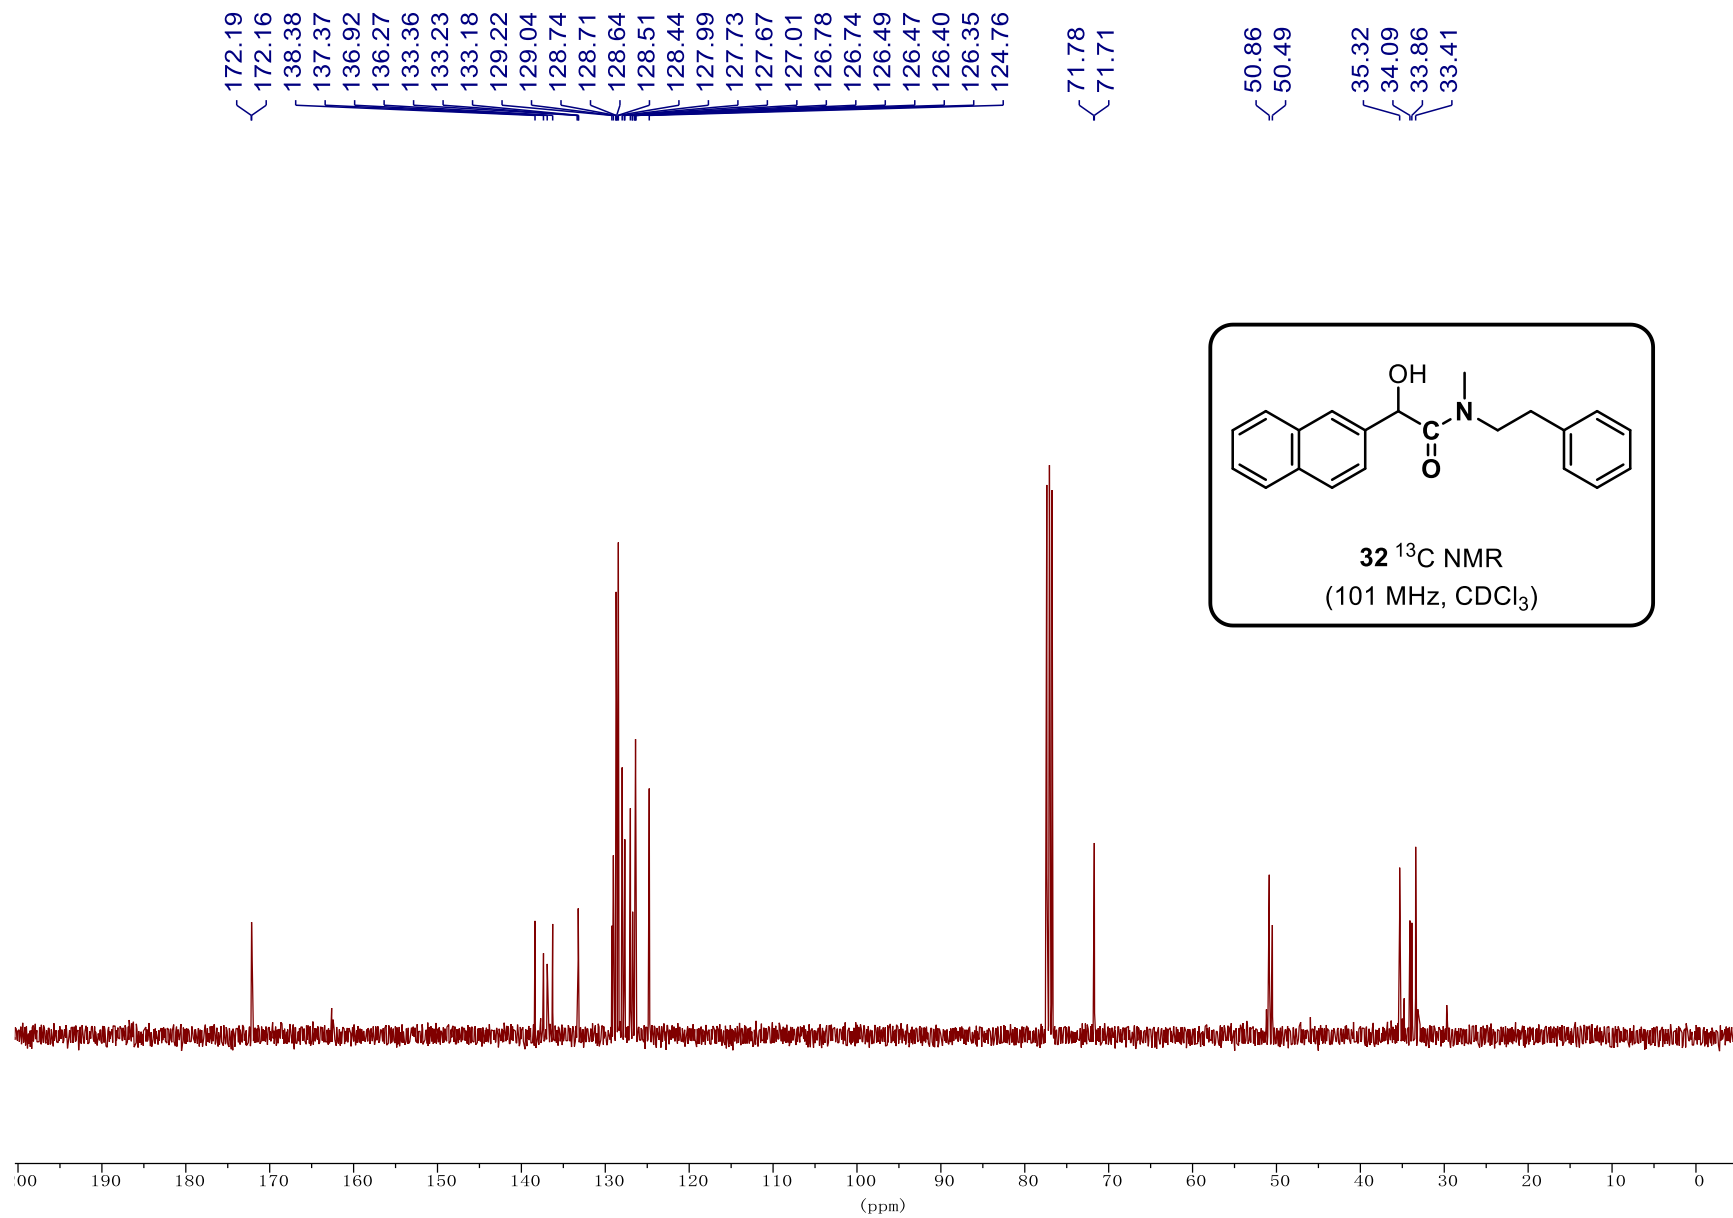

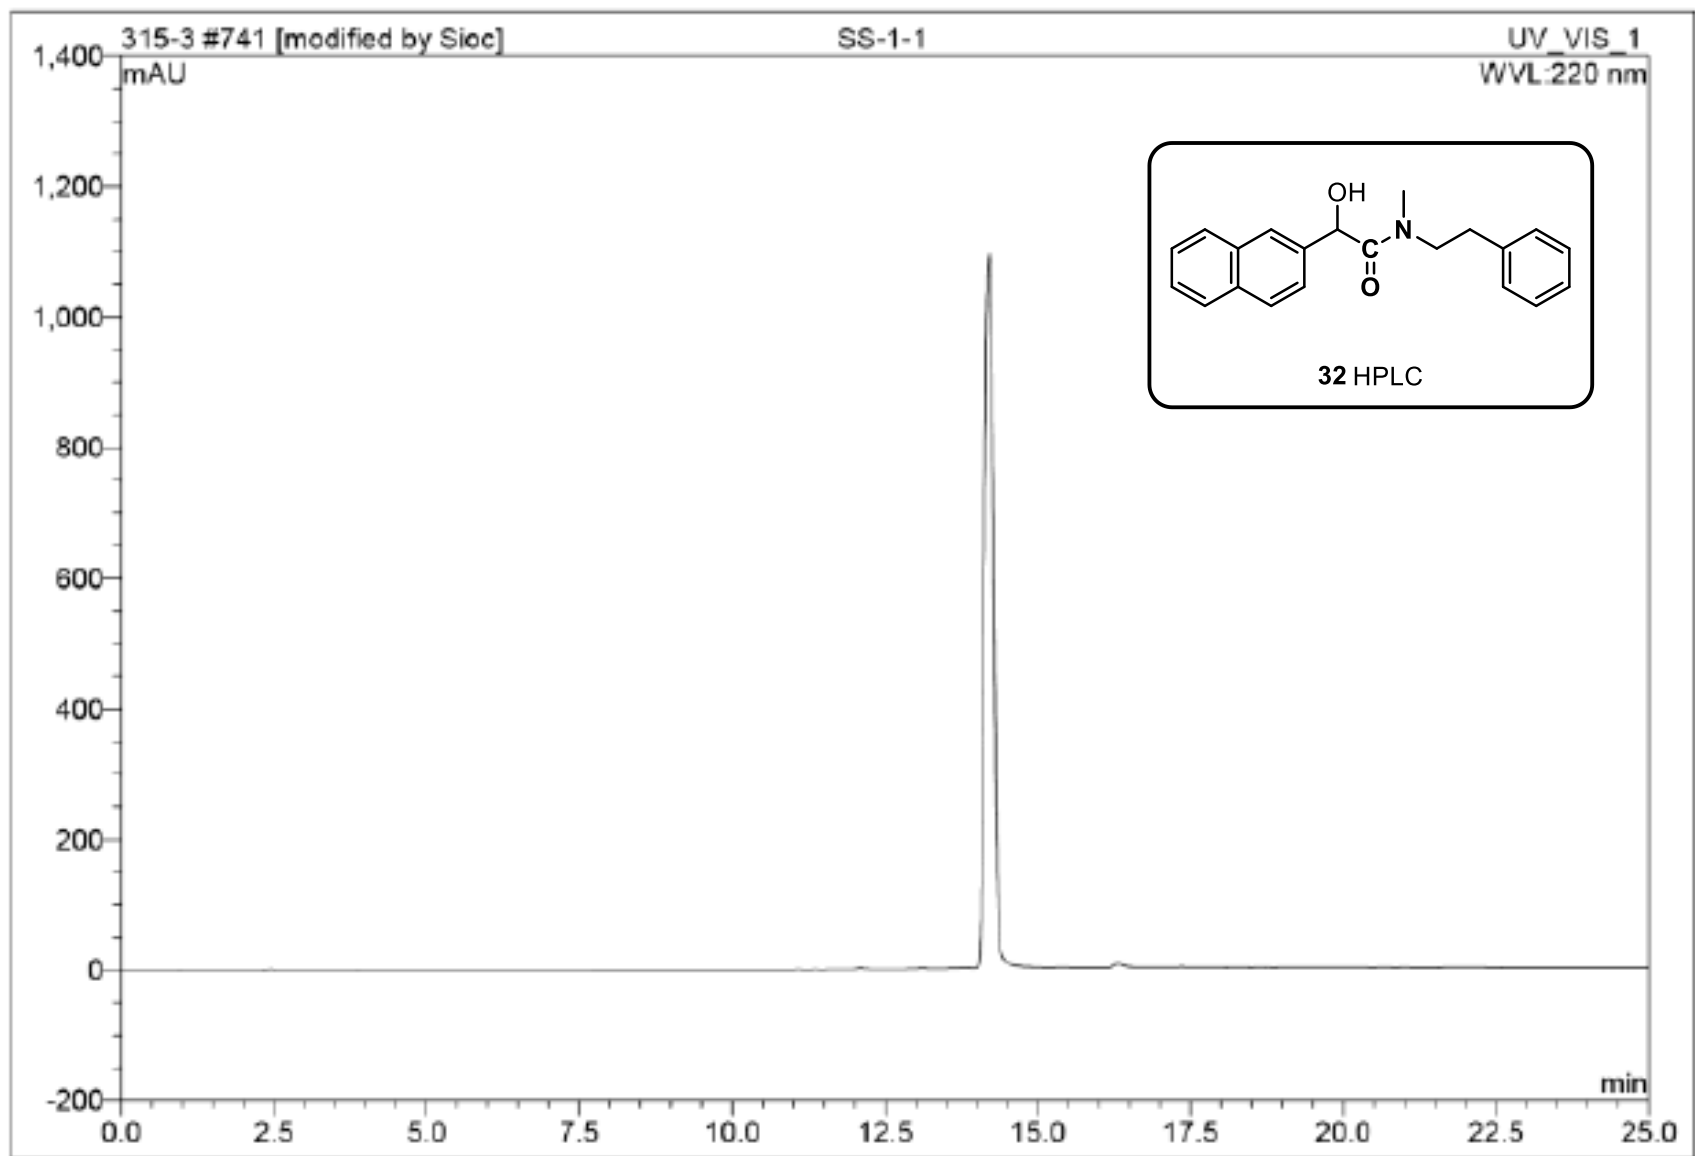

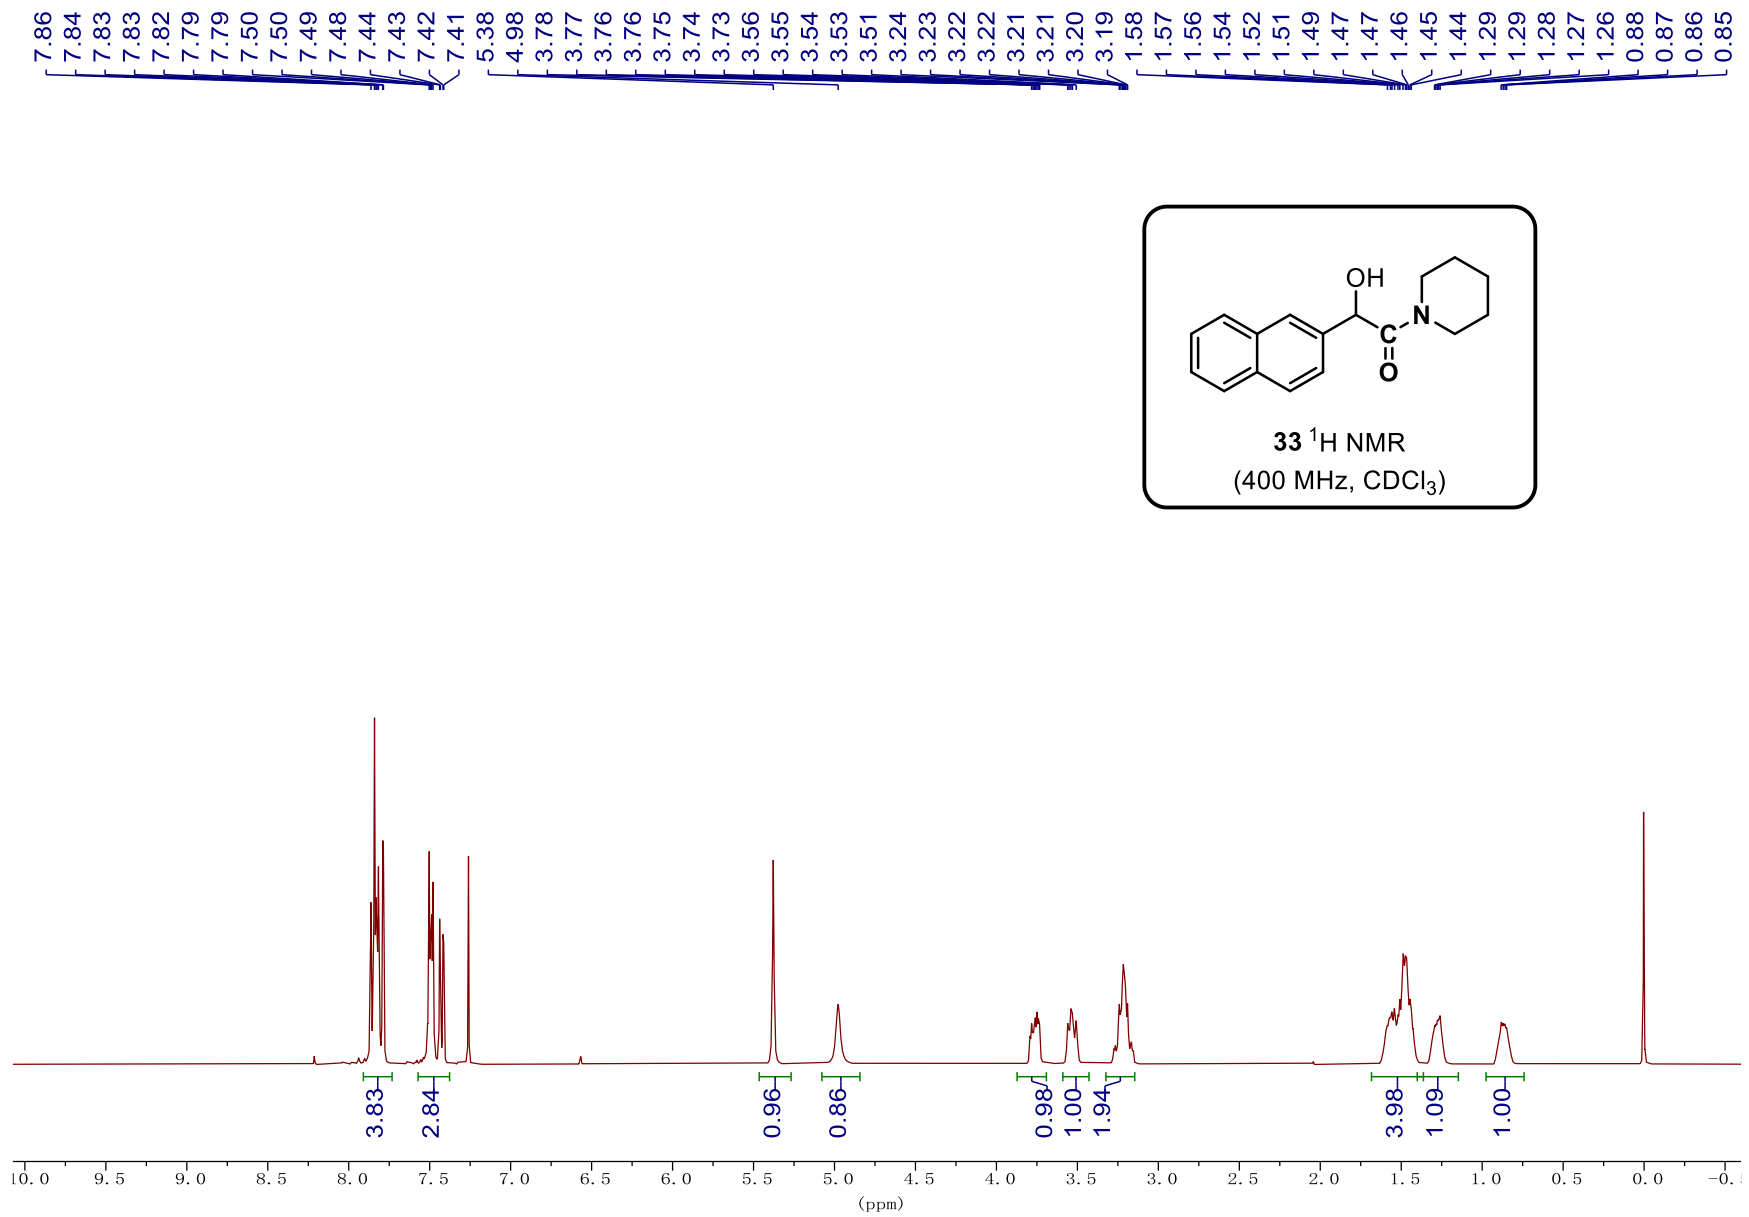

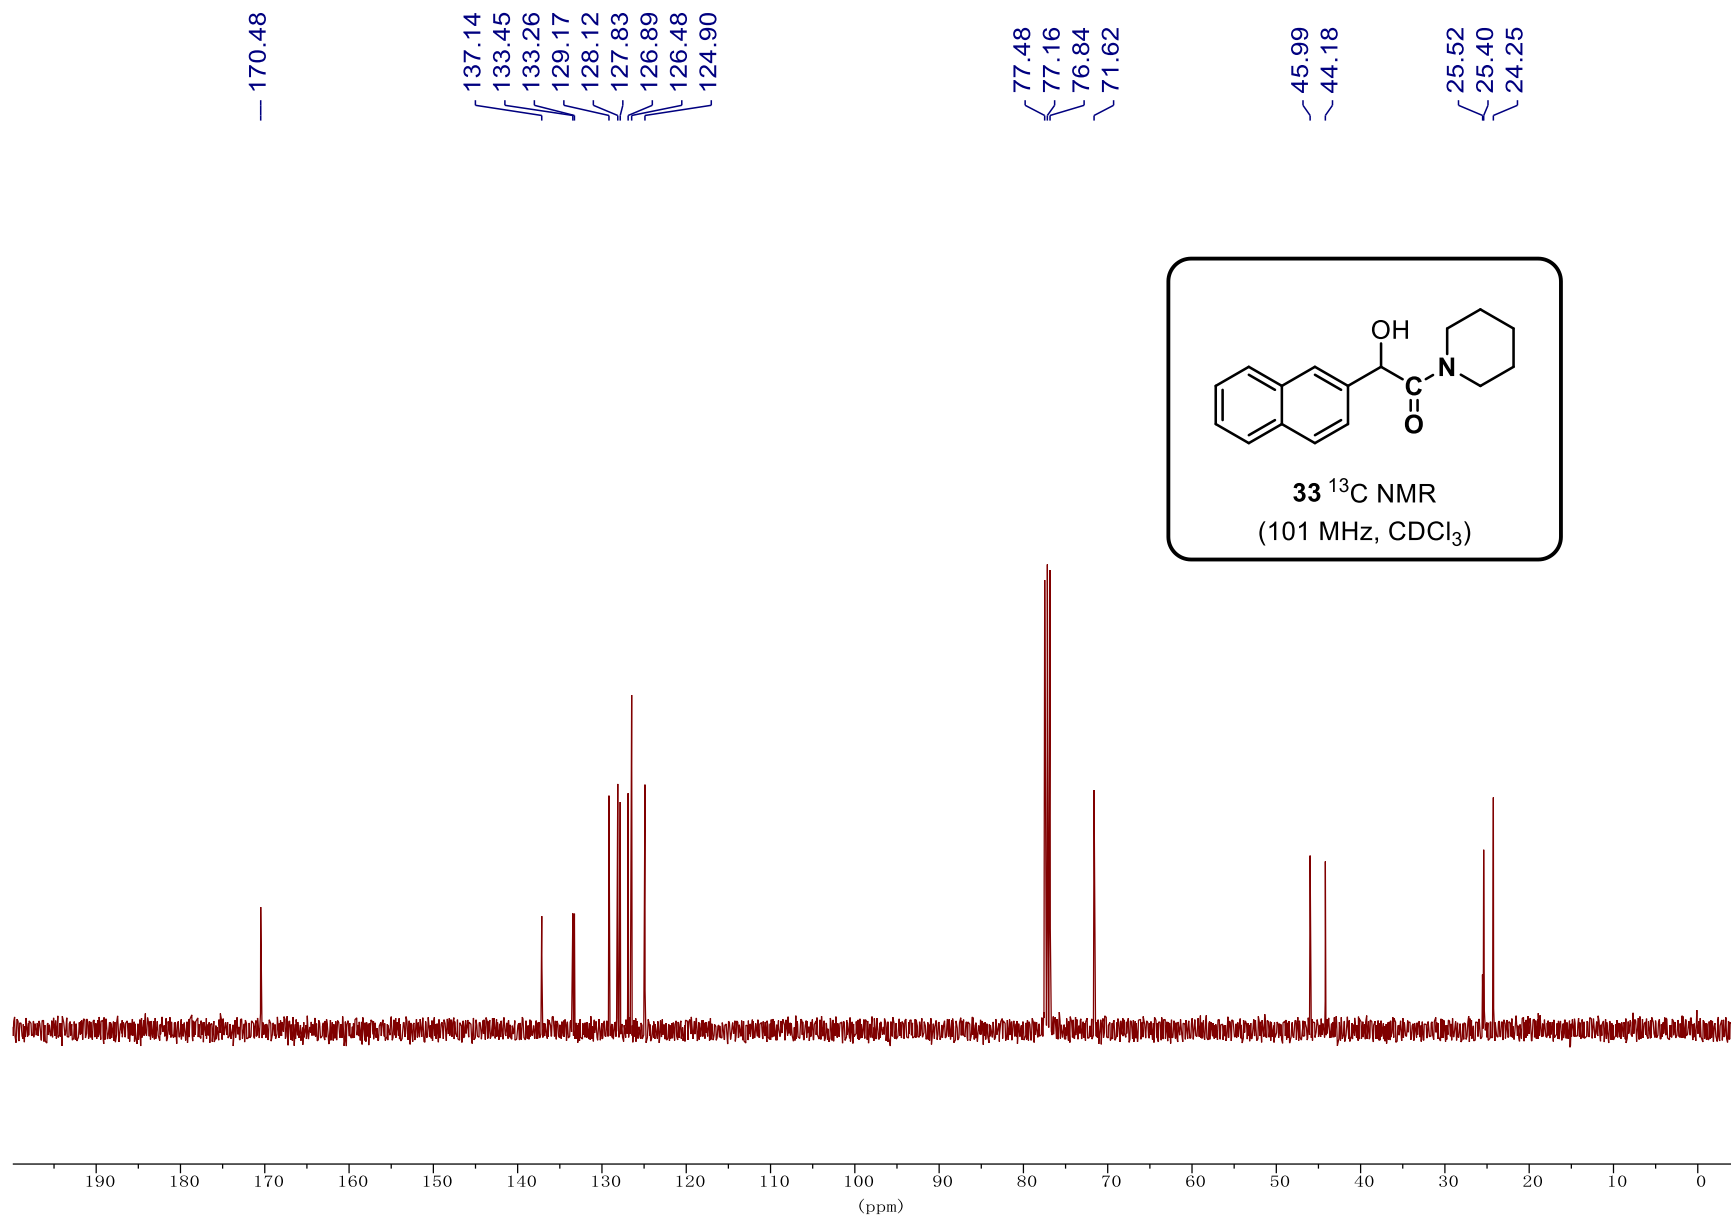

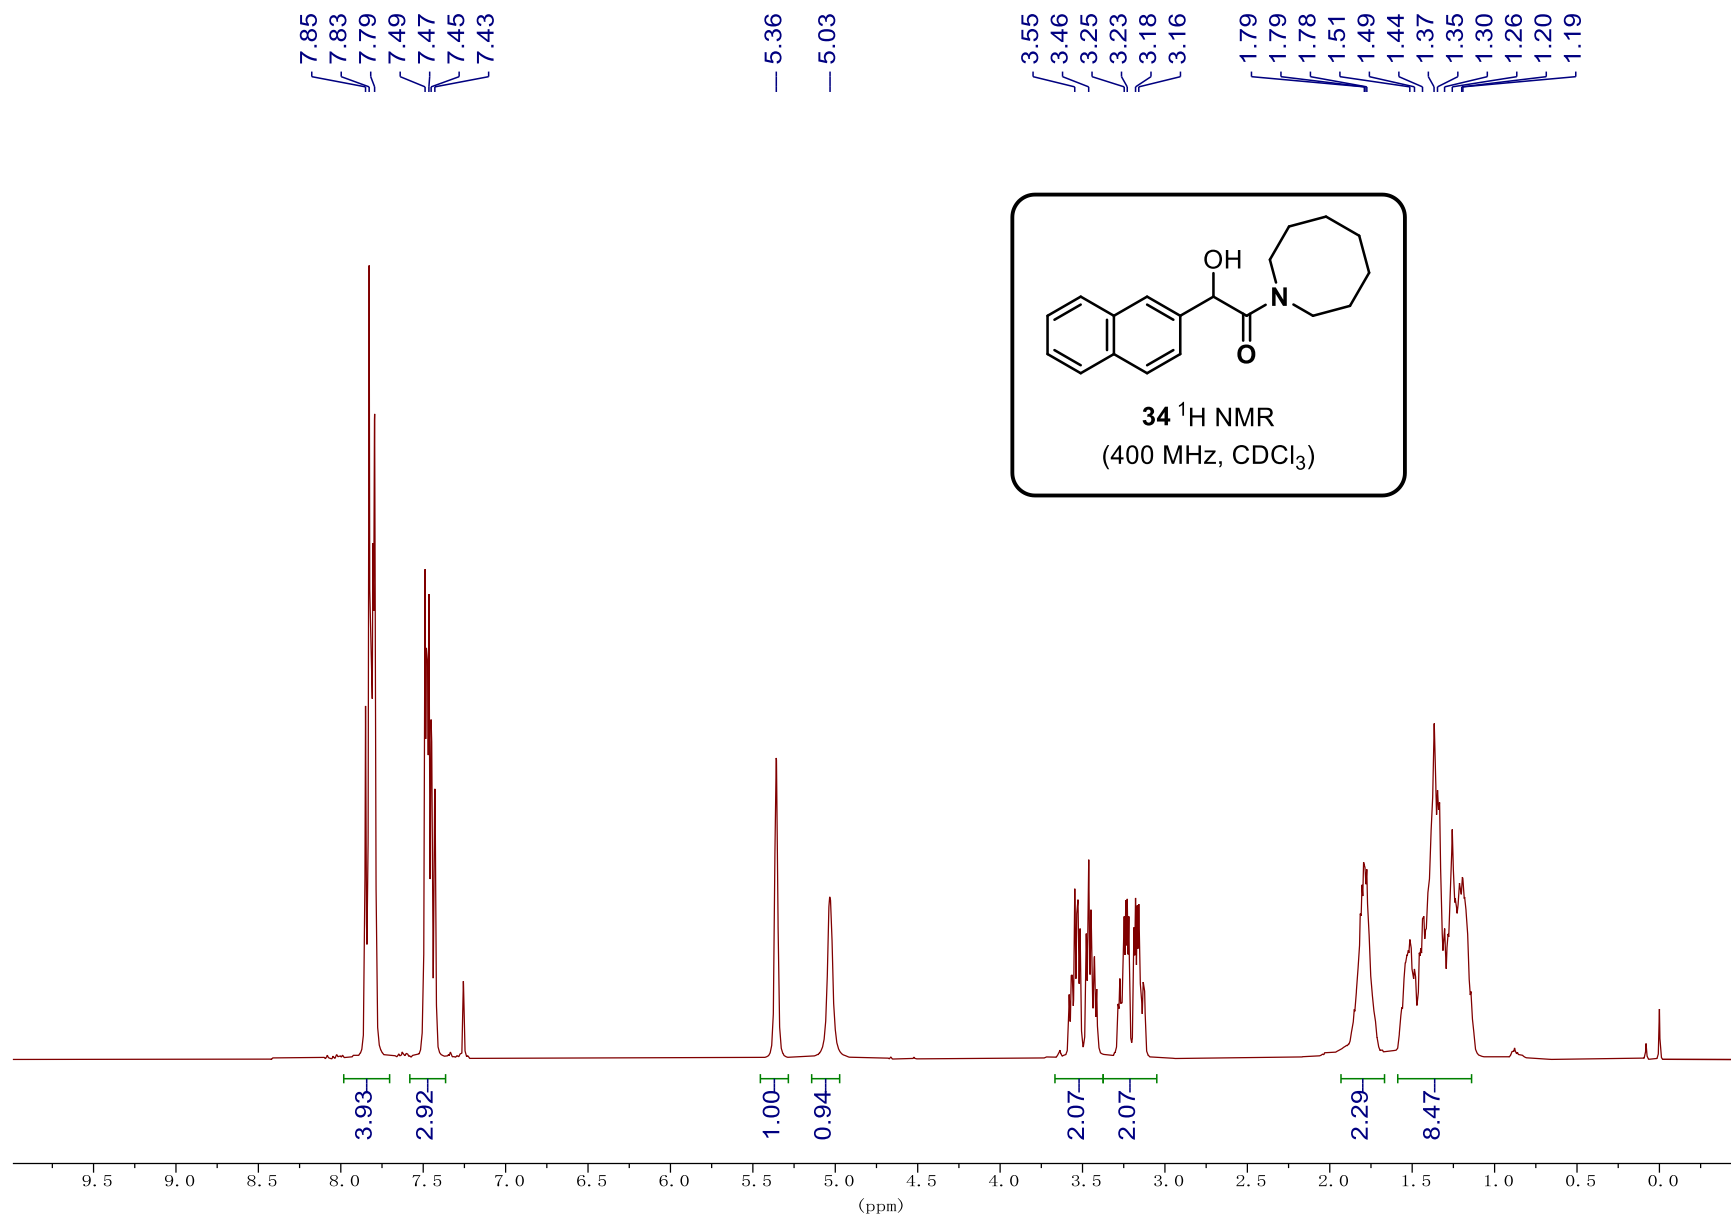

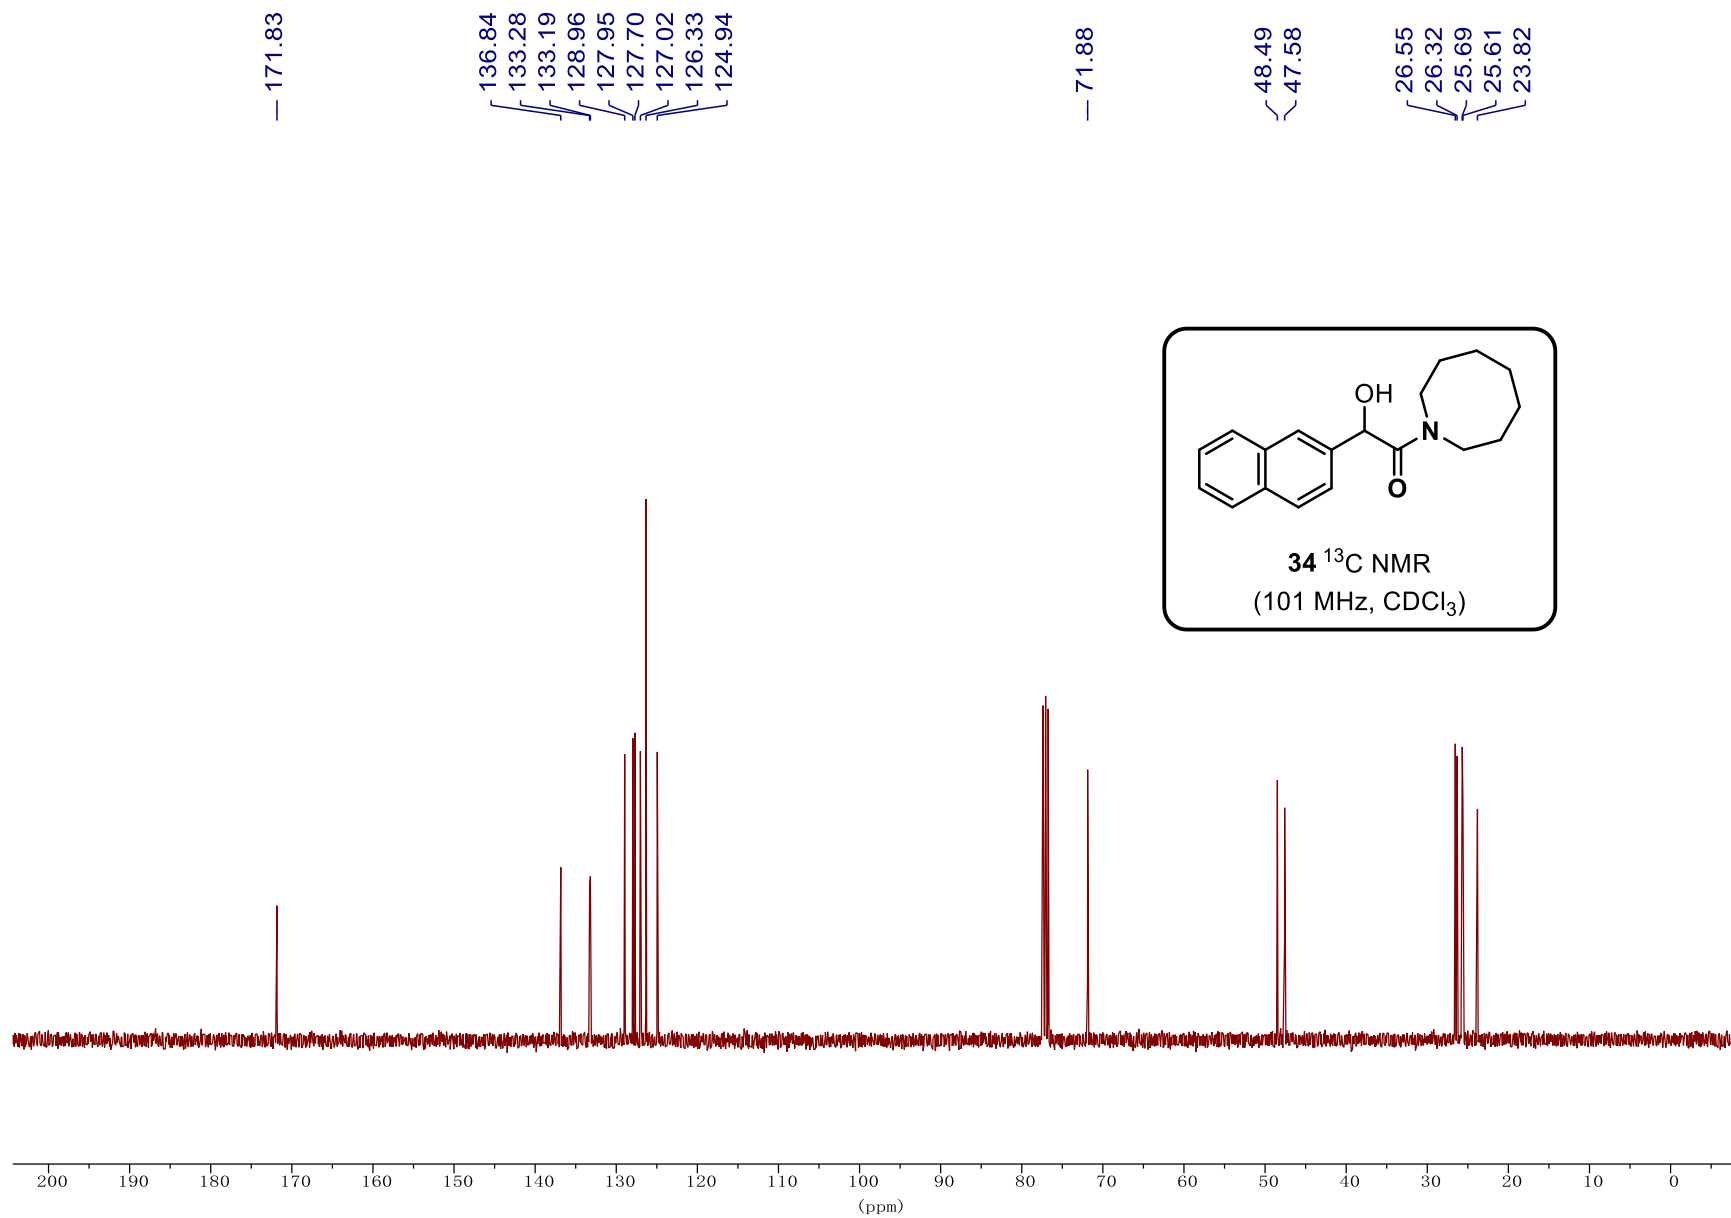

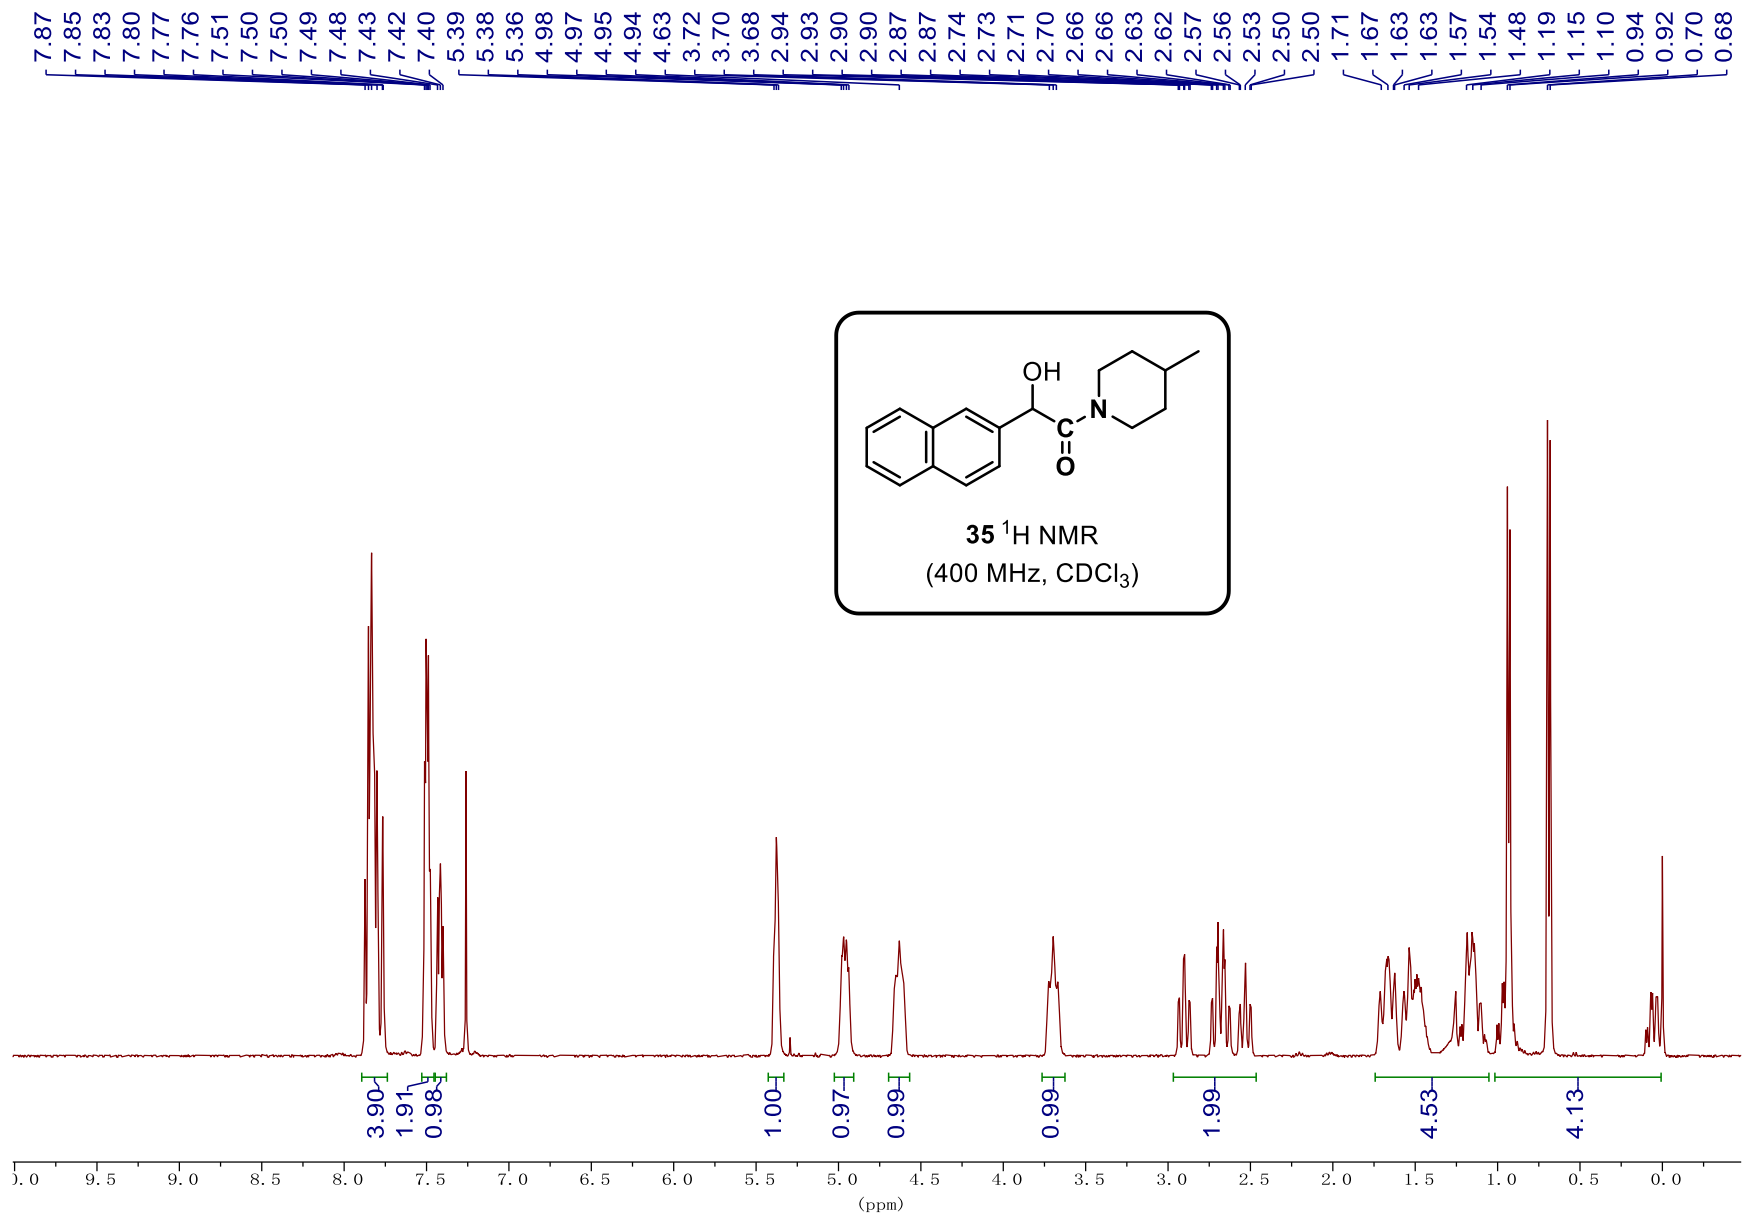



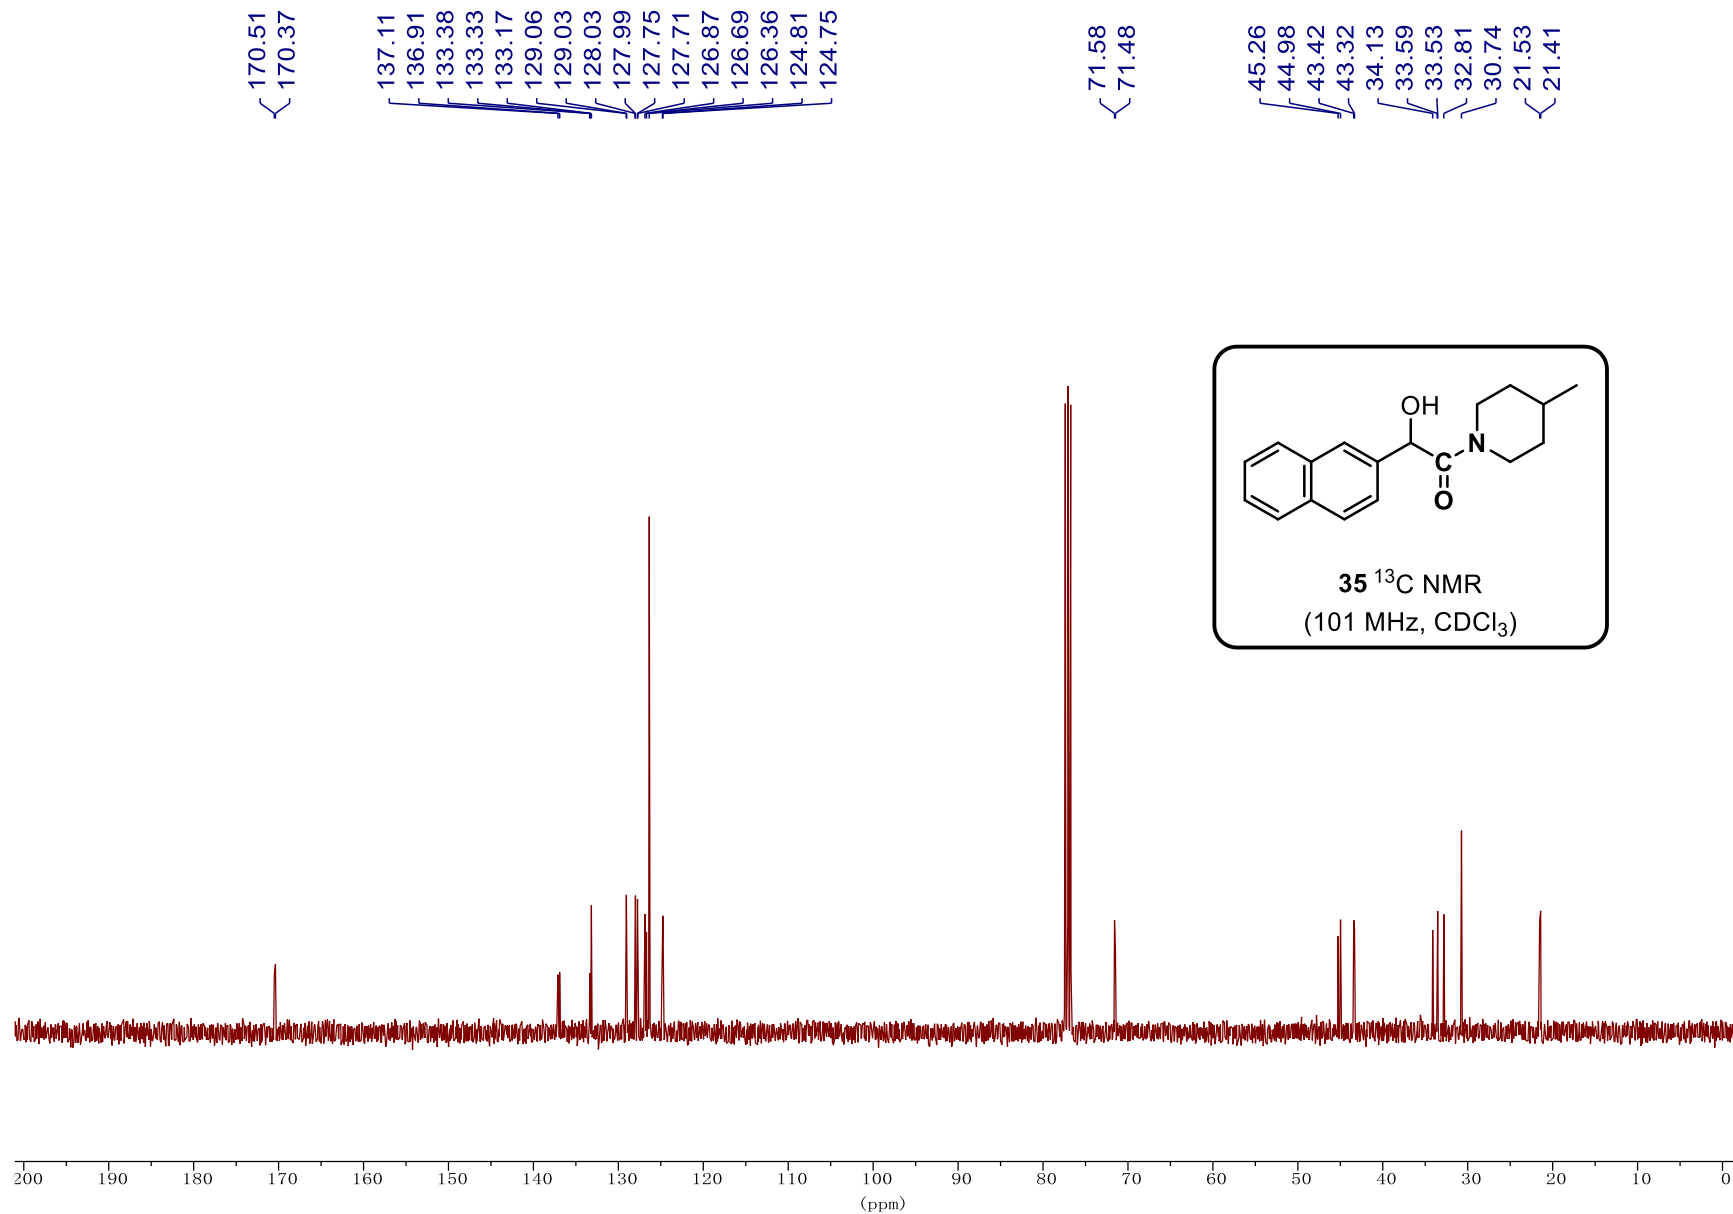

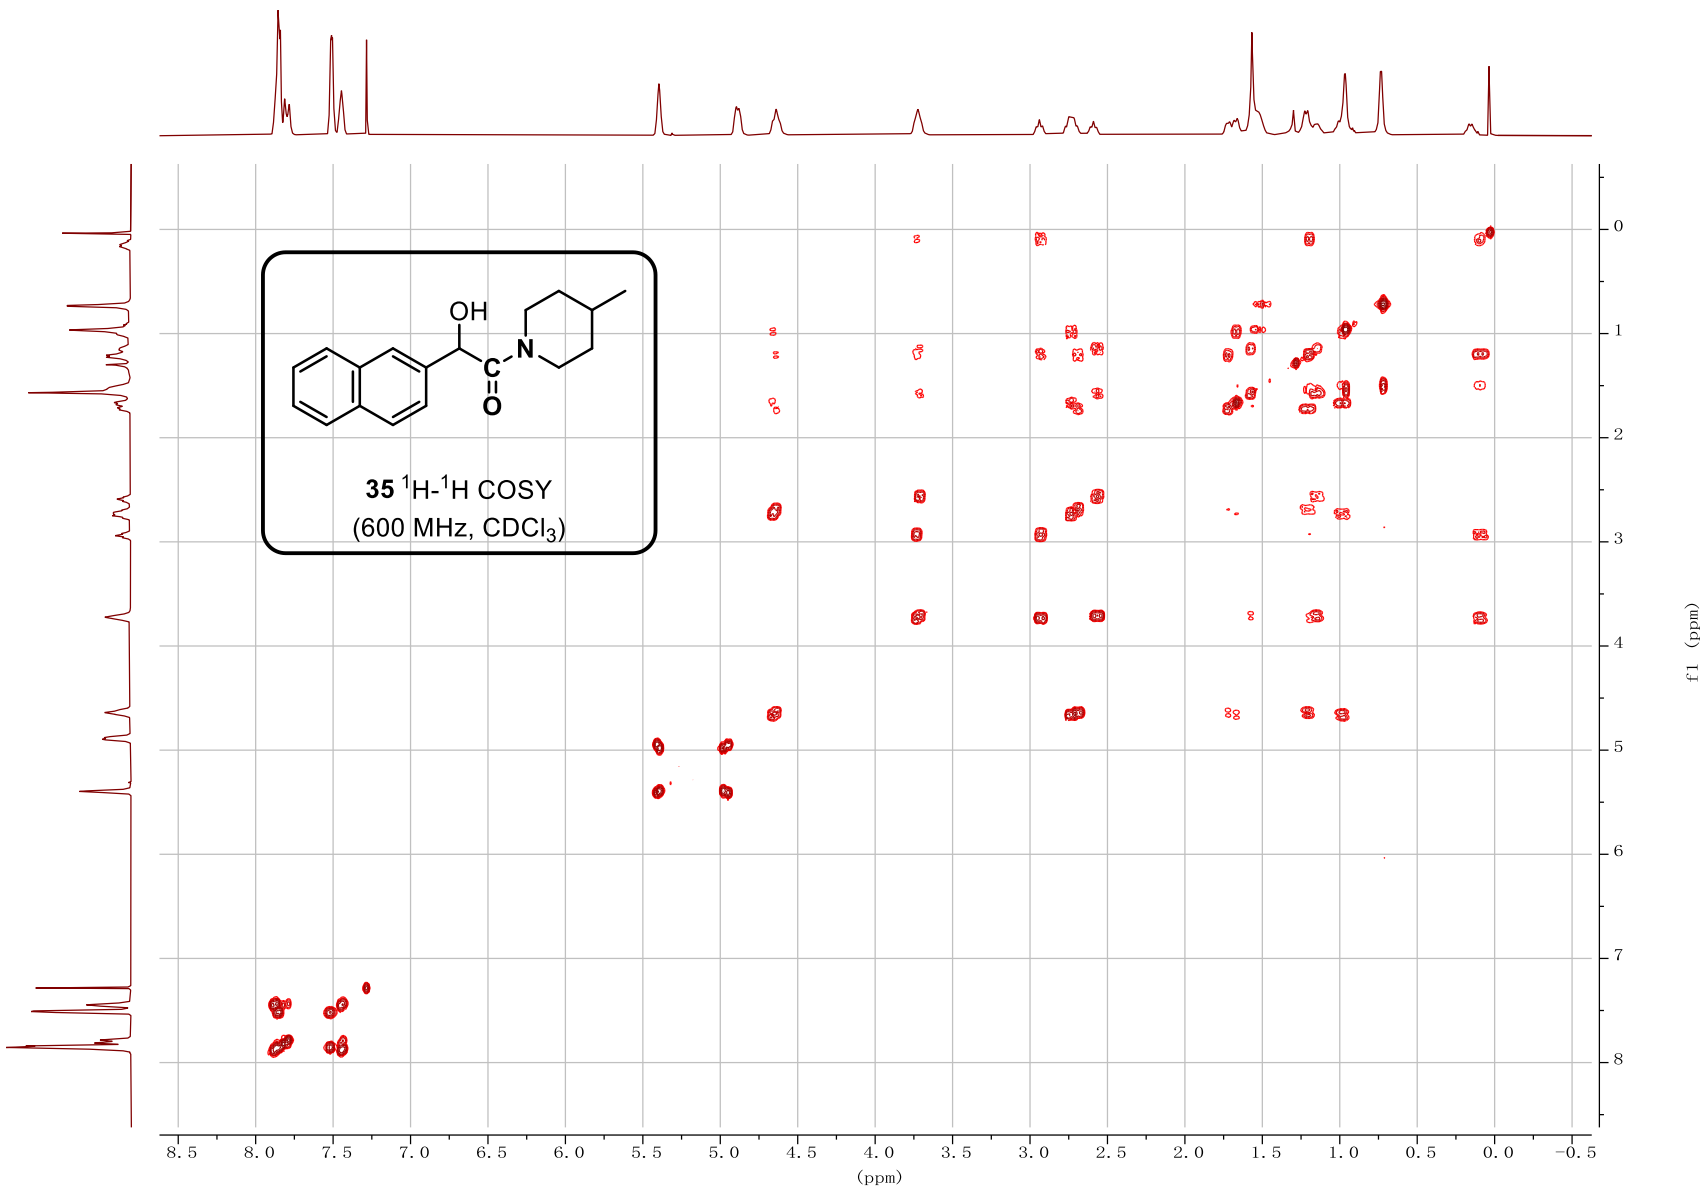

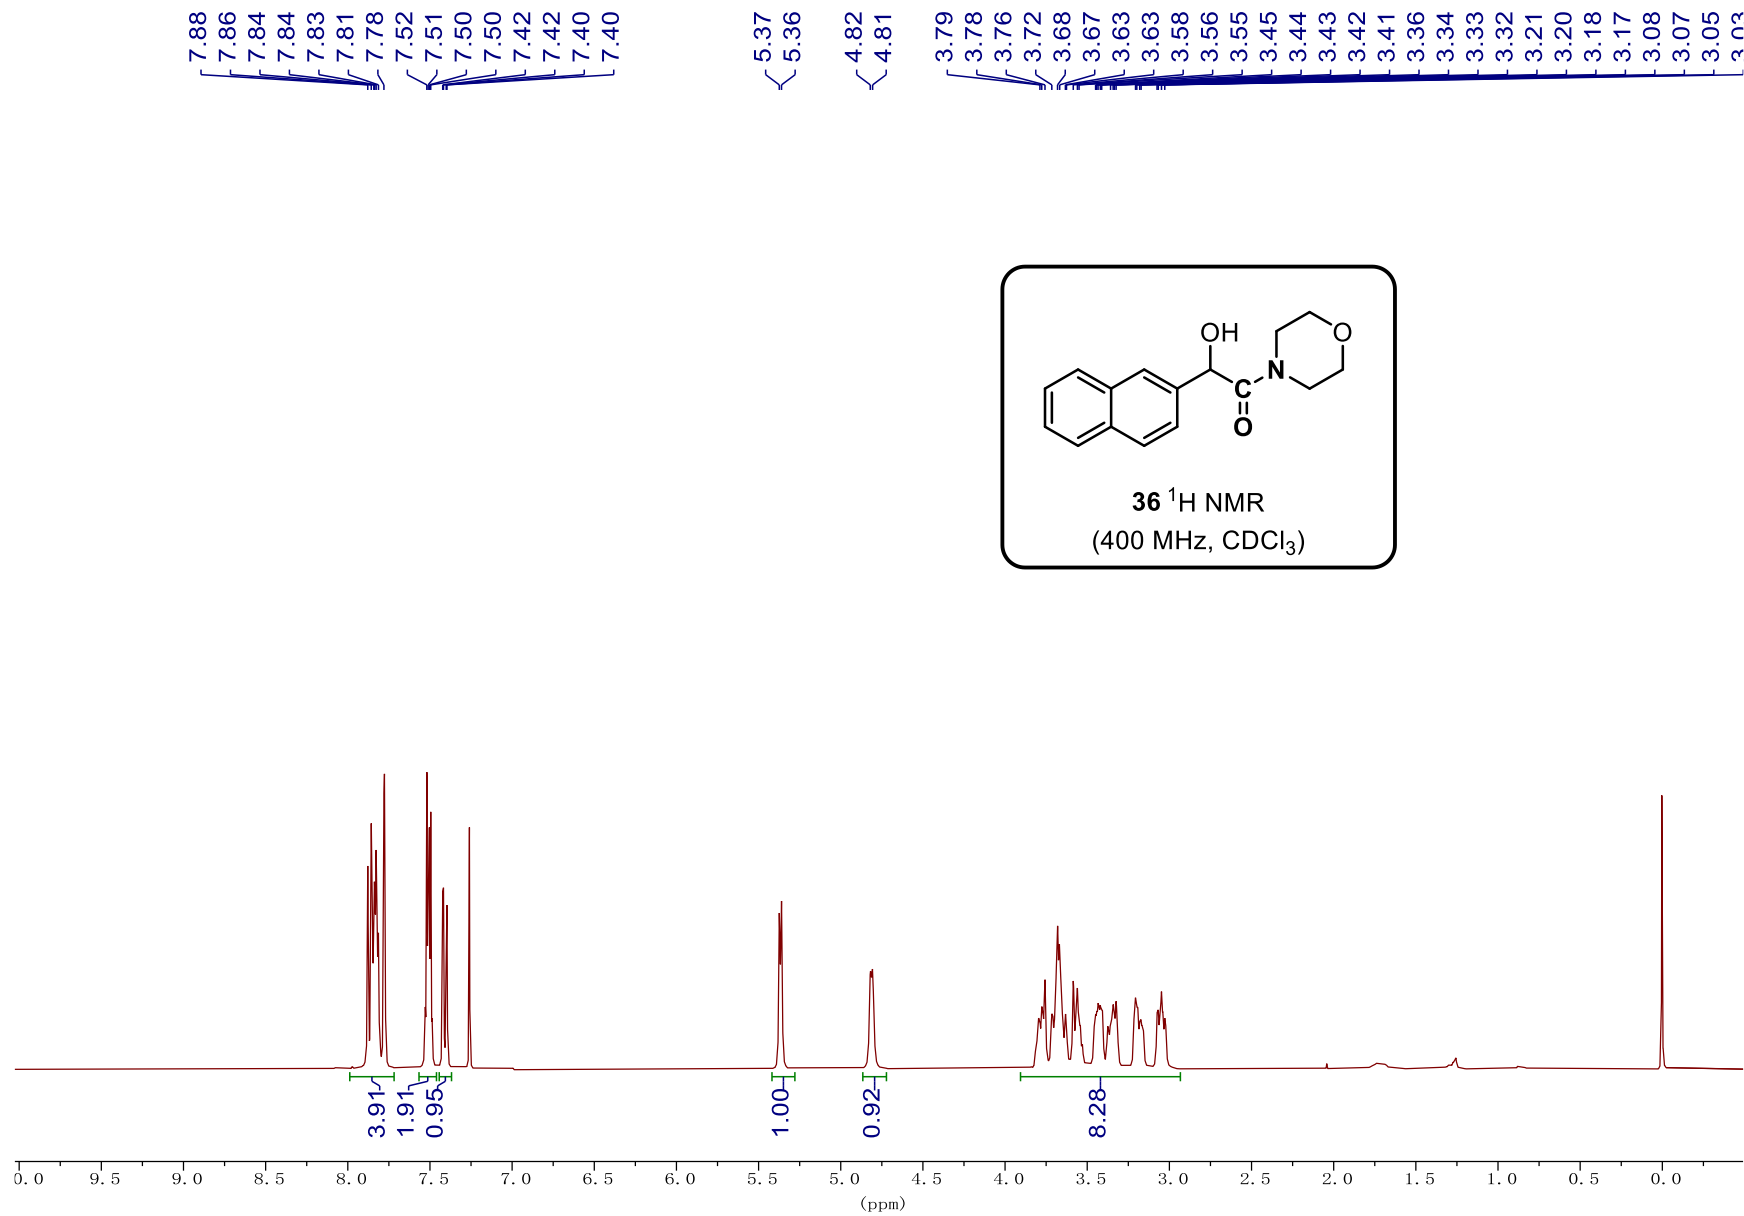

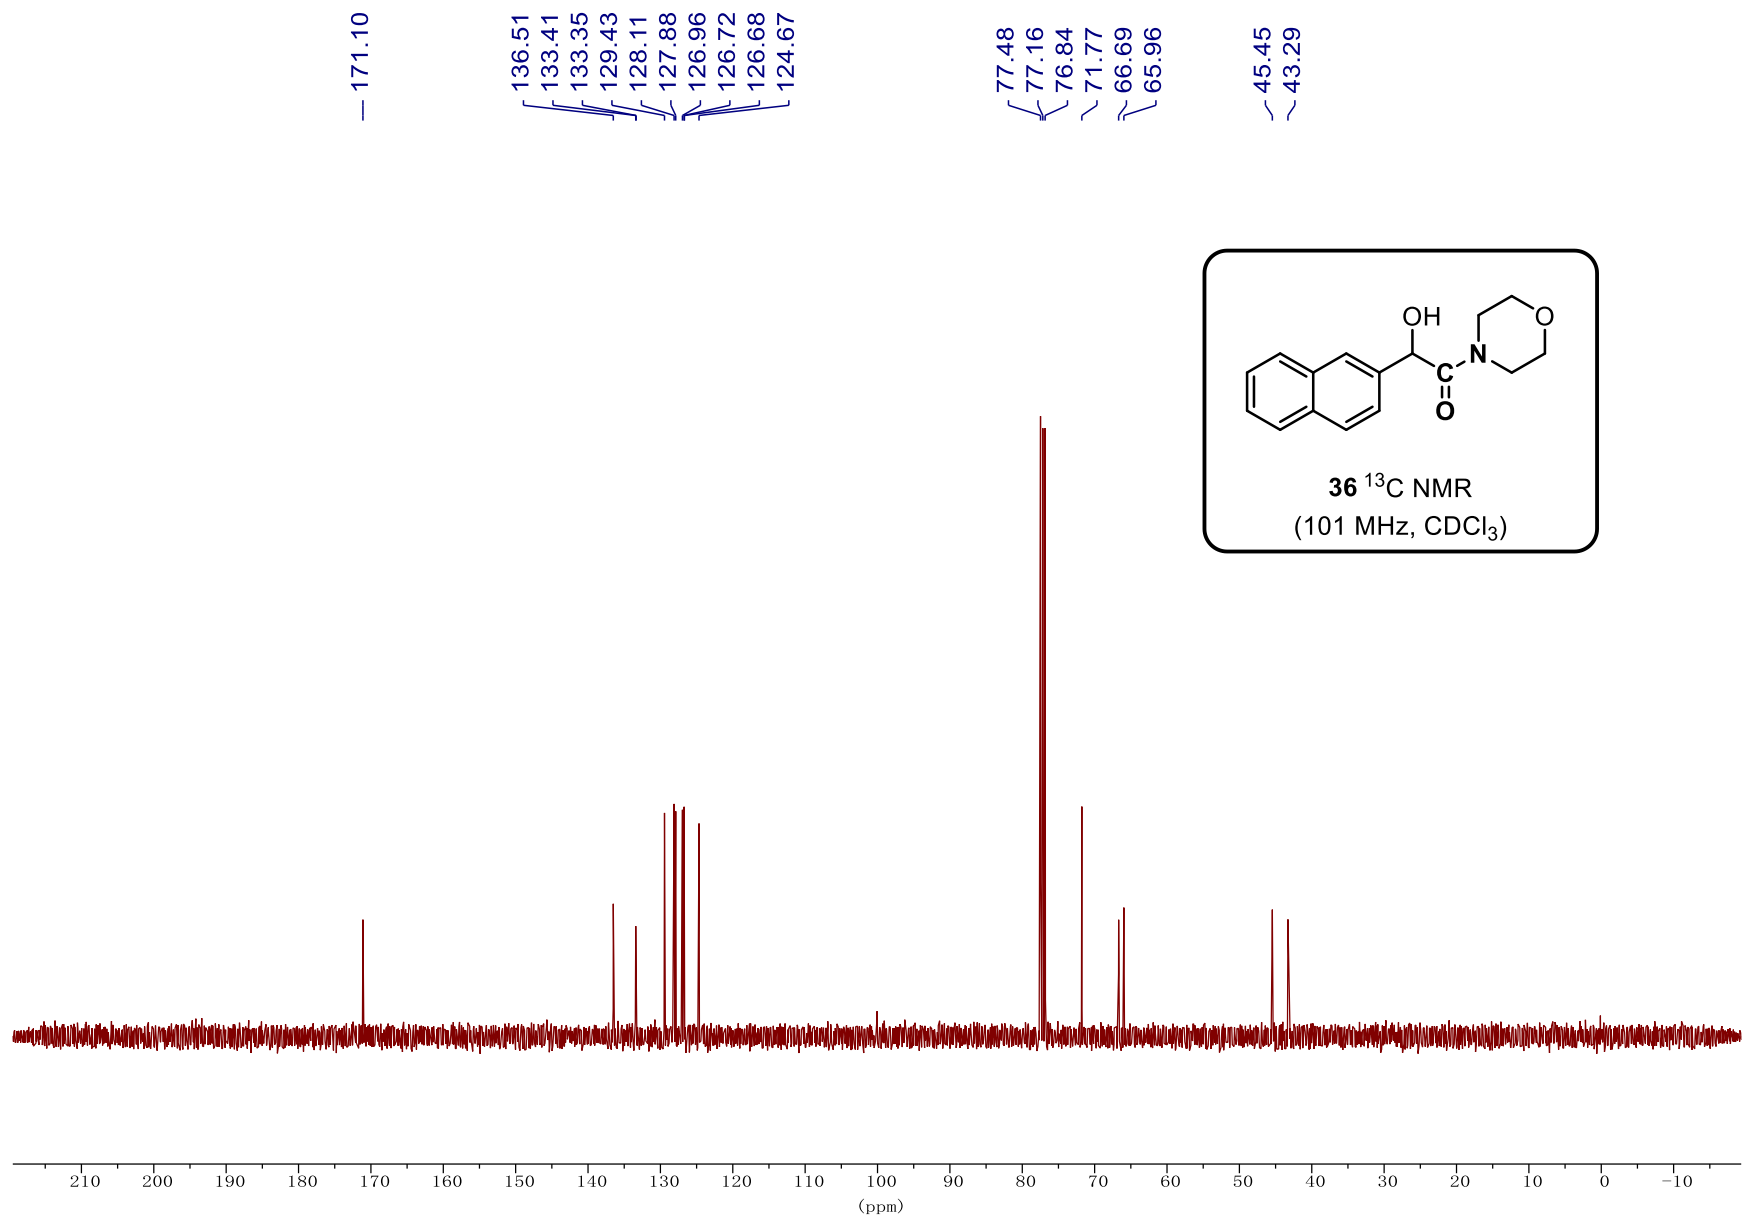

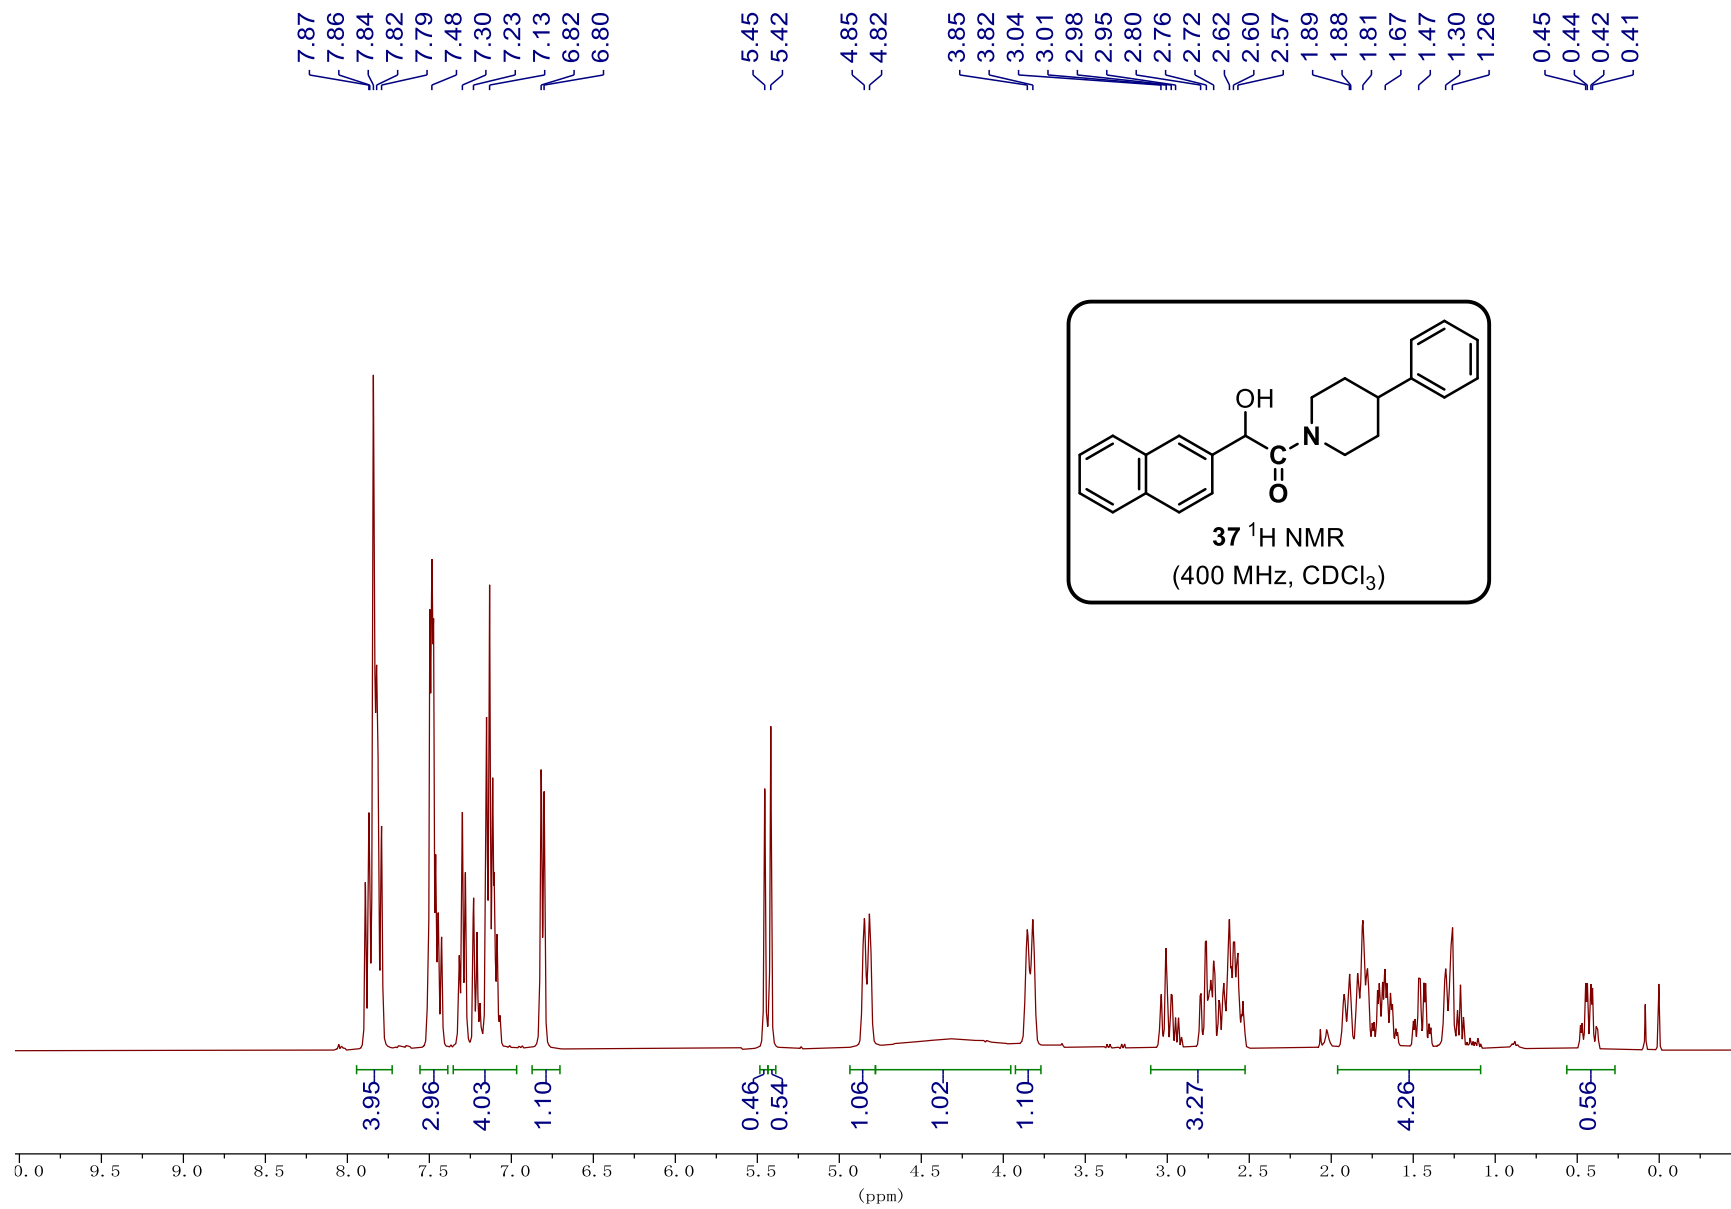

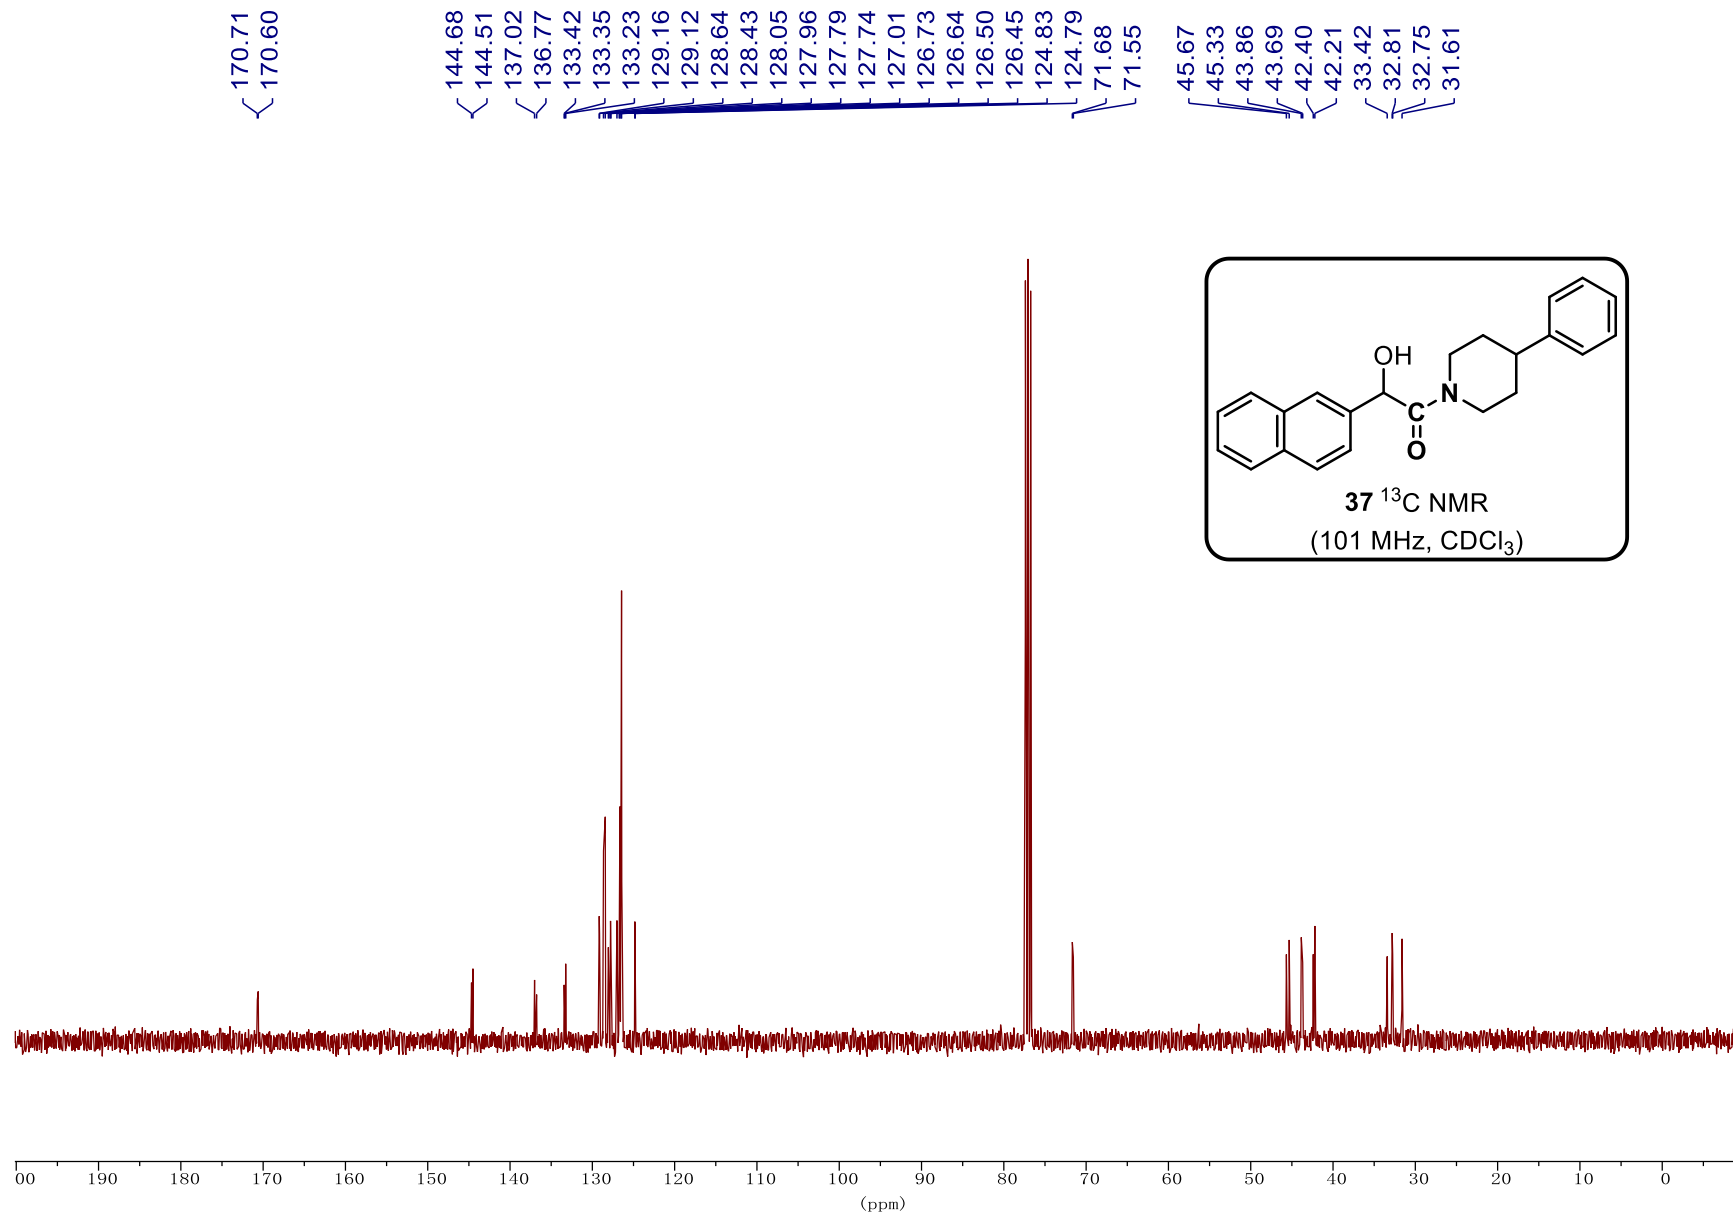

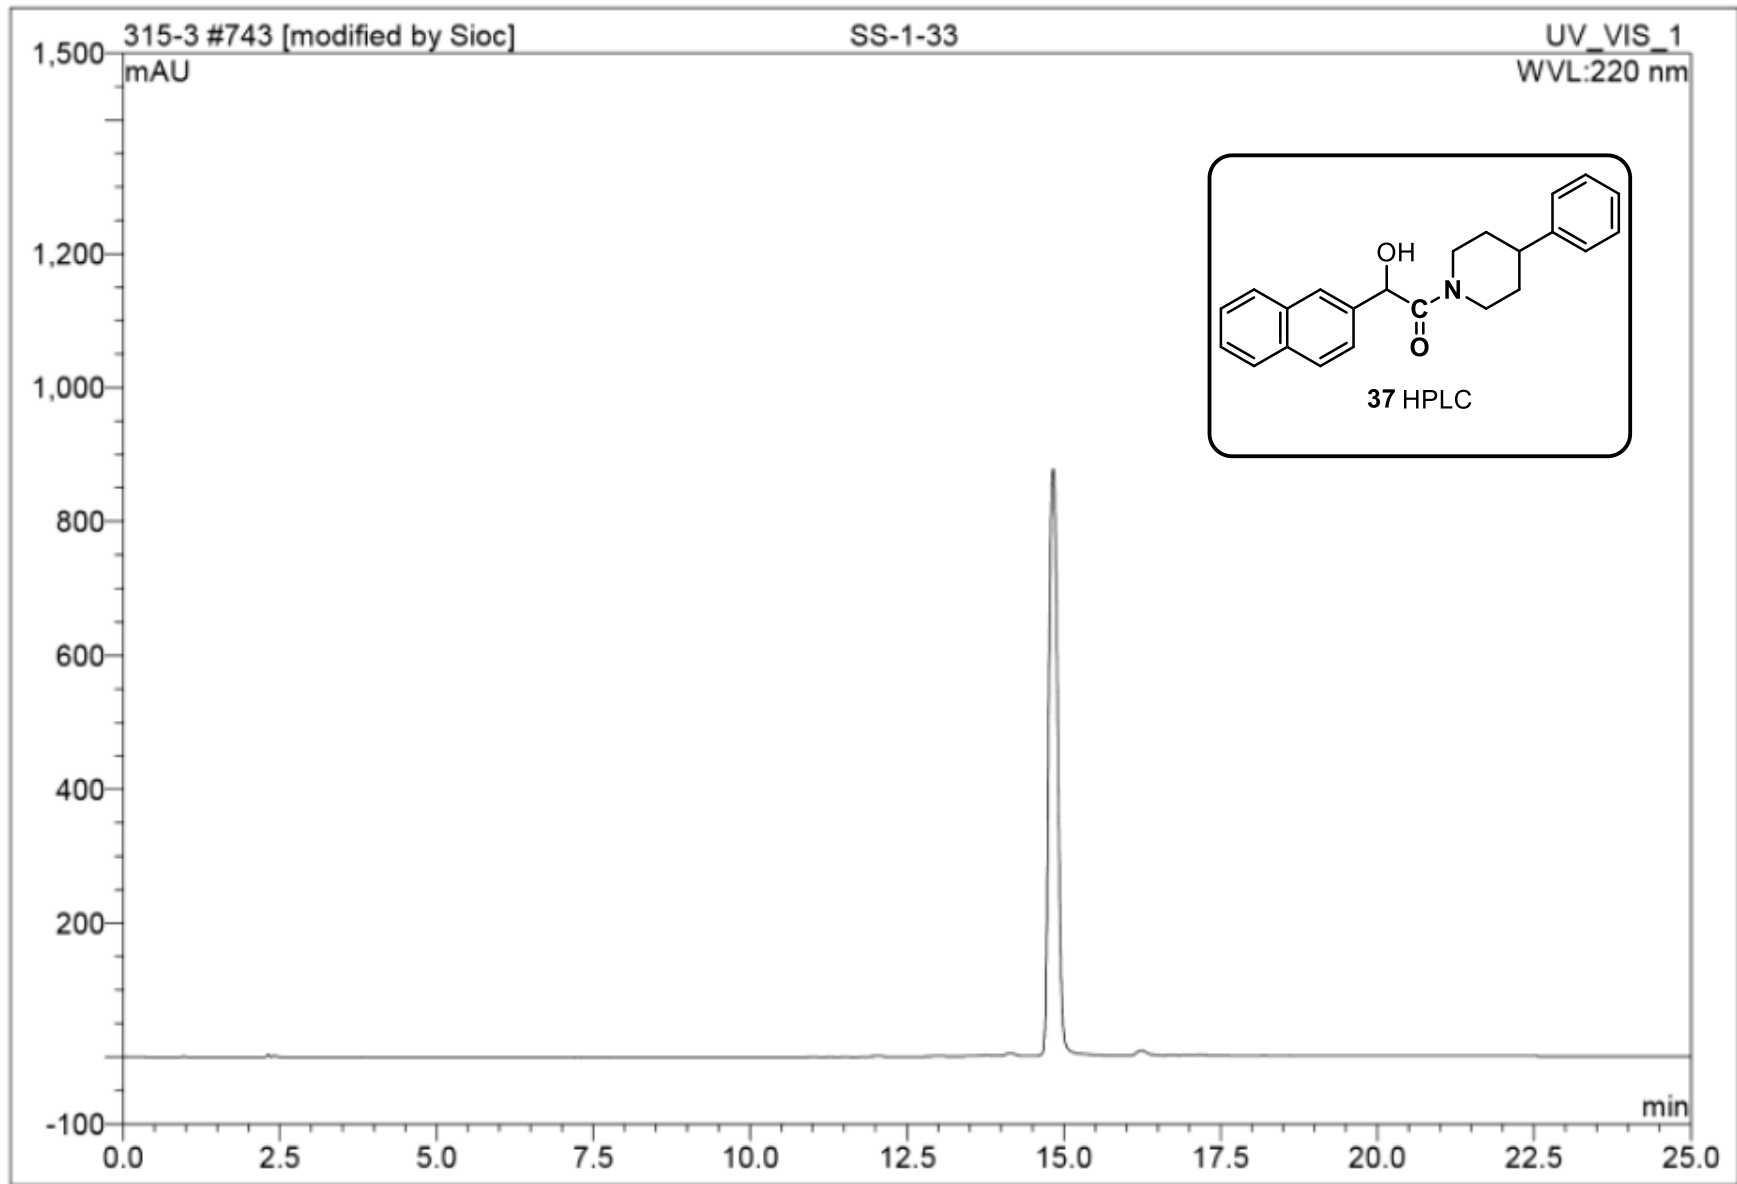

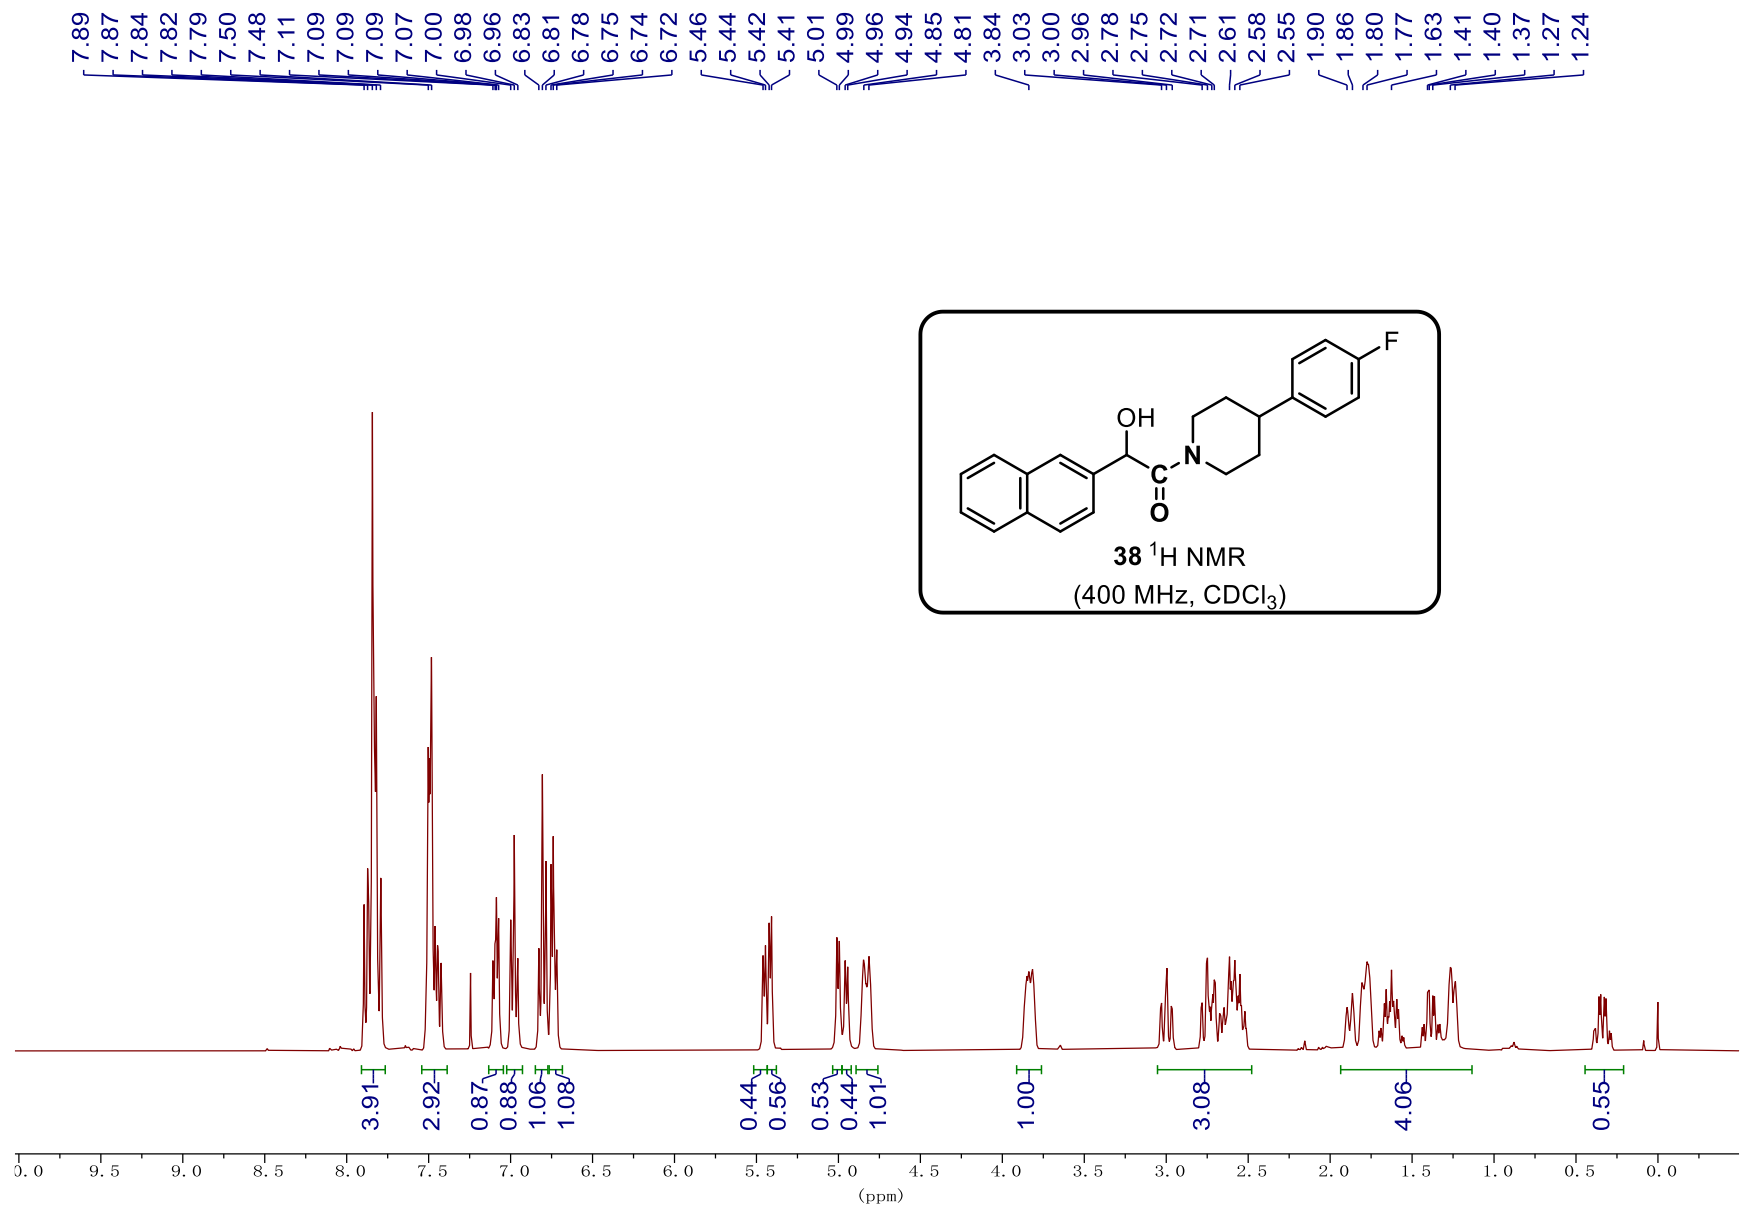



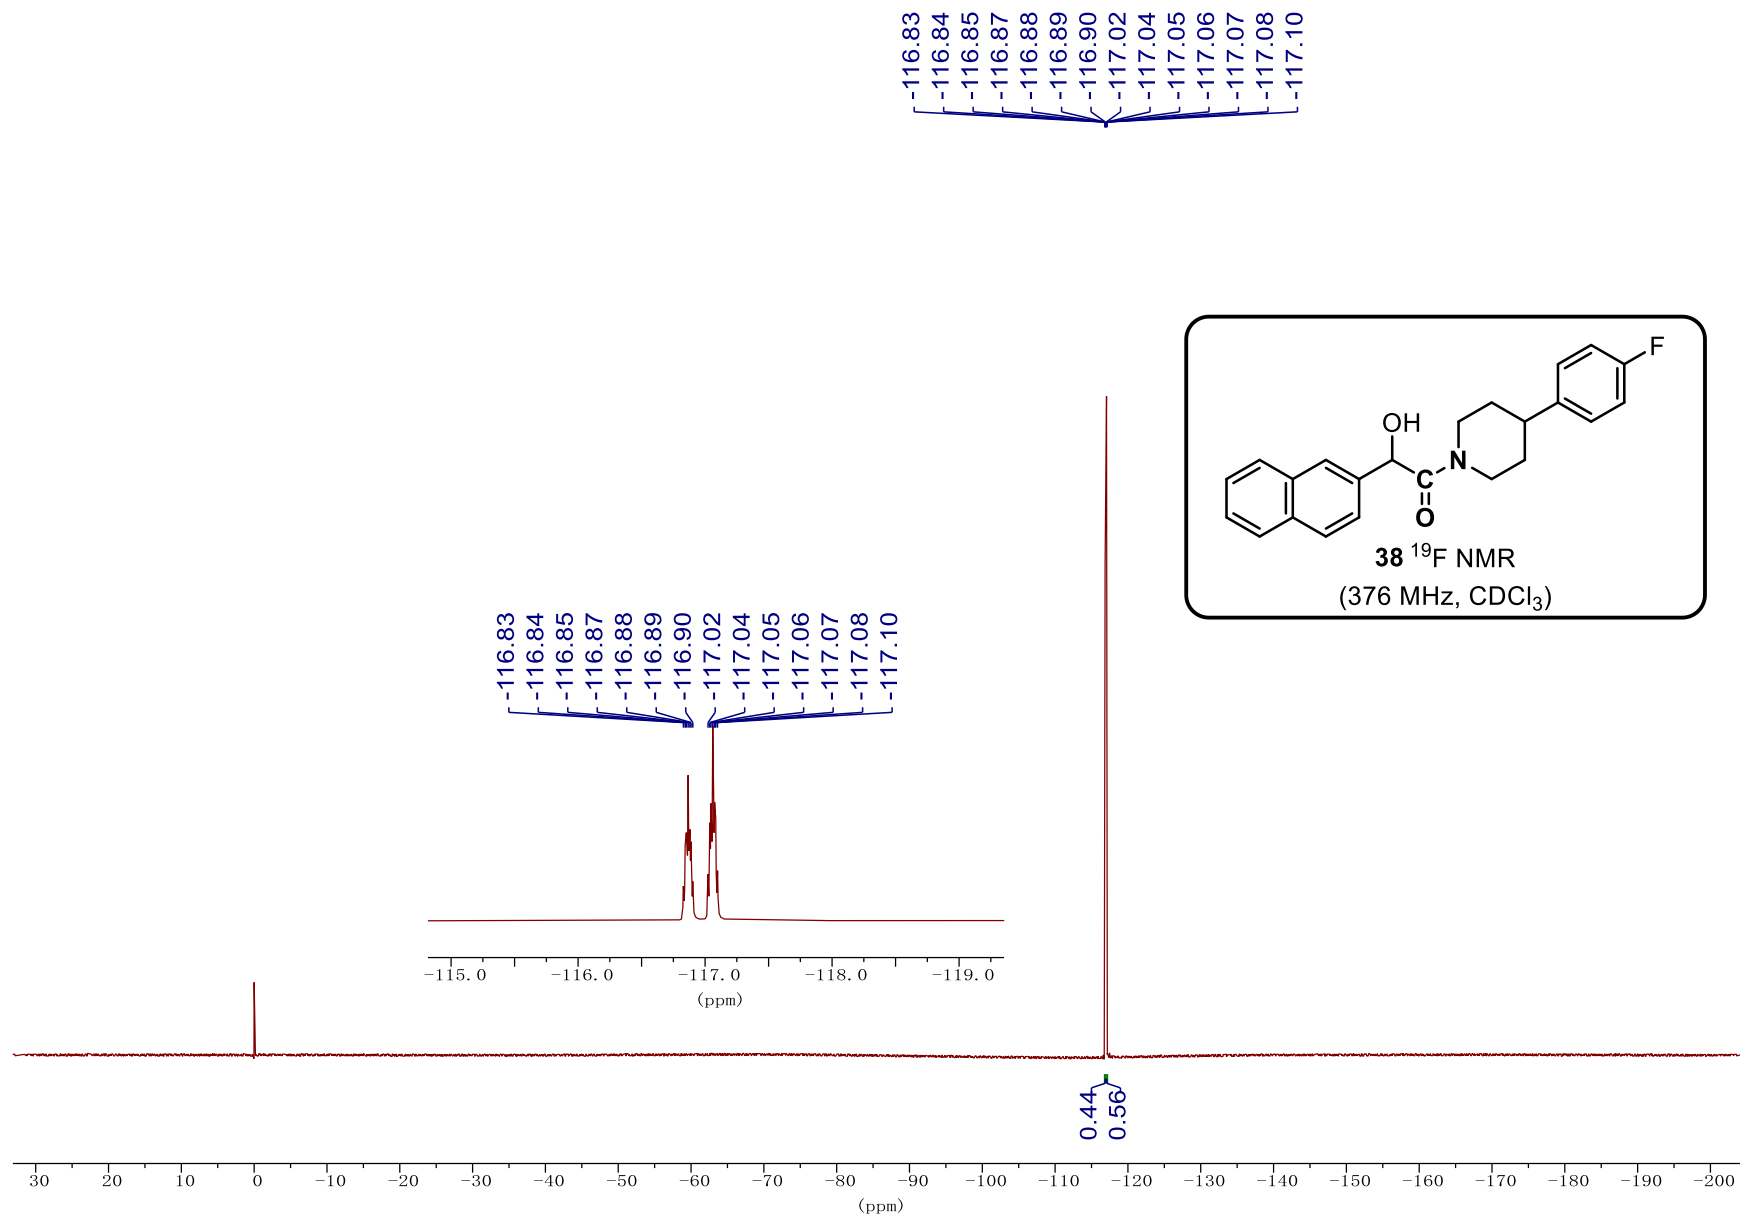

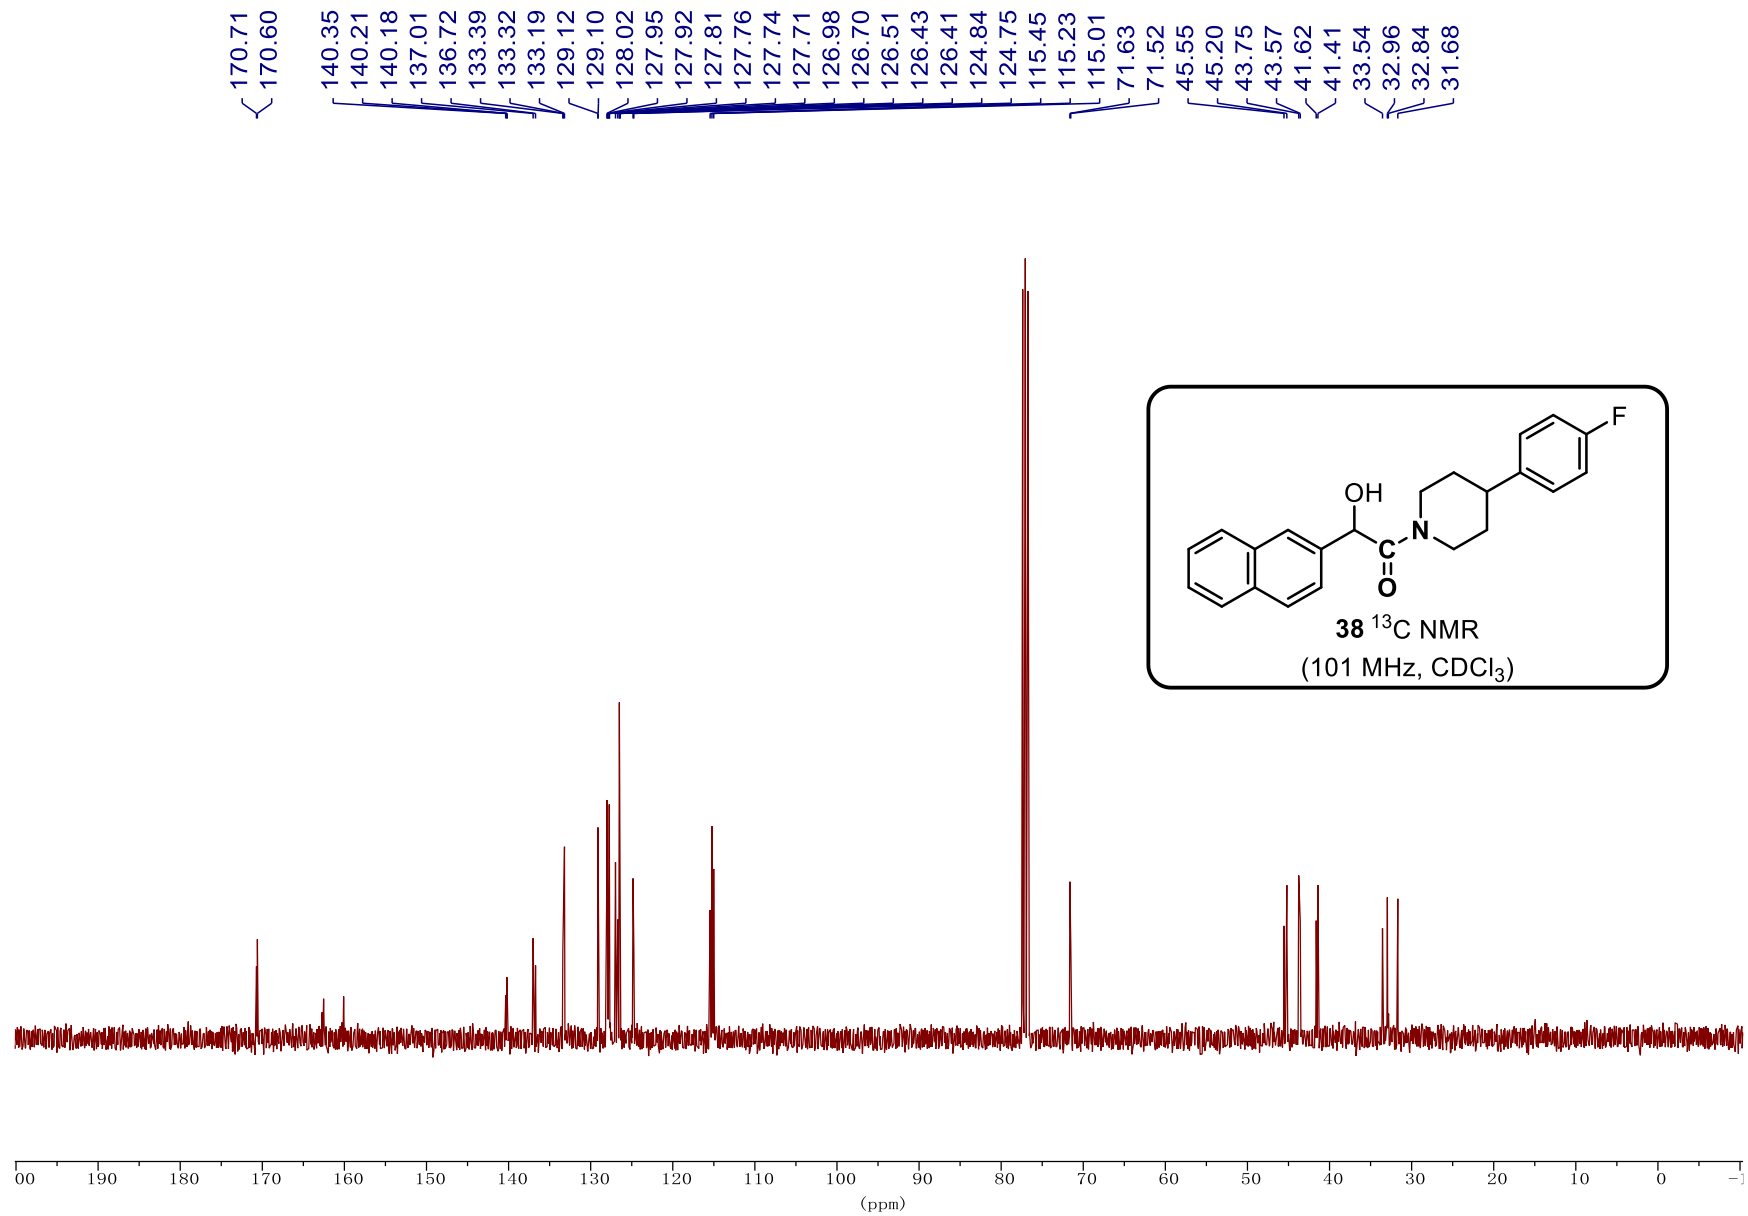

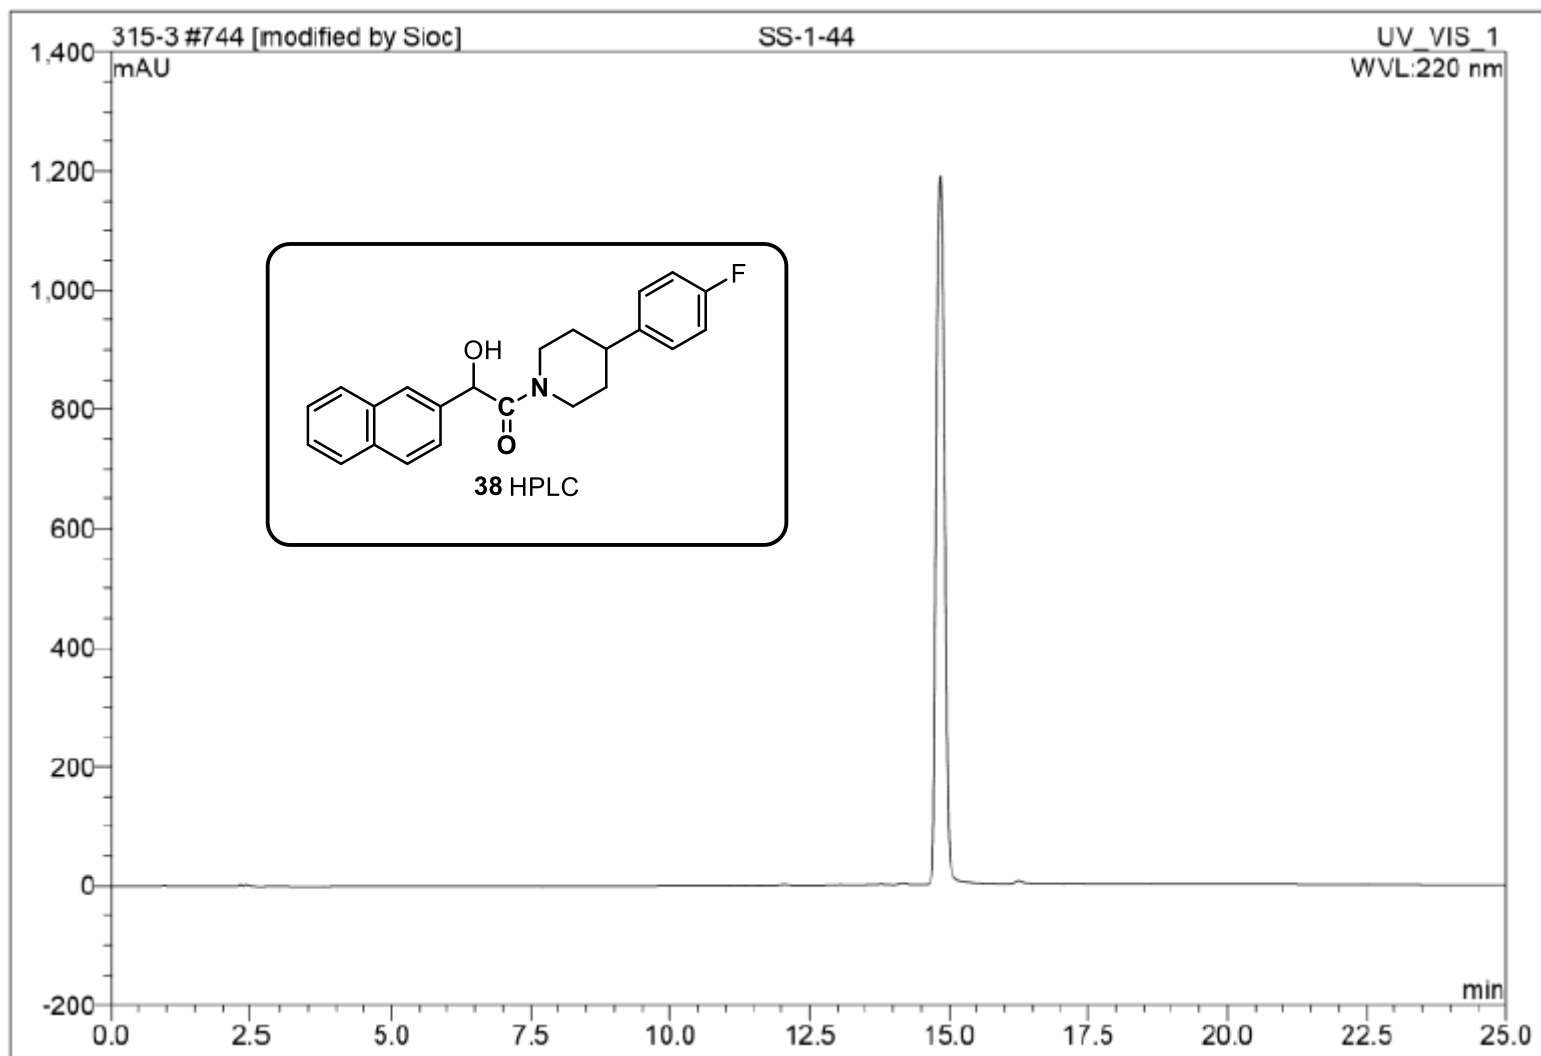

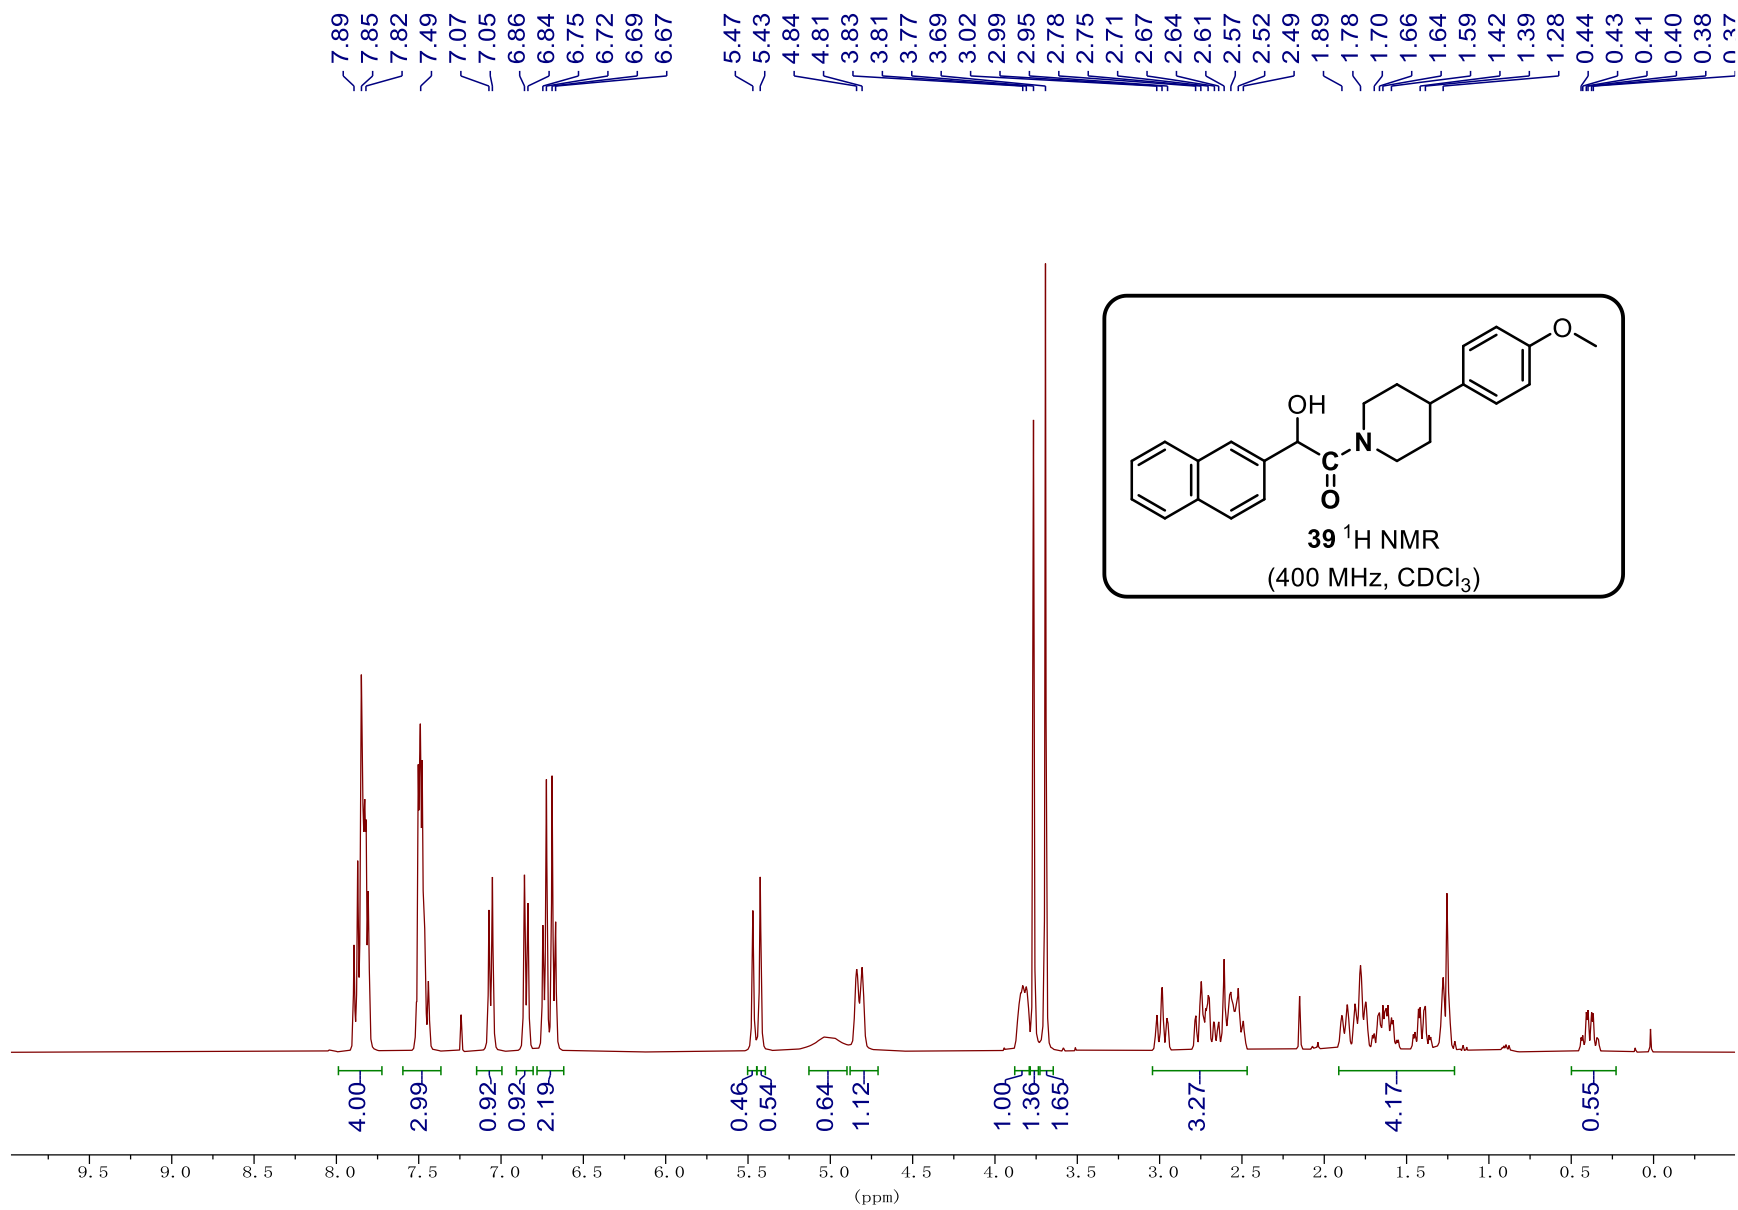

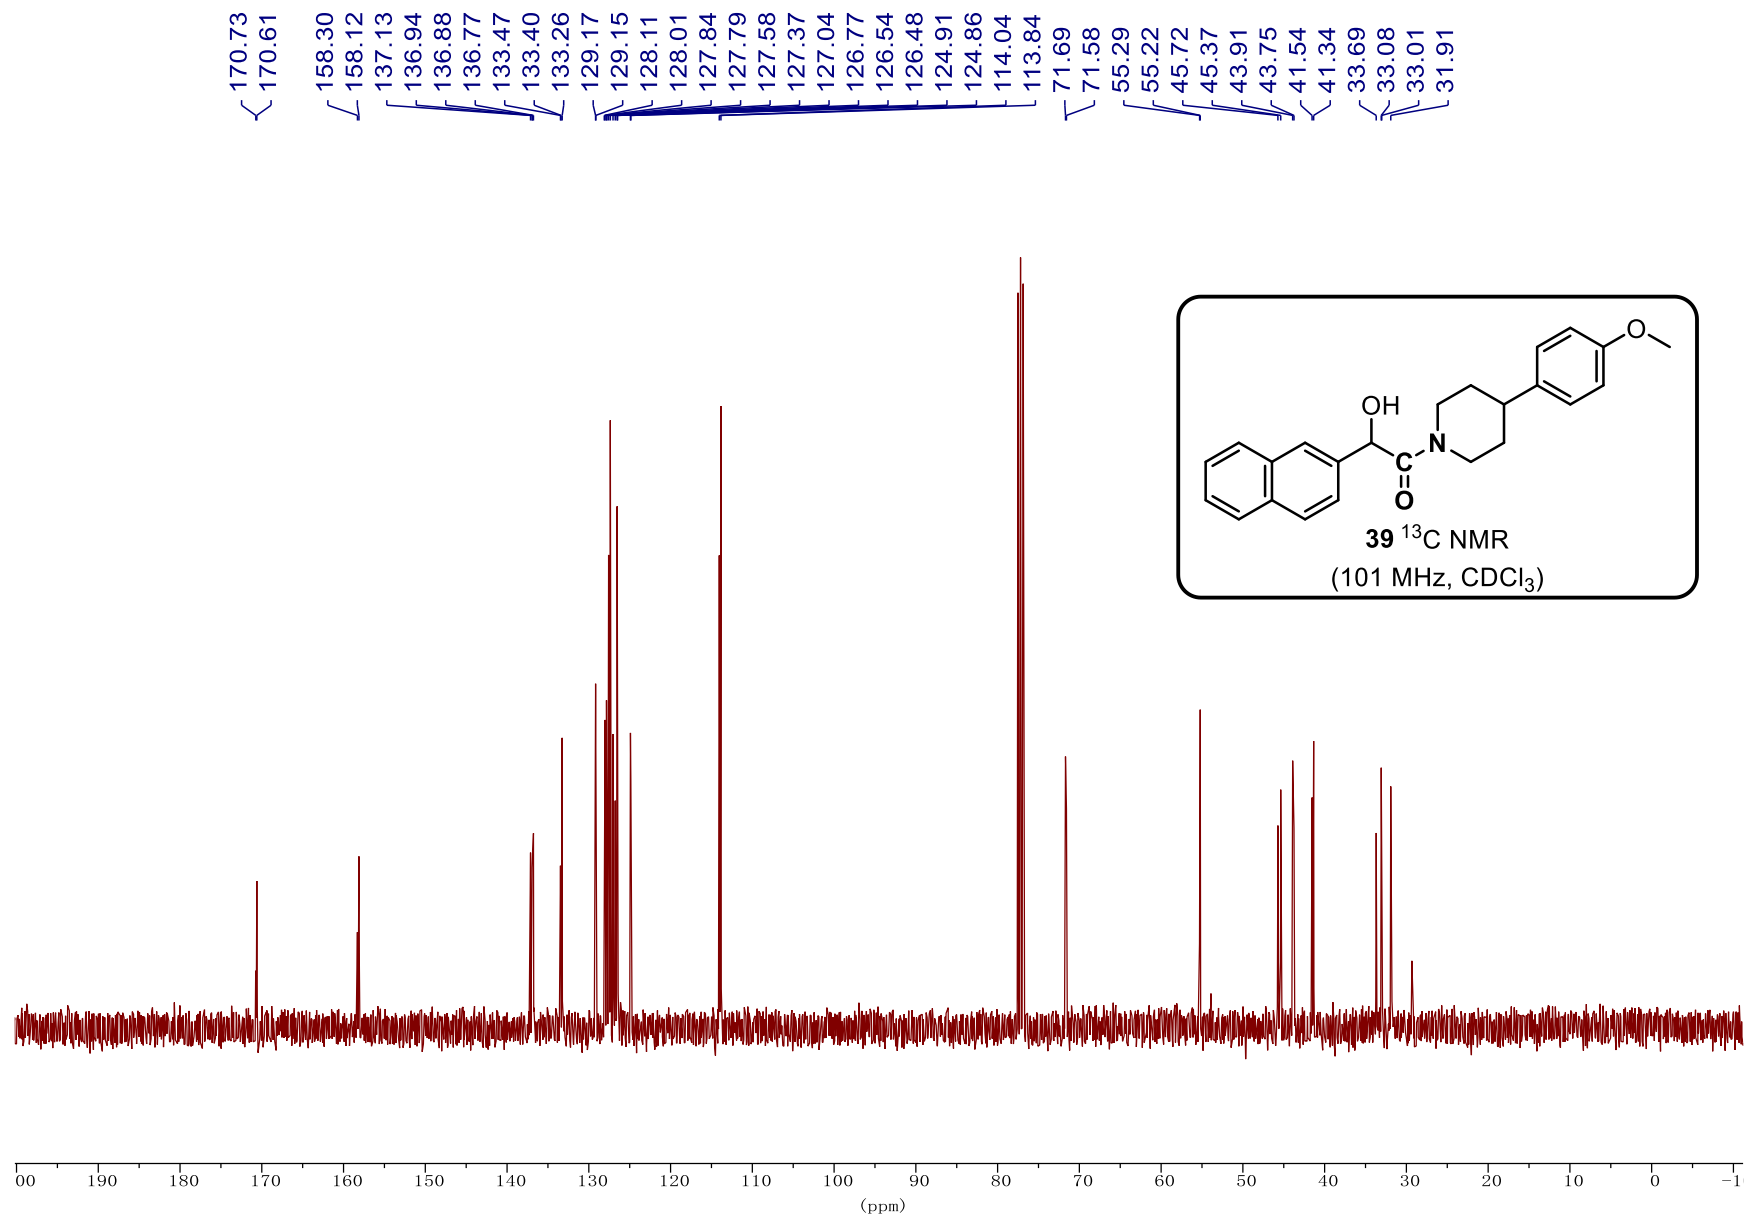

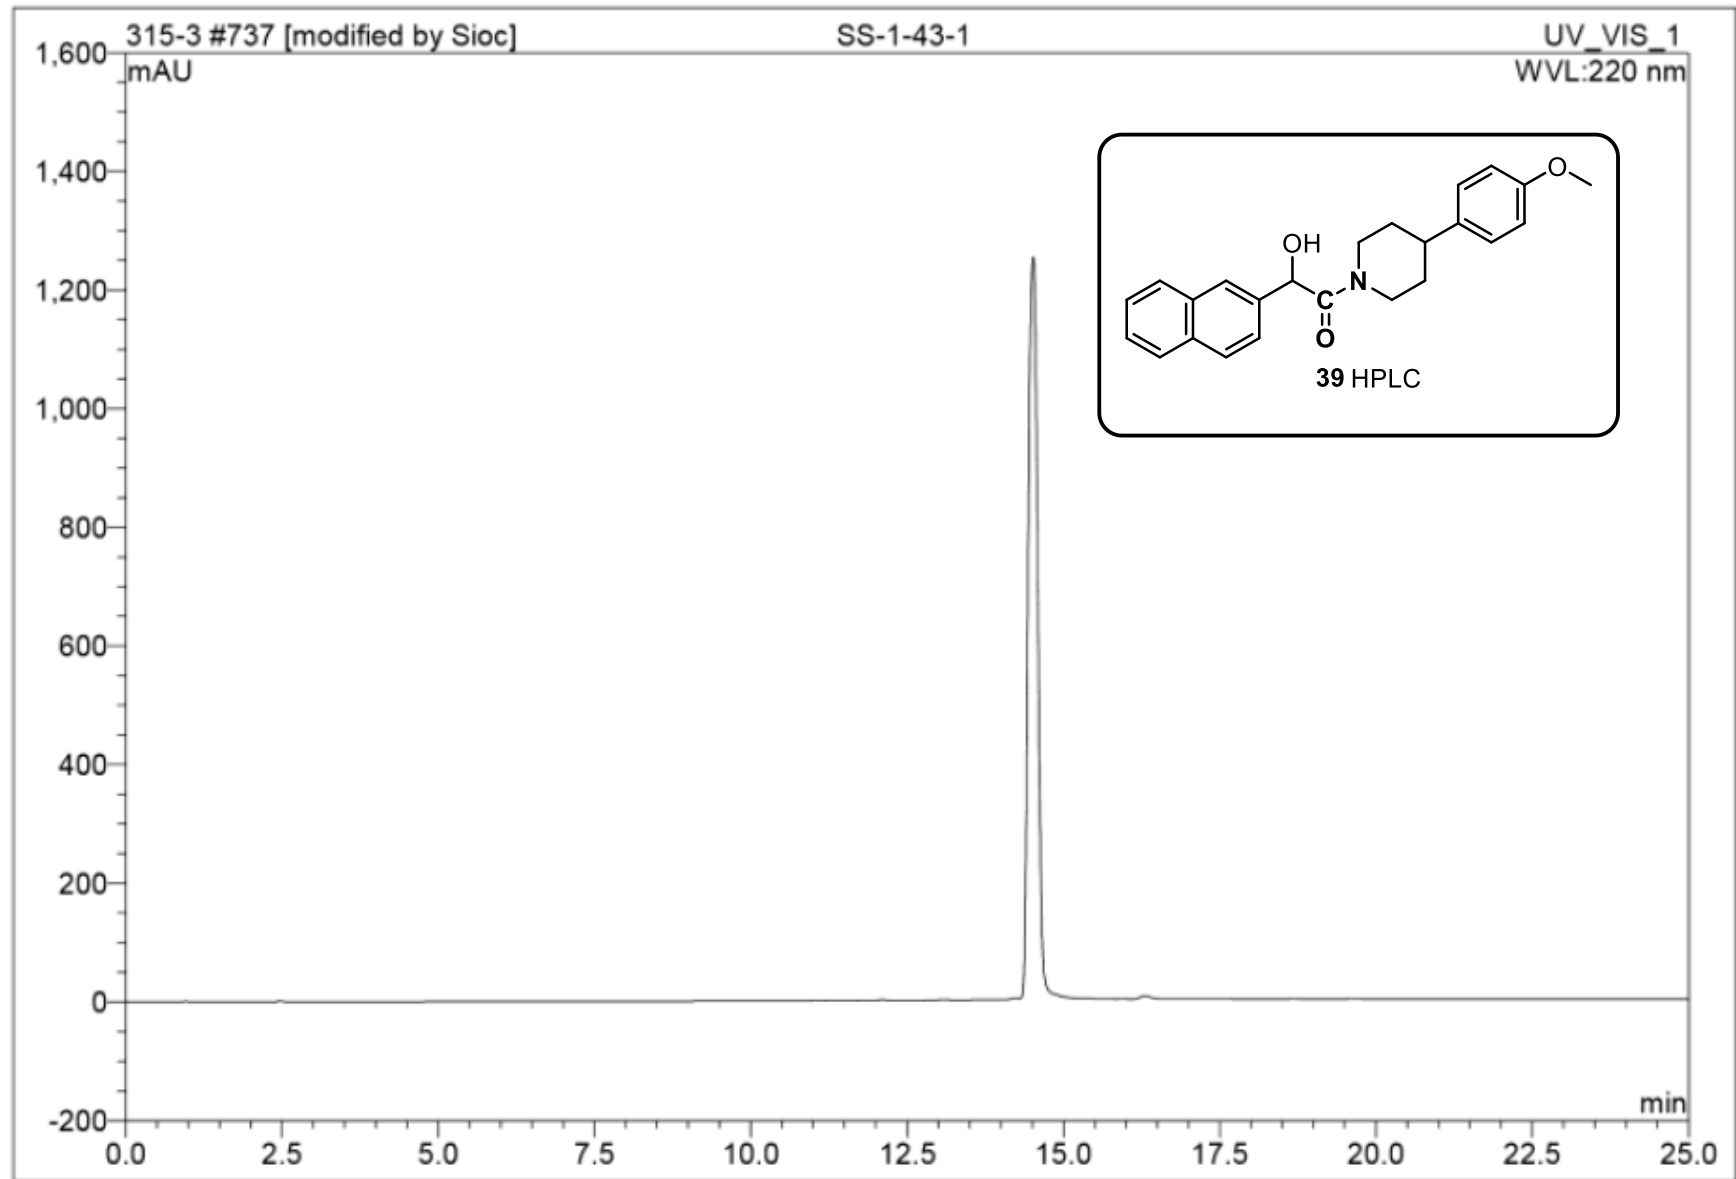

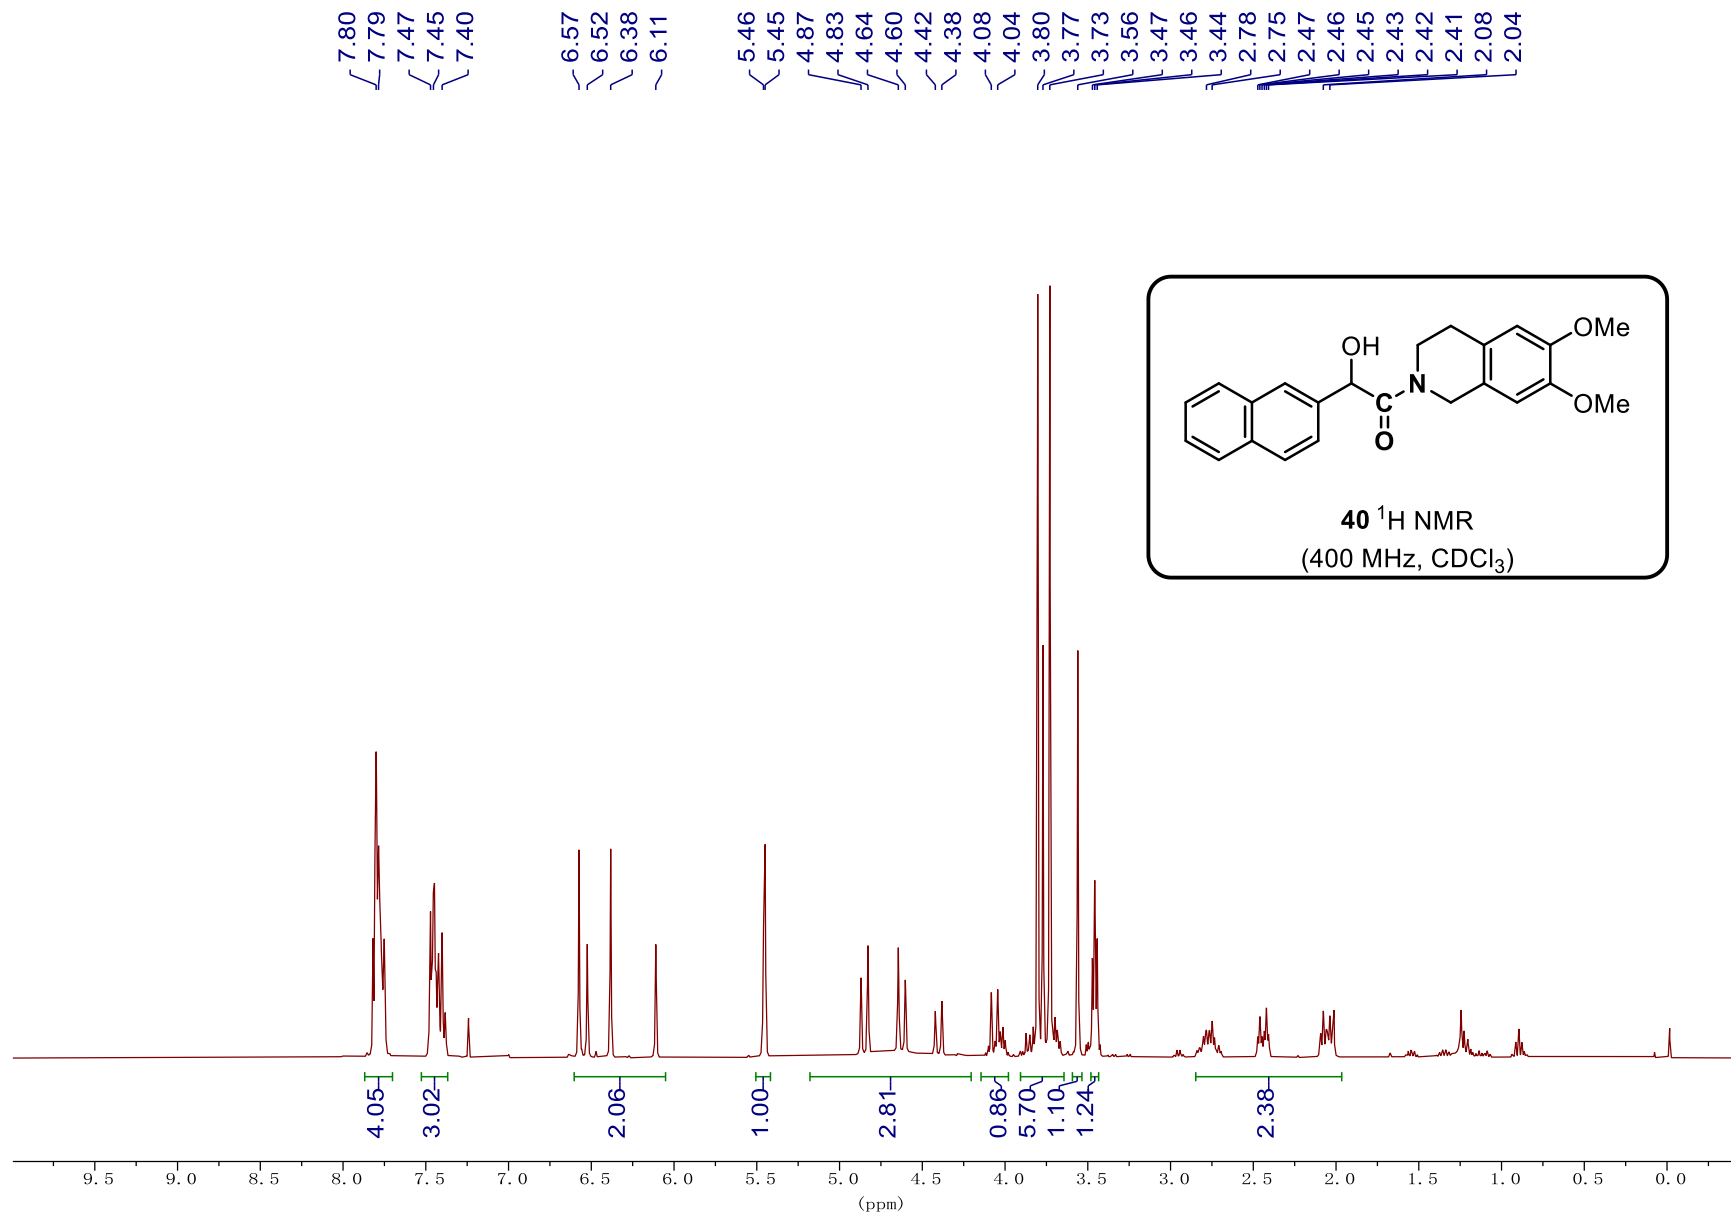

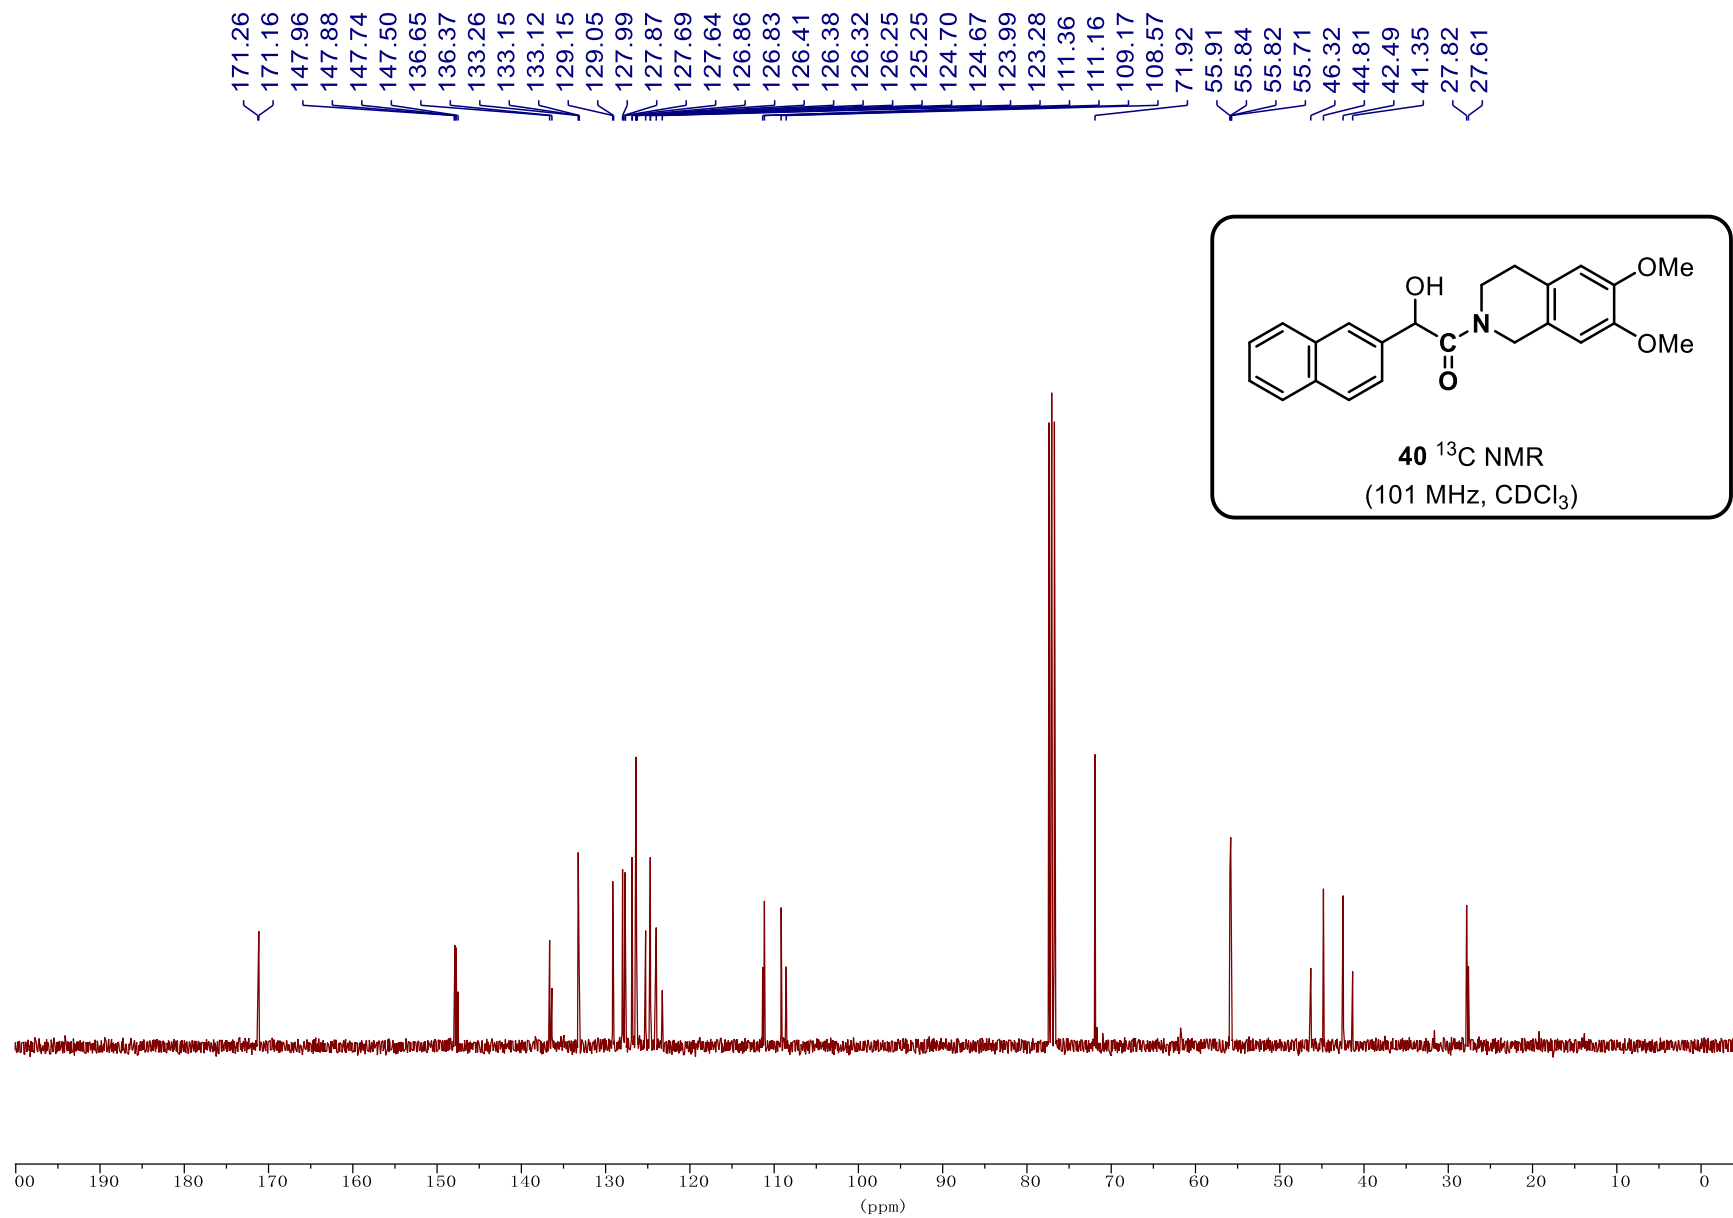



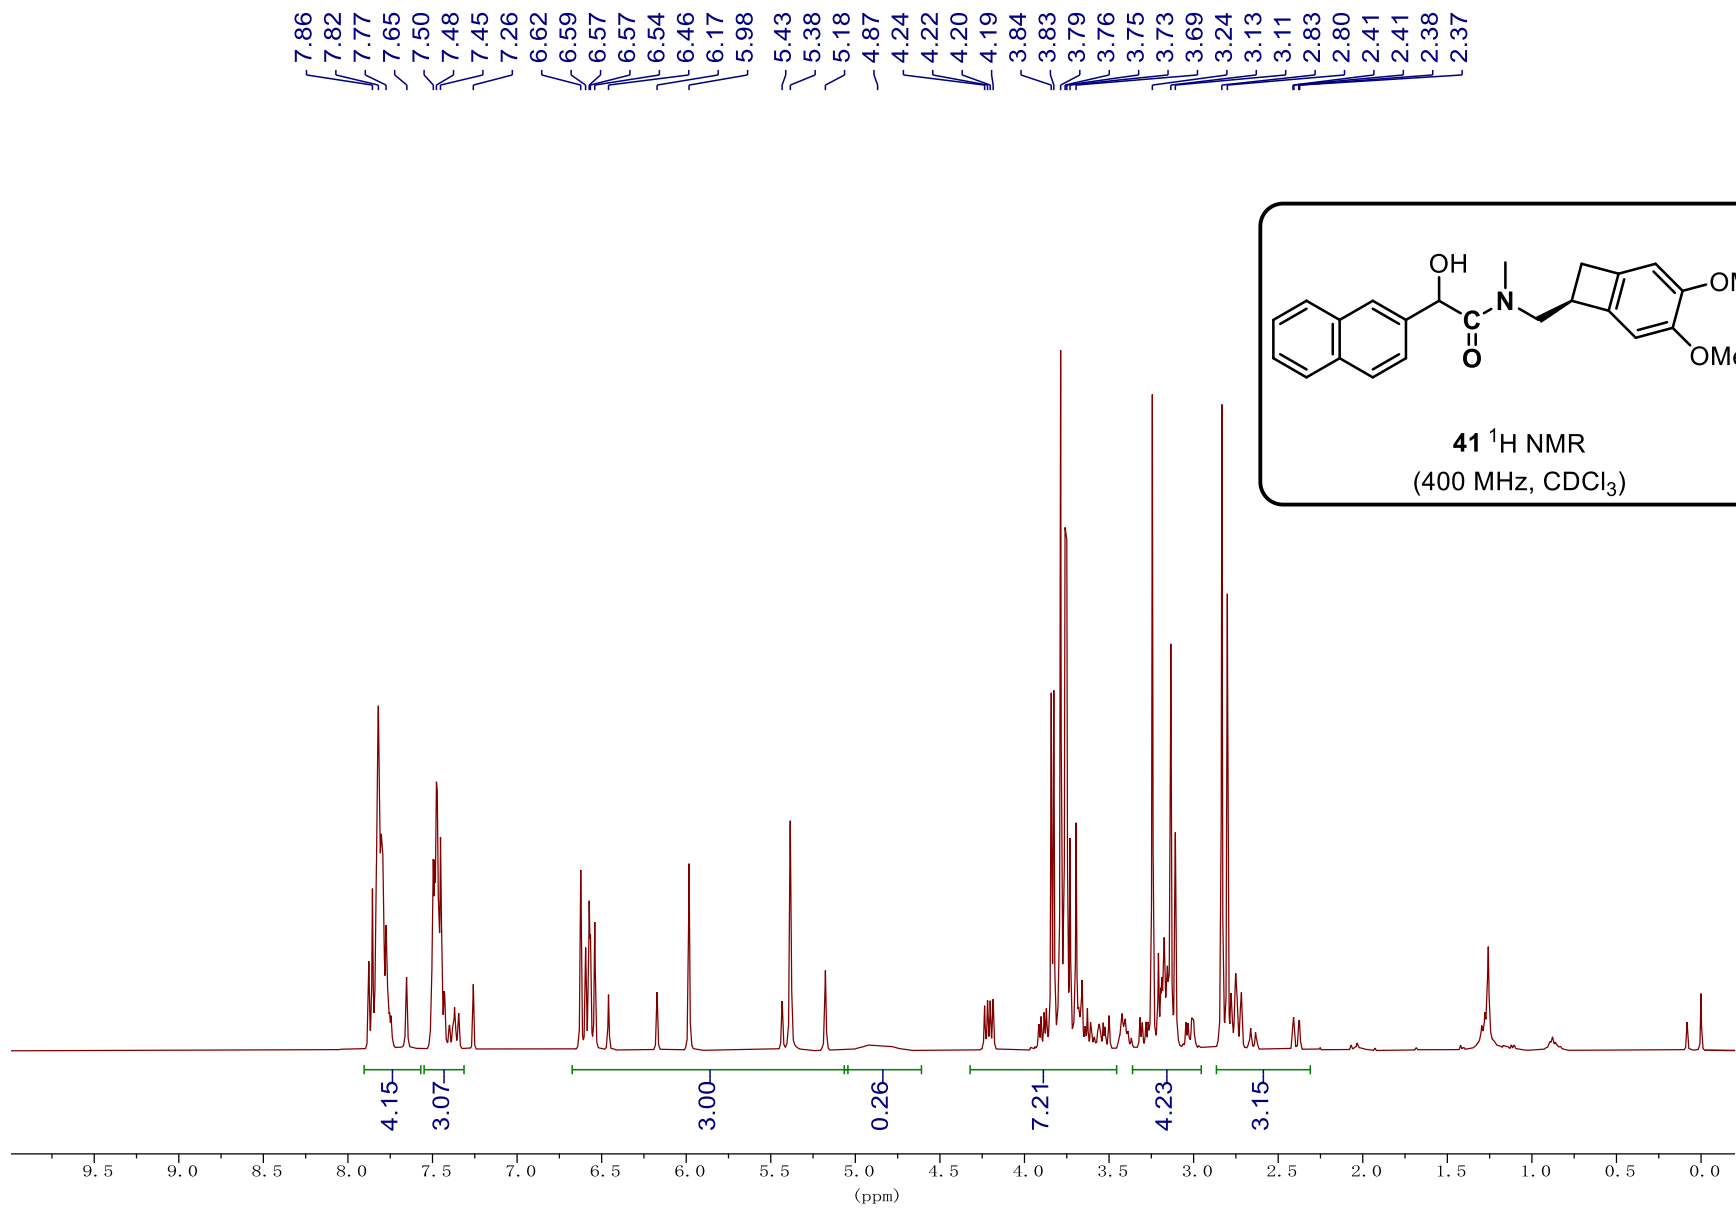

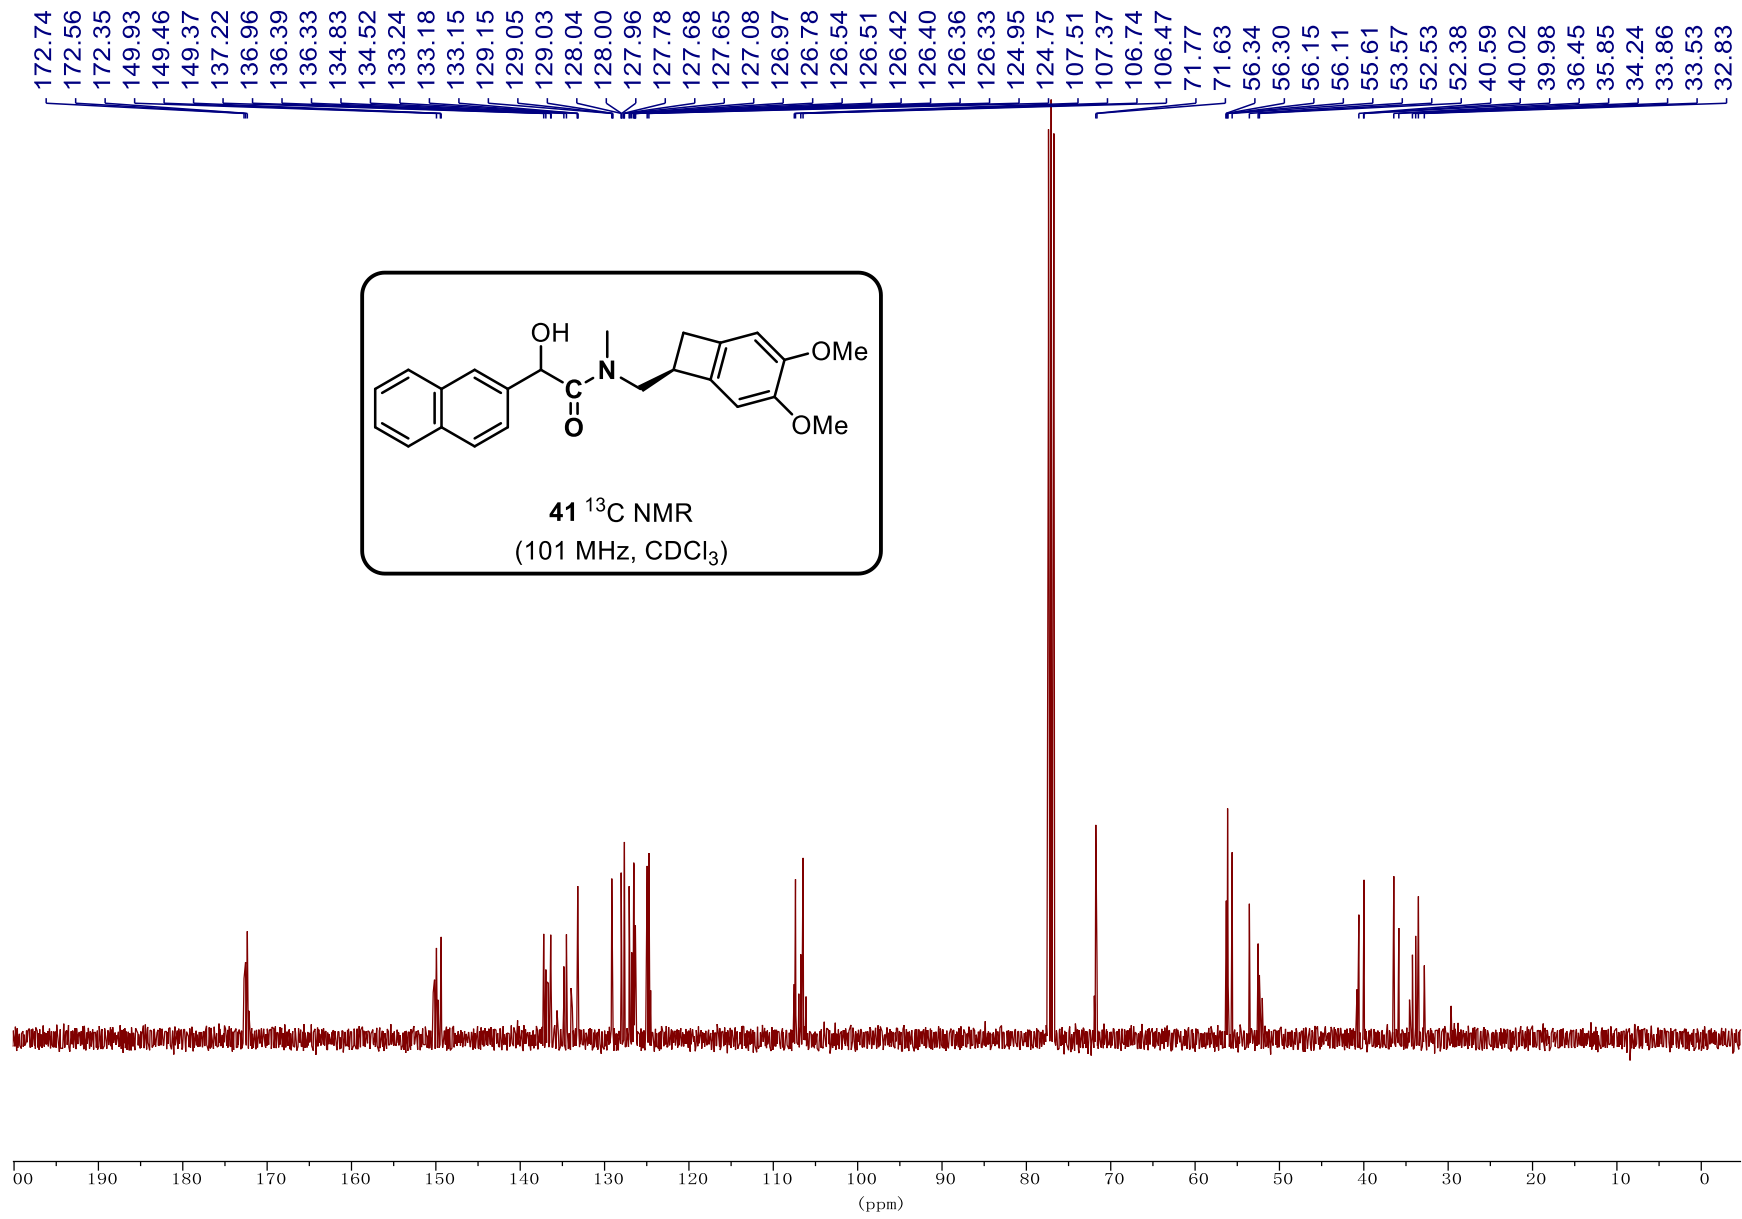

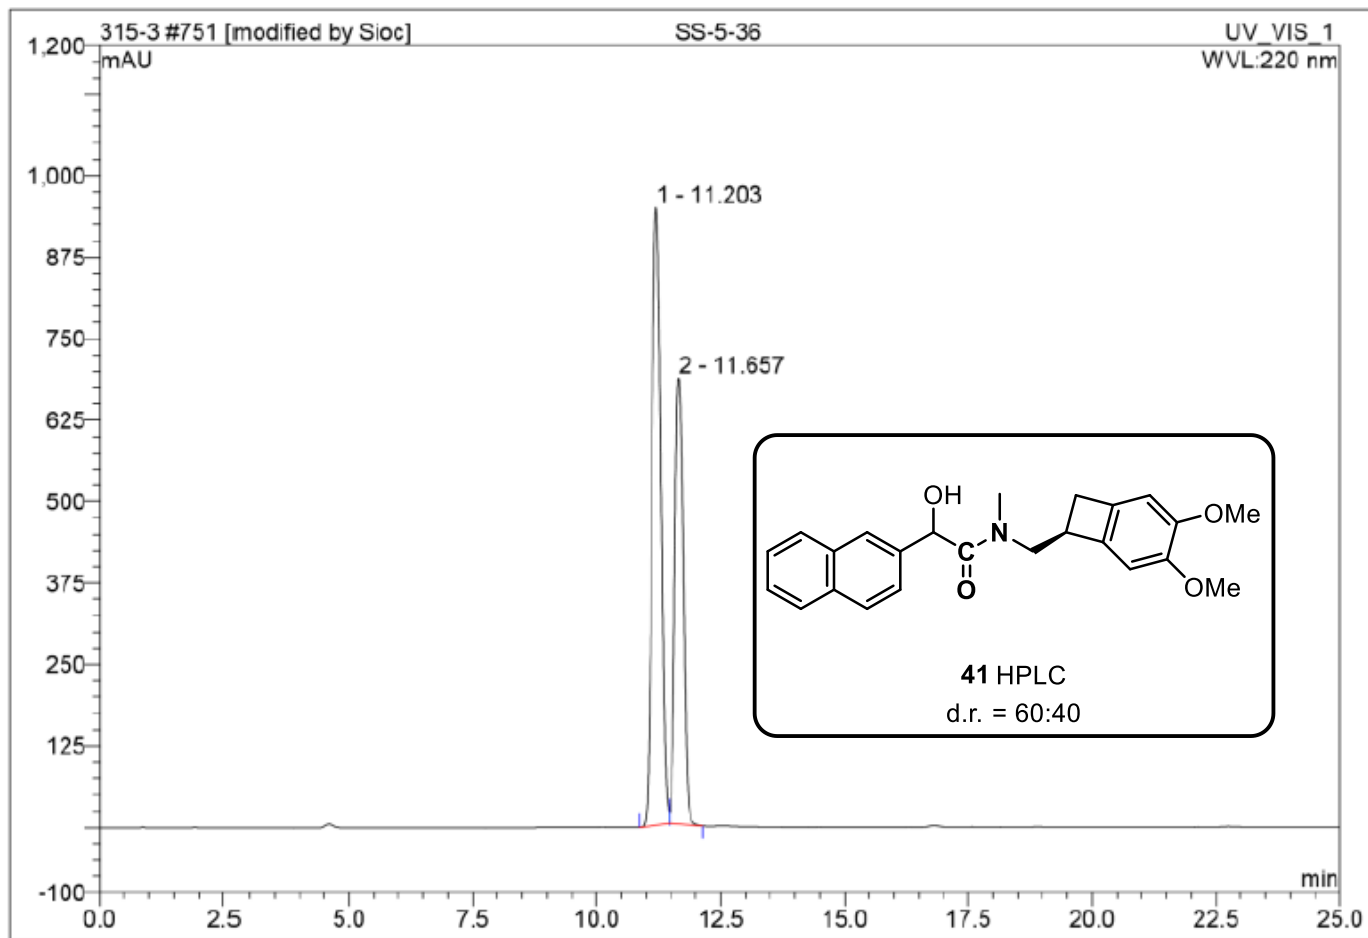

| No.           | Ret.Time<br>min | Peak Name | Height<br>mAU | Area<br>mAU*min | Rel.Area<br>% | Amount | Type |
|---------------|-----------------|-----------|---------------|-----------------|---------------|--------|------|
| 1             | 11.20           | n.a.      | 947.205       | 196.962         | 60.05         | n.a.   | BM * |
| 2             | 11.66           | n.a.      | 683.902       | 131.042         | 39.95         | n.a.   | MB*  |
| <b>Total:</b> |                 |           | 1631.107      | 328.004         | 100.00        | 0.000  |      |

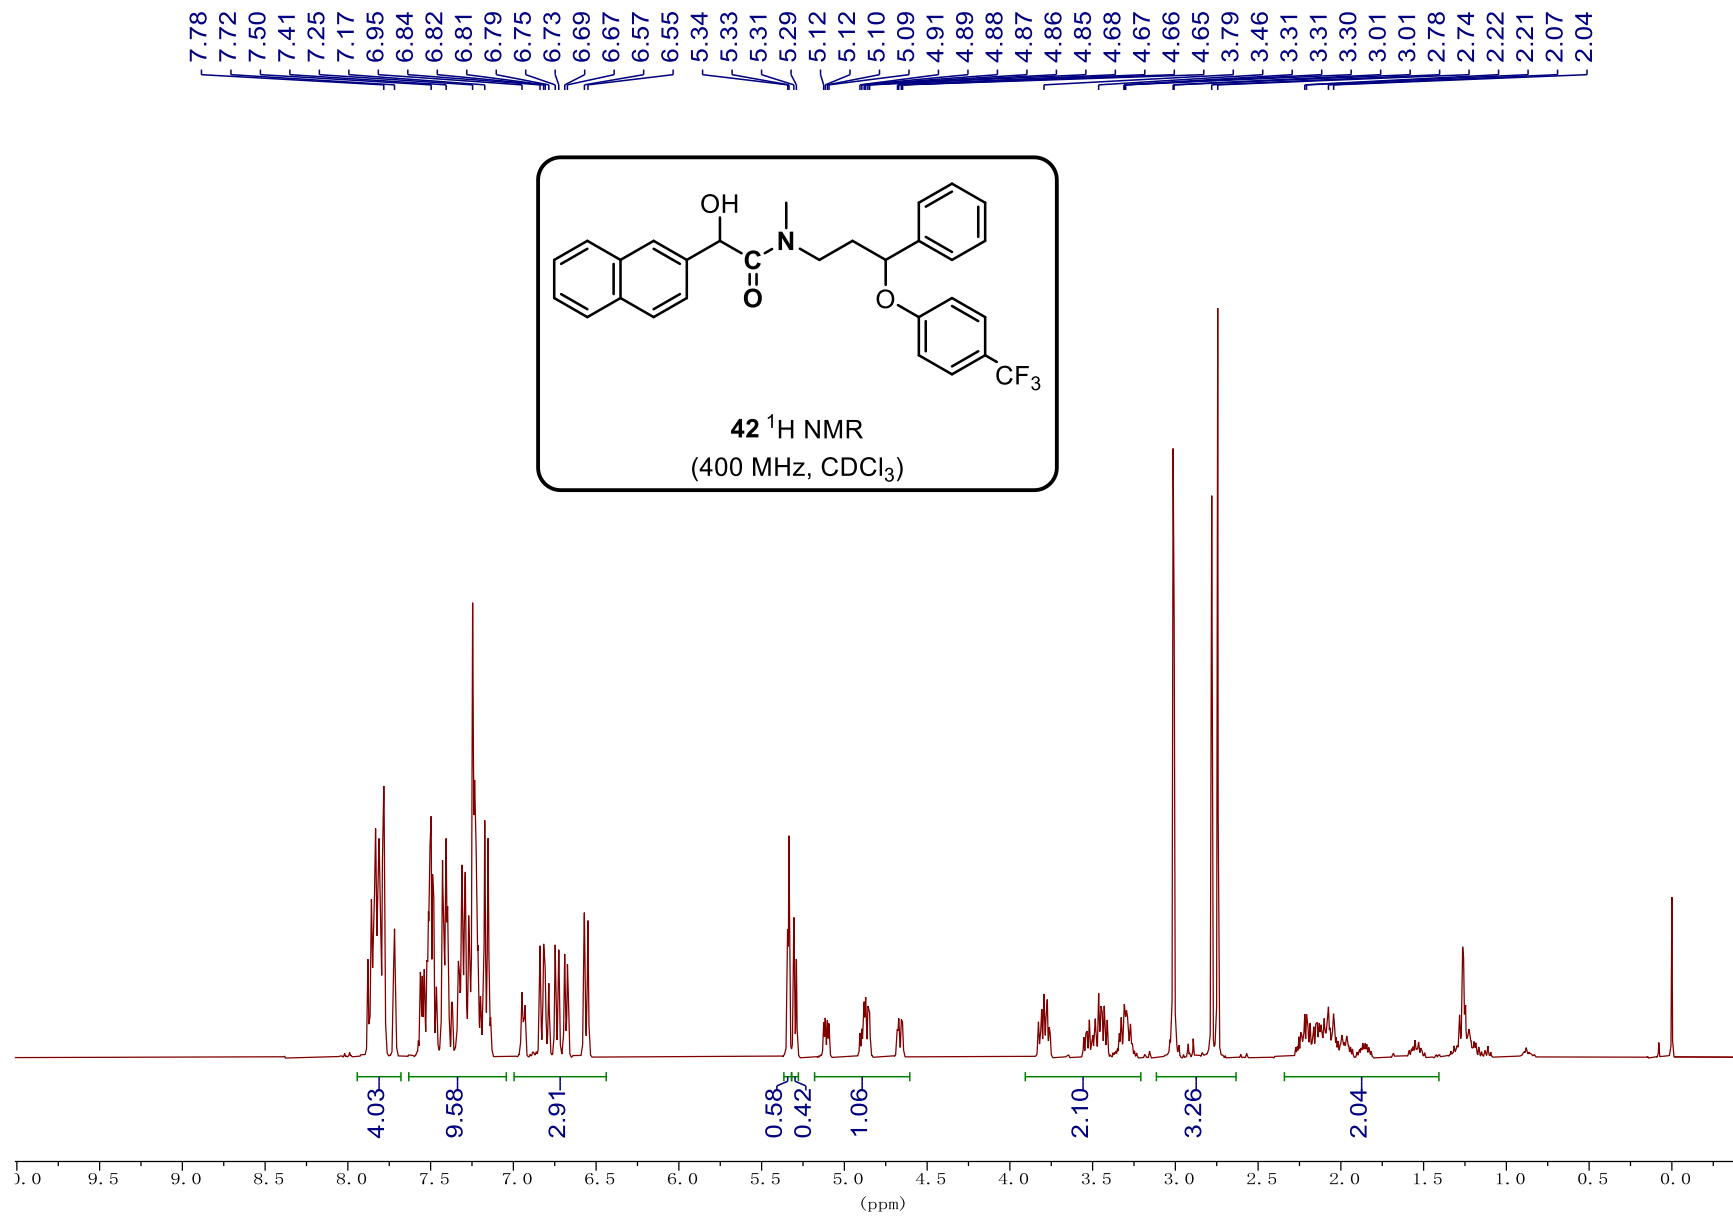

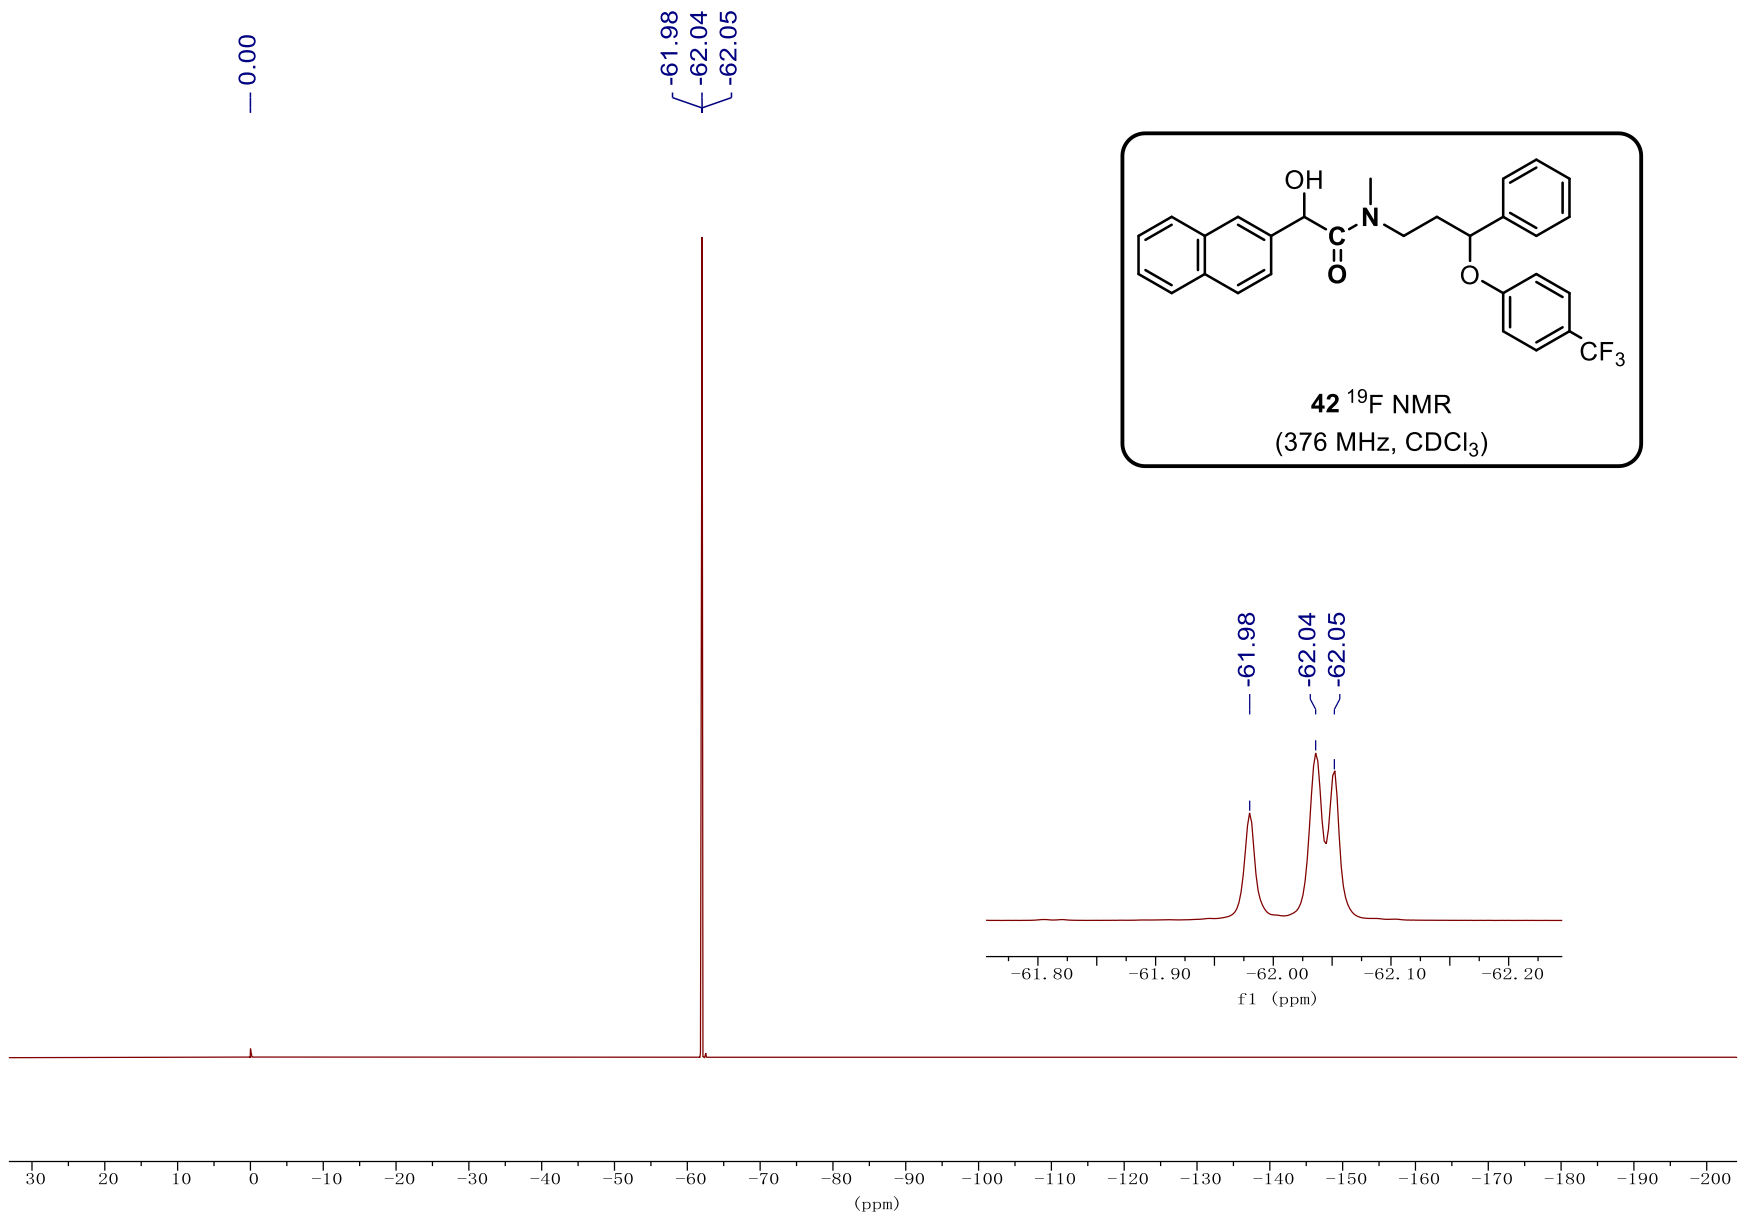

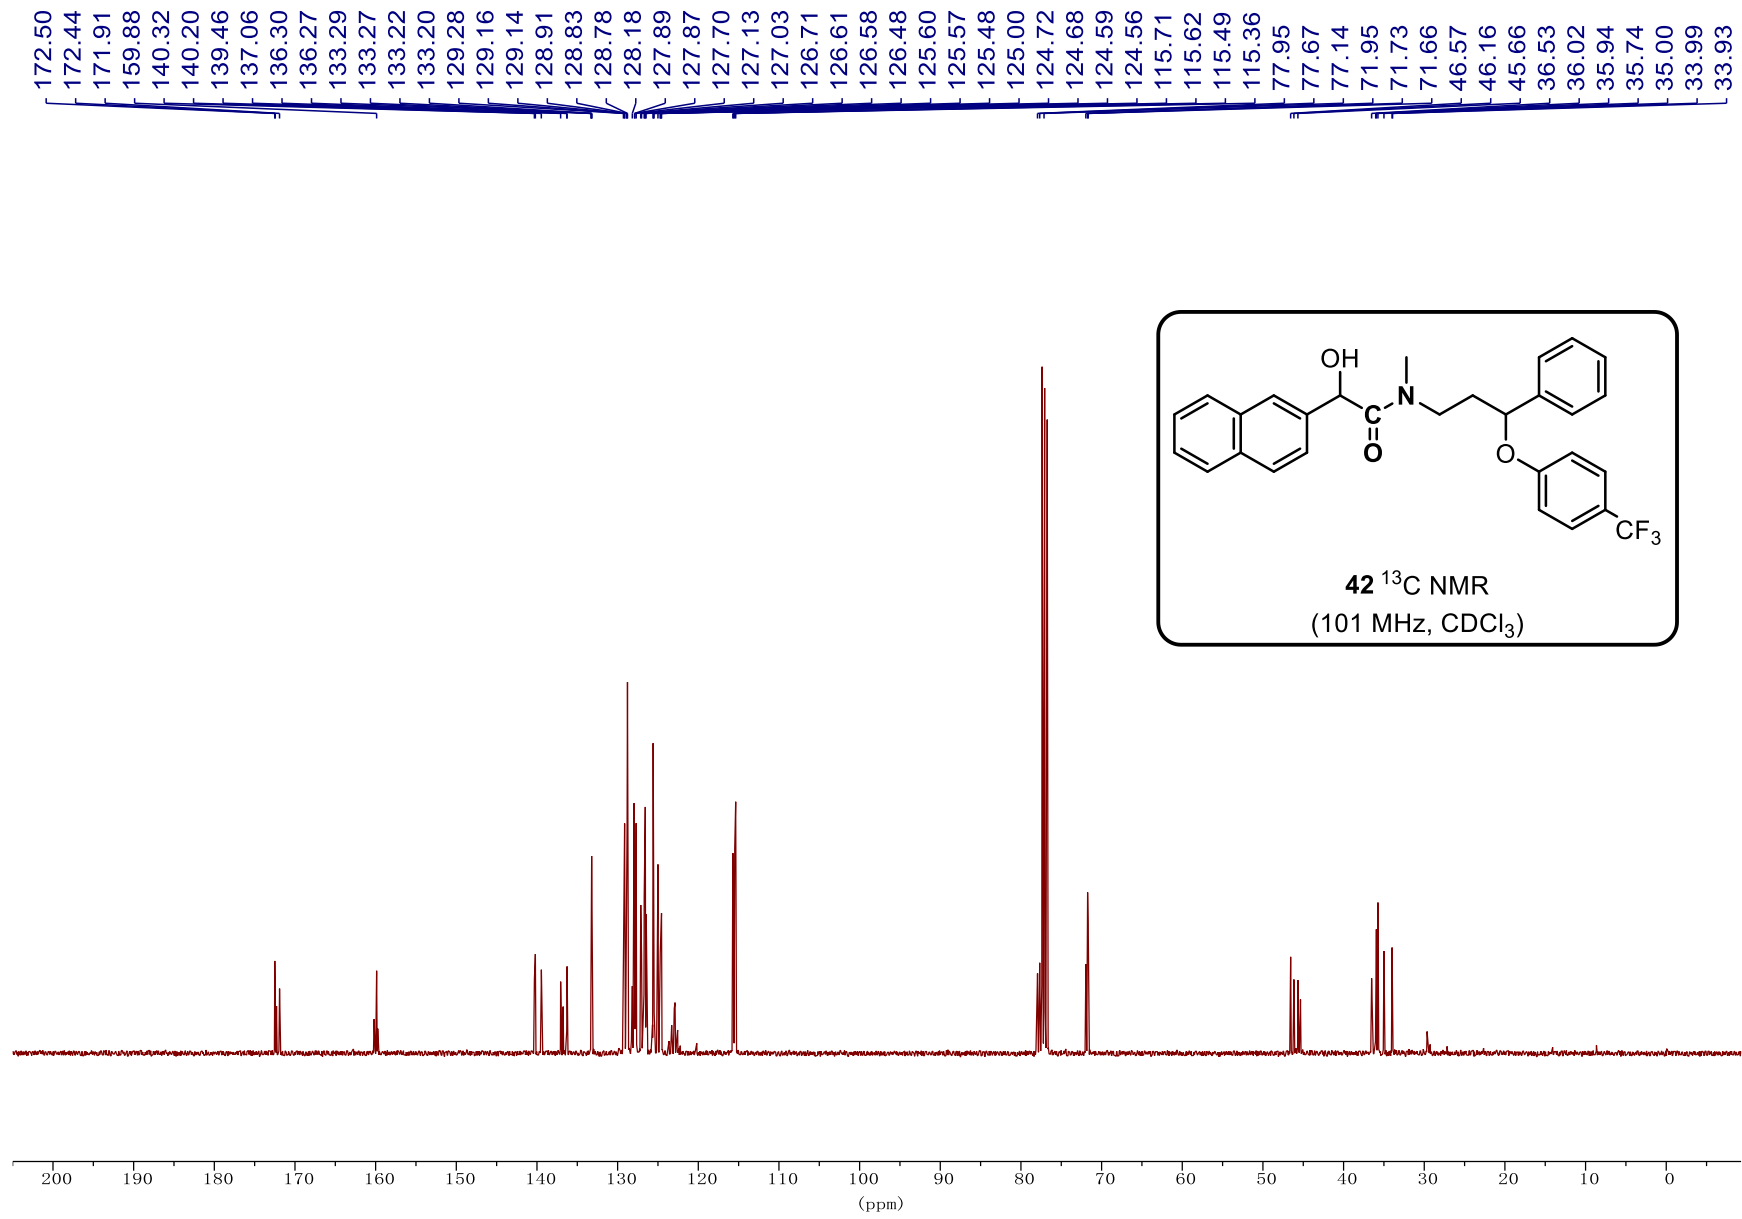

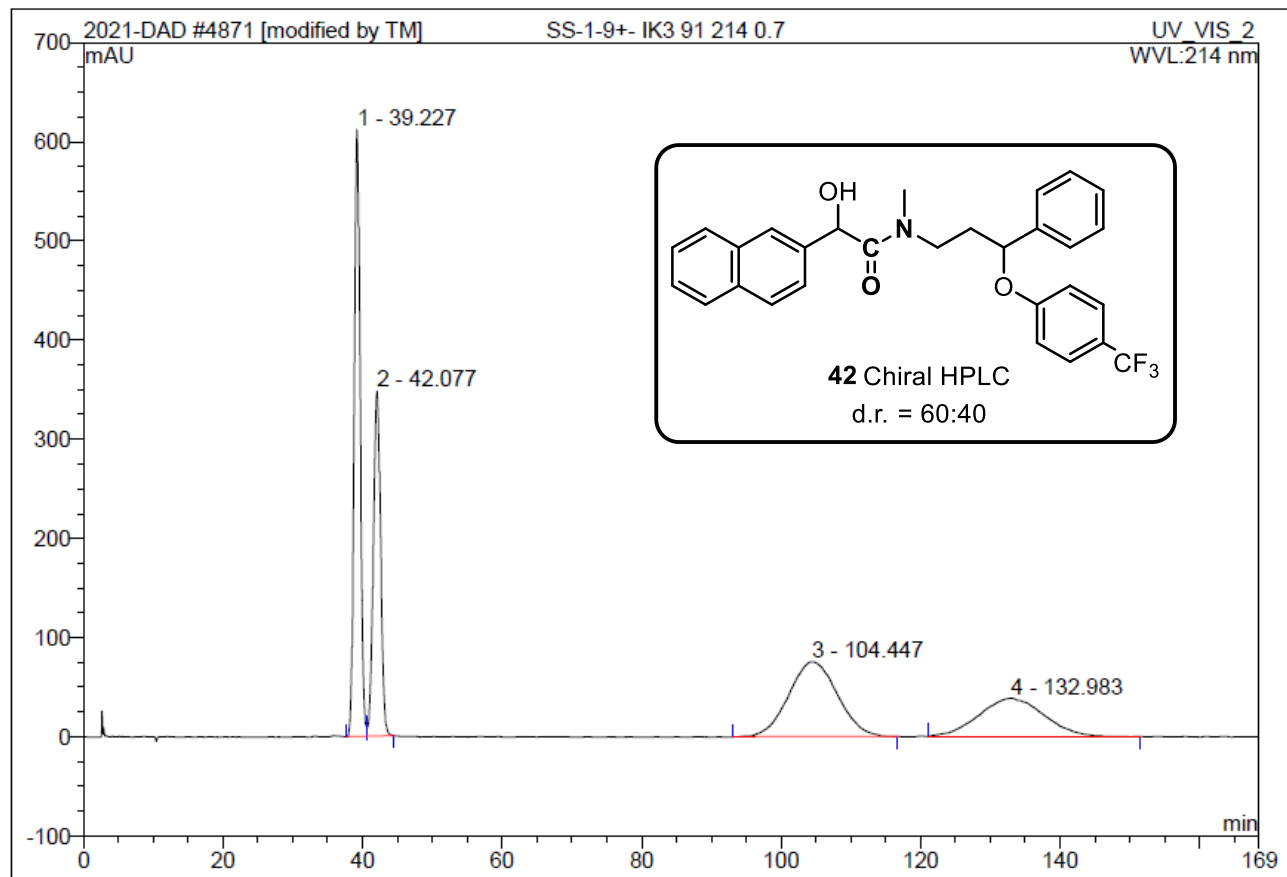

| No.           | Ret.Time<br>min | Peak Name | Height<br>mAU | Area<br>mAU*min | Rel.Area<br>% | Amount | Type |
|---------------|-----------------|-----------|---------------|-----------------|---------------|--------|------|
| 1             | 39.23           | n.a.      | 612.229       | 608.551         | 29.70         | n.a.   | BM   |
| 2             | 42.08           | n.a.      | 347.693       | 421.839         | 20.59         | n.a.   | MB   |
| 3             | 104.45          | n.a.      | 75.602        | 611.608         | 29.85         | n.a.   | BMB* |
| 4             | 132.98          | n.a.      | 38.256        | 406.687         | 19.85         | n.a.   | BMB* |
| <b>Total:</b> |                 |           | 1073.780      | 2048.685        | 100.00        | 0.000  |      |

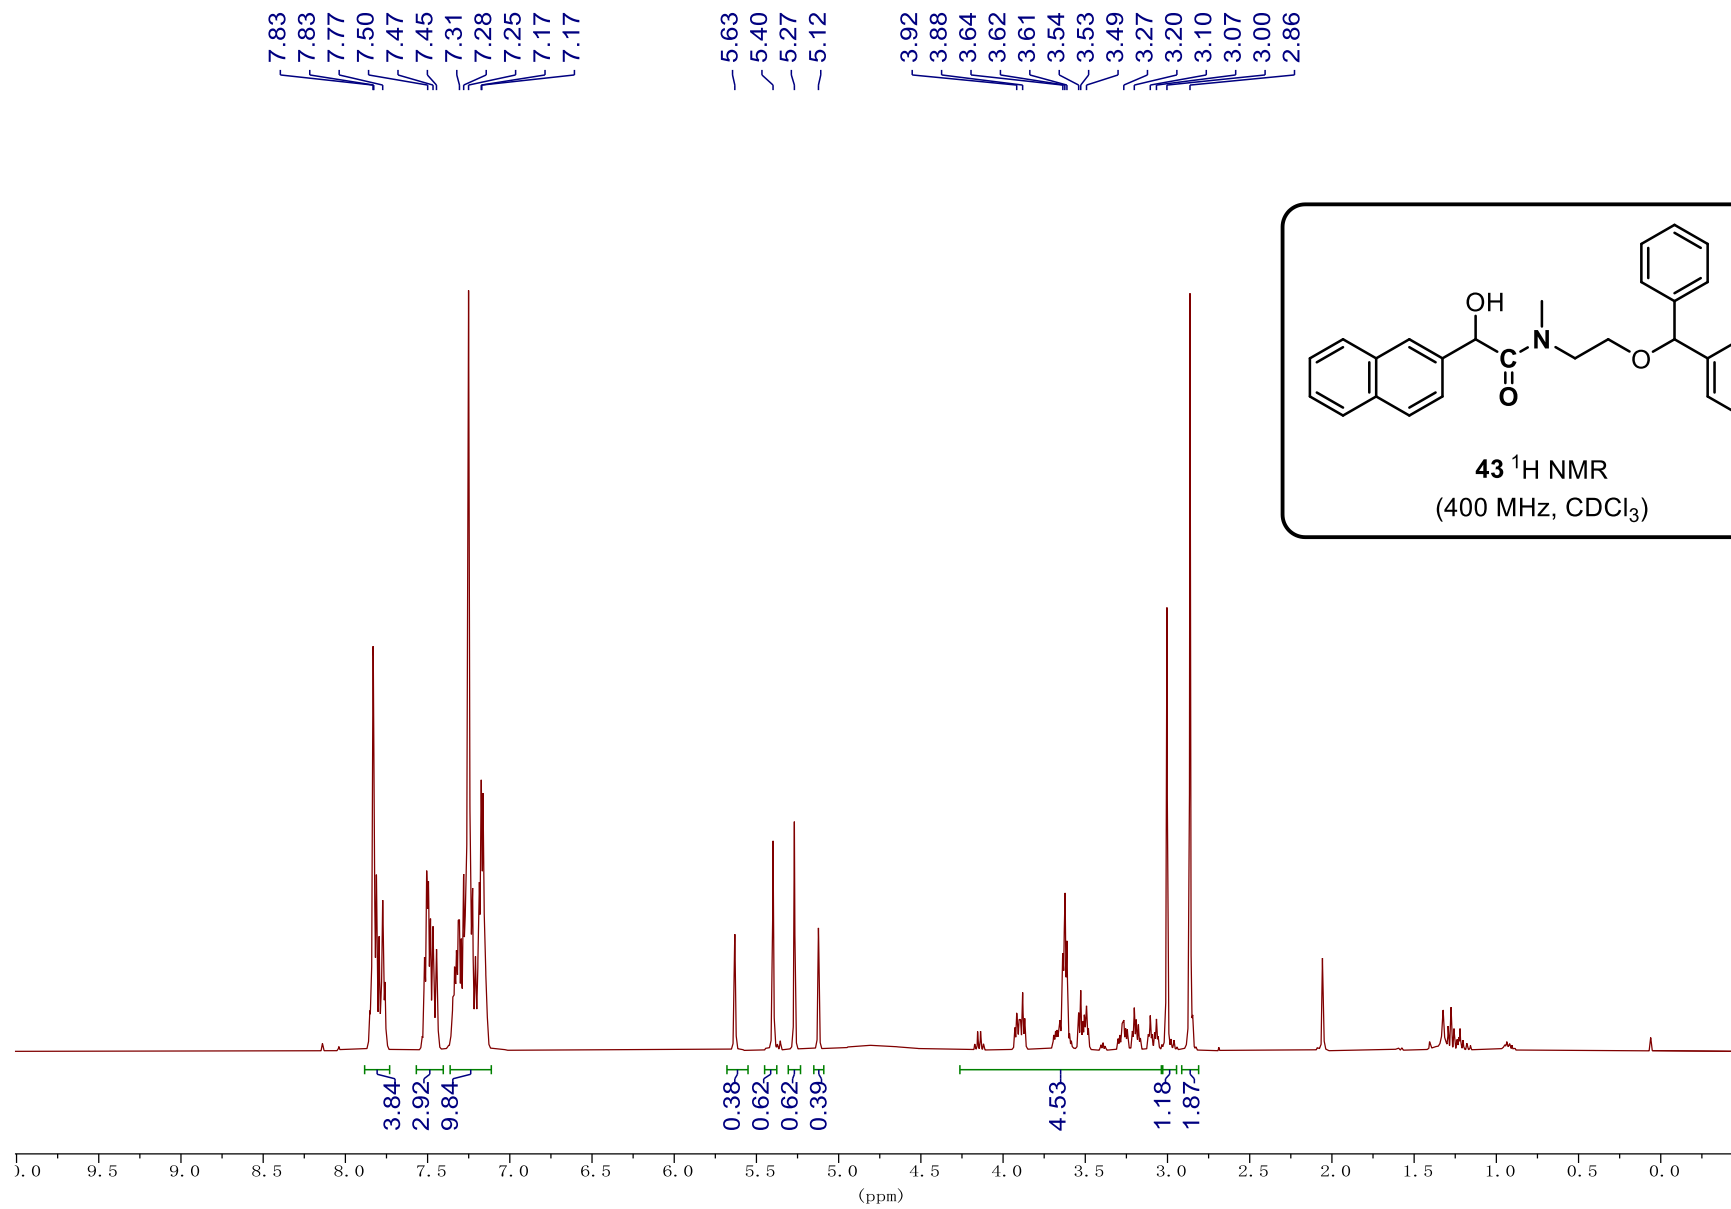



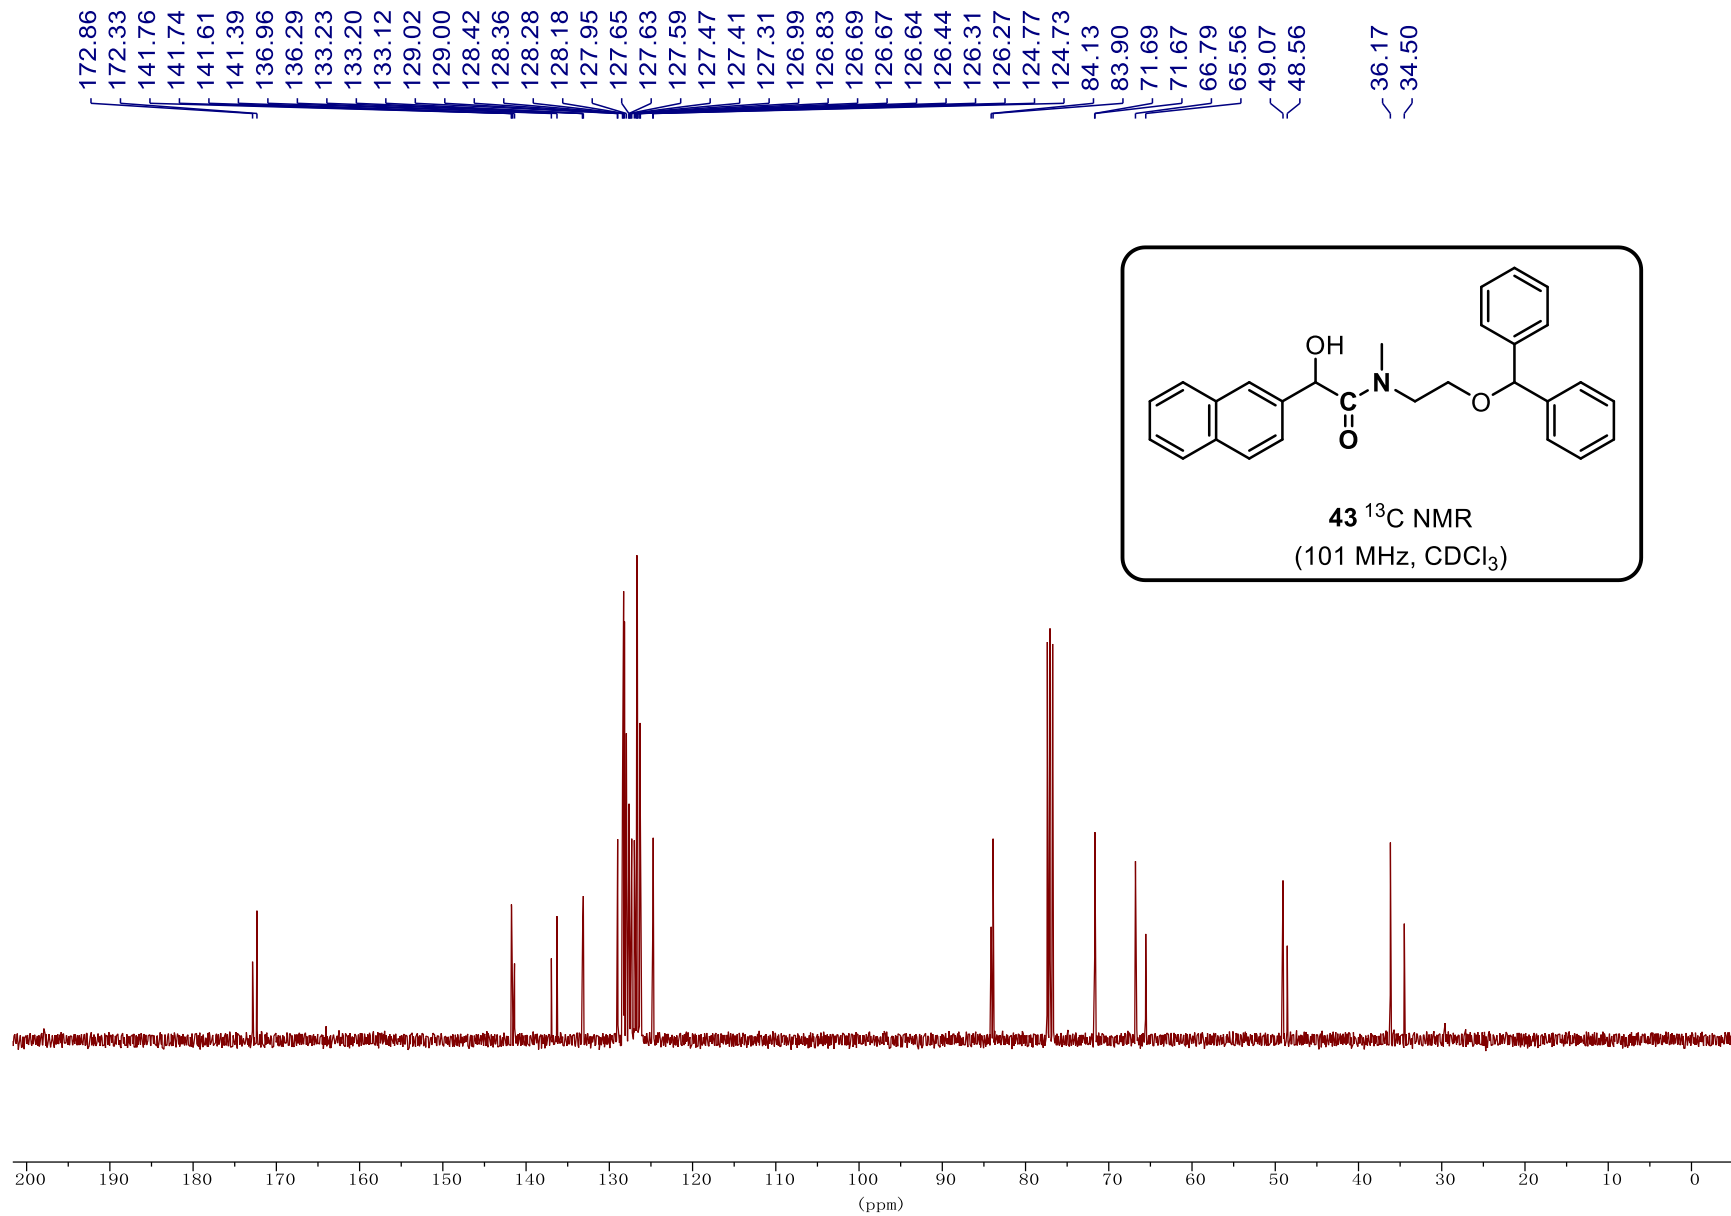

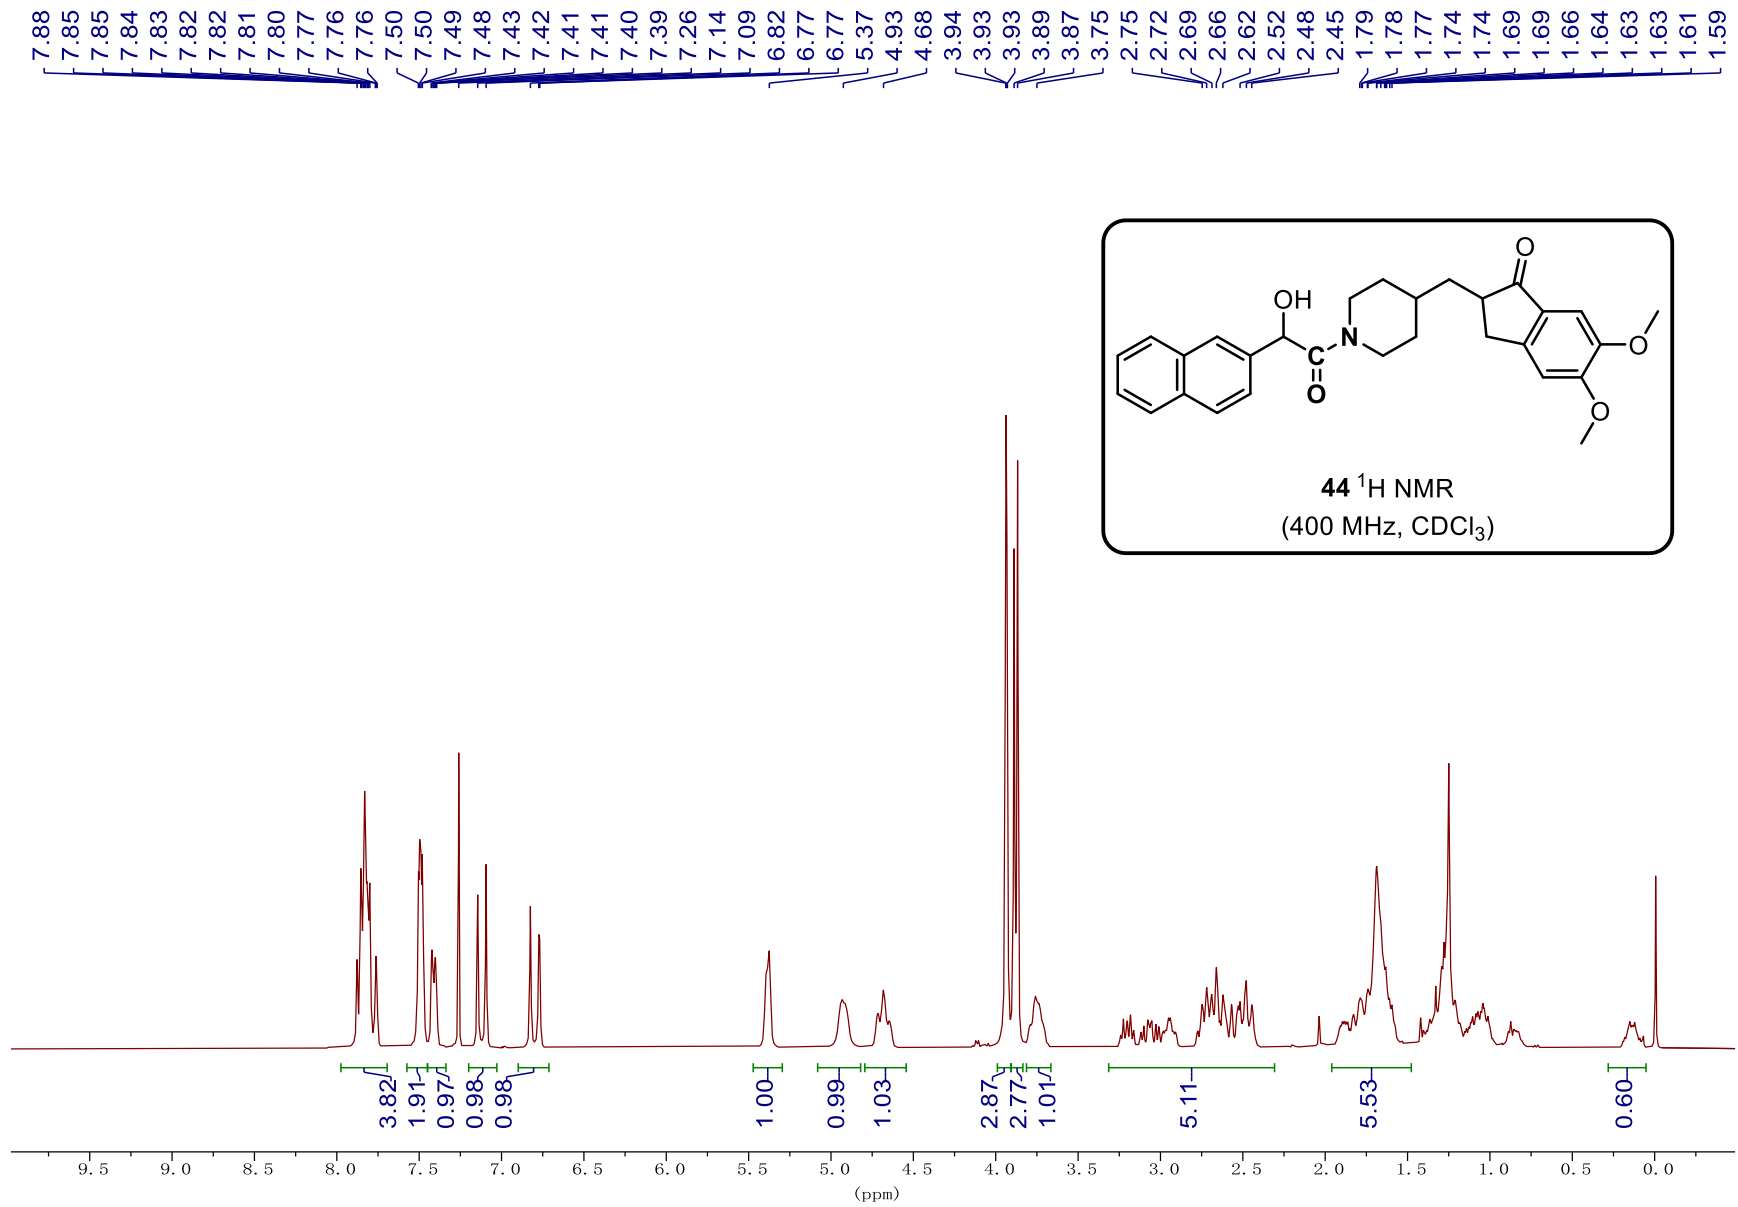

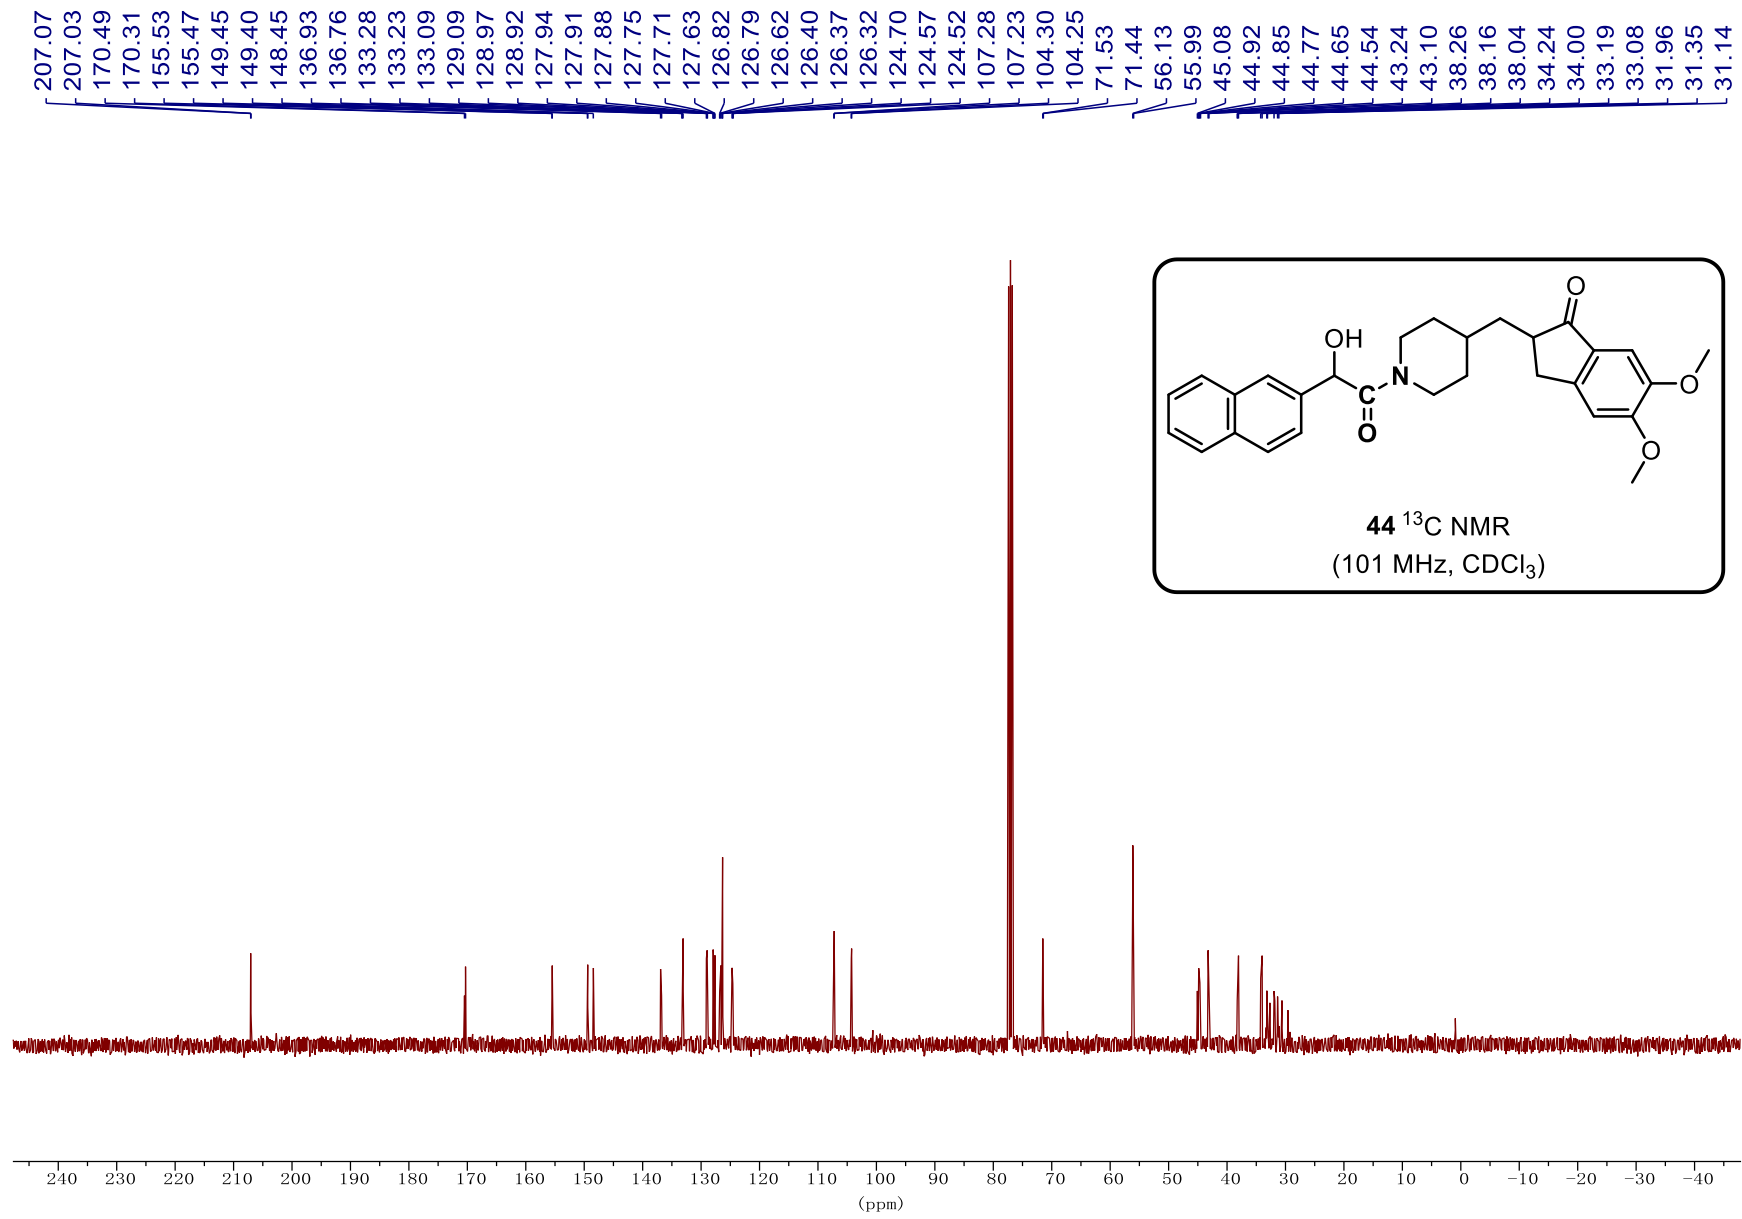

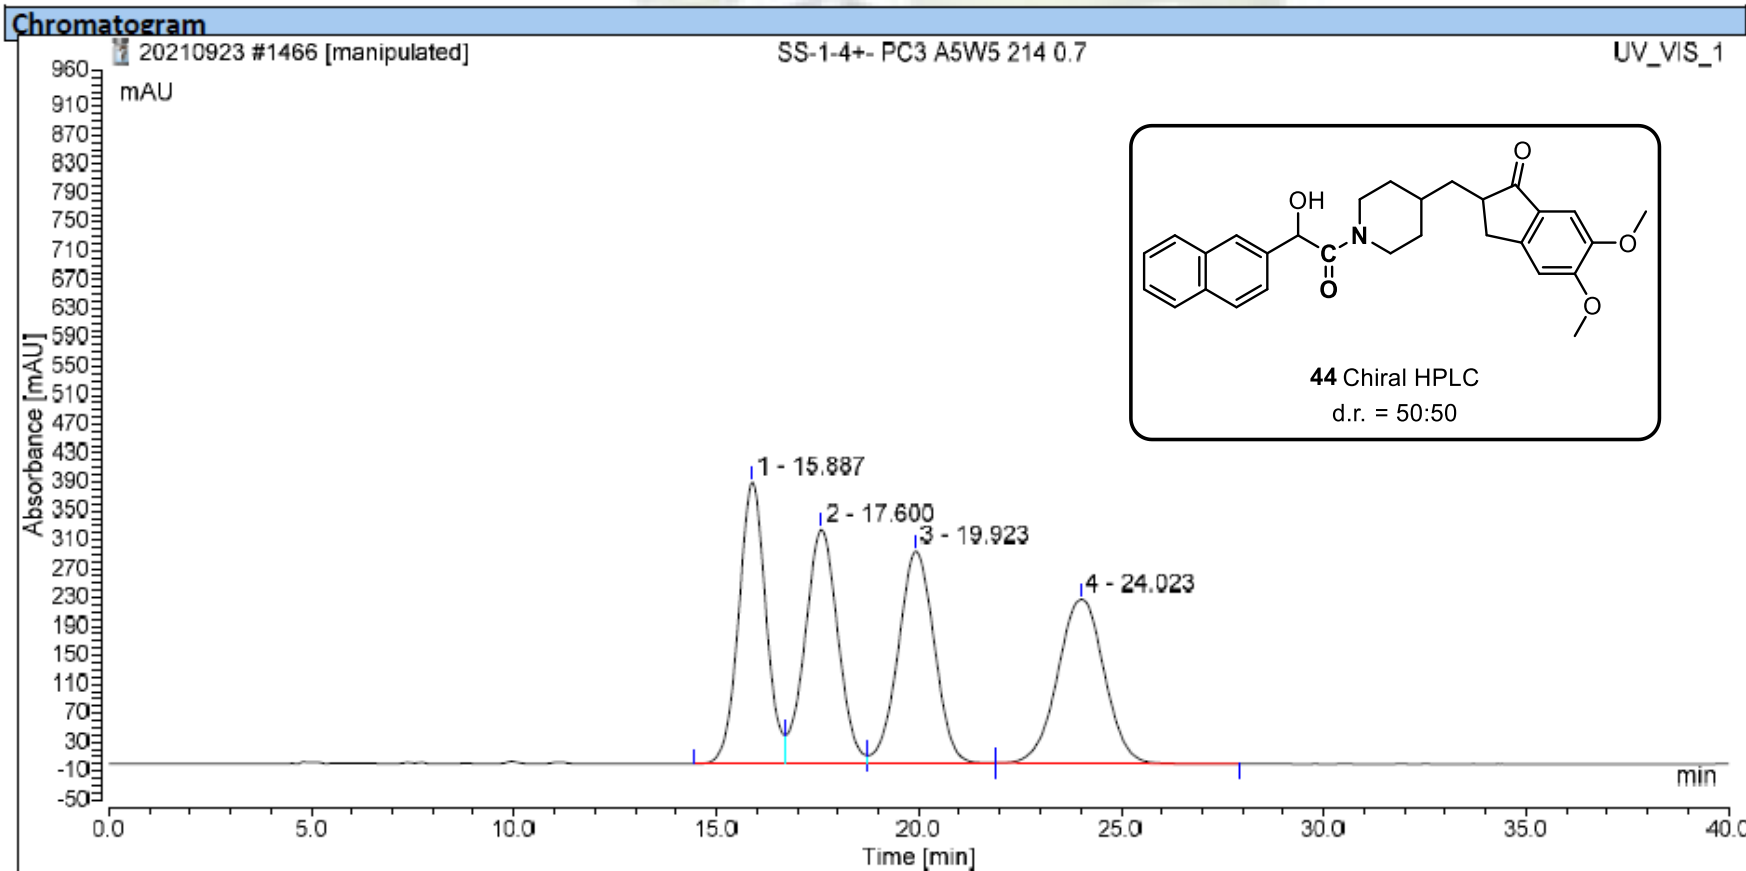

| Integration Results |                       |                 |                 |                    |                 |                |      |             |
|---------------------|-----------------------|-----------------|-----------------|--------------------|-----------------|----------------|------|-------------|
| No.                 | Retention Time<br>min | Area<br>mAU*min | Height<br>mAU   | Relative Area<br>% | Resolution (EP) | Asymmetry (EP) | K'   | Plates (EP) |
| n.a.                | 15.887                | 302.4990        | 390.1664        | 24.901             | 1.28            | n.a.           | n.a. | 2762        |
| n.a.                | 17.600                | 304.9780        | 324.5777        | 25.105             | 1.50            | n.a.           | n.a. | 2268        |
| n.a.                | 19.923                | 305.0374        | 294.7748        | 25.110             | 2.20            | 1.00           | n.a. | 2373        |
| n.a.                | 24.023                | 302.2736        | 227.0692        | 24.883             | n.a.            | 0.99           | n.a. | 2097        |
| <b>Total:</b>       |                       | <b>1214.788</b> | <b>1401.998</b> | <b>100.000</b>     |                 |                |      |             |

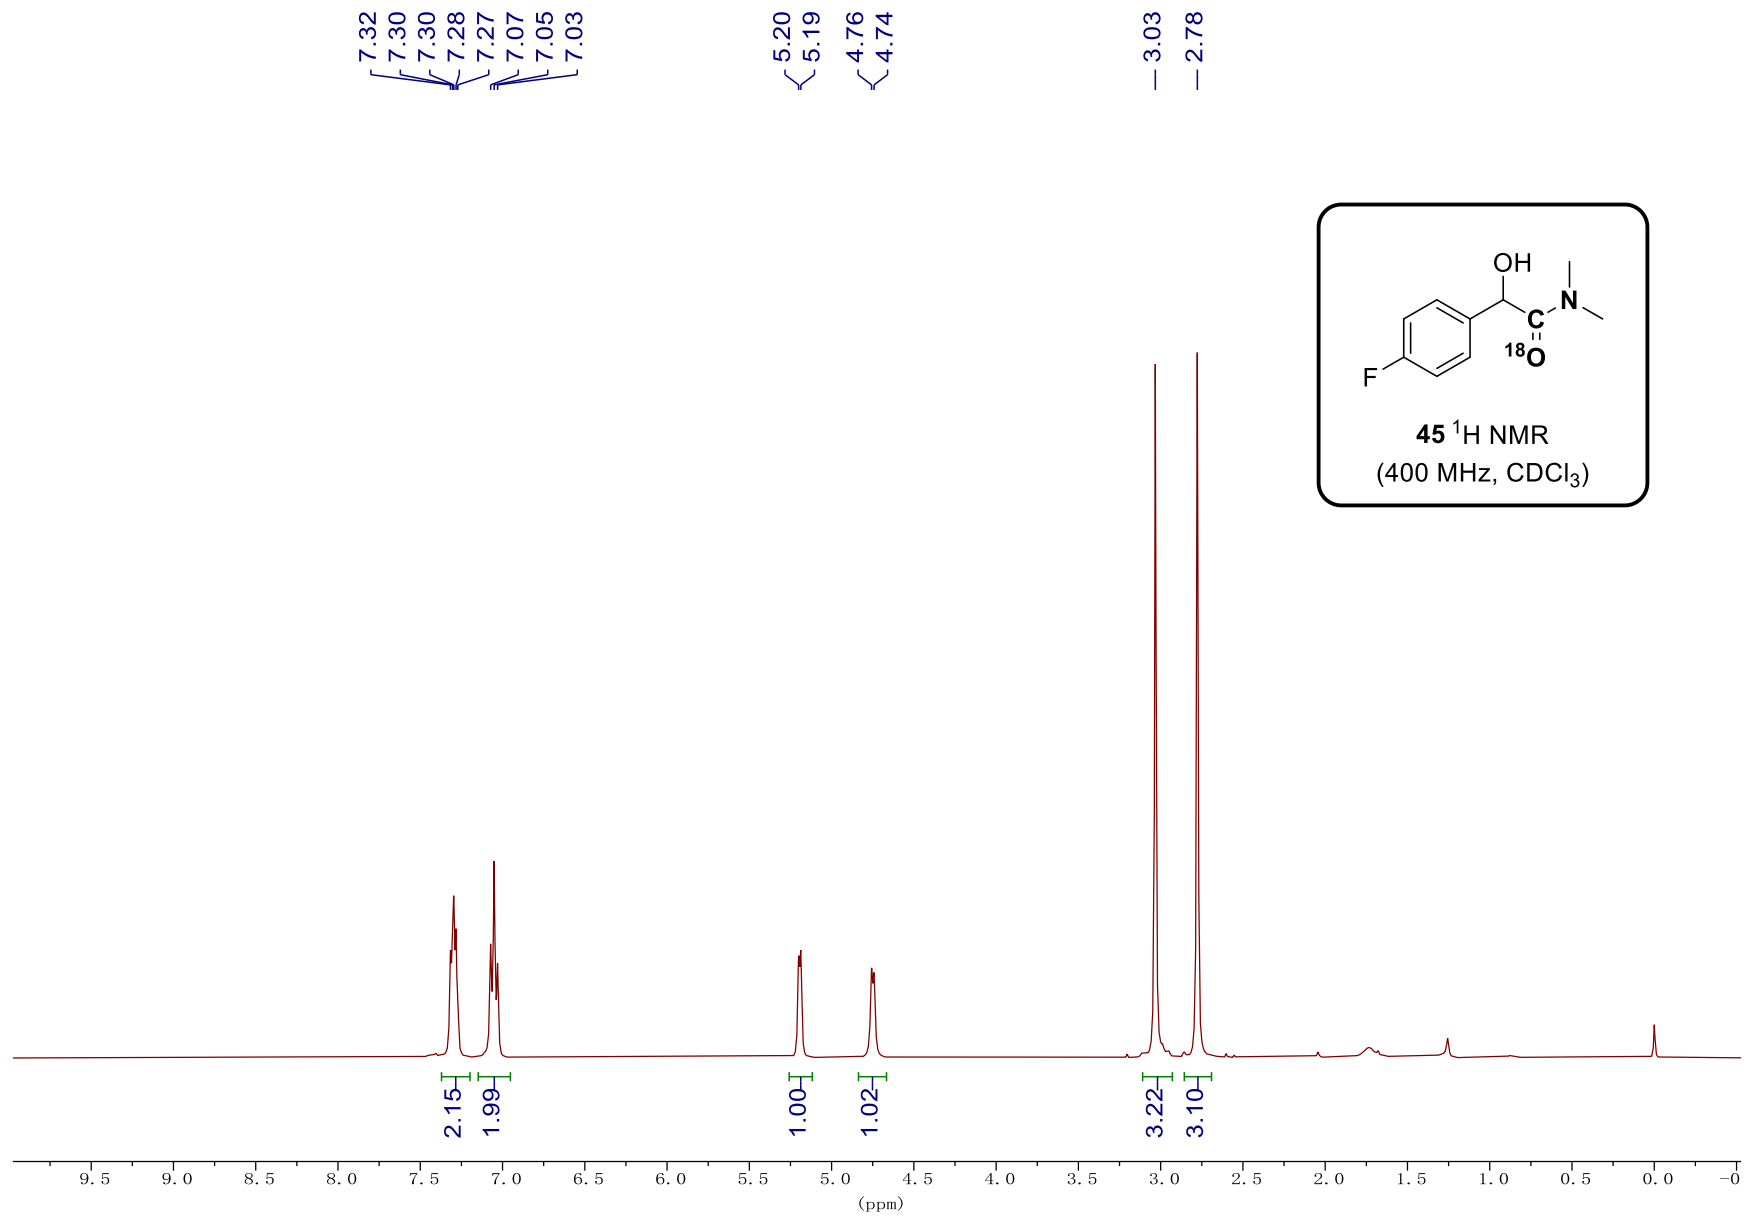

-113.67  
-113.68  
-113.70  
-113.71  
-113.72

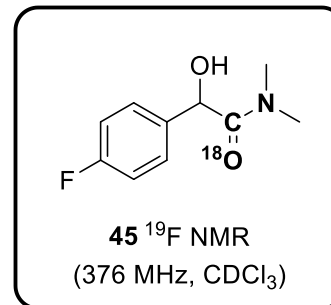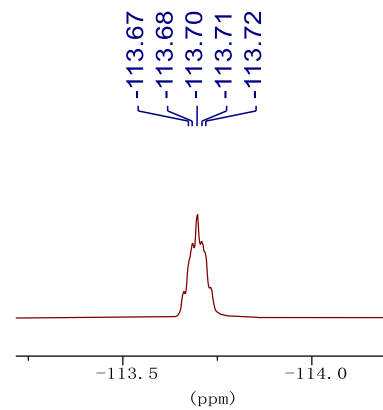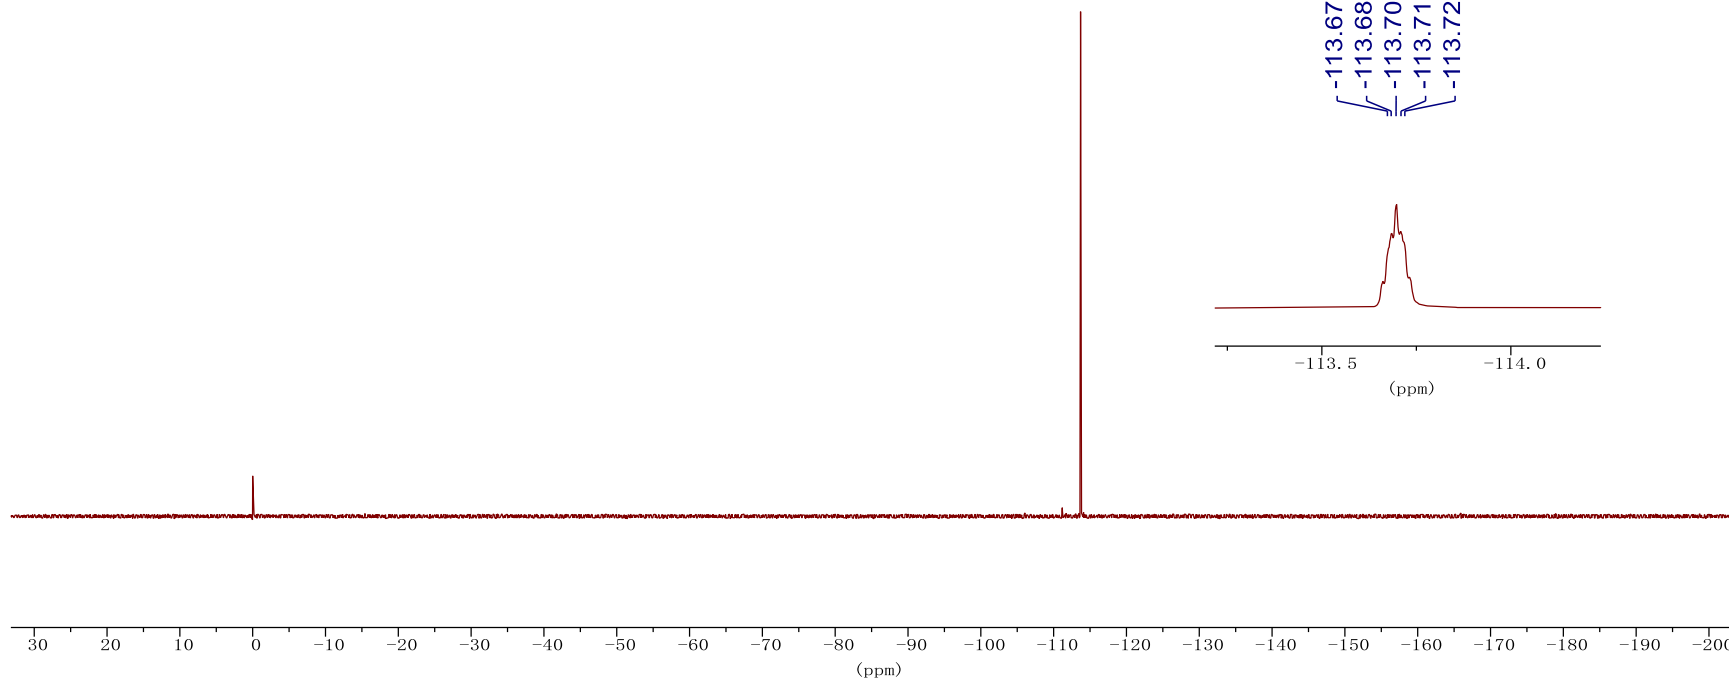

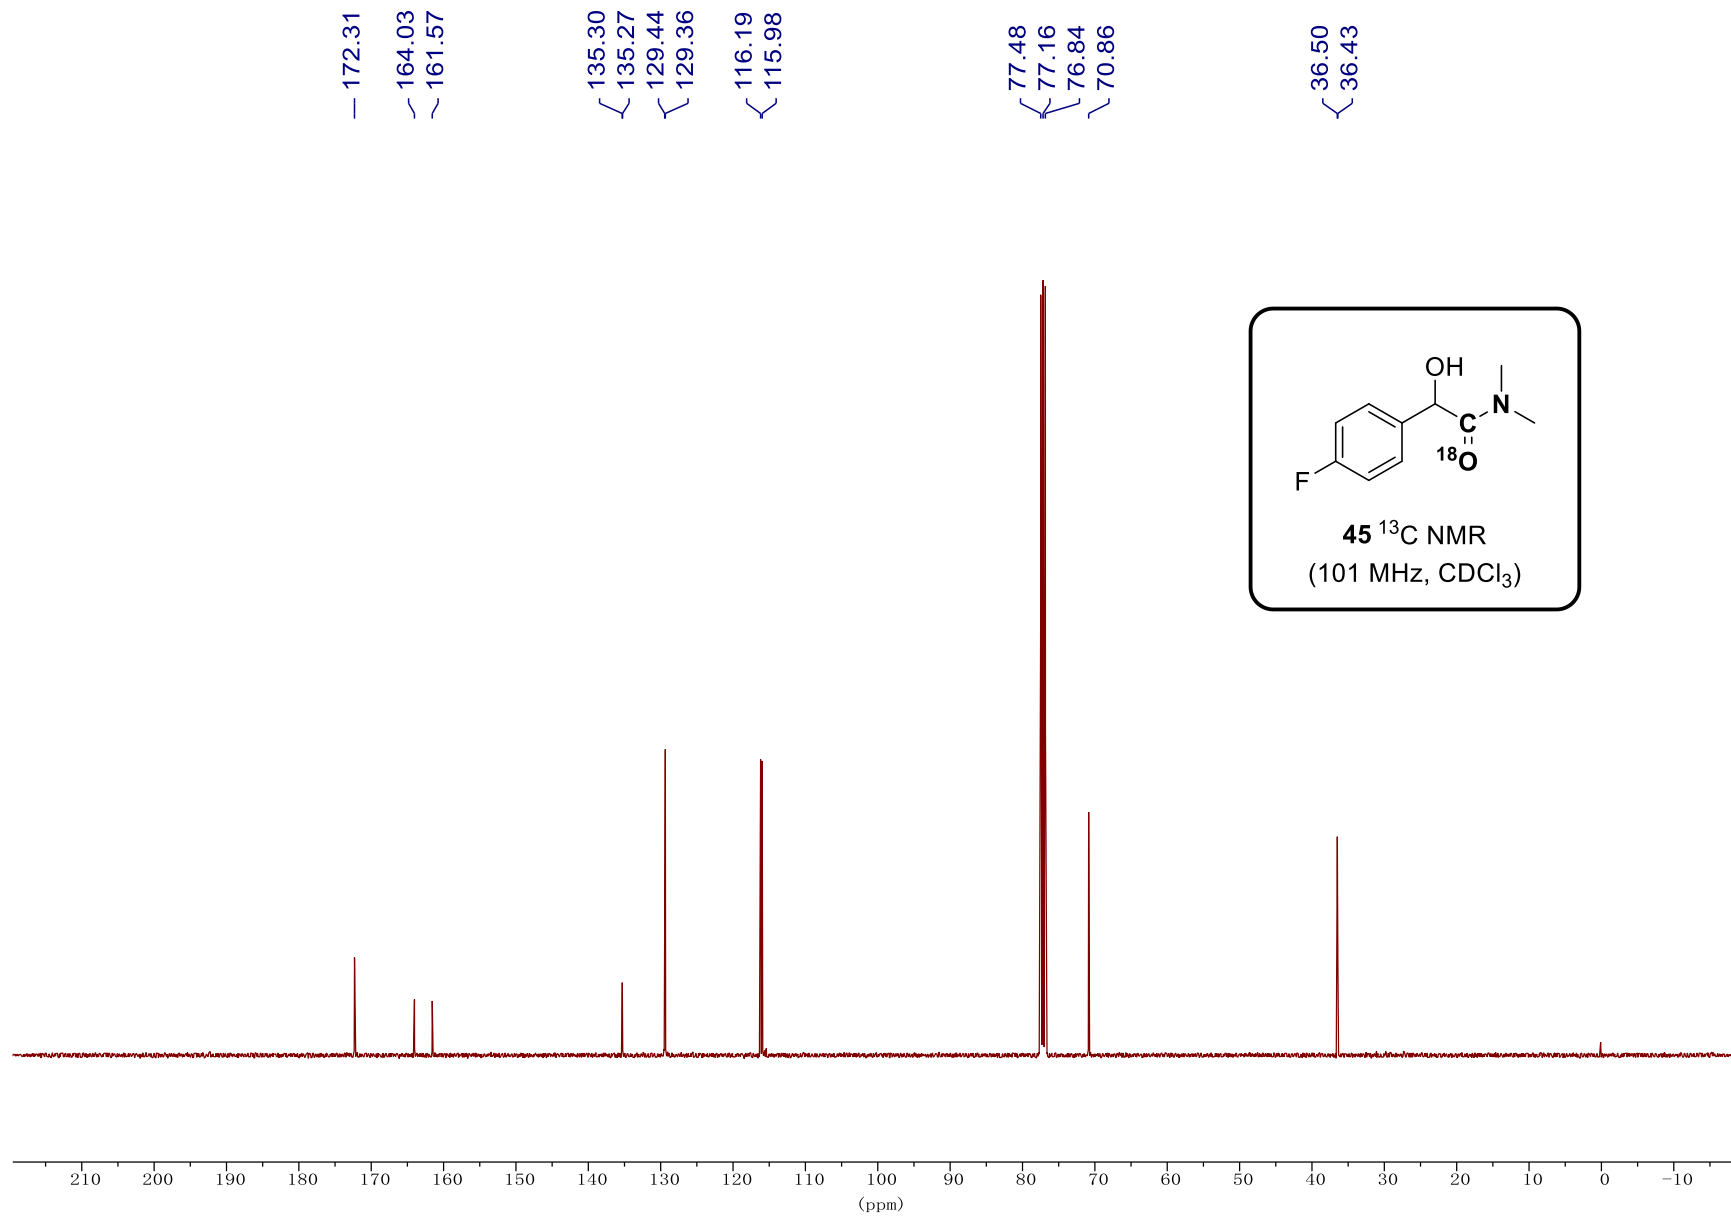

文件 : D:\LA\LA13\2018132LA-13-43-2.D  
 操作員 :  
 已採集 : 17 Apr 2023 17:04 , 使用採集方法 LA-QUICKTEST-HIGH.M  
 儀器 : 59150CMS  
 樣品名稱 :  
 其他信息 :  
 樣品瓶號 : 8

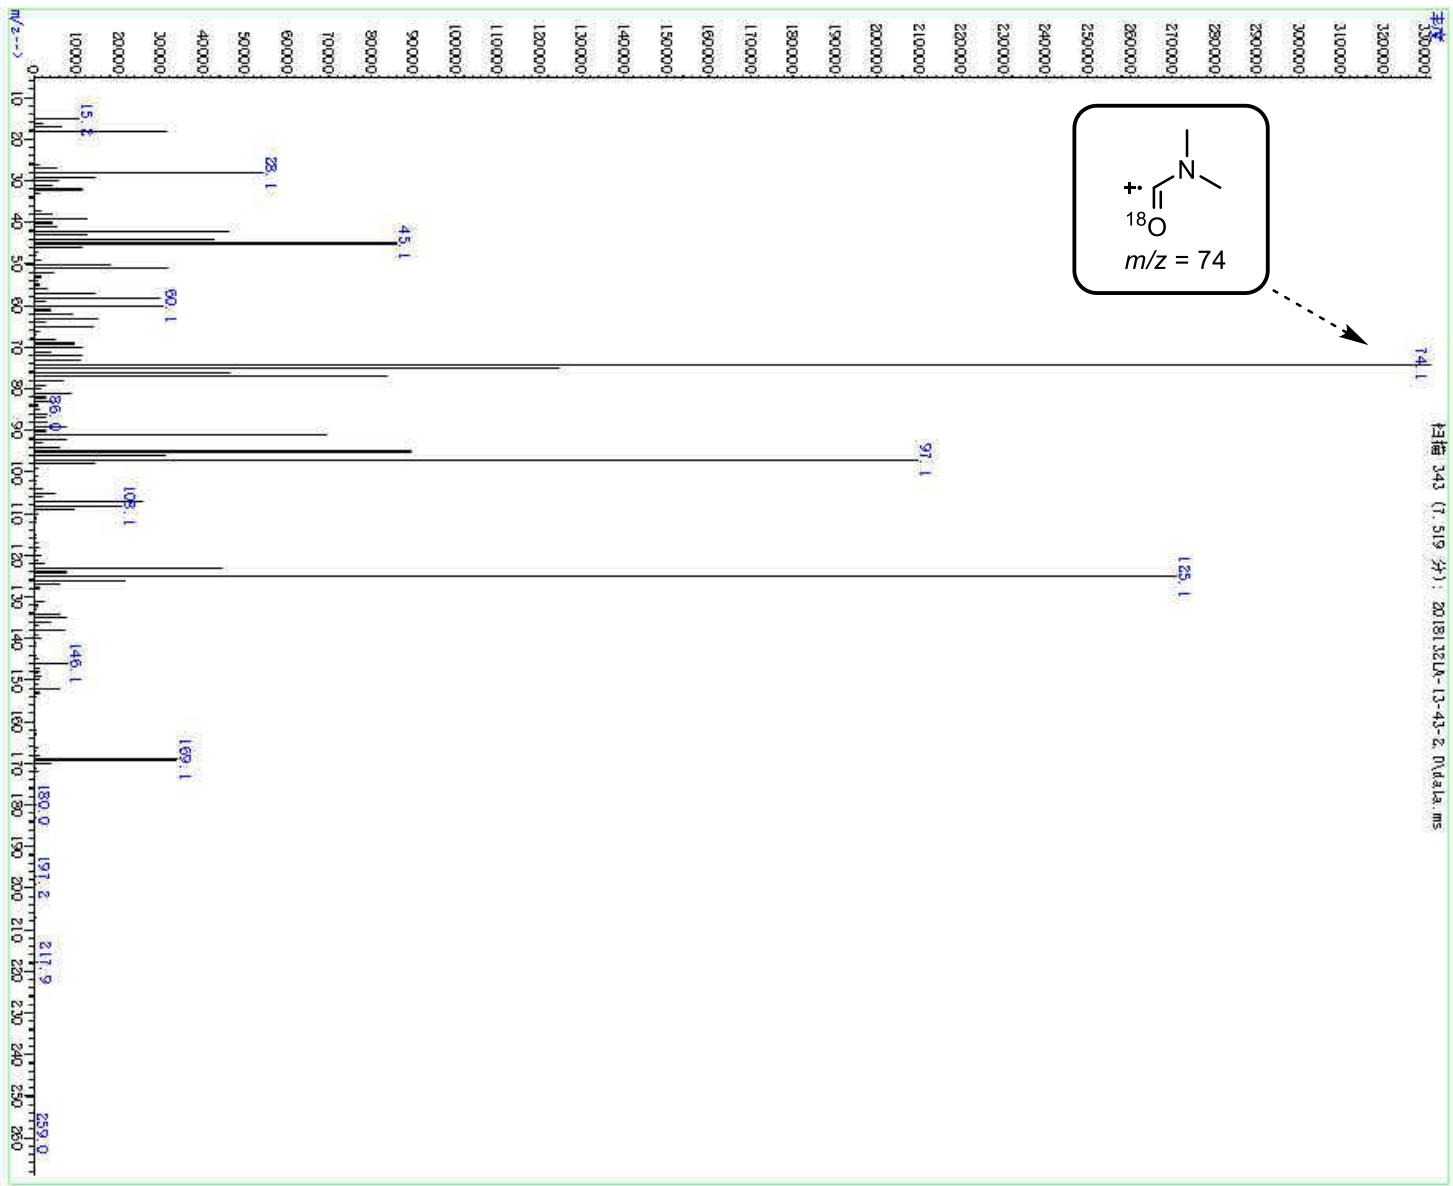



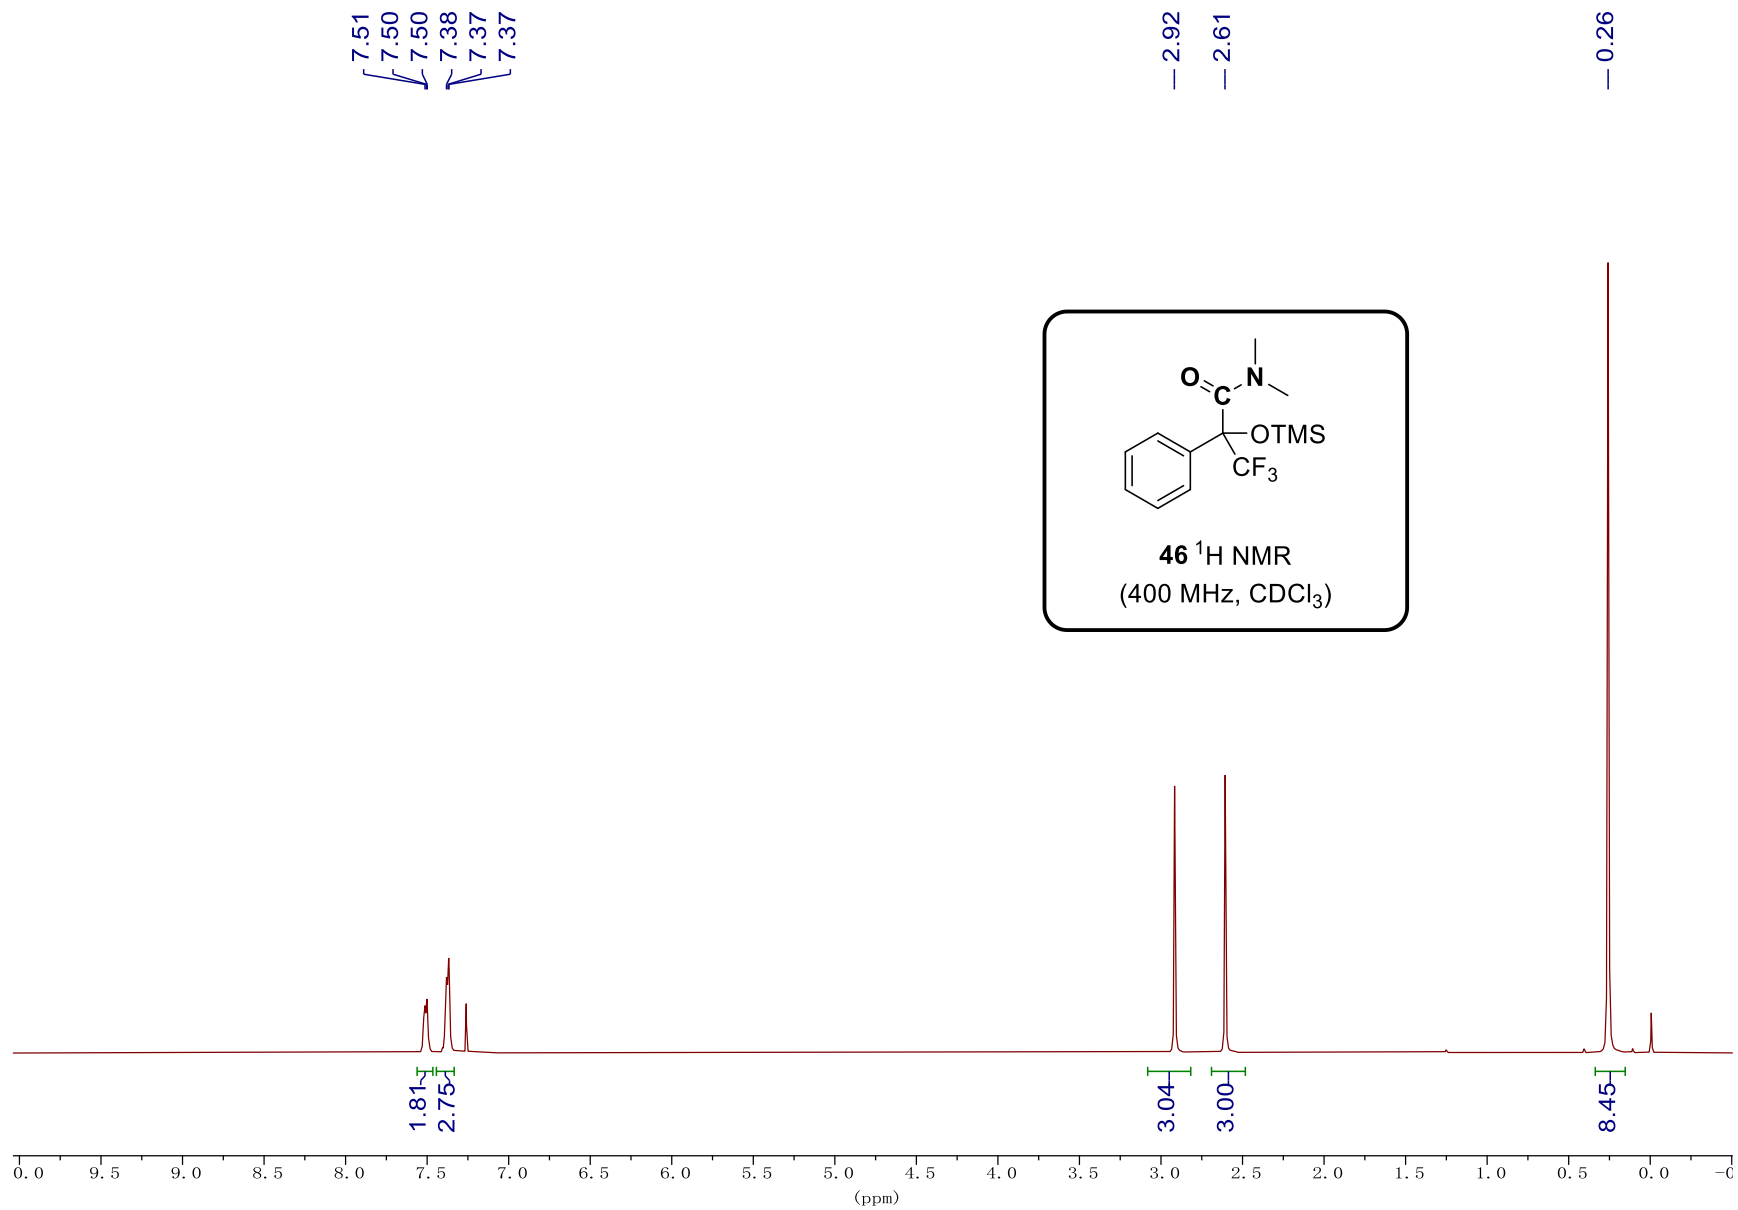

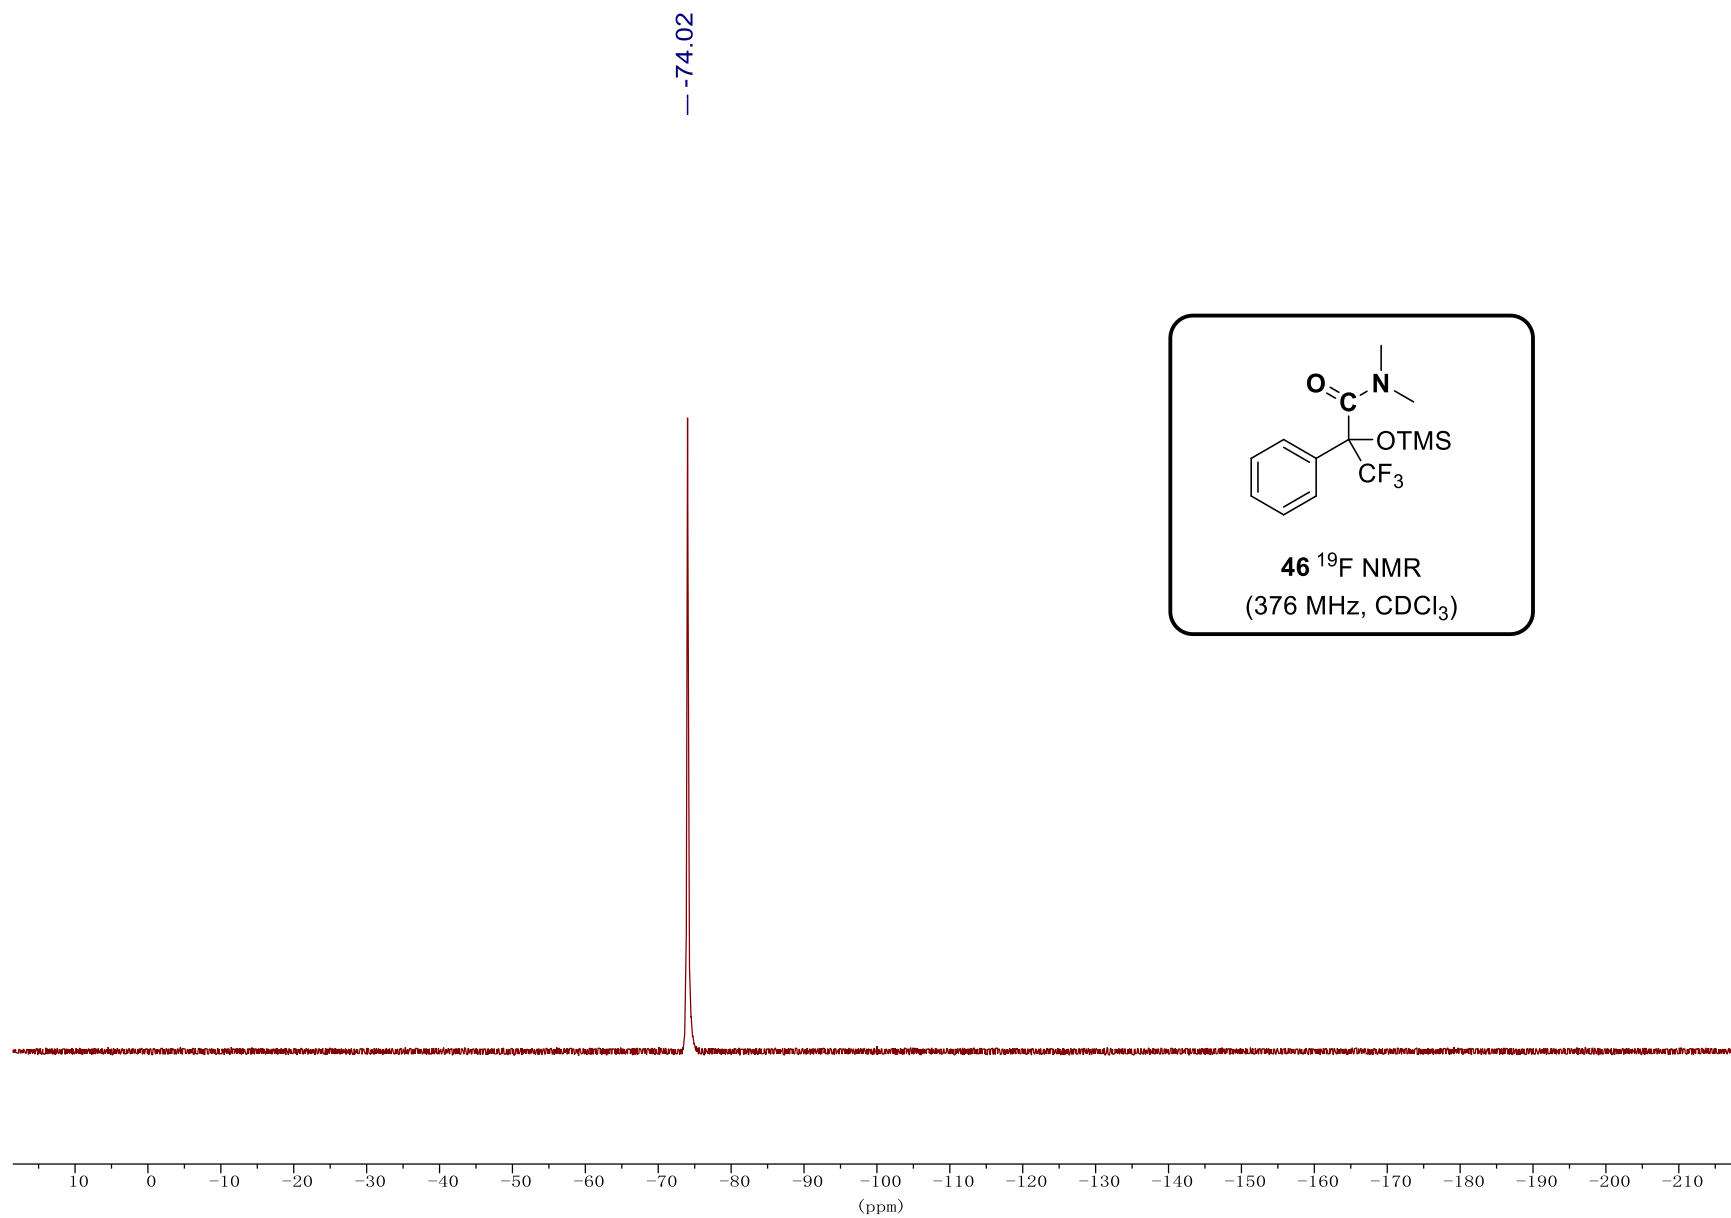

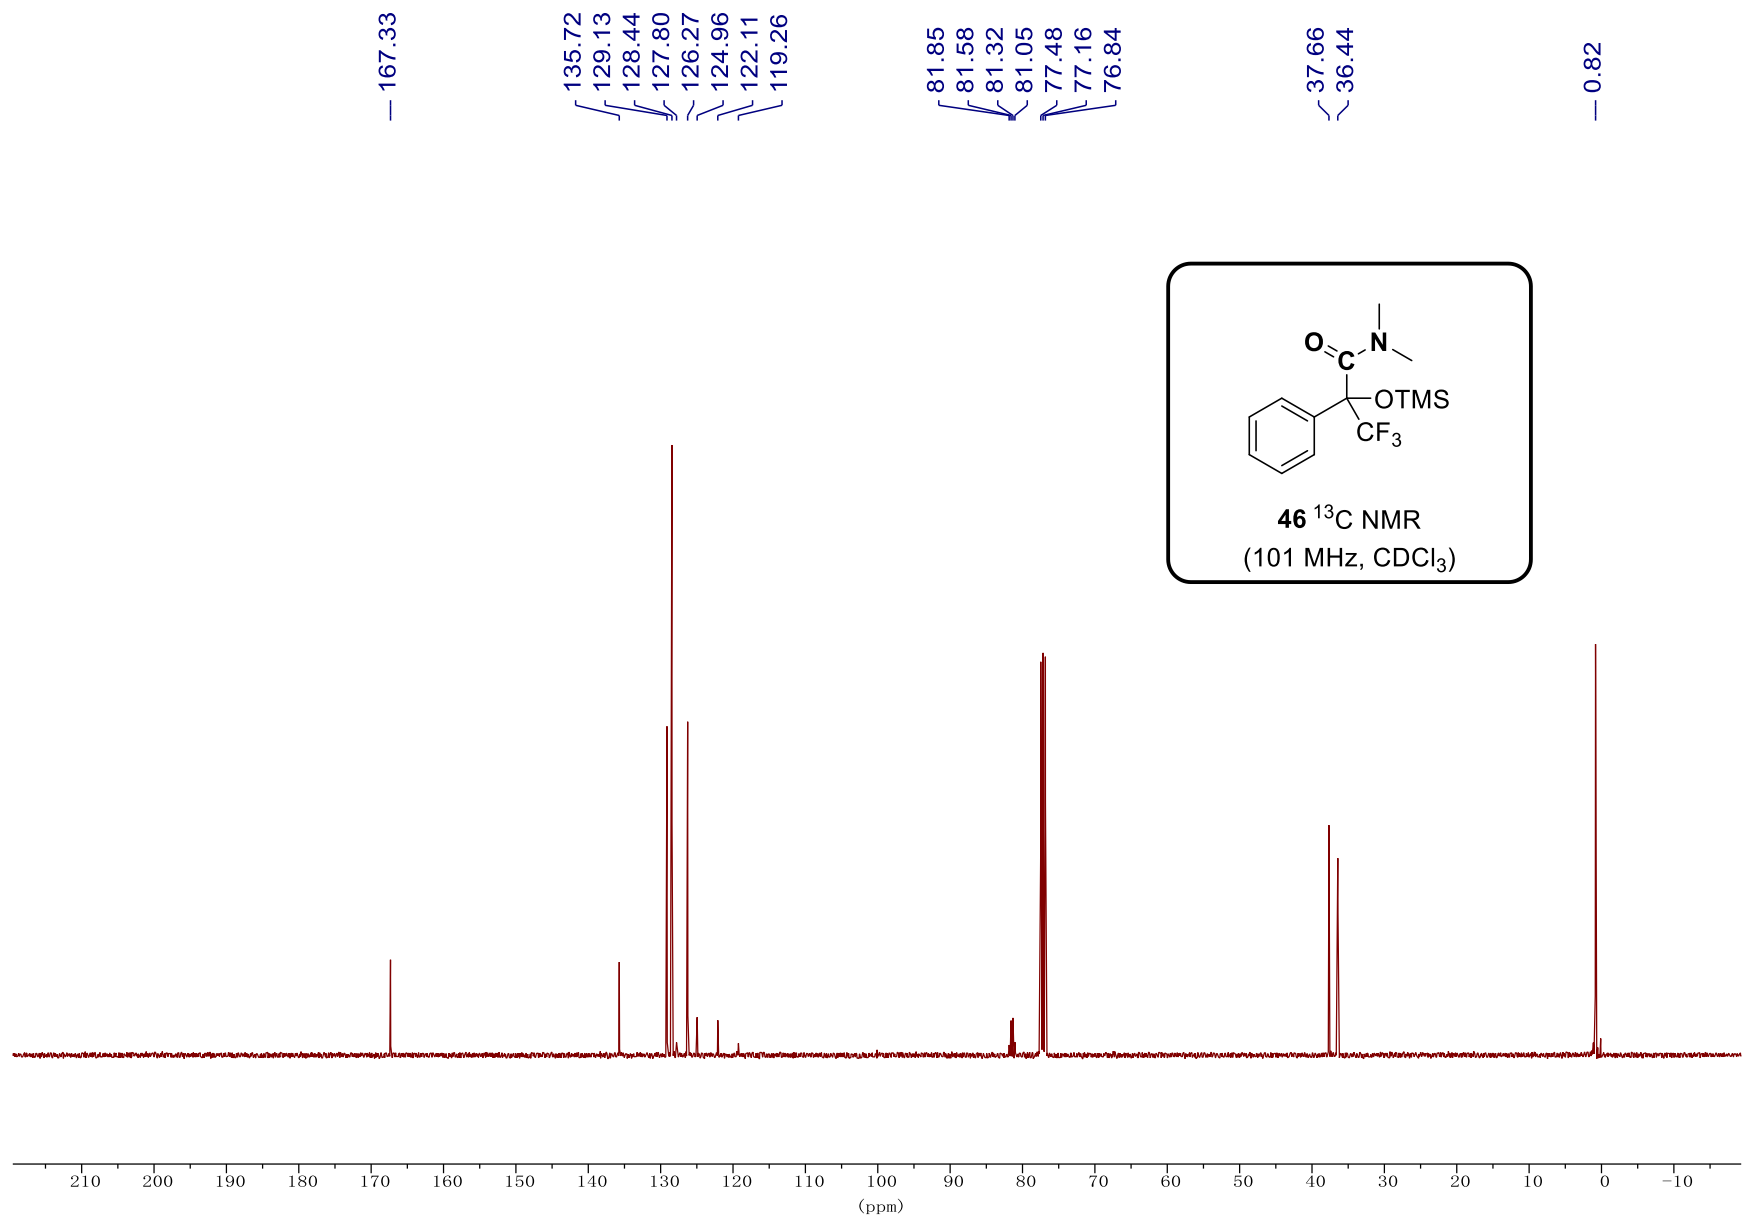

Supplement: d3qo00665d1.pdf [file d3qo00665d1.pdf]
